# Supplementary material for: Flavonoid-Modifying Capabilities of the Human Gut Microbiome—An In Silico Study
Source: Nutrients. 2021 Aug 3;13(8):2688. doi: 10.3390/nu13082688 (PMC8398226; doi:10.3390/nu13082688)
Supplement: Supplementary file 1 [file nutrients-13-02688-s001.zip › Supplementary Excel File-pivot table.xlsx]

## Sheet: all_40PID_uniq_cut
Hit_NR	Hit_R	Query	FlavModClass	QStart	QEnd	SStart	SEnd	ALength	PIdentity	EValue	Bitscore	QCov	Length	N_contigs	N50	GC_content	Completeness	Contamination	Species_rep	Lineage	Sample_accession	Study_accession	Country	FTP_download	Frequency
GUT_GENOME000001_00758	GUT_GENOME000001_00758	ANI69961.1	O-demethylation	1	197	1	198	198	49.495	1.83e-61	200	93	3221441	137	47272	28.26	98.59	0.7	GUT_GENOME000001	d__Bacteria;p__Firmicutes_A;c__Clostridia;o__Peptostreptococcales;f__Peptostreptococcaceae;g__GCA-900066495;s__	ERS370061	ERP105624	United Kingdom	ftp://ftp.ebi.ac.uk/pub/databases/metagenomics/mgnify_genomes/human-gut/v1.0/all_genomes/MGYG-HGUT-000/MGYG-HGUT-00001/genomes1/GUT_GENOME000001.gff.gz	2
GUT_GENOME241894_01564	GUT_GENOME000745_03187	AAO76887.1	O-deglycosylation	1	950	5	954	950	100	0	1981	100	6171051	84	212664	42.9	99.46	0.49	GUT_GENOME001120	d__Bacteria;p__Bacteroidota;c__Bacteroidia;o__Bacteroidales;f__Bacteroidaceae;g__Bacteroides;s__Bacteroides thetaiotaomicron	SAMN09734171	PRJNA482748	China	ftp://ftp.ebi.ac.uk/pub/databases/metagenomics/mgnify_genomes/human-gut/v1.0/all_genomes/MGYG-HGUT-001/MGYG-HGUT-00196/genomes2/GUT_GENOME000745.gff.gz	129
GUT_GENOME000004_00661	GUT_GENOME000004_00661	QBM20342.1	De-rhamnosylation	1	887	1	887	895	54.525	0	1011	99	4434075	100	109266	42.6	99.37	0	GUT_GENOME000004	d__Bacteria;p__Firmicutes_A;c__Clostridia;o__Lachnospirales;f__Lachnospiraceae;g__Blautia_A;s__Blautia_A sp900066165	ERS370064	ERP105624	United Kingdom	ftp://ftp.ebi.ac.uk/pub/databases/metagenomics/mgnify_genomes/human-gut/v1.0/all_genomes/MGYG-HGUT-000/MGYG-HGUT-00002/genomes1/GUT_GENOME000004.gff.gz	1
GUT_GENOME241894_01564	GUT_GENOME167387_01753	AAO76887.1	O-deglycosylation	1	950	5	954	950	100	0	1981	100	3168573	169	29191	47.92	74.37	3.08	GUT_GENOME096083	d__Bacteria;p__Bacteroidota;c__Bacteroidia;o__Bacteroidales;f__Bacteroidaceae;g__Bacteroides;s__Bacteroides uniformis	SRS584698	SRP040765	United States	ftp://ftp.ebi.ac.uk/pub/databases/metagenomics/mgnify_genomes/human-gut/v1.0/all_genomes/MGYG-HGUT-013/MGYG-HGUT-01346/genomes9/GUT_GENOME167387.gff.gz	1
GUT_GENOME165131_00461	GUT_GENOME165131_00461	KEF28001.1	O-deglycosylation	89	779	1	699	717	67.225	0	970	89	1459829	157	12655	46.58	88.08	1.46	GUT_GENOME207408	d__Bacteria;p__Actinobacteriota;c__Actinobacteria;o__Actinomycetales;f__Bifidobacteriaceae;g__Alloscardovia;s__Alloscardovia omnicolens	SRS576120	SRP040146	United States	ftp://ftp.ebi.ac.uk/pub/databases/metagenomics/mgnify_genomes/human-gut/v1.0/all_genomes/MGYG-HGUT-031/MGYG-HGUT-03120/genomes1/GUT_GENOME165131.gff.gz	1
GUT_GENOME244333_00259	GUT_GENOME244333_00259	KEF28001.1	O-deglycosylation	13	779	18	790	793	66.33	0	1045	98	1505690	215	8744	46.28	87.36	1.06	GUT_GENOME207408	d__Bacteria;p__Actinobacteriota;c__Actinobacteria;o__Actinomycetales;f__Bifidobacteriaceae;g__Alloscardovia;s__Alloscardovia omnicolens	SRS1101418	SRP064400	Canada	ftp://ftp.ebi.ac.uk/pub/databases/metagenomics/mgnify_genomes/human-gut/v1.0/all_genomes/MGYG-HGUT-031/MGYG-HGUT-03120/genomes1/GUT_GENOME244333.gff.gz	1
GUT_GENOME164733_00576	GUT_GENOME164733_00576	KEF28010.1	O-deglycosylation	8	746	3	742	741	66.262	0	991	99	1494659	176	11846	46.73	85.27	0.53	GUT_GENOME207408	d__Bacteria;p__Actinobacteriota;c__Actinobacteria;o__Actinomycetales;f__Bifidobacteriaceae;g__Alloscardovia;s__Alloscardovia omnicolens	SRS576120	SRP040146	United States	ftp://ftp.ebi.ac.uk/pub/databases/metagenomics/mgnify_genomes/human-gut/v1.0/all_genomes/MGYG-HGUT-031/MGYG-HGUT-03120/genomes1/GUT_GENOME164733.gff.gz	1
GUT_GENOME166650_01125	GUT_GENOME166650_01125	KEF28010.1	O-deglycosylation	8	746	3	742	741	66.262	0	992	99	1399803	157	12350	46.6	86.8	0.6	GUT_GENOME207408	d__Bacteria;p__Actinobacteriota;c__Actinobacteria;o__Actinomycetales;f__Bifidobacteriaceae;g__Alloscardovia;s__Alloscardovia omnicolens	SRS576120	SRP040146	United States	ftp://ftp.ebi.ac.uk/pub/databases/metagenomics/mgnify_genomes/human-gut/v1.0/all_genomes/MGYG-HGUT-031/MGYG-HGUT-03120/genomes1/GUT_GENOME166650.gff.gz	1
GUT_GENOME207408_00015	GUT_GENOME207408_00015	KEF28010.1	O-deglycosylation	8	744	3	740	739	66.171	0	993	99	1682492	65	42340	46.85	99.48	0.55	GUT_GENOME207408	d__Bacteria;p__Actinobacteriota;c__Actinobacteria;o__Actinomycetales;f__Bifidobacteriaceae;g__Alloscardovia;s__Alloscardovia omnicolens	SRS2455769	SRP114966	United States	ftp://ftp.ebi.ac.uk/pub/databases/metagenomics/mgnify_genomes/human-gut/v1.0/all_genomes/MGYG-HGUT-031/MGYG-HGUT-03120/genomes1/GUT_GENOME207408.gff.gz	1
GUT_GENOME000251_00960	GUT_GENOME000251_00960	CCC80442.1	De-rhamnosylation	4	523	3	521	525	42.857	5.94e-149	446	99	4542778	86	120234	42.69	98.73	0.63	GUT_GENOME000004	d__Bacteria;p__Firmicutes_A;c__Clostridia;o__Lachnospirales;f__Lachnospiraceae;g__Blautia_A;s__Blautia_A sp900066165	ERS852522	ERP012217	United Kingdom	ftp://ftp.ebi.ac.uk/pub/databases/metagenomics/mgnify_genomes/human-gut/v1.0/all_genomes/MGYG-HGUT-000/MGYG-HGUT-00002/genomes1/GUT_GENOME000251.gff.gz	28
GUT_GENOME164848_00115	GUT_GENOME164848_00115	KEF28010.1	O-deglycosylation	8	744	3	740	739	65.765	0	993	99	1433370	167	11200	46.76	85.9	1.74	GUT_GENOME207408	d__Bacteria;p__Actinobacteriota;c__Actinobacteria;o__Actinomycetales;f__Bifidobacteriaceae;g__Alloscardovia;s__Alloscardovia omnicolens	SRS576120	SRP040146	United States	ftp://ftp.ebi.ac.uk/pub/databases/metagenomics/mgnify_genomes/human-gut/v1.0/all_genomes/MGYG-HGUT-031/MGYG-HGUT-03120/genomes1/GUT_GENOME164848.gff.gz	1
GUT_GENOME000485_02952	GUT_GENOME000485_02952	CCC80442.1	De-rhamnosylation	4	523	3	521	525	43.238	9.69e-152	453	99	4289261	69	129395	42.84	99.37	0	GUT_GENOME000004	d__Bacteria;p__Firmicutes_A;c__Clostridia;o__Lachnospirales;f__Lachnospiraceae;g__Blautia_A;s__Blautia_A sp900066165	ERS2046377	ERP105624	United Kingdom	ftp://ftp.ebi.ac.uk/pub/databases/metagenomics/mgnify_genomes/human-gut/v1.0/all_genomes/MGYG-HGUT-000/MGYG-HGUT-00002/genomes1/GUT_GENOME000485.gff.gz	1
GUT_GENOME165131_01175	GUT_GENOME165131_01175	KEF28010.1	O-deglycosylation	8	744	3	740	739	65.765	0	993	99	1459829	157	12655	46.58	88.08	1.46	GUT_GENOME207408	d__Bacteria;p__Actinobacteriota;c__Actinobacteria;o__Actinomycetales;f__Bifidobacteriaceae;g__Alloscardovia;s__Alloscardovia omnicolens	SRS576120	SRP040146	United States	ftp://ftp.ebi.ac.uk/pub/databases/metagenomics/mgnify_genomes/human-gut/v1.0/all_genomes/MGYG-HGUT-031/MGYG-HGUT-03120/genomes1/GUT_GENOME165131.gff.gz	2
GUT_GENOME000701_02301	GUT_GENOME000701_02301	CCC80442.1	De-rhamnosylation	4	523	3	521	525	43.238	9.69e-152	453	99	4311987	61	155121	42.83	99.37	0	GUT_GENOME000004	d__Bacteria;p__Firmicutes_A;c__Clostridia;o__Lachnospirales;f__Lachnospiraceae;g__Blautia_A;s__Blautia_A sp900066165	ERS2046459	ERP105624	United Kingdom	ftp://ftp.ebi.ac.uk/pub/databases/metagenomics/mgnify_genomes/human-gut/v1.0/all_genomes/MGYG-HGUT-000/MGYG-HGUT-00002/genomes1/GUT_GENOME000701.gff.gz	1
GUT_GENOME001598_00723	GUT_GENOME192908_01714	ANI69961.1	O-demethylation	3	205	5	207	203	43.842	1.49e-55	185	96	2945190	231	18491	43.56	80.79	4.87	GUT_GENOME000004	d__Bacteria;p__Firmicutes_A;c__Clostridia;o__Lachnospirales;f__Lachnospiraceae;g__Blautia_A;s__Blautia_A sp900066165	SRS1820456	SRP093965	United States	ftp://ftp.ebi.ac.uk/pub/databases/metagenomics/mgnify_genomes/human-gut/v1.0/all_genomes/MGYG-HGUT-000/MGYG-HGUT-00002/genomes1/GUT_GENOME192908.gff.gz	1
GUT_GENOME156970_00080	GUT_GENOME156970_00080	KEF28010.1	O-deglycosylation	8	746	3	742	741	65.722	0	992	99	1212688	256	5293	46.34	67.55	0.55	GUT_GENOME207408	d__Bacteria;p__Actinobacteriota;c__Actinobacteria;o__Actinomycetales;f__Bifidobacteriaceae;g__Alloscardovia;s__Alloscardovia omnicolens	ERS475391	ERP005860	China	ftp://ftp.ebi.ac.uk/pub/databases/metagenomics/mgnify_genomes/human-gut/v1.0/all_genomes/MGYG-HGUT-031/MGYG-HGUT-03120/genomes1/GUT_GENOME156970.gff.gz	1
GUT_GENOME001758_02407	GUT_GENOME089916_01168	CCC80440.1	De-rhamnosylation	3	652	1	654	655	45.344	0	604	99	3159548	810	5451	43.59	81.11	3.59	GUT_GENOME000004	d__Bacteria;p__Firmicutes_A;c__Clostridia;o__Lachnospirales;f__Lachnospiraceae;g__Blautia_A;s__Blautia_A sp900066165	ERS608593	ERP008729	Austria	ftp://ftp.ebi.ac.uk/pub/databases/metagenomics/mgnify_genomes/human-gut/v1.0/all_genomes/MGYG-HGUT-000/MGYG-HGUT-00002/genomes1/GUT_GENOME089916.gff.gz	1
GUT_GENOME001761_00011	GUT_GENOME001761_00011	CCC80442.1	De-rhamnosylation	4	523	3	521	525	42.667	9.68e-149	446	99	4700343	106	99325	42.48	97.76	0.63	GUT_GENOME000004	d__Bacteria;p__Firmicutes_A;c__Clostridia;o__Lachnospirales;f__Lachnospiraceae;g__Blautia_A;s__Blautia_A sp900066165	SAMN09736538	PRJNA482748	China	ftp://ftp.ebi.ac.uk/pub/databases/metagenomics/mgnify_genomes/human-gut/v1.0/all_genomes/MGYG-HGUT-000/MGYG-HGUT-00002/genomes1/GUT_GENOME001761.gff.gz	1
GUT_GENOME164848_00795	GUT_GENOME164583_00965	KEF28001.1	O-deglycosylation	4	779	9	790	802	65.711	0	1054	99	1393424	170	10023	46.35	84.09	1.45	GUT_GENOME207408	d__Bacteria;p__Actinobacteriota;c__Actinobacteria;o__Actinomycetales;f__Bifidobacteriaceae;g__Alloscardovia;s__Alloscardovia omnicolens	SRS576120	SRP040146	United States	ftp://ftp.ebi.ac.uk/pub/databases/metagenomics/mgnify_genomes/human-gut/v1.0/all_genomes/MGYG-HGUT-031/MGYG-HGUT-03120/genomes1/GUT_GENOME164583.gff.gz	10
GUT_GENOME164733_00814	GUT_GENOME164733_00814	KEF28001.1	O-deglycosylation	4	779	9	790	802	65.586	0	1051	99	1494659	176	11846	46.73	85.27	0.53	GUT_GENOME207408	d__Bacteria;p__Actinobacteriota;c__Actinobacteria;o__Actinomycetales;f__Bifidobacteriaceae;g__Alloscardovia;s__Alloscardovia omnicolens	SRS576120	SRP040146	United States	ftp://ftp.ebi.ac.uk/pub/databases/metagenomics/mgnify_genomes/human-gut/v1.0/all_genomes/MGYG-HGUT-031/MGYG-HGUT-03120/genomes1/GUT_GENOME164733.gff.gz	1
GUT_GENOME164733_00016	GUT_GENOME164733_00016	KEF27912.1	O-deglycosylation	4	809	16	821	806	59.801	0	993	99	1494659	176	11846	46.73	85.27	0.53	GUT_GENOME207408	d__Bacteria;p__Actinobacteriota;c__Actinobacteria;o__Actinomycetales;f__Bifidobacteriaceae;g__Alloscardovia;s__Alloscardovia omnicolens	SRS576120	SRP040146	United States	ftp://ftp.ebi.ac.uk/pub/databases/metagenomics/mgnify_genomes/human-gut/v1.0/all_genomes/MGYG-HGUT-031/MGYG-HGUT-03120/genomes1/GUT_GENOME164733.gff.gz	3
GUT_GENOME164848_00170	GUT_GENOME164848_00170	KEF27912.1	O-deglycosylation	4	809	16	821	806	59.801	0	992	99	1433370	167	11200	46.76	85.9	1.74	GUT_GENOME207408	d__Bacteria;p__Actinobacteriota;c__Actinobacteria;o__Actinomycetales;f__Bifidobacteriaceae;g__Alloscardovia;s__Alloscardovia omnicolens	SRS576120	SRP040146	United States	ftp://ftp.ebi.ac.uk/pub/databases/metagenomics/mgnify_genomes/human-gut/v1.0/all_genomes/MGYG-HGUT-031/MGYG-HGUT-03120/genomes1/GUT_GENOME164848.gff.gz	3
GUT_GENOME003146_01821	GUT_GENOME003146_01821	CCC80442.1	De-rhamnosylation	88	523	2	438	441	45.351	4.48e-134	405	83	2568923	522	6266	44.01	80.44	1.74	GUT_GENOME000004	d__Bacteria;p__Firmicutes_A;c__Clostridia;o__Lachnospirales;f__Lachnospiraceae;g__Blautia_A;s__Blautia_A sp900066165	ERS473106	ERP005989	Sweden	ftp://ftp.ebi.ac.uk/pub/databases/metagenomics/mgnify_genomes/human-gut/v1.0/all_genomes/MGYG-HGUT-000/MGYG-HGUT-00002/genomes1/GUT_GENOME003146.gff.gz	2
GUT_GENOME165383_00427	GUT_GENOME165383_00427	KEF27912.1	O-deglycosylation	4	809	16	821	806	59.801	0	994	99	1496639	161	12922	46.64	88.63	0.76	GUT_GENOME207408	d__Bacteria;p__Actinobacteriota;c__Actinobacteria;o__Actinomycetales;f__Bifidobacteriaceae;g__Alloscardovia;s__Alloscardovia omnicolens	SRS576120	SRP040146	United States	ftp://ftp.ebi.ac.uk/pub/databases/metagenomics/mgnify_genomes/human-gut/v1.0/all_genomes/MGYG-HGUT-031/MGYG-HGUT-03120/genomes1/GUT_GENOME165383.gff.gz	1
GUT_GENOME003937_00120	GUT_GENOME003937_00120	CCC80442.1	De-rhamnosylation	4	523	3	521	525	43.429	2.01e-152	455	99	3368844	153	40992	43.45	93.99	4.58	GUT_GENOME000004	d__Bacteria;p__Firmicutes_A;c__Clostridia;o__Lachnospirales;f__Lachnospiraceae;g__Blautia_A;s__Blautia_A sp900066165	ERS473170	ERP005989	Sweden	ftp://ftp.ebi.ac.uk/pub/databases/metagenomics/mgnify_genomes/human-gut/v1.0/all_genomes/MGYG-HGUT-000/MGYG-HGUT-00002/genomes1/GUT_GENOME003937.gff.gz	1
GUT_GENOME003937_00318	GUT_GENOME003937_00318	QBM20342.1	De-rhamnosylation	1	887	1	887	895	54.637	0	1014	99	3368844	153	40992	43.45	93.99	4.58	GUT_GENOME000004	d__Bacteria;p__Firmicutes_A;c__Clostridia;o__Lachnospirales;f__Lachnospiraceae;g__Blautia_A;s__Blautia_A sp900066165	ERS473170	ERP005989	Sweden	ftp://ftp.ebi.ac.uk/pub/databases/metagenomics/mgnify_genomes/human-gut/v1.0/all_genomes/MGYG-HGUT-000/MGYG-HGUT-00002/genomes1/GUT_GENOME003937.gff.gz	3
GUT_GENOME166103_00129	GUT_GENOME166103_00129	KEF27912.1	O-deglycosylation	4	809	16	821	806	59.801	0	993	99	1401141	168	10174	46.41	83.33	1.29	GUT_GENOME207408	d__Bacteria;p__Actinobacteriota;c__Actinobacteria;o__Actinomycetales;f__Bifidobacteriaceae;g__Alloscardovia;s__Alloscardovia omnicolens	SRS576120	SRP040146	United States	ftp://ftp.ebi.ac.uk/pub/databases/metagenomics/mgnify_genomes/human-gut/v1.0/all_genomes/MGYG-HGUT-031/MGYG-HGUT-03120/genomes1/GUT_GENOME166103.gff.gz	1
GUT_GENOME004166_00268	GUT_GENOME004166_00268	ANI69962.1	O-demethylation	2	257	1	255	257	40.078	1.1e-55	202	94	1920814	568	3673	44.26	57.95	0.63	GUT_GENOME000004	d__Bacteria;p__Firmicutes_A;c__Clostridia;o__Lachnospirales;f__Lachnospiraceae;g__Blautia_A;s__Blautia_A sp900066165	ERS473186	ERP005989	Sweden	ftp://ftp.ebi.ac.uk/pub/databases/metagenomics/mgnify_genomes/human-gut/v1.0/all_genomes/MGYG-HGUT-000/MGYG-HGUT-00002/genomes1/GUT_GENOME004166.gff.gz	1
GUT_GENOME166650_00940	GUT_GENOME166650_00940	KEF27912.1	O-deglycosylation	4	809	16	821	806	59.801	0	982	99	1399803	157	12350	46.6	86.8	0.6	GUT_GENOME207408	d__Bacteria;p__Actinobacteriota;c__Actinobacteria;o__Actinomycetales;f__Bifidobacteriaceae;g__Alloscardovia;s__Alloscardovia omnicolens	SRS576120	SRP040146	United States	ftp://ftp.ebi.ac.uk/pub/databases/metagenomics/mgnify_genomes/human-gut/v1.0/all_genomes/MGYG-HGUT-031/MGYG-HGUT-03120/genomes1/GUT_GENOME166650.gff.gz	1
GUT_GENOME244333_00590	GUT_GENOME244333_00590	KEF27912.1	O-deglycosylation	4	809	16	821	806	59.801	0	982	99	1505690	215	8744	46.28	87.36	1.06	GUT_GENOME207408	d__Bacteria;p__Actinobacteriota;c__Actinobacteria;o__Actinomycetales;f__Bifidobacteriaceae;g__Alloscardovia;s__Alloscardovia omnicolens	SRS1101418	SRP064400	Canada	ftp://ftp.ebi.ac.uk/pub/databases/metagenomics/mgnify_genomes/human-gut/v1.0/all_genomes/MGYG-HGUT-031/MGYG-HGUT-03120/genomes1/GUT_GENOME244333.gff.gz	1
GUT_GENOME004246_00181	GUT_GENOME004246_00181	CCC80442.1	De-rhamnosylation	4	523	3	521	525	43.429	2.01e-152	455	99	3927081	389	14470	43.23	97.94	0.16	GUT_GENOME000004	d__Bacteria;p__Firmicutes_A;c__Clostridia;o__Lachnospirales;f__Lachnospiraceae;g__Blautia_A;s__Blautia_A sp900066165	ERS473192	ERP005989	Sweden	ftp://ftp.ebi.ac.uk/pub/databases/metagenomics/mgnify_genomes/human-gut/v1.0/all_genomes/MGYG-HGUT-000/MGYG-HGUT-00002/genomes1/GUT_GENOME004246.gff.gz	1
GUT_GENOME164583_00031	GUT_GENOME164583_00031	KEF27912.1	O-deglycosylation	4	809	5	810	812	59.729	0	981	99	1393424	170	10023	46.35	84.09	1.45	GUT_GENOME207408	d__Bacteria;p__Actinobacteriota;c__Actinobacteria;o__Actinomycetales;f__Bifidobacteriaceae;g__Alloscardovia;s__Alloscardovia omnicolens	SRS576120	SRP040146	United States	ftp://ftp.ebi.ac.uk/pub/databases/metagenomics/mgnify_genomes/human-gut/v1.0/all_genomes/MGYG-HGUT-031/MGYG-HGUT-03120/genomes1/GUT_GENOME164583.gff.gz	1
GUT_GENOME207408_00167	GUT_GENOME207408_00167	KEF27912.1	O-deglycosylation	4	809	16	821	812	59.606	0	978	99	1682492	65	42340	46.85	99.48	0.55	GUT_GENOME207408	d__Bacteria;p__Actinobacteriota;c__Actinobacteria;o__Actinomycetales;f__Bifidobacteriaceae;g__Alloscardovia;s__Alloscardovia omnicolens	SRS2455769	SRP114966	United States	ftp://ftp.ebi.ac.uk/pub/databases/metagenomics/mgnify_genomes/human-gut/v1.0/all_genomes/MGYG-HGUT-031/MGYG-HGUT-03120/genomes1/GUT_GENOME207408.gff.gz	1
GUT_GENOME165131_00914	GUT_GENOME164583_01102	KEF29323.1	O-deglycosylation	1	812	1	808	815	57.791	0	999	84	1393424	170	10023	46.35	84.09	1.45	GUT_GENOME207408	d__Bacteria;p__Actinobacteriota;c__Actinobacteria;o__Actinomycetales;f__Bifidobacteriaceae;g__Alloscardovia;s__Alloscardovia omnicolens	SRS576120	SRP040146	United States	ftp://ftp.ebi.ac.uk/pub/databases/metagenomics/mgnify_genomes/human-gut/v1.0/all_genomes/MGYG-HGUT-031/MGYG-HGUT-03120/genomes1/GUT_GENOME164583.gff.gz	5
GUT_GENOME004759_01284	GUT_GENOME004759_01284	QBM20342.1	De-rhamnosylation	1	887	1	887	895	54.637	0	1013	99	4271995	154	56442	42.64	97.76	0.32	GUT_GENOME000004	d__Bacteria;p__Firmicutes_A;c__Clostridia;o__Lachnospirales;f__Lachnospiraceae;g__Blautia_A;s__Blautia_A sp900066165	ERS473231	ERP005989	Sweden	ftp://ftp.ebi.ac.uk/pub/databases/metagenomics/mgnify_genomes/human-gut/v1.0/all_genomes/MGYG-HGUT-000/MGYG-HGUT-00002/genomes1/GUT_GENOME004759.gff.gz	2
GUT_GENOME005979_01607	GUT_GENOME005979_01607	CCC80442.1	De-rhamnosylation	4	523	3	521	525	43.238	9.69e-152	453	99	3537785	190	33603	43.29	93.33	0.63	GUT_GENOME000004	d__Bacteria;p__Firmicutes_A;c__Clostridia;o__Lachnospirales;f__Lachnospiraceae;g__Blautia_A;s__Blautia_A sp900066165	ERS473322	ERP005989	Sweden	ftp://ftp.ebi.ac.uk/pub/databases/metagenomics/mgnify_genomes/human-gut/v1.0/all_genomes/MGYG-HGUT-000/MGYG-HGUT-00002/genomes1/GUT_GENOME005979.gff.gz	1
GUT_GENOME156970_00065	GUT_GENOME156970_00065	KEF29323.1	O-deglycosylation	1	955	1	973	980	57.755	0	1103	99	1212688	256	5293	46.34	67.55	0.55	GUT_GENOME207408	d__Bacteria;p__Actinobacteriota;c__Actinobacteria;o__Actinomycetales;f__Bifidobacteriaceae;g__Alloscardovia;s__Alloscardovia omnicolens	ERS475391	ERP005860	China	ftp://ftp.ebi.ac.uk/pub/databases/metagenomics/mgnify_genomes/human-gut/v1.0/all_genomes/MGYG-HGUT-031/MGYG-HGUT-03120/genomes1/GUT_GENOME156970.gff.gz	1
GUT_GENOME006037_01934	GUT_GENOME006037_01934	CCC80442.1	De-rhamnosylation	60	523	17	481	469	45.842	4.28e-146	437	88	2393111	554	5041	43.85	71.78	1.17	GUT_GENOME000004	d__Bacteria;p__Firmicutes_A;c__Clostridia;o__Lachnospirales;f__Lachnospiraceae;g__Blautia_A;s__Blautia_A sp900066165	ERS473327	ERP005989	Sweden	ftp://ftp.ebi.ac.uk/pub/databases/metagenomics/mgnify_genomes/human-gut/v1.0/all_genomes/MGYG-HGUT-000/MGYG-HGUT-00002/genomes1/GUT_GENOME006037.gff.gz	1
GUT_GENOME165383_00428	GUT_GENOME164583_00032	KEF29323.1	O-deglycosylation	1	955	1	973	980	57.755	0	1103	99	1393424	170	10023	46.35	84.09	1.45	GUT_GENOME207408	d__Bacteria;p__Actinobacteriota;c__Actinobacteria;o__Actinomycetales;f__Bifidobacteriaceae;g__Alloscardovia;s__Alloscardovia omnicolens	SRS576120	SRP040146	United States	ftp://ftp.ebi.ac.uk/pub/databases/metagenomics/mgnify_genomes/human-gut/v1.0/all_genomes/MGYG-HGUT-031/MGYG-HGUT-03120/genomes1/GUT_GENOME164583.gff.gz	8
GUT_GENOME166462_00829	GUT_GENOME165131_00609	KEF29323.1	O-deglycosylation	1	955	1	973	980	57.755	0	1103	99	1459829	157	12655	46.58	88.08	1.46	GUT_GENOME207408	d__Bacteria;p__Actinobacteriota;c__Actinobacteria;o__Actinomycetales;f__Bifidobacteriaceae;g__Alloscardovia;s__Alloscardovia omnicolens	SRS576120	SRP040146	United States	ftp://ftp.ebi.ac.uk/pub/databases/metagenomics/mgnify_genomes/human-gut/v1.0/all_genomes/MGYG-HGUT-031/MGYG-HGUT-03120/genomes1/GUT_GENOME165131.gff.gz	4
GUT_GENOME010290_00857	GUT_GENOME010290_00857	CCC80442.1	De-rhamnosylation	16	524	6	509	514	41.634	1.16e-135	412	97	1917222	79	38034	43.82	59.24	0	GUT_GENOME000004	d__Bacteria;p__Firmicutes_A;c__Clostridia;o__Lachnospirales;f__Lachnospiraceae;g__Blautia_A;s__Blautia_A sp900066165	ERS554250	ERP007090	Sweden	ftp://ftp.ebi.ac.uk/pub/databases/metagenomics/mgnify_genomes/human-gut/v1.0/all_genomes/MGYG-HGUT-000/MGYG-HGUT-00002/genomes1/GUT_GENOME010290.gff.gz	1
GUT_GENOME207408_00166	GUT_GENOME207408_00166	KEF29323.1	O-deglycosylation	1	955	1	973	980	57.755	0	1104	99	1682492	65	42340	46.85	99.48	0.55	GUT_GENOME207408	d__Bacteria;p__Actinobacteriota;c__Actinobacteria;o__Actinomycetales;f__Bifidobacteriaceae;g__Alloscardovia;s__Alloscardovia omnicolens	SRS2455769	SRP114966	United States	ftp://ftp.ebi.ac.uk/pub/databases/metagenomics/mgnify_genomes/human-gut/v1.0/all_genomes/MGYG-HGUT-031/MGYG-HGUT-03120/genomes1/GUT_GENOME207408.gff.gz	1
GUT_GENOME010669_00161	GUT_GENOME010669_00161	CCC80440.1	De-rhamnosylation	9	632	6	677	672	42.708	0	582	96	4260181	376	19006	42.31	93.55	4.64	GUT_GENOME000004	d__Bacteria;p__Firmicutes_A;c__Clostridia;o__Lachnospirales;f__Lachnospiraceae;g__Blautia_A;s__Blautia_A sp900066165	ERS554258	ERP007090	Sweden	ftp://ftp.ebi.ac.uk/pub/databases/metagenomics/mgnify_genomes/human-gut/v1.0/all_genomes/MGYG-HGUT-000/MGYG-HGUT-00002/genomes1/GUT_GENOME010669.gff.gz	9
GUT_GENOME244333_00589	GUT_GENOME244333_00589	KEF29323.1	O-deglycosylation	1	955	1	973	980	57.653	0	1100	99	1505690	215	8744	46.28	87.36	1.06	GUT_GENOME207408	d__Bacteria;p__Actinobacteriota;c__Actinobacteria;o__Actinomycetales;f__Bifidobacteriaceae;g__Alloscardovia;s__Alloscardovia omnicolens	SRS1101418	SRP064400	Canada	ftp://ftp.ebi.ac.uk/pub/databases/metagenomics/mgnify_genomes/human-gut/v1.0/all_genomes/MGYG-HGUT-031/MGYG-HGUT-03120/genomes1/GUT_GENOME244333.gff.gz	1
GUT_GENOME010669_00836	GUT_GENOME010669_00836	CCC80442.1	De-rhamnosylation	4	523	3	521	525	43.238	7.97e-152	454	99	4260181	376	19006	42.31	93.55	4.64	GUT_GENOME000004	d__Bacteria;p__Firmicutes_A;c__Clostridia;o__Lachnospirales;f__Lachnospiraceae;g__Blautia_A;s__Blautia_A sp900066165	ERS554258	ERP007090	Sweden	ftp://ftp.ebi.ac.uk/pub/databases/metagenomics/mgnify_genomes/human-gut/v1.0/all_genomes/MGYG-HGUT-000/MGYG-HGUT-00002/genomes1/GUT_GENOME010669.gff.gz	1
GUT_GENOME165383_00175	GUT_GENOME156970_00354	KEF29323.1	O-deglycosylation	1	964	1	965	974	56.366	0	1142	100	1212688	256	5293	46.34	67.55	0.55	GUT_GENOME207408	d__Bacteria;p__Actinobacteriota;c__Actinobacteria;o__Actinomycetales;f__Bifidobacteriaceae;g__Alloscardovia;s__Alloscardovia omnicolens	ERS475391	ERP005860	China	ftp://ftp.ebi.ac.uk/pub/databases/metagenomics/mgnify_genomes/human-gut/v1.0/all_genomes/MGYG-HGUT-031/MGYG-HGUT-03120/genomes1/GUT_GENOME156970.gff.gz	8
GUT_GENOME010712_00426	GUT_GENOME193042_02488	ANI69961.1	O-demethylation	1	198	1	199	200	40.5	2.7e-43	154	94	3262180	388	10726	43.75	86.87	3.31	GUT_GENOME000004	d__Bacteria;p__Firmicutes_A;c__Clostridia;o__Lachnospirales;f__Lachnospiraceae;g__Blautia_A;s__Blautia_A sp900066165	SRS1820467	SRP093965	United States	ftp://ftp.ebi.ac.uk/pub/databases/metagenomics/mgnify_genomes/human-gut/v1.0/all_genomes/MGYG-HGUT-000/MGYG-HGUT-00002/genomes1/GUT_GENOME193042.gff.gz	1
GUT_GENOME166103_01088	GUT_GENOME165786_00914	KEF29323.1	O-deglycosylation	1	964	1	965	974	56.263	0	1140	100	1443295	156	12787	46.74	88.2	1.42	GUT_GENOME207408	d__Bacteria;p__Actinobacteriota;c__Actinobacteria;o__Actinomycetales;f__Bifidobacteriaceae;g__Alloscardovia;s__Alloscardovia omnicolens	SRS576120	SRP040146	United States	ftp://ftp.ebi.ac.uk/pub/databases/metagenomics/mgnify_genomes/human-gut/v1.0/all_genomes/MGYG-HGUT-031/MGYG-HGUT-03120/genomes1/GUT_GENOME165786.gff.gz	3
GUT_GENOME244333_00049	GUT_GENOME244333_00049	KEF29323.1	O-deglycosylation	1	958	1	973	981	55.352	0	1084	99	1505690	215	8744	46.28	87.36	1.06	GUT_GENOME207408	d__Bacteria;p__Actinobacteriota;c__Actinobacteria;o__Actinomycetales;f__Bifidobacteriaceae;g__Alloscardovia;s__Alloscardovia omnicolens	SRS1101418	SRP064400	Canada	ftp://ftp.ebi.ac.uk/pub/databases/metagenomics/mgnify_genomes/human-gut/v1.0/all_genomes/MGYG-HGUT-031/MGYG-HGUT-03120/genomes1/GUT_GENOME244333.gff.gz	1
GUT_GENOME010789_01006	GUT_GENOME010789_01006	CCC80442.1	De-rhamnosylation	4	523	3	521	525	43.048	2.24e-151	452	99	3940341	242	27826	42.77	94.3	0.02	GUT_GENOME000004	d__Bacteria;p__Firmicutes_A;c__Clostridia;o__Lachnospirales;f__Lachnospiraceae;g__Blautia_A;s__Blautia_A sp900066165	ERS554197	ERP007090	Sweden	ftp://ftp.ebi.ac.uk/pub/databases/metagenomics/mgnify_genomes/human-gut/v1.0/all_genomes/MGYG-HGUT-000/MGYG-HGUT-00002/genomes1/GUT_GENOME010789.gff.gz	1
GUT_GENOME165131_00569	GUT_GENOME165131_00569	KEF27912.1	O-deglycosylation	196	809	2	615	620	54.677	0	667	76	1459829	157	12655	46.58	88.08	1.46	GUT_GENOME207408	d__Bacteria;p__Actinobacteriota;c__Actinobacteria;o__Actinomycetales;f__Bifidobacteriaceae;g__Alloscardovia;s__Alloscardovia omnicolens	SRS576120	SRP040146	United States	ftp://ftp.ebi.ac.uk/pub/databases/metagenomics/mgnify_genomes/human-gut/v1.0/all_genomes/MGYG-HGUT-031/MGYG-HGUT-03120/genomes1/GUT_GENOME165131.gff.gz	1
GUT_GENOME018064_02353	GUT_GENOME004166_00338	BBG22493.1	C-deglyc (PUE)	1	367	14	370	367	54.496	1.07e-134	398	100	1920814	568	3673	44.26	57.95	0.63	GUT_GENOME000004	d__Bacteria;p__Firmicutes_A;c__Clostridia;o__Lachnospirales;f__Lachnospiraceae;g__Blautia_A;s__Blautia_A sp900066165	ERS473186	ERP005989	Sweden	ftp://ftp.ebi.ac.uk/pub/databases/metagenomics/mgnify_genomes/human-gut/v1.0/all_genomes/MGYG-HGUT-000/MGYG-HGUT-00002/genomes1/GUT_GENOME004166.gff.gz	3
GUT_GENOME244333_00047	GUT_GENOME244333_00047	AFS33105.1	O-deglycosylation	1	454	1	453	460	48.043	4.23e-142	424	99	1505690	215	8744	46.28	87.36	1.06	GUT_GENOME207408	d__Bacteria;p__Actinobacteriota;c__Actinobacteria;o__Actinomycetales;f__Bifidobacteriaceae;g__Alloscardovia;s__Alloscardovia omnicolens	SRS1101418	SRP064400	Canada	ftp://ftp.ebi.ac.uk/pub/databases/metagenomics/mgnify_genomes/human-gut/v1.0/all_genomes/MGYG-HGUT-031/MGYG-HGUT-03120/genomes1/GUT_GENOME244333.gff.gz	1
GUT_GENOME165131_00959	GUT_GENOME165131_00959	AFS33105.1	O-deglycosylation	1	454	1	453	460	47.826	1.81e-139	417	99	1459829	157	12655	46.58	88.08	1.46	GUT_GENOME207408	d__Bacteria;p__Actinobacteriota;c__Actinobacteria;o__Actinomycetales;f__Bifidobacteriaceae;g__Alloscardovia;s__Alloscardovia omnicolens	SRS576120	SRP040146	United States	ftp://ftp.ebi.ac.uk/pub/databases/metagenomics/mgnify_genomes/human-gut/v1.0/all_genomes/MGYG-HGUT-031/MGYG-HGUT-03120/genomes1/GUT_GENOME165131.gff.gz	3
GUT_GENOME022427_02502	GUT_GENOME022427_02502	CCC80442.1	De-rhamnosylation	4	523	3	521	525	42.857	1.08e-149	448	99	3208905	538	8138	43.12	83.47	1.9	GUT_GENOME000004	d__Bacteria;p__Firmicutes_A;c__Clostridia;o__Lachnospirales;f__Lachnospiraceae;g__Blautia_A;s__Blautia_A sp900066165	ERS1444481	ERP019502	Kazakhstan	ftp://ftp.ebi.ac.uk/pub/databases/metagenomics/mgnify_genomes/human-gut/v1.0/all_genomes/MGYG-HGUT-000/MGYG-HGUT-00002/genomes1/GUT_GENOME022427.gff.gz	2
GUT_GENOME027831_00037	GUT_GENOME027831_00037	AFS33105.1	O-deglycosylation	11	460	2	451	450	90.889	0	860	98	1896031	132	20709	57.68	89.44	2.61	GUT_GENOME027831	d__Bacteria;p__Actinobacteriota;c__Actinobacteria;o__Actinomycetales;f__Bifidobacteriaceae;g__Bifidobacterium;s__	DRS026633	DRP003048	Japan	ftp://ftp.ebi.ac.uk/pub/databases/metagenomics/mgnify_genomes/human-gut/v1.0/all_genomes/MGYG-HGUT-007/MGYG-HGUT-00775/genomes1/GUT_GENOME027831.gff.gz	1
GUT_GENOME027831_00840	GUT_GENOME027831_00840	KEF28001.1	O-deglycosylation	8	780	14	786	773	74.386	0	1231	99	1896031	132	20709	57.68	89.44	2.61	GUT_GENOME027831	d__Bacteria;p__Actinobacteriota;c__Actinobacteria;o__Actinomycetales;f__Bifidobacteriaceae;g__Bifidobacterium;s__	DRS026633	DRP003048	Japan	ftp://ftp.ebi.ac.uk/pub/databases/metagenomics/mgnify_genomes/human-gut/v1.0/all_genomes/MGYG-HGUT-007/MGYG-HGUT-00775/genomes1/GUT_GENOME027831.gff.gz	1
GUT_GENOME084769_00683	GUT_GENOME084743_01311	KEF28001.1	O-deglycosylation	1	780	8	787	780	99.872	0	1594	100	1986737	100	42506	59.34	99.78	1.15	GUT_GENOME142522	d__Bacteria;p__Actinobacteriota;c__Actinobacteria;o__Actinomycetales;f__Bifidobacteriaceae;g__Bifidobacterium;s__Bifidobacterium adolescentis	ERS537331	ERP006678	China	ftp://ftp.ebi.ac.uk/pub/databases/metagenomics/mgnify_genomes/human-gut/v1.0/all_genomes/MGYG-HGUT-023/MGYG-HGUT-02395/genomes4/GUT_GENOME084743.gff.gz	2
GUT_GENOME027759_00074	GUT_GENOME027759_00074	CCC80442.1	De-rhamnosylation	4	523	3	521	525	43.238	3.17e-151	452	99	1949136	350	6772	44.22	59.12	0.88	GUT_GENOME000004	d__Bacteria;p__Firmicutes_A;c__Clostridia;o__Lachnospirales;f__Lachnospiraceae;g__Blautia_A;s__Blautia_A sp900066165	DRS026603	DRP003048	Japan	ftp://ftp.ebi.ac.uk/pub/databases/metagenomics/mgnify_genomes/human-gut/v1.0/all_genomes/MGYG-HGUT-000/MGYG-HGUT-00002/genomes1/GUT_GENOME027759.gff.gz	1
GUT_GENOME027767_00604	GUT_GENOME027767_00604	ANI69962.1	O-demethylation	2	257	1	255	257	40.078	4.45e-56	203	94	2728197	121	37596	43.83	79.21	1.45	GUT_GENOME000004	d__Bacteria;p__Firmicutes_A;c__Clostridia;o__Lachnospirales;f__Lachnospiraceae;g__Blautia_A;s__Blautia_A sp900066165	DRS026605	DRP003048	Japan	ftp://ftp.ebi.ac.uk/pub/databases/metagenomics/mgnify_genomes/human-gut/v1.0/all_genomes/MGYG-HGUT-000/MGYG-HGUT-00002/genomes1/GUT_GENOME027767.gff.gz	1
GUT_GENOME030956_00969	GUT_GENOME030956_00969	KEF29323.1	O-deglycosylation	1	964	1	964	964	99.793	0	1975	100	1771483	149	17727	59.99	80.07	4.3	GUT_GENOME142522	d__Bacteria;p__Actinobacteriota;c__Actinobacteria;o__Actinomycetales;f__Bifidobacteriaceae;g__Bifidobacterium;s__Bifidobacterium adolescentis	ERS848710	ERP012177	China	ftp://ftp.ebi.ac.uk/pub/databases/metagenomics/mgnify_genomes/human-gut/v1.0/all_genomes/MGYG-HGUT-023/MGYG-HGUT-02395/genomes5/GUT_GENOME030956.gff.gz	1
GUT_GENOME063026_00759	GUT_GENOME063026_00759	KEF29323.1	O-deglycosylation	1	964	1	964	964	99.793	0	1976	100	1872334	98	33744	59.66	90.53	1.69	GUT_GENOME142522	d__Bacteria;p__Actinobacteriota;c__Actinobacteria;o__Actinomycetales;f__Bifidobacteriaceae;g__Bifidobacterium;s__Bifidobacterium adolescentis	ERS473422	ERP005989	Denmark	ftp://ftp.ebi.ac.uk/pub/databases/metagenomics/mgnify_genomes/human-gut/v1.0/all_genomes/MGYG-HGUT-023/MGYG-HGUT-02395/genomes5/GUT_GENOME063026.gff.gz	1
GUT_GENOME083955_00070	GUT_GENOME029332_00949	KEF27912.1	O-deglycosylation	1	809	1	809	809	99.753	0	1651	100	1371627	133	13882	59.53	64.91	1.75	GUT_GENOME142522	d__Bacteria;p__Actinobacteriota;c__Actinobacteria;o__Actinomycetales;f__Bifidobacteriaceae;g__Bifidobacterium;s__Bifidobacterium adolescentis	ERS848628	ERP012177	China	ftp://ftp.ebi.ac.uk/pub/databases/metagenomics/mgnify_genomes/human-gut/v1.0/all_genomes/MGYG-HGUT-023/MGYG-HGUT-02395/genomes1/GUT_GENOME029332.gff.gz	2
GUT_GENOME027988_01083	GUT_GENOME027988_01083	QBM20342.1	De-rhamnosylation	1	887	1	887	895	54.525	0	1010	99	3327155	286	17079	43.27	96.84	0.16	GUT_GENOME000004	d__Bacteria;p__Firmicutes_A;c__Clostridia;o__Lachnospirales;f__Lachnospiraceae;g__Blautia_A;s__Blautia_A sp900066165	DRS026395	DRP003048	Japan	ftp://ftp.ebi.ac.uk/pub/databases/metagenomics/mgnify_genomes/human-gut/v1.0/all_genomes/MGYG-HGUT-000/MGYG-HGUT-00002/genomes1/GUT_GENOME027988.gff.gz	1
GUT_GENOME027988_01371	GUT_GENOME027988_01371	ANI69962.1	O-demethylation	2	257	1	255	257	40.078	5.01e-56	203	94	3327155	286	17079	43.27	96.84	0.16	GUT_GENOME000004	d__Bacteria;p__Firmicutes_A;c__Clostridia;o__Lachnospirales;f__Lachnospiraceae;g__Blautia_A;s__Blautia_A sp900066165	DRS026395	DRP003048	Japan	ftp://ftp.ebi.ac.uk/pub/databases/metagenomics/mgnify_genomes/human-gut/v1.0/all_genomes/MGYG-HGUT-000/MGYG-HGUT-00002/genomes1/GUT_GENOME027988.gff.gz	1
GUT_GENOME028226_01885	GUT_GENOME005979_02494	BBG22493.1	C-deglyc (PUE)	1	367	1	357	367	51.771	2.68e-131	389	100	3537785	190	33603	43.29	93.33	0.63	GUT_GENOME000004	d__Bacteria;p__Firmicutes_A;c__Clostridia;o__Lachnospirales;f__Lachnospiraceae;g__Blautia_A;s__Blautia_A sp900066165	ERS473322	ERP005989	Sweden	ftp://ftp.ebi.ac.uk/pub/databases/metagenomics/mgnify_genomes/human-gut/v1.0/all_genomes/MGYG-HGUT-000/MGYG-HGUT-00002/genomes1/GUT_GENOME005979.gff.gz	7
GUT_GENOME029225_00125	GUT_GENOME029225_00125	CCC80440.1	De-rhamnosylation	9	628	6	675	670	43.284	0	586	95	3121419	144	34019	43.38	93.43	2.53	GUT_GENOME000004	d__Bacteria;p__Firmicutes_A;c__Clostridia;o__Lachnospirales;f__Lachnospiraceae;g__Blautia_A;s__Blautia_A sp900066165	ERS848621	ERP012177	China	ftp://ftp.ebi.ac.uk/pub/databases/metagenomics/mgnify_genomes/human-gut/v1.0/all_genomes/MGYG-HGUT-000/MGYG-HGUT-00002/genomes1/GUT_GENOME029225.gff.gz	5
GUT_GENOME029332_00885	GUT_GENOME029332_00885	KEF29323.1	O-deglycosylation	1	964	1	964	964	99.689	0	1972	100	1371627	133	13882	59.53	64.91	1.75	GUT_GENOME142522	d__Bacteria;p__Actinobacteriota;c__Actinobacteria;o__Actinomycetales;f__Bifidobacteriaceae;g__Bifidobacterium;s__Bifidobacterium adolescentis	ERS848628	ERP012177	China	ftp://ftp.ebi.ac.uk/pub/databases/metagenomics/mgnify_genomes/human-gut/v1.0/all_genomes/MGYG-HGUT-023/MGYG-HGUT-02395/genomes1/GUT_GENOME029332.gff.gz	1
GUT_GENOME031520_00885	GUT_GENOME031520_00885	ANI69962.1	O-demethylation	2	257	1	255	257	40.078	5.06e-56	203	94	2930520	252	17778	43.65	85.2	2.08	GUT_GENOME000004	d__Bacteria;p__Firmicutes_A;c__Clostridia;o__Lachnospirales;f__Lachnospiraceae;g__Blautia_A;s__Blautia_A sp900066165	ERS848742	ERP012177	China	ftp://ftp.ebi.ac.uk/pub/databases/metagenomics/mgnify_genomes/human-gut/v1.0/all_genomes/MGYG-HGUT-000/MGYG-HGUT-00002/genomes1/GUT_GENOME031520.gff.gz	1
GUT_GENOME032977_01240	GUT_GENOME065475_00463	QBM20340.1	De-rhamnosylation	2	809	1	808	822	40.146	0	609	97	3325756	361	12567	43.36	83.17	2.53	GUT_GENOME000004	d__Bacteria;p__Firmicutes_A;c__Clostridia;o__Lachnospirales;f__Lachnospiraceae;g__Blautia_A;s__Blautia_A sp900066165	ERS608584	ERP008729	Austria	ftp://ftp.ebi.ac.uk/pub/databases/metagenomics/mgnify_genomes/human-gut/v1.0/all_genomes/MGYG-HGUT-000/MGYG-HGUT-00002/genomes1/GUT_GENOME065475.gff.gz	2
GUT_GENOME261653_00803	GUT_GENOME261653_00803	KEF29323.1	O-deglycosylation	1	964	1	964	964	99.689	0	1972	100	1138320	42	48923	57.59	60.53	0	GUT_GENOME142522	d__Bacteria;p__Actinobacteriota;c__Actinobacteria;o__Actinomycetales;f__Bifidobacteriaceae;g__Bifidobacterium;s__Bifidobacterium adolescentis	NA	NA	China	ftp://ftp.ebi.ac.uk/pub/databases/metagenomics/mgnify_genomes/human-gut/v1.0/all_genomes/MGYG-HGUT-023/MGYG-HGUT-02395/genomes3/GUT_GENOME261653.gff.gz	1
GUT_GENOME035102_01382	GUT_GENOME000004_00777	CCC80442.1	De-rhamnosylation	4	523	3	521	525	42.857	9.18e-150	448	99	4434075	100	109266	42.6	99.37	0	GUT_GENOME000004	d__Bacteria;p__Firmicutes_A;c__Clostridia;o__Lachnospirales;f__Lachnospiraceae;g__Blautia_A;s__Blautia_A sp900066165	ERS370064	ERP105624	United Kingdom	ftp://ftp.ebi.ac.uk/pub/databases/metagenomics/mgnify_genomes/human-gut/v1.0/all_genomes/MGYG-HGUT-000/MGYG-HGUT-00002/genomes1/GUT_GENOME000004.gff.gz	23
GUT_GENOME269845_01282	GUT_GENOME269845_01282	KEF29323.1	O-deglycosylation	1	964	1	964	964	99.689	0	1974	100	1643216	66	77332	60.18	76.59	0.45	GUT_GENOME142522	d__Bacteria;p__Actinobacteriota;c__Actinobacteria;o__Actinomycetales;f__Bifidobacteriaceae;g__Bifidobacterium;s__Bifidobacterium adolescentis	ERS971922	ERP012929	Israel	ftp://ftp.ebi.ac.uk/pub/databases/metagenomics/mgnify_genomes/human-gut/v1.0/all_genomes/MGYG-HGUT-023/MGYG-HGUT-02395/genomes3/GUT_GENOME269845.gff.gz	1
GUT_GENOME091216_00207	GUT_GENOME062561_00094	KEF28010.1	O-deglycosylation	1	748	1	748	748	99.599	0	1539	100	1232778	243	5821	60.03	66.79	1.14	GUT_GENOME142522	d__Bacteria;p__Actinobacteriota;c__Actinobacteria;o__Actinomycetales;f__Bifidobacteriaceae;g__Bifidobacterium;s__Bifidobacterium adolescentis	ERS473386	ERP005989	Denmark	ftp://ftp.ebi.ac.uk/pub/databases/metagenomics/mgnify_genomes/human-gut/v1.0/all_genomes/MGYG-HGUT-023/MGYG-HGUT-02395/genomes4/GUT_GENOME062561.gff.gz	2
GUT_GENOME196602_00946	GUT_GENOME196602_00946	KEF28010.1	O-deglycosylation	185	748	7	570	564	99.468	0	1153	75	1654908	294	6686	59.34	79.27	4.05	GUT_GENOME142522	d__Bacteria;p__Actinobacteriota;c__Actinobacteria;o__Actinomycetales;f__Bifidobacteriaceae;g__Bifidobacterium;s__Bifidobacterium adolescentis	SRS1876386	SRP095580	Netherlands	ftp://ftp.ebi.ac.uk/pub/databases/metagenomics/mgnify_genomes/human-gut/v1.0/all_genomes/MGYG-HGUT-023/MGYG-HGUT-02395/genomes1/GUT_GENOME196602.gff.gz	1
GUT_GENOME108103_00352	GUT_GENOME108103_00352	KEF28010.1	O-deglycosylation	1	748	1	748	748	99.465	0	1537	100	1820432	276	8272	59.35	86.87	0.87	GUT_GENOME142522	d__Bacteria;p__Actinobacteriota;c__Actinobacteria;o__Actinomycetales;f__Bifidobacteriaceae;g__Bifidobacterium;s__Bifidobacterium adolescentis	ERS328755	ERP003612	Denmark	ftp://ftp.ebi.ac.uk/pub/databases/metagenomics/mgnify_genomes/human-gut/v1.0/all_genomes/MGYG-HGUT-023/MGYG-HGUT-02395/genomes5/GUT_GENOME108103.gff.gz	1
GUT_GENOME035978_00302	GUT_GENOME035978_00302	ANI69962.1	O-demethylation	2	257	1	255	257	40.078	5.06e-56	203	94	1670524	90	26809	44.13	56.9	0.16	GUT_GENOME000004	d__Bacteria;p__Firmicutes_A;c__Clostridia;o__Lachnospirales;f__Lachnospiraceae;g__Blautia_A;s__Blautia_A sp900066165	ERS1015949	ERP013563	China	ftp://ftp.ebi.ac.uk/pub/databases/metagenomics/mgnify_genomes/human-gut/v1.0/all_genomes/MGYG-HGUT-000/MGYG-HGUT-00002/genomes1/GUT_GENOME035978.gff.gz	1
GUT_GENOME136670_00675	GUT_GENOME136670_00675	KEF28010.1	O-deglycosylation	1	748	1	748	748	99.465	0	1537	100	1942181	61	47851	59.79	96.86	0.15	GUT_GENOME142522	d__Bacteria;p__Actinobacteriota;c__Actinobacteria;o__Actinomycetales;f__Bifidobacteriaceae;g__Bifidobacterium;s__Bifidobacterium adolescentis	ERS199292	ERP002061	Spain	ftp://ftp.ebi.ac.uk/pub/databases/metagenomics/mgnify_genomes/human-gut/v1.0/all_genomes/MGYG-HGUT-023/MGYG-HGUT-02395/genomes4/GUT_GENOME136670.gff.gz	1
GUT_GENOME035978_00852	GUT_GENOME035978_00852	QBM20342.1	De-rhamnosylation	1	887	1	887	895	54.637	0	1014	99	1670524	90	26809	44.13	56.9	0.16	GUT_GENOME000004	d__Bacteria;p__Firmicutes_A;c__Clostridia;o__Lachnospirales;f__Lachnospiraceae;g__Blautia_A;s__Blautia_A sp900066165	ERS1015949	ERP013563	China	ftp://ftp.ebi.ac.uk/pub/databases/metagenomics/mgnify_genomes/human-gut/v1.0/all_genomes/MGYG-HGUT-000/MGYG-HGUT-00002/genomes1/GUT_GENOME035978.gff.gz	1
GUT_GENOME221009_00950	GUT_GENOME221009_00950	KEF28010.1	O-deglycosylation	1	748	1	748	748	99.465	0	1536	100	1823682	296	6869	59.62	78.96	3.27	GUT_GENOME142522	d__Bacteria;p__Actinobacteriota;c__Actinobacteria;o__Actinomycetales;f__Bifidobacteriaceae;g__Bifidobacterium;s__Bifidobacterium adolescentis	SRS1596817	SRP080787	Mongolia	ftp://ftp.ebi.ac.uk/pub/databases/metagenomics/mgnify_genomes/human-gut/v1.0/all_genomes/MGYG-HGUT-023/MGYG-HGUT-02395/genomes2/GUT_GENOME221009.gff.gz	1
GUT_GENOME279161_01260	GUT_GENOME279161_01260	KEF28010.1	O-deglycosylation	1	748	1	748	748	99.465	0	1537	100	1798909	194	13853	60.01	97.73	0.85	GUT_GENOME142522	d__Bacteria;p__Actinobacteriota;c__Actinobacteria;o__Actinomycetales;f__Bifidobacteriaceae;g__Bifidobacterium;s__Bifidobacterium adolescentis	ERS971712	ERP012929	Israel	ftp://ftp.ebi.ac.uk/pub/databases/metagenomics/mgnify_genomes/human-gut/v1.0/all_genomes/MGYG-HGUT-023/MGYG-HGUT-02395/genomes3/GUT_GENOME279161.gff.gz	1
GUT_GENOME283592_01295	GUT_GENOME283592_01295	KEF28010.1	O-deglycosylation	1	748	1	748	748	99.465	0	1537	100	2116764	182	19147	59.48	96.82	3.3	GUT_GENOME142522	d__Bacteria;p__Actinobacteriota;c__Actinobacteria;o__Actinomycetales;f__Bifidobacteriaceae;g__Bifidobacterium;s__Bifidobacterium adolescentis	ERS436662	ERP005534	France	ftp://ftp.ebi.ac.uk/pub/databases/metagenomics/mgnify_genomes/human-gut/v1.0/all_genomes/MGYG-HGUT-023/MGYG-HGUT-02395/genomes1/GUT_GENOME283592.gff.gz	1
GUT_GENOME160875_00767	GUT_GENOME160875_00767	KEF28010.1	O-deglycosylation	93	748	1	656	656	99.39	0	1345	88	1376649	409	3598	59.51	70.32	1.79	GUT_GENOME142522	d__Bacteria;p__Actinobacteriota;c__Actinobacteria;o__Actinomycetales;f__Bifidobacteriaceae;g__Bifidobacterium;s__Bifidobacterium adolescentis	SRS1876386	SRP095580	Netherlands	ftp://ftp.ebi.ac.uk/pub/databases/metagenomics/mgnify_genomes/human-gut/v1.0/all_genomes/MGYG-HGUT-023/MGYG-HGUT-02395/genomes4/GUT_GENOME160875.gff.gz	1
GUT_GENOME043692_00961	GUT_GENOME043692_00961	CCC80442.1	De-rhamnosylation	4	523	3	521	525	43.238	7.97e-152	454	99	3339587	142	38640	43.26	85.22	3.8	GUT_GENOME000004	d__Bacteria;p__Firmicutes_A;c__Clostridia;o__Lachnospirales;f__Lachnospiraceae;g__Blautia_A;s__Blautia_A sp900066165	ERS1076033	ERP014480	Denmark	ftp://ftp.ebi.ac.uk/pub/databases/metagenomics/mgnify_genomes/human-gut/v1.0/all_genomes/MGYG-HGUT-000/MGYG-HGUT-00002/genomes1/GUT_GENOME043692.gff.gz	1
GUT_GENOME284631_00974	GUT_GENOME284631_00974	KEF28010.1	O-deglycosylation	93	748	1	656	656	99.39	0	1347	88	1913724	294	9569	59.6	85.09	4.21	GUT_GENOME142522	d__Bacteria;p__Actinobacteriota;c__Actinobacteria;o__Actinomycetales;f__Bifidobacteriaceae;g__Bifidobacterium;s__Bifidobacterium adolescentis	ERS436734	ERP005534	France	ftp://ftp.ebi.ac.uk/pub/databases/metagenomics/mgnify_genomes/human-gut/v1.0/all_genomes/MGYG-HGUT-023/MGYG-HGUT-02395/genomes4/GUT_GENOME284631.gff.gz	1
GUT_GENOME043692_01761	GUT_GENOME043692_01761	ANI69962.1	O-demethylation	2	257	1	255	257	40.078	1.01e-55	202	94	3339587	142	38640	43.26	85.22	3.8	GUT_GENOME000004	d__Bacteria;p__Firmicutes_A;c__Clostridia;o__Lachnospirales;f__Lachnospiraceae;g__Blautia_A;s__Blautia_A sp900066165	ERS1076033	ERP014480	Denmark	ftp://ftp.ebi.ac.uk/pub/databases/metagenomics/mgnify_genomes/human-gut/v1.0/all_genomes/MGYG-HGUT-000/MGYG-HGUT-00002/genomes1/GUT_GENOME043692.gff.gz	1
GUT_GENOME043757_01666	GUT_GENOME245127_02085	CCC80442.1	De-rhamnosylation	69	524	26	482	460	43.043	2.86e-134	407	87	3002210	299	15512	43.62	84.44	0.95	GUT_GENOME000004	d__Bacteria;p__Firmicutes_A;c__Clostridia;o__Lachnospirales;f__Lachnospiraceae;g__Blautia_A;s__Blautia_A sp900066165	ERS1066637	ERP013933	United States	ftp://ftp.ebi.ac.uk/pub/databases/metagenomics/mgnify_genomes/human-gut/v1.0/all_genomes/MGYG-HGUT-000/MGYG-HGUT-00002/genomes1/GUT_GENOME245127.gff.gz	1
GUT_GENOME063407_00444	GUT_GENOME085705_01513	KEF27912.1	O-deglycosylation	1	809	1	809	809	99.382	0	1647	100	1732271	577	3847	59.78	86.05	3.08	GUT_GENOME142522	d__Bacteria;p__Actinobacteriota;c__Actinobacteria;o__Actinomycetales;f__Bifidobacteriaceae;g__Bifidobacterium;s__Bifidobacterium adolescentis	ERS537364	ERP006678	China	ftp://ftp.ebi.ac.uk/pub/databases/metagenomics/mgnify_genomes/human-gut/v1.0/all_genomes/MGYG-HGUT-023/MGYG-HGUT-02395/genomes2/GUT_GENOME085705.gff.gz	1
GUT_GENOME239784_01747	GUT_GENOME239783_01731	KEF27912.1	O-deglycosylation	1	809	1	809	809	99.382	0	1645	100	2150457	21	299387	59.14	100	0	GUT_GENOME142522	d__Bacteria;p__Actinobacteriota;c__Actinobacteria;o__Actinomycetales;f__Bifidobacteriaceae;g__Bifidobacterium;s__Bifidobacterium adolescentis	SAMN09736994	PRJNA482748	China	ftp://ftp.ebi.ac.uk/pub/databases/metagenomics/mgnify_genomes/human-gut/v1.0/all_genomes/MGYG-HGUT-023/MGYG-HGUT-02395/genomes5/GUT_GENOME239783.gff.gz	2
GUT_GENOME044855_00254	GUT_GENOME044855_00254	QBM20342.1	De-rhamnosylation	1	887	1	887	895	54.637	0	1011	99	3264845	239	20195	43.46	80.18	4.09	GUT_GENOME000004	d__Bacteria;p__Firmicutes_A;c__Clostridia;o__Lachnospirales;f__Lachnospiraceae;g__Blautia_A;s__Blautia_A sp900066165	ERS1289695	ERP016813	China	ftp://ftp.ebi.ac.uk/pub/databases/metagenomics/mgnify_genomes/human-gut/v1.0/all_genomes/MGYG-HGUT-000/MGYG-HGUT-00002/genomes1/GUT_GENOME044855.gff.gz	5
GUT_GENOME068542_01024	GUT_GENOME068542_01024	KEF28010.1	O-deglycosylation	1	639	1	639	639	99.374	0	1312	85	1309909	641	2144	59.49	59.44	1.36	GUT_GENOME142522	d__Bacteria;p__Actinobacteriota;c__Actinobacteria;o__Actinomycetales;f__Bifidobacteriaceae;g__Bifidobacterium;s__Bifidobacterium adolescentis	ERS235625	ERP002469	Sweden	ftp://ftp.ebi.ac.uk/pub/databases/metagenomics/mgnify_genomes/human-gut/v1.0/all_genomes/MGYG-HGUT-023/MGYG-HGUT-02395/genomes2/GUT_GENOME068542.gff.gz	1
GUT_GENOME066750_01750	GUT_GENOME066750_01750	KEF28010.1	O-deglycosylation	1	748	1	748	748	99.332	0	1534	100	2298223	219	21414	59.75	98.75	3.52	GUT_GENOME142522	d__Bacteria;p__Actinobacteriota;c__Actinobacteria;o__Actinomycetales;f__Bifidobacteriaceae;g__Bifidobacterium;s__Bifidobacterium adolescentis	ERS235532	ERP002469	Sweden	ftp://ftp.ebi.ac.uk/pub/databases/metagenomics/mgnify_genomes/human-gut/v1.0/all_genomes/MGYG-HGUT-023/MGYG-HGUT-02395/genomes2/GUT_GENOME066750.gff.gz	1
GUT_GENOME089295_00169	GUT_GENOME003698_00281	KEF28010.1	O-deglycosylation	1	748	1	748	748	99.332	0	1533	100	1808449	236	10511	59.52	86.63	2.05	GUT_GENOME142522	d__Bacteria;p__Actinobacteriota;c__Actinobacteria;o__Actinomycetales;f__Bifidobacteriaceae;g__Bifidobacterium;s__Bifidobacterium adolescentis	ERS473152	ERP005989	Sweden	ftp://ftp.ebi.ac.uk/pub/databases/metagenomics/mgnify_genomes/human-gut/v1.0/all_genomes/MGYG-HGUT-023/MGYG-HGUT-02395/genomes2/GUT_GENOME003698.gff.gz	53
GUT_GENOME090617_01579	GUT_GENOME090617_01579	KEF28010.1	O-deglycosylation	1	748	1	748	748	99.332	0	1534	100	1960227	135	31943	59.56	97.42	0.15	GUT_GENOME142522	d__Bacteria;p__Actinobacteriota;c__Actinobacteria;o__Actinomycetales;f__Bifidobacteriaceae;g__Bifidobacterium;s__Bifidobacterium adolescentis	ERS608618	ERP008729	Austria	ftp://ftp.ebi.ac.uk/pub/databases/metagenomics/mgnify_genomes/human-gut/v1.0/all_genomes/MGYG-HGUT-023/MGYG-HGUT-02395/genomes2/GUT_GENOME090617.gff.gz	1
GUT_GENOME160797_00777	GUT_GENOME160797_00777	KEF28010.1	O-deglycosylation	1	748	1	748	748	99.332	0	1534	100	2005412	64	74896	59.61	97.27	0.3	GUT_GENOME142522	d__Bacteria;p__Actinobacteriota;c__Actinobacteria;o__Actinomycetales;f__Bifidobacteriaceae;g__Bifidobacterium;s__Bifidobacterium adolescentis	SRS1876416	SRP095580	Netherlands	ftp://ftp.ebi.ac.uk/pub/databases/metagenomics/mgnify_genomes/human-gut/v1.0/all_genomes/MGYG-HGUT-023/MGYG-HGUT-02395/genomes3/GUT_GENOME160797.gff.gz	1
GUT_GENOME161292_00221	GUT_GENOME161292_00221	KEF28010.1	O-deglycosylation	1	748	1	748	748	99.332	0	1536	100	1345697	426	3325	59.34	66.17	0.51	GUT_GENOME142522	d__Bacteria;p__Actinobacteriota;c__Actinobacteria;o__Actinomycetales;f__Bifidobacteriaceae;g__Bifidobacterium;s__Bifidobacterium adolescentis	SRS1876573	SRP095580	Netherlands	ftp://ftp.ebi.ac.uk/pub/databases/metagenomics/mgnify_genomes/human-gut/v1.0/all_genomes/MGYG-HGUT-023/MGYG-HGUT-02395/genomes4/GUT_GENOME161292.gff.gz	1
GUT_GENOME046677_02134	GUT_GENOME046677_02134	ANI69962.1	O-demethylation	2	257	1	255	257	40.078	5.16e-56	203	94	3857983	200	35618	42.88	96.76	0.29	GUT_GENOME000004	d__Bacteria;p__Firmicutes_A;c__Clostridia;o__Lachnospirales;f__Lachnospiraceae;g__Blautia_A;s__Blautia_A sp900066165	ERS1343397	ERP017091	China	ftp://ftp.ebi.ac.uk/pub/databases/metagenomics/mgnify_genomes/human-gut/v1.0/all_genomes/MGYG-HGUT-000/MGYG-HGUT-00002/genomes1/GUT_GENOME046677.gff.gz	1
GUT_GENOME196404_00012	GUT_GENOME116613_00355	KEF28010.1	O-deglycosylation	1	748	1	748	748	99.332	0	1537	100	1965976	120	26230	59.41	96.83	0.38	GUT_GENOME142522	d__Bacteria;p__Actinobacteriota;c__Actinobacteria;o__Actinomycetales;f__Bifidobacteriaceae;g__Bifidobacterium;s__Bifidobacterium adolescentis	ERS396352	ERP004605	Denmark	ftp://ftp.ebi.ac.uk/pub/databases/metagenomics/mgnify_genomes/human-gut/v1.0/all_genomes/MGYG-HGUT-023/MGYG-HGUT-02395/genomes2/GUT_GENOME116613.gff.gz	1
GUT_GENOME047130_00277	GUT_GENOME035102_00654	ANI69962.1	O-demethylation	2	257	1	255	257	40.078	5.59e-56	203	94	3779931	222	26853	42.8	93.75	4.75	GUT_GENOME000004	d__Bacteria;p__Firmicutes_A;c__Clostridia;o__Lachnospirales;f__Lachnospiraceae;g__Blautia_A;s__Blautia_A sp900066165	ERS1015903	ERP013563	China	ftp://ftp.ebi.ac.uk/pub/databases/metagenomics/mgnify_genomes/human-gut/v1.0/all_genomes/MGYG-HGUT-000/MGYG-HGUT-00002/genomes1/GUT_GENOME035102.gff.gz	3
GUT_GENOME196721_00825	GUT_GENOME196721_00825	KEF28010.1	O-deglycosylation	1	748	1	748	748	99.332	0	1534	100	1336456	42	59397	58.92	57.89	0	GUT_GENOME142522	d__Bacteria;p__Actinobacteriota;c__Actinobacteria;o__Actinomycetales;f__Bifidobacteriaceae;g__Bifidobacterium;s__Bifidobacterium adolescentis	SRS1876416	SRP095580	Netherlands	ftp://ftp.ebi.ac.uk/pub/databases/metagenomics/mgnify_genomes/human-gut/v1.0/all_genomes/MGYG-HGUT-023/MGYG-HGUT-02395/genomes5/GUT_GENOME196721.gff.gz	1
GUT_GENOME049590_01594	GUT_GENOME049590_01594	ANI69961.1	O-demethylation	13	208	75	271	197	46.701	1.4e-51	187	93	2784494	226	17269	43.67	80.1	3.16	GUT_GENOME000004	d__Bacteria;p__Firmicutes_A;c__Clostridia;o__Lachnospirales;f__Lachnospiraceae;g__Blautia_A;s__Blautia_A sp900066165	ERS1282032	ERP022699	United Kingdom	ftp://ftp.ebi.ac.uk/pub/databases/metagenomics/mgnify_genomes/human-gut/v1.0/all_genomes/MGYG-HGUT-000/MGYG-HGUT-00002/genomes1/GUT_GENOME049590.gff.gz	1
GUT_GENOME049590_01636	GUT_GENOME049590_01636	CCC80442.1	De-rhamnosylation	4	523	3	521	525	42.857	2.28e-149	447	99	2784494	226	17269	43.67	80.1	3.16	GUT_GENOME000004	d__Bacteria;p__Firmicutes_A;c__Clostridia;o__Lachnospirales;f__Lachnospiraceae;g__Blautia_A;s__Blautia_A sp900066165	ERS1282032	ERP022699	United Kingdom	ftp://ftp.ebi.ac.uk/pub/databases/metagenomics/mgnify_genomes/human-gut/v1.0/all_genomes/MGYG-HGUT-000/MGYG-HGUT-00002/genomes1/GUT_GENOME049590.gff.gz	1
GUT_GENOME218034_01135	GUT_GENOME218034_01135	KEF28010.1	O-deglycosylation	41	748	1	708	708	99.294	0	1452	95	2124624	379	9037	60.42	97.11	3.52	GUT_GENOME142522	d__Bacteria;p__Actinobacteriota;c__Actinobacteria;o__Actinomycetales;f__Bifidobacteriaceae;g__Bifidobacterium;s__Bifidobacterium adolescentis	SRS1170705	SRP066479	Peru	ftp://ftp.ebi.ac.uk/pub/databases/metagenomics/mgnify_genomes/human-gut/v1.0/all_genomes/MGYG-HGUT-023/MGYG-HGUT-02395/genomes2/GUT_GENOME218034.gff.gz	1
GUT_GENOME105842_00396	GUT_GENOME067225_01558	KEF28010.1	O-deglycosylation	93	748	1	656	656	99.238	0	1343	88	1825685	590	3762	59.28	83.83	1.85	GUT_GENOME142522	d__Bacteria;p__Actinobacteriota;c__Actinobacteria;o__Actinomycetales;f__Bifidobacteriaceae;g__Bifidobacterium;s__Bifidobacterium adolescentis	ERS235551	ERP002469	Sweden	ftp://ftp.ebi.ac.uk/pub/databases/metagenomics/mgnify_genomes/human-gut/v1.0/all_genomes/MGYG-HGUT-023/MGYG-HGUT-02395/genomes5/GUT_GENOME067225.gff.gz	3
GUT_GENOME050024_03279	GUT_GENOME050024_03279	ANI69961.1	O-demethylation	5	209	234	436	206	41.262	8.73e-44	161	97	4307821	176	47481	42.59	99.37	2.53	GUT_GENOME000004	d__Bacteria;p__Firmicutes_A;c__Clostridia;o__Lachnospirales;f__Lachnospiraceae;g__Blautia_A;s__Blautia_A sp900066165	ERS1487589	ERP020710	China	ftp://ftp.ebi.ac.uk/pub/databases/metagenomics/mgnify_genomes/human-gut/v1.0/all_genomes/MGYG-HGUT-000/MGYG-HGUT-00002/genomes1/GUT_GENOME050024.gff.gz	1
GUT_GENOME047515_00934	GUT_GENOME047515_00934	KEF28010.1	O-deglycosylation	1	748	1	748	748	99.198	0	1533	100	1817474	43	74363	59.58	87.12	1.23	GUT_GENOME142522	d__Bacteria;p__Actinobacteriota;c__Actinobacteria;o__Actinomycetales;f__Bifidobacteriaceae;g__Bifidobacterium;s__Bifidobacterium adolescentis	ERS1647282	ERP019674	Germany	ftp://ftp.ebi.ac.uk/pub/databases/metagenomics/mgnify_genomes/human-gut/v1.0/all_genomes/MGYG-HGUT-023/MGYG-HGUT-02395/genomes4/GUT_GENOME047515.gff.gz	1
GUT_GENOME066305_00684	GUT_GENOME007198_01163	KEF28010.1	O-deglycosylation	1	748	1	748	748	99.198	0	1531	100	1882697	128	21243	59.88	92.28	1.63	GUT_GENOME142522	d__Bacteria;p__Actinobacteriota;c__Actinobacteria;o__Actinomycetales;f__Bifidobacteriaceae;g__Bifidobacterium;s__Bifidobacterium adolescentis	ERS473409	ERP005989	Sweden	ftp://ftp.ebi.ac.uk/pub/databases/metagenomics/mgnify_genomes/human-gut/v1.0/all_genomes/MGYG-HGUT-023/MGYG-HGUT-02395/genomes5/GUT_GENOME007198.gff.gz	19
GUT_GENOME073898_00767	GUT_GENOME073898_00767	KEF28010.1	O-deglycosylation	1	748	1	748	748	99.198	0	1531	100	2075841	98	34411	59.6	99.09	0.91	GUT_GENOME142522	d__Bacteria;p__Actinobacteriota;c__Actinobacteria;o__Actinomycetales;f__Bifidobacteriaceae;g__Bifidobacterium;s__Bifidobacterium adolescentis	ERS396489	ERP004605	Spain	ftp://ftp.ebi.ac.uk/pub/databases/metagenomics/mgnify_genomes/human-gut/v1.0/all_genomes/MGYG-HGUT-023/MGYG-HGUT-02395/genomes3/GUT_GENOME073898.gff.gz	1
GUT_GENOME087964_01951	GUT_GENOME087964_01951	KEF28010.1	O-deglycosylation	1	748	1	748	748	99.198	0	1533	100	2311182	238	15922	58.82	96.9	1.2	GUT_GENOME142522	d__Bacteria;p__Actinobacteriota;c__Actinobacteria;o__Actinomycetales;f__Bifidobacteriaceae;g__Bifidobacterium;s__Bifidobacterium adolescentis	ERS608517	ERP008729	Austria	ftp://ftp.ebi.ac.uk/pub/databases/metagenomics/mgnify_genomes/human-gut/v1.0/all_genomes/MGYG-HGUT-023/MGYG-HGUT-02395/genomes5/GUT_GENOME087964.gff.gz	1
GUT_GENOME090394_01835	GUT_GENOME065112_00551	KEF28010.1	O-deglycosylation	1	748	1	748	748	99.198	0	1533	100	1375414	32	59031	59.8	58.9	0	GUT_GENOME142522	d__Bacteria;p__Actinobacteriota;c__Actinobacteria;o__Actinomycetales;f__Bifidobacteriaceae;g__Bifidobacterium;s__Bifidobacterium adolescentis	ERS608609	ERP008729	Austria	ftp://ftp.ebi.ac.uk/pub/databases/metagenomics/mgnify_genomes/human-gut/v1.0/all_genomes/MGYG-HGUT-023/MGYG-HGUT-02395/genomes2/GUT_GENOME065112.gff.gz	3
GUT_GENOME057125_00565	GUT_GENOME057125_00565	CCC80442.1	De-rhamnosylation	4	523	3	521	525	43.048	2.81e-150	449	99	3440143	168	33685	43.24	87.57	2.85	GUT_GENOME000004	d__Bacteria;p__Firmicutes_A;c__Clostridia;o__Lachnospirales;f__Lachnospiraceae;g__Blautia_A;s__Blautia_A sp900066165	ERS396403	ERP004605	Spain	ftp://ftp.ebi.ac.uk/pub/databases/metagenomics/mgnify_genomes/human-gut/v1.0/all_genomes/MGYG-HGUT-000/MGYG-HGUT-00002/genomes1/GUT_GENOME057125.gff.gz	1
GUT_GENOME057575_02414	GUT_GENOME057575_02414	ANI69961.1	O-demethylation	13	210	152	349	199	47.236	2.71e-51	187	94	3415837	309	16444	43.12	93.74	3.16	GUT_GENOME000004	d__Bacteria;p__Firmicutes_A;c__Clostridia;o__Lachnospirales;f__Lachnospiraceae;g__Blautia_A;s__Blautia_A sp900066165	ERS396479	ERP004605	Spain	ftp://ftp.ebi.ac.uk/pub/databases/metagenomics/mgnify_genomes/human-gut/v1.0/all_genomes/MGYG-HGUT-000/MGYG-HGUT-00002/genomes1/GUT_GENOME057575.gff.gz	1
GUT_GENOME057603_00124	GUT_GENOME057603_00124	ANI69962.1	O-demethylation	2	257	1	255	257	40.078	5.81e-56	203	94	3282324	254	18725	43.21	92.78	2.96	GUT_GENOME000004	d__Bacteria;p__Firmicutes_A;c__Clostridia;o__Lachnospirales;f__Lachnospiraceae;g__Blautia_A;s__Blautia_A sp900066165	ERS396479	ERP004605	Spain	ftp://ftp.ebi.ac.uk/pub/databases/metagenomics/mgnify_genomes/human-gut/v1.0/all_genomes/MGYG-HGUT-000/MGYG-HGUT-00002/genomes1/GUT_GENOME057603.gff.gz	3
GUT_GENOME057603_00280	GUT_GENOME057603_00280	CCC80442.1	De-rhamnosylation	16	524	6	509	517	41.973	4.27e-136	413	97	3282324	254	18725	43.21	92.78	2.96	GUT_GENOME000004	d__Bacteria;p__Firmicutes_A;c__Clostridia;o__Lachnospirales;f__Lachnospiraceae;g__Blautia_A;s__Blautia_A sp900066165	ERS396479	ERP004605	Spain	ftp://ftp.ebi.ac.uk/pub/databases/metagenomics/mgnify_genomes/human-gut/v1.0/all_genomes/MGYG-HGUT-000/MGYG-HGUT-00002/genomes1/GUT_GENOME057603.gff.gz	1
GUT_GENOME095049_00696	GUT_GENOME095049_00696	KEF28010.1	O-deglycosylation	1	748	1	748	748	99.198	0	1532	100	1844238	295	7999	59.79	85.83	3.64	GUT_GENOME142522	d__Bacteria;p__Actinobacteriota;c__Actinobacteria;o__Actinomycetales;f__Bifidobacteriaceae;g__Bifidobacterium;s__Bifidobacterium adolescentis	ERS631828	ERP008729	Austria	ftp://ftp.ebi.ac.uk/pub/databases/metagenomics/mgnify_genomes/human-gut/v1.0/all_genomes/MGYG-HGUT-023/MGYG-HGUT-02395/genomes4/GUT_GENOME095049.gff.gz	1
GUT_GENOME058753_00133	GUT_GENOME130840_00215	BBG22493.1	C-deglyc (PUE)	1	367	1	369	369	68.293	0	540	100	4216827	579	10407	42.62	92.46	3.1	GUT_GENOME000004	d__Bacteria;p__Firmicutes_A;c__Clostridia;o__Lachnospirales;f__Lachnospiraceae;g__Blautia_A;s__Blautia_A sp900066165	SRS1993545	SRP100446	United States	ftp://ftp.ebi.ac.uk/pub/databases/metagenomics/mgnify_genomes/human-gut/v1.0/all_genomes/MGYG-HGUT-000/MGYG-HGUT-00002/genomes1/GUT_GENOME130840.gff.gz	2
GUT_GENOME060259_00181	GUT_GENOME060259_00181	CCC80442.1	De-rhamnosylation	4	523	3	521	525	43.429	2.01e-152	455	99	3893088	369	14474	43.22	96.68	0.16	GUT_GENOME000004	d__Bacteria;p__Firmicutes_A;c__Clostridia;o__Lachnospirales;f__Lachnospiraceae;g__Blautia_A;s__Blautia_A sp900066165	ERS473192	ERP005989	Denmark	ftp://ftp.ebi.ac.uk/pub/databases/metagenomics/mgnify_genomes/human-gut/v1.0/all_genomes/MGYG-HGUT-000/MGYG-HGUT-00002/genomes1/GUT_GENOME060259.gff.gz	1
GUT_GENOME060259_00668	GUT_GENOME004246_00667	QBM20342.1	De-rhamnosylation	1	887	1	887	895	54.525	0	1013	99	3927081	389	14470	43.23	97.94	0.16	GUT_GENOME000004	d__Bacteria;p__Firmicutes_A;c__Clostridia;o__Lachnospirales;f__Lachnospiraceae;g__Blautia_A;s__Blautia_A sp900066165	ERS473192	ERP005989	Sweden	ftp://ftp.ebi.ac.uk/pub/databases/metagenomics/mgnify_genomes/human-gut/v1.0/all_genomes/MGYG-HGUT-000/MGYG-HGUT-00002/genomes1/GUT_GENOME004246.gff.gz	4
GUT_GENOME120684_00417	GUT_GENOME120684_00417	KEF28010.1	O-deglycosylation	1	748	1	748	748	99.198	0	1531	100	1048723	25	61658	58.71	54.39	0	GUT_GENOME142522	d__Bacteria;p__Actinobacteriota;c__Actinobacteria;o__Actinomycetales;f__Bifidobacteriaceae;g__Bifidobacterium;s__Bifidobacterium adolescentis	ERS396489	ERP004605	Spain	ftp://ftp.ebi.ac.uk/pub/databases/metagenomics/mgnify_genomes/human-gut/v1.0/all_genomes/MGYG-HGUT-023/MGYG-HGUT-02395/genomes2/GUT_GENOME120684.gff.gz	1
GUT_GENOME120824_00948	GUT_GENOME120824_00948	KEF28010.1	O-deglycosylation	1	748	1	748	748	99.198	0	1531	100	2098208	100	36502	59.5	95.73	0.15	GUT_GENOME142522	d__Bacteria;p__Actinobacteriota;c__Actinobacteria;o__Actinomycetales;f__Bifidobacteriaceae;g__Bifidobacterium;s__Bifidobacterium adolescentis	ERS396493	ERP004605	Spain	ftp://ftp.ebi.ac.uk/pub/databases/metagenomics/mgnify_genomes/human-gut/v1.0/all_genomes/MGYG-HGUT-023/MGYG-HGUT-02395/genomes1/GUT_GENOME120824.gff.gz	1
GUT_GENOME127560_01118	GUT_GENOME127560_01118	KEF28010.1	O-deglycosylation	1	748	1	748	748	99.198	0	1534	100	1670749	224	12419	60.09	82.57	3.16	GUT_GENOME142522	d__Bacteria;p__Actinobacteriota;c__Actinobacteria;o__Actinomycetales;f__Bifidobacteriaceae;g__Bifidobacterium;s__Bifidobacterium adolescentis	SRS1596793	SRP080787	Mongolia	ftp://ftp.ebi.ac.uk/pub/databases/metagenomics/mgnify_genomes/human-gut/v1.0/all_genomes/MGYG-HGUT-023/MGYG-HGUT-02395/genomes1/GUT_GENOME127560.gff.gz	1
GUT_GENOME060362_00999	GUT_GENOME060362_00999	CCC80442.1	De-rhamnosylation	4	523	3	521	525	43.238	1.78e-151	452	99	2937180	184	26305	43.45	74.09	1.9	GUT_GENOME000004	d__Bacteria;p__Firmicutes_A;c__Clostridia;o__Lachnospirales;f__Lachnospiraceae;g__Blautia_A;s__Blautia_A sp900066165	ERS473202	ERP005989	Denmark	ftp://ftp.ebi.ac.uk/pub/databases/metagenomics/mgnify_genomes/human-gut/v1.0/all_genomes/MGYG-HGUT-000/MGYG-HGUT-00002/genomes1/GUT_GENOME060362.gff.gz	1
GUT_GENOME061100_01122	GUT_GENOME061100_01122	CCC80442.1	De-rhamnosylation	4	523	3	521	525	43.238	9.69e-152	453	99	3272381	142	39304	43.27	88.35	1.27	GUT_GENOME000004	d__Bacteria;p__Firmicutes_A;c__Clostridia;o__Lachnospirales;f__Lachnospiraceae;g__Blautia_A;s__Blautia_A sp900066165	ERS473258	ERP005989	Denmark	ftp://ftp.ebi.ac.uk/pub/databases/metagenomics/mgnify_genomes/human-gut/v1.0/all_genomes/MGYG-HGUT-000/MGYG-HGUT-00002/genomes1/GUT_GENOME061100.gff.gz	1
GUT_GENOME129257_01163	GUT_GENOME129257_01163	KEF28010.1	O-deglycosylation	1	748	1	748	748	99.198	0	1530	100	1708014	154	18125	60.14	93.27	0.41	GUT_GENOME142522	d__Bacteria;p__Actinobacteriota;c__Actinobacteria;o__Actinomycetales;f__Bifidobacteriaceae;g__Bifidobacterium;s__Bifidobacterium adolescentis	SRS1596860	SRP080787	Mongolia	ftp://ftp.ebi.ac.uk/pub/databases/metagenomics/mgnify_genomes/human-gut/v1.0/all_genomes/MGYG-HGUT-023/MGYG-HGUT-02395/genomes4/GUT_GENOME129257.gff.gz	1
GUT_GENOME135390_00995	GUT_GENOME135390_00995	KEF28010.1	O-deglycosylation	1	748	1	748	748	99.198	0	1530	100	2066366	236	11822	59.13	86.21	4.07	GUT_GENOME142522	d__Bacteria;p__Actinobacteriota;c__Actinobacteria;o__Actinomycetales;f__Bifidobacteriaceae;g__Bifidobacterium;s__Bifidobacterium adolescentis	ERS199227	ERP002061	Spain	ftp://ftp.ebi.ac.uk/pub/databases/metagenomics/mgnify_genomes/human-gut/v1.0/all_genomes/MGYG-HGUT-023/MGYG-HGUT-02395/genomes1/GUT_GENOME135390.gff.gz	1
GUT_GENOME061775_00175	GUT_GENOME061775_00175	CCC80442.1	De-rhamnosylation	4	523	3	521	525	43.238	9.69e-152	453	99	3582772	173	35589	43.08	92.25	0	GUT_GENOME000004	d__Bacteria;p__Firmicutes_A;c__Clostridia;o__Lachnospirales;f__Lachnospiraceae;g__Blautia_A;s__Blautia_A sp900066165	ERS473322	ERP005989	Denmark	ftp://ftp.ebi.ac.uk/pub/databases/metagenomics/mgnify_genomes/human-gut/v1.0/all_genomes/MGYG-HGUT-000/MGYG-HGUT-00002/genomes1/GUT_GENOME061775.gff.gz	1
GUT_GENOME061951_00630	GUT_GENOME061951_00630	QBM20342.1	De-rhamnosylation	1	887	1	887	895	54.637	0	1014	99	3112048	173	24757	43.45	88.9	1.08	GUT_GENOME000004	d__Bacteria;p__Firmicutes_A;c__Clostridia;o__Lachnospirales;f__Lachnospiraceae;g__Blautia_A;s__Blautia_A sp900066165	ERS473335	ERP005989	Denmark	ftp://ftp.ebi.ac.uk/pub/databases/metagenomics/mgnify_genomes/human-gut/v1.0/all_genomes/MGYG-HGUT-000/MGYG-HGUT-00002/genomes1/GUT_GENOME061951.gff.gz	1
GUT_GENOME163510_00493	GUT_GENOME163510_00493	KEF28010.1	O-deglycosylation	1	748	1	748	748	99.198	0	1531	100	2050309	45	78209	59.21	97.41	0.23	GUT_GENOME142522	d__Bacteria;p__Actinobacteriota;c__Actinobacteria;o__Actinomycetales;f__Bifidobacteriaceae;g__Bifidobacterium;s__Bifidobacterium adolescentis	SRS1876694	SRP095580	Netherlands	ftp://ftp.ebi.ac.uk/pub/databases/metagenomics/mgnify_genomes/human-gut/v1.0/all_genomes/MGYG-HGUT-023/MGYG-HGUT-02395/genomes4/GUT_GENOME163510.gff.gz	1
GUT_GENOME164192_00439	GUT_GENOME164192_00439	KEF28010.1	O-deglycosylation	1	748	1	748	748	99.198	0	1532	100	1890184	82	50916	59.7	97.31	1	GUT_GENOME142522	d__Bacteria;p__Actinobacteriota;c__Actinobacteria;o__Actinomycetales;f__Bifidobacteriaceae;g__Bifidobacterium;s__Bifidobacterium adolescentis	SRS1876609	SRP095580	Netherlands	ftp://ftp.ebi.ac.uk/pub/databases/metagenomics/mgnify_genomes/human-gut/v1.0/all_genomes/MGYG-HGUT-023/MGYG-HGUT-02395/genomes3/GUT_GENOME164192.gff.gz	2
GUT_GENOME173504_01695	GUT_GENOME131941_01709	KEF28010.1	O-deglycosylation	1	748	1	748	748	99.198	0	1532	100	2025174	129	26467	59.75	98.96	0.85	GUT_GENOME142522	d__Bacteria;p__Actinobacteriota;c__Actinobacteria;o__Actinomycetales;f__Bifidobacteriaceae;g__Bifidobacterium;s__Bifidobacterium adolescentis	NA	NA	Germany	ftp://ftp.ebi.ac.uk/pub/databases/metagenomics/mgnify_genomes/human-gut/v1.0/all_genomes/MGYG-HGUT-023/MGYG-HGUT-02395/genomes1/GUT_GENOME131941.gff.gz	3
GUT_GENOME063014_01756	GUT_GENOME065951_01970	BBG22493.1	C-deglyc (PUE)	1	367	1	357	368	52.717	3.29e-133	394	100	3329996	176	28666	43.37	89.77	2.06	GUT_GENOME000004	d__Bacteria;p__Firmicutes_A;c__Clostridia;o__Lachnospirales;f__Lachnospiraceae;g__Blautia_A;s__Blautia_A sp900066165	ERS746724	ERP010700	United Kingdom	ftp://ftp.ebi.ac.uk/pub/databases/metagenomics/mgnify_genomes/human-gut/v1.0/all_genomes/MGYG-HGUT-000/MGYG-HGUT-00002/genomes1/GUT_GENOME065951.gff.gz	1
GUT_GENOME063147_00529	GUT_GENOME027767_01759	CCC80442.1	De-rhamnosylation	4	523	3	521	525	43.238	6.28e-151	451	99	2728197	121	37596	43.83	79.21	1.45	GUT_GENOME000004	d__Bacteria;p__Firmicutes_A;c__Clostridia;o__Lachnospirales;f__Lachnospiraceae;g__Blautia_A;s__Blautia_A sp900066165	DRS026605	DRP003048	Japan	ftp://ftp.ebi.ac.uk/pub/databases/metagenomics/mgnify_genomes/human-gut/v1.0/all_genomes/MGYG-HGUT-000/MGYG-HGUT-00002/genomes1/GUT_GENOME027767.gff.gz	10
GUT_GENOME063147_01651	GUT_GENOME063147_01651	QBM20342.1	De-rhamnosylation	1	887	1	887	895	54.637	0	1014	99	4470839	202	38128	42.65	91.76	5	GUT_GENOME000004	d__Bacteria;p__Firmicutes_A;c__Clostridia;o__Lachnospirales;f__Lachnospiraceae;g__Blautia_A;s__Blautia_A sp900066165	ERS537183	ERP006678	China	ftp://ftp.ebi.ac.uk/pub/databases/metagenomics/mgnify_genomes/human-gut/v1.0/all_genomes/MGYG-HGUT-000/MGYG-HGUT-00002/genomes1/GUT_GENOME063147.gff.gz	1
GUT_GENOME180804_00529	GUT_GENOME180804_00529	KEF28010.1	O-deglycosylation	1	748	1	748	748	99.198	0	1531	100	1837101	205	12225	59.59	92.26	2.39	GUT_GENOME142522	d__Bacteria;p__Actinobacteriota;c__Actinobacteria;o__Actinomycetales;f__Bifidobacteriaceae;g__Bifidobacterium;s__Bifidobacterium adolescentis	SRS1596783	SRP080787	Mongolia	ftp://ftp.ebi.ac.uk/pub/databases/metagenomics/mgnify_genomes/human-gut/v1.0/all_genomes/MGYG-HGUT-023/MGYG-HGUT-02395/genomes3/GUT_GENOME180804.gff.gz	1
GUT_GENOME182182_00976	GUT_GENOME182182_00976	KEF28010.1	O-deglycosylation	1	748	1	748	748	99.198	0	1534	100	1710165	245	8869	59.68	89.07	0.71	GUT_GENOME142522	d__Bacteria;p__Actinobacteriota;c__Actinobacteria;o__Actinomycetales;f__Bifidobacteriaceae;g__Bifidobacterium;s__Bifidobacterium adolescentis	SRS1719203	SRP090628	Finland	ftp://ftp.ebi.ac.uk/pub/databases/metagenomics/mgnify_genomes/human-gut/v1.0/all_genomes/MGYG-HGUT-023/MGYG-HGUT-02395/genomes4/GUT_GENOME182182.gff.gz	1
GUT_GENOME196411_01248	GUT_GENOME196411_01248	KEF28010.1	O-deglycosylation	1	748	1	748	748	99.198	0	1531	100	1973306	56	48484	59.45	96.6	0.41	GUT_GENOME142522	d__Bacteria;p__Actinobacteriota;c__Actinobacteria;o__Actinomycetales;f__Bifidobacteriaceae;g__Bifidobacterium;s__Bifidobacterium adolescentis	SRS1876355	SRP095580	Netherlands	ftp://ftp.ebi.ac.uk/pub/databases/metagenomics/mgnify_genomes/human-gut/v1.0/all_genomes/MGYG-HGUT-023/MGYG-HGUT-02395/genomes4/GUT_GENOME196411.gff.gz	1
GUT_GENOME196433_01083	GUT_GENOME196433_01083	KEF28010.1	O-deglycosylation	1	748	1	748	748	99.198	0	1531	100	1990855	147	18902	59.82	95.86	1	GUT_GENOME142522	d__Bacteria;p__Actinobacteriota;c__Actinobacteria;o__Actinomycetales;f__Bifidobacteriaceae;g__Bifidobacterium;s__Bifidobacterium adolescentis	SRS1876358	SRP095580	Netherlands	ftp://ftp.ebi.ac.uk/pub/databases/metagenomics/mgnify_genomes/human-gut/v1.0/all_genomes/MGYG-HGUT-023/MGYG-HGUT-02395/genomes4/GUT_GENOME196433.gff.gz	1
GUT_GENOME197961_01540	GUT_GENOME197961_01540	KEF28010.1	O-deglycosylation	1	748	1	748	748	99.198	0	1531	100	2124698	18	195499	59.33	100	0	GUT_GENOME142522	d__Bacteria;p__Actinobacteriota;c__Actinobacteria;o__Actinomycetales;f__Bifidobacteriaceae;g__Bifidobacterium;s__Bifidobacterium adolescentis	SRS1876646	SRP095580	Netherlands	ftp://ftp.ebi.ac.uk/pub/databases/metagenomics/mgnify_genomes/human-gut/v1.0/all_genomes/MGYG-HGUT-023/MGYG-HGUT-02395/genomes5/GUT_GENOME197961.gff.gz	1
GUT_GENOME199071_00998	GUT_GENOME130412_00855	KEF28010.1	O-deglycosylation	1	748	1	748	748	99.198	0	1532	100	1958466	30	103618	59.74	99.55	1.11	GUT_GENOME142522	d__Bacteria;p__Actinobacteriota;c__Actinobacteria;o__Actinomycetales;f__Bifidobacteriaceae;g__Bifidobacterium;s__Bifidobacterium adolescentis	SRS1993576	SRP100446	United States	ftp://ftp.ebi.ac.uk/pub/databases/metagenomics/mgnify_genomes/human-gut/v1.0/all_genomes/MGYG-HGUT-023/MGYG-HGUT-02395/genomes2/GUT_GENOME130412.gff.gz	2
GUT_GENOME064099_02041	GUT_GENOME247173_01343	QBM20340.1	De-rhamnosylation	2	808	1	813	827	40.266	0	590	97	3151068	377	11851	43.64	88.9	2.93	GUT_GENOME000004	d__Bacteria;p__Firmicutes_A;c__Clostridia;o__Lachnospirales;f__Lachnospiraceae;g__Blautia_A;s__Blautia_A sp900066165	ERS1066726	ERP013933	United States	ftp://ftp.ebi.ac.uk/pub/databases/metagenomics/mgnify_genomes/human-gut/v1.0/all_genomes/MGYG-HGUT-000/MGYG-HGUT-00002/genomes1/GUT_GENOME247173.gff.gz	1
GUT_GENOME064179_01040	GUT_GENOME064179_01040	CCC80442.1	De-rhamnosylation	4	523	3	521	525	43.238	1.56e-150	450	99	3639366	164	33827	43.05	94.59	0.97	GUT_GENOME000004	d__Bacteria;p__Firmicutes_A;c__Clostridia;o__Lachnospirales;f__Lachnospiraceae;g__Blautia_A;s__Blautia_A sp900066165	ERS537408	ERP006678	China	ftp://ftp.ebi.ac.uk/pub/databases/metagenomics/mgnify_genomes/human-gut/v1.0/all_genomes/MGYG-HGUT-000/MGYG-HGUT-00002/genomes1/GUT_GENOME064179.gff.gz	1
GUT_GENOME218349_00174	GUT_GENOME218349_00174	KEF28010.1	O-deglycosylation	1	748	1	748	748	99.198	0	1531	100	1861672	513	4543	59.86	85.66	3.9	GUT_GENOME142522	d__Bacteria;p__Actinobacteriota;c__Actinobacteria;o__Actinomycetales;f__Bifidobacteriaceae;g__Bifidobacterium;s__Bifidobacterium adolescentis	SRS1170763	SRP066479	El Salvador	ftp://ftp.ebi.ac.uk/pub/databases/metagenomics/mgnify_genomes/human-gut/v1.0/all_genomes/MGYG-HGUT-023/MGYG-HGUT-02395/genomes1/GUT_GENOME218349.gff.gz	1
GUT_GENOME218602_00399	GUT_GENOME218602_00399	KEF28010.1	O-deglycosylation	1	748	1	748	748	99.198	0	1532	100	1857489	608	3756	59.86	87.04	2.52	GUT_GENOME142522	d__Bacteria;p__Actinobacteriota;c__Actinobacteria;o__Actinomycetales;f__Bifidobacteriaceae;g__Bifidobacterium;s__Bifidobacterium adolescentis	SRS1170819	SRP066479	El Salvador	ftp://ftp.ebi.ac.uk/pub/databases/metagenomics/mgnify_genomes/human-gut/v1.0/all_genomes/MGYG-HGUT-023/MGYG-HGUT-02395/genomes2/GUT_GENOME218602.gff.gz	1
GUT_GENOME064285_01609	GUT_GENOME064285_01609	QBM20342.1	De-rhamnosylation	1	887	1	887	895	54.637	0	1016	99	3434955	457	9509	43.16	82.56	4.51	GUT_GENOME000004	d__Bacteria;p__Firmicutes_A;c__Clostridia;o__Lachnospirales;f__Lachnospiraceae;g__Blautia_A;s__Blautia_A sp900066165	ERS608499	ERP008729	Austria	ftp://ftp.ebi.ac.uk/pub/databases/metagenomics/mgnify_genomes/human-gut/v1.0/all_genomes/MGYG-HGUT-000/MGYG-HGUT-00002/genomes1/GUT_GENOME064285.gff.gz	3
GUT_GENOME218638_00785	GUT_GENOME218638_00785	KEF28010.1	O-deglycosylation	1	748	1	748	748	99.198	0	1531	100	1514947	277	6189	60.01	75.16	0.74	GUT_GENOME142522	d__Bacteria;p__Actinobacteriota;c__Actinobacteria;o__Actinomycetales;f__Bifidobacteriaceae;g__Bifidobacterium;s__Bifidobacterium adolescentis	SRS1170826	SRP066479	El Salvador	ftp://ftp.ebi.ac.uk/pub/databases/metagenomics/mgnify_genomes/human-gut/v1.0/all_genomes/MGYG-HGUT-023/MGYG-HGUT-02395/genomes2/GUT_GENOME218638.gff.gz	1
GUT_GENOME220156_00357	GUT_GENOME220156_00357	KEF28010.1	O-deglycosylation	1	748	1	748	748	99.198	0	1531	100	2166816	90	43528	59.82	99.55	0.7	GUT_GENOME142522	d__Bacteria;p__Actinobacteriota;c__Actinobacteria;o__Actinomycetales;f__Bifidobacteriaceae;g__Bifidobacterium;s__Bifidobacterium adolescentis	SRS1596783	SRP080787	Mongolia	ftp://ftp.ebi.ac.uk/pub/databases/metagenomics/mgnify_genomes/human-gut/v1.0/all_genomes/MGYG-HGUT-023/MGYG-HGUT-02395/genomes2/GUT_GENOME220156.gff.gz	1
GUT_GENOME064285_02553	GUT_GENOME064285_02553	CCC80442.1	De-rhamnosylation	4	523	3	521	525	42.857	4.94e-150	449	99	3434955	457	9509	43.16	82.56	4.51	GUT_GENOME000004	d__Bacteria;p__Firmicutes_A;c__Clostridia;o__Lachnospirales;f__Lachnospiraceae;g__Blautia_A;s__Blautia_A sp900066165	ERS608499	ERP008729	Austria	ftp://ftp.ebi.ac.uk/pub/databases/metagenomics/mgnify_genomes/human-gut/v1.0/all_genomes/MGYG-HGUT-000/MGYG-HGUT-00002/genomes1/GUT_GENOME064285.gff.gz	1
GUT_GENOME240481_00980	GUT_GENOME240481_00980	KEF28010.1	O-deglycosylation	1	748	1	748	748	99.198	0	1534	100	1795702	284	8705	59.68	91.28	1.62	GUT_GENOME142522	d__Bacteria;p__Actinobacteriota;c__Actinobacteria;o__Actinomycetales;f__Bifidobacteriaceae;g__Bifidobacterium;s__Bifidobacterium adolescentis	SRS1719203	SRP090628	Finland	ftp://ftp.ebi.ac.uk/pub/databases/metagenomics/mgnify_genomes/human-gut/v1.0/all_genomes/MGYG-HGUT-023/MGYG-HGUT-02395/genomes1/GUT_GENOME240481.gff.gz	1
GUT_GENOME064422_02051	GUT_GENOME064422_02051	CCC80442.1	De-rhamnosylation	4	523	3	521	525	43.238	9.69e-152	453	99	3417587	180	28725	43.36	85.09	4.22	GUT_GENOME000004	d__Bacteria;p__Firmicutes_A;c__Clostridia;o__Lachnospirales;f__Lachnospiraceae;g__Blautia_A;s__Blautia_A sp900066165	ERS608563	ERP008729	Austria	ftp://ftp.ebi.ac.uk/pub/databases/metagenomics/mgnify_genomes/human-gut/v1.0/all_genomes/MGYG-HGUT-000/MGYG-HGUT-00002/genomes1/GUT_GENOME064422.gff.gz	1
GUT_GENOME254718_00412	GUT_GENOME254718_00412	KEF28010.1	O-deglycosylation	1	748	1	748	748	99.198	0	1530	100	1720672	176	14650	59.64	64.19	0	GUT_GENOME142522	d__Bacteria;p__Actinobacteriota;c__Actinobacteria;o__Actinomycetales;f__Bifidobacteriaceae;g__Bifidobacterium;s__Bifidobacterium adolescentis	ERS746758	ERP010700	United Kingdom	ftp://ftp.ebi.ac.uk/pub/databases/metagenomics/mgnify_genomes/human-gut/v1.0/all_genomes/MGYG-HGUT-023/MGYG-HGUT-02395/genomes1/GUT_GENOME254718.gff.gz	1
GUT_GENOME256571_00609	GUT_GENOME256571_00609	KEF28010.1	O-deglycosylation	1	748	1	748	748	99.198	0	1533	100	1347580	104	22720	60.22	66.62	0.08	GUT_GENOME142522	d__Bacteria;p__Actinobacteriota;c__Actinobacteria;o__Actinomycetales;f__Bifidobacteriaceae;g__Bifidobacterium;s__Bifidobacterium adolescentis	ERS746896	ERP010700	United Kingdom	ftp://ftp.ebi.ac.uk/pub/databases/metagenomics/mgnify_genomes/human-gut/v1.0/all_genomes/MGYG-HGUT-023/MGYG-HGUT-02395/genomes4/GUT_GENOME256571.gff.gz	1
GUT_GENOME064537_00682	GUT_GENOME000126_00691	CCC80442.1	De-rhamnosylation	4	523	3	521	525	42.857	5.27e-150	449	99	4245524	109	82751	42.82	99.37	0	GUT_GENOME000004	d__Bacteria;p__Firmicutes_A;c__Clostridia;o__Lachnospirales;f__Lachnospiraceae;g__Blautia_A;s__Blautia_A sp900066165	ERS852401	ERP012217	United Kingdom	ftp://ftp.ebi.ac.uk/pub/databases/metagenomics/mgnify_genomes/human-gut/v1.0/all_genomes/MGYG-HGUT-000/MGYG-HGUT-00002/genomes1/GUT_GENOME000126.gff.gz	6
GUT_GENOME123535_01072	GUT_GENOME123535_01072	KEF27912.1	O-deglycosylation	1	809	1	809	809	99.135	0	1642	100	1258543	62	37314	60.63	61.7	2.27	GUT_GENOME142522	d__Bacteria;p__Actinobacteriota;c__Actinobacteria;o__Actinomycetales;f__Bifidobacteriaceae;g__Bifidobacterium;s__Bifidobacterium adolescentis	ERS1138872	ERP015450	China	ftp://ftp.ebi.ac.uk/pub/databases/metagenomics/mgnify_genomes/human-gut/v1.0/all_genomes/MGYG-HGUT-023/MGYG-HGUT-02395/genomes3/GUT_GENOME123535.gff.gz	1
GUT_GENOME064849_00200	GUT_GENOME064849_00200	CCC80442.1	De-rhamnosylation	4	523	3	521	525	42.857	1.08e-149	448	99	2462455	326	9088	43.79	65.29	1.75	GUT_GENOME000004	d__Bacteria;p__Firmicutes_A;c__Clostridia;o__Lachnospirales;f__Lachnospiraceae;g__Blautia_A;s__Blautia_A sp900066165	ERS608501	ERP008729	Austria	ftp://ftp.ebi.ac.uk/pub/databases/metagenomics/mgnify_genomes/human-gut/v1.0/all_genomes/MGYG-HGUT-000/MGYG-HGUT-00002/genomes1/GUT_GENOME064849.gff.gz	1
GUT_GENOME224299_00007	GUT_GENOME224299_00007	KEF28001.1	O-deglycosylation	1	780	1	780	780	99.103	0	1583	100	1784442	22	119177	59.42	82.46	0.42	GUT_GENOME142522	d__Bacteria;p__Actinobacteriota;c__Actinobacteria;o__Actinomycetales;f__Bifidobacteriaceae;g__Bifidobacterium;s__Bifidobacterium adolescentis	SRS1719540	SRP090628	Russia	ftp://ftp.ebi.ac.uk/pub/databases/metagenomics/mgnify_genomes/human-gut/v1.0/all_genomes/MGYG-HGUT-023/MGYG-HGUT-02395/genomes5/GUT_GENOME224299.gff.gz	1
GUT_GENOME064849_01658	GUT_GENOME064849_01658	CCC80442.1	De-rhamnosylation	104	524	3	424	425	42.824	1.32e-120	370	80	2462455	326	9088	43.79	65.29	1.75	GUT_GENOME000004	d__Bacteria;p__Firmicutes_A;c__Clostridia;o__Lachnospirales;f__Lachnospiraceae;g__Blautia_A;s__Blautia_A sp900066165	ERS608501	ERP008729	Austria	ftp://ftp.ebi.ac.uk/pub/databases/metagenomics/mgnify_genomes/human-gut/v1.0/all_genomes/MGYG-HGUT-000/MGYG-HGUT-00002/genomes1/GUT_GENOME064849.gff.gz	1
GUT_GENOME064874_00479	GUT_GENOME064874_00479	ANI69961.1	O-demethylation	13	208	75	271	197	46.701	1.21e-51	187	93	1878890	296	7266	43.51	67.25	3.35	GUT_GENOME000004	d__Bacteria;p__Firmicutes_A;c__Clostridia;o__Lachnospirales;f__Lachnospiraceae;g__Blautia_A;s__Blautia_A sp900066165	ERS608542	ERP008729	Austria	ftp://ftp.ebi.ac.uk/pub/databases/metagenomics/mgnify_genomes/human-gut/v1.0/all_genomes/MGYG-HGUT-000/MGYG-HGUT-00002/genomes1/GUT_GENOME064874.gff.gz	2
GUT_GENOME064994_00691	GUT_GENOME064994_00691	CCC80442.1	De-rhamnosylation	4	523	3	521	525	43.238	9.69e-152	453	99	3433921	259	17445	43.2	93.3	2.93	GUT_GENOME000004	d__Bacteria;p__Firmicutes_A;c__Clostridia;o__Lachnospirales;f__Lachnospiraceae;g__Blautia_A;s__Blautia_A sp900066165	ERS608513	ERP008729	Austria	ftp://ftp.ebi.ac.uk/pub/databases/metagenomics/mgnify_genomes/human-gut/v1.0/all_genomes/MGYG-HGUT-000/MGYG-HGUT-00002/genomes1/GUT_GENOME064994.gff.gz	1
GUT_GENOME160588_00735	GUT_GENOME160588_00735	KEF28010.1	O-deglycosylation	93	748	1	656	656	99.085	0	1341	88	944072	47	33915	59.46	50.88	0	GUT_GENOME142522	d__Bacteria;p__Actinobacteriota;c__Actinobacteria;o__Actinomycetales;f__Bifidobacteriaceae;g__Bifidobacterium;s__Bifidobacterium adolescentis	SRS1876417	SRP095580	Netherlands	ftp://ftp.ebi.ac.uk/pub/databases/metagenomics/mgnify_genomes/human-gut/v1.0/all_genomes/MGYG-HGUT-023/MGYG-HGUT-02395/genomes4/GUT_GENOME160588.gff.gz	1
GUT_GENOME065621_00734	GUT_GENOME065621_00734	KEF28010.1	O-deglycosylation	1	748	1	748	748	99.064	0	1531	100	1309599	23	73300	59.95	58.57	0.36	GUT_GENOME142522	d__Bacteria;p__Actinobacteriota;c__Actinobacteria;o__Actinomycetales;f__Bifidobacteriaceae;g__Bifidobacterium;s__Bifidobacterium adolescentis	ERS631830	ERP008729	Austria	ftp://ftp.ebi.ac.uk/pub/databases/metagenomics/mgnify_genomes/human-gut/v1.0/all_genomes/MGYG-HGUT-023/MGYG-HGUT-02395/genomes4/GUT_GENOME065621.gff.gz	1
GUT_GENOME067178_01683	GUT_GENOME056185_00975	KEF28010.1	O-deglycosylation	1	748	1	748	748	99.064	0	1529	100	1952544	183	15721	59.52	93.41	3.37	GUT_GENOME142522	d__Bacteria;p__Actinobacteriota;c__Actinobacteria;o__Actinomycetales;f__Bifidobacteriaceae;g__Bifidobacterium;s__Bifidobacterium adolescentis	ERS396362	ERP004605	Denmark	ftp://ftp.ebi.ac.uk/pub/databases/metagenomics/mgnify_genomes/human-gut/v1.0/all_genomes/MGYG-HGUT-023/MGYG-HGUT-02395/genomes4/GUT_GENOME056185.gff.gz	4
GUT_GENOME065475_00169	GUT_GENOME065475_00169	ANI69962.1	O-demethylation	2	257	1	255	258	40.31	3.58e-56	204	94	3325756	361	12567	43.36	83.17	2.53	GUT_GENOME000004	d__Bacteria;p__Firmicutes_A;c__Clostridia;o__Lachnospirales;f__Lachnospiraceae;g__Blautia_A;s__Blautia_A sp900066165	ERS608584	ERP008729	Austria	ftp://ftp.ebi.ac.uk/pub/databases/metagenomics/mgnify_genomes/human-gut/v1.0/all_genomes/MGYG-HGUT-000/MGYG-HGUT-00002/genomes1/GUT_GENOME065475.gff.gz	1
GUT_GENOME065475_00384	GUT_GENOME065475_00384	QBM20342.1	De-rhamnosylation	1	887	1	887	895	54.637	0	1016	99	3325756	361	12567	43.36	83.17	2.53	GUT_GENOME000004	d__Bacteria;p__Firmicutes_A;c__Clostridia;o__Lachnospirales;f__Lachnospiraceae;g__Blautia_A;s__Blautia_A sp900066165	ERS608584	ERP008729	Austria	ftp://ftp.ebi.ac.uk/pub/databases/metagenomics/mgnify_genomes/human-gut/v1.0/all_genomes/MGYG-HGUT-000/MGYG-HGUT-00002/genomes1/GUT_GENOME065475.gff.gz	1
GUT_GENOME070642_00127	GUT_GENOME070642_00127	KEF28010.1	O-deglycosylation	1	748	1	748	748	99.064	0	1532	100	1553994	259	6907	59.52	79.12	2.49	GUT_GENOME142522	d__Bacteria;p__Actinobacteriota;c__Actinobacteria;o__Actinomycetales;f__Bifidobacteriaceae;g__Bifidobacterium;s__Bifidobacterium adolescentis	ERS396364	ERP004605	Denmark	ftp://ftp.ebi.ac.uk/pub/databases/metagenomics/mgnify_genomes/human-gut/v1.0/all_genomes/MGYG-HGUT-023/MGYG-HGUT-02395/genomes1/GUT_GENOME070642.gff.gz	1
GUT_GENOME075057_00880	GUT_GENOME075057_00880	KEF28010.1	O-deglycosylation	1	748	1	748	748	99.064	0	1528	100	1909385	296	10530	59.79	88.06	4.27	GUT_GENOME142522	d__Bacteria;p__Actinobacteriota;c__Actinobacteria;o__Actinomycetales;f__Bifidobacteriaceae;g__Bifidobacterium;s__Bifidobacterium adolescentis	ERS396524	ERP004605	Spain	ftp://ftp.ebi.ac.uk/pub/databases/metagenomics/mgnify_genomes/human-gut/v1.0/all_genomes/MGYG-HGUT-023/MGYG-HGUT-02395/genomes1/GUT_GENOME075057.gff.gz	1
GUT_GENOME065475_00771	GUT_GENOME065475_00771	CCC80442.1	De-rhamnosylation	4	523	3	521	525	43.238	9.69e-152	453	99	3325756	361	12567	43.36	83.17	2.53	GUT_GENOME000004	d__Bacteria;p__Firmicutes_A;c__Clostridia;o__Lachnospirales;f__Lachnospiraceae;g__Blautia_A;s__Blautia_A sp900066165	ERS608584	ERP008729	Austria	ftp://ftp.ebi.ac.uk/pub/databases/metagenomics/mgnify_genomes/human-gut/v1.0/all_genomes/MGYG-HGUT-000/MGYG-HGUT-00002/genomes1/GUT_GENOME065475.gff.gz	1
GUT_GENOME078062_01796	GUT_GENOME078062_01796	KEF28010.1	O-deglycosylation	1	748	1	748	748	99.064	0	1530	100	2085151	401	8822	59.9	96.86	4.75	GUT_GENOME142522	d__Bacteria;p__Actinobacteriota;c__Actinobacteria;o__Actinomycetales;f__Bifidobacteriaceae;g__Bifidobacterium;s__Bifidobacterium adolescentis	ERS473228	ERP005989	Sweden	ftp://ftp.ebi.ac.uk/pub/databases/metagenomics/mgnify_genomes/human-gut/v1.0/all_genomes/MGYG-HGUT-023/MGYG-HGUT-02395/genomes1/GUT_GENOME078062.gff.gz	1
GUT_GENOME065519_00430	GUT_GENOME065519_00430	CCC80442.1	De-rhamnosylation	4	523	3	521	525	42.857	8.23e-150	448	99	2973626	412	9138	43.52	63.51	1.75	GUT_GENOME000004	d__Bacteria;p__Firmicutes_A;c__Clostridia;o__Lachnospirales;f__Lachnospiraceae;g__Blautia_A;s__Blautia_A sp900066165	ERS608595	ERP008729	Austria	ftp://ftp.ebi.ac.uk/pub/databases/metagenomics/mgnify_genomes/human-gut/v1.0/all_genomes/MGYG-HGUT-000/MGYG-HGUT-00002/genomes1/GUT_GENOME065519.gff.gz	1
GUT_GENOME090777_00921	GUT_GENOME090777_00921	KEF28010.1	O-deglycosylation	1	748	1	748	748	99.064	0	1531	100	2019207	42	70530	59.87	98.22	0.45	GUT_GENOME142522	d__Bacteria;p__Actinobacteriota;c__Actinobacteria;o__Actinomycetales;f__Bifidobacteriaceae;g__Bifidobacterium;s__Bifidobacterium adolescentis	ERS631830	ERP008729	Austria	ftp://ftp.ebi.ac.uk/pub/databases/metagenomics/mgnify_genomes/human-gut/v1.0/all_genomes/MGYG-HGUT-023/MGYG-HGUT-02395/genomes1/GUT_GENOME090777.gff.gz	1
GUT_GENOME091052_00548	GUT_GENOME091052_00548	KEF28010.1	O-deglycosylation	1	748	1	748	748	99.064	0	1528	100	1295664	55	43999	59.54	71.97	0	GUT_GENOME142522	d__Bacteria;p__Actinobacteriota;c__Actinobacteria;o__Actinomycetales;f__Bifidobacteriaceae;g__Bifidobacterium;s__Bifidobacterium adolescentis	ERS608508	ERP008729	Austria	ftp://ftp.ebi.ac.uk/pub/databases/metagenomics/mgnify_genomes/human-gut/v1.0/all_genomes/MGYG-HGUT-023/MGYG-HGUT-02395/genomes4/GUT_GENOME091052.gff.gz	1
GUT_GENOME065951_01573	GUT_GENOME065951_01573	CCC80442.1	De-rhamnosylation	4	523	3	521	525	43.238	9.69e-152	453	99	3329996	176	28666	43.37	89.77	2.06	GUT_GENOME000004	d__Bacteria;p__Firmicutes_A;c__Clostridia;o__Lachnospirales;f__Lachnospiraceae;g__Blautia_A;s__Blautia_A sp900066165	ERS746724	ERP010700	United Kingdom	ftp://ftp.ebi.ac.uk/pub/databases/metagenomics/mgnify_genomes/human-gut/v1.0/all_genomes/MGYG-HGUT-000/MGYG-HGUT-00002/genomes1/GUT_GENOME065951.gff.gz	1
GUT_GENOME065951_01656	GUT_GENOME065951_01656	ANI69962.1	O-demethylation	2	257	1	255	257	40.078	5.53e-56	203	94	3329996	176	28666	43.37	89.77	2.06	GUT_GENOME000004	d__Bacteria;p__Firmicutes_A;c__Clostridia;o__Lachnospirales;f__Lachnospiraceae;g__Blautia_A;s__Blautia_A sp900066165	ERS746724	ERP010700	United Kingdom	ftp://ftp.ebi.ac.uk/pub/databases/metagenomics/mgnify_genomes/human-gut/v1.0/all_genomes/MGYG-HGUT-000/MGYG-HGUT-00002/genomes1/GUT_GENOME065951.gff.gz	3
GUT_GENOME066306_00389	GUT_GENOME066306_00389	CCC80440.1	De-rhamnosylation	3	652	1	654	655	45.038	0	597	99	3725771	265	33098	43.46	90.98	3.9	GUT_GENOME000004	d__Bacteria;p__Firmicutes_A;c__Clostridia;o__Lachnospirales;f__Lachnospiraceae;g__Blautia_A;s__Blautia_A sp900066165	ERS235506	ERP002469	Sweden	ftp://ftp.ebi.ac.uk/pub/databases/metagenomics/mgnify_genomes/human-gut/v1.0/all_genomes/MGYG-HGUT-000/MGYG-HGUT-00002/genomes1/GUT_GENOME066306.gff.gz	1
GUT_GENOME066624_00661	GUT_GENOME066624_00661	CCC80442.1	De-rhamnosylation	4	523	3	521	525	43.238	9.69e-152	453	99	1859444	299	9171	44.3	69.25	1.27	GUT_GENOME000004	d__Bacteria;p__Firmicutes_A;c__Clostridia;o__Lachnospirales;f__Lachnospiraceae;g__Blautia_A;s__Blautia_A sp900066165	ERS235528	ERP002469	Sweden	ftp://ftp.ebi.ac.uk/pub/databases/metagenomics/mgnify_genomes/human-gut/v1.0/all_genomes/MGYG-HGUT-000/MGYG-HGUT-00002/genomes1/GUT_GENOME066624.gff.gz	1
GUT_GENOME094277_00413	GUT_GENOME088464_00512	KEF28010.1	O-deglycosylation	1	748	1	748	748	99.064	0	1529	100	1724290	356	6522	59.97	82.19	0.85	GUT_GENOME142522	d__Bacteria;p__Actinobacteriota;c__Actinobacteria;o__Actinomycetales;f__Bifidobacteriaceae;g__Bifidobacterium;s__Bifidobacterium adolescentis	ERS608539	ERP008729	Austria	ftp://ftp.ebi.ac.uk/pub/databases/metagenomics/mgnify_genomes/human-gut/v1.0/all_genomes/MGYG-HGUT-023/MGYG-HGUT-02395/genomes5/GUT_GENOME088464.gff.gz	2
GUT_GENOME066870_02037	GUT_GENOME066870_02037	CCC80442.1	De-rhamnosylation	4	523	3	521	525	43.048	2.81e-150	449	99	3569415	455	12556	43.56	93.74	3.6	GUT_GENOME000004	d__Bacteria;p__Firmicutes_A;c__Clostridia;o__Lachnospirales;f__Lachnospiraceae;g__Blautia_A;s__Blautia_A sp900066165	ERS235537	ERP002469	Sweden	ftp://ftp.ebi.ac.uk/pub/databases/metagenomics/mgnify_genomes/human-gut/v1.0/all_genomes/MGYG-HGUT-000/MGYG-HGUT-00002/genomes1/GUT_GENOME066870.gff.gz	1
GUT_GENOME067568_00894	GUT_GENOME067568_00894	CCC80442.1	De-rhamnosylation	4	523	3	521	525	43.238	9.69e-152	453	99	4000618	357	30296	43.2	98.1	0	GUT_GENOME000004	d__Bacteria;p__Firmicutes_A;c__Clostridia;o__Lachnospirales;f__Lachnospiraceae;g__Blautia_A;s__Blautia_A sp900066165	ERS235565	ERP002469	Sweden	ftp://ftp.ebi.ac.uk/pub/databases/metagenomics/mgnify_genomes/human-gut/v1.0/all_genomes/MGYG-HGUT-000/MGYG-HGUT-00002/genomes1/GUT_GENOME067568.gff.gz	1
GUT_GENOME095099_00722	GUT_GENOME095099_00722	KEF28010.1	O-deglycosylation	1	748	1	748	748	99.064	0	1531	100	1066177	17	127769	59.06	54.39	0	GUT_GENOME142522	d__Bacteria;p__Actinobacteriota;c__Actinobacteria;o__Actinomycetales;f__Bifidobacteriaceae;g__Bifidobacterium;s__Bifidobacterium adolescentis	ERS631830	ERP008729	Austria	ftp://ftp.ebi.ac.uk/pub/databases/metagenomics/mgnify_genomes/human-gut/v1.0/all_genomes/MGYG-HGUT-023/MGYG-HGUT-02395/genomes2/GUT_GENOME095099.gff.gz	1
GUT_GENOME067835_01047	GUT_GENOME067835_01047	ANI69962.1	O-demethylation	2	257	1	255	257	40.078	1.22e-55	202	94	2712193	699	5347	43.36	75.34	1.83	GUT_GENOME000004	d__Bacteria;p__Firmicutes_A;c__Clostridia;o__Lachnospirales;f__Lachnospiraceae;g__Blautia_A;s__Blautia_A sp900066165	ERS235582	ERP002469	Sweden	ftp://ftp.ebi.ac.uk/pub/databases/metagenomics/mgnify_genomes/human-gut/v1.0/all_genomes/MGYG-HGUT-000/MGYG-HGUT-00002/genomes1/GUT_GENOME067835.gff.gz	1
GUT_GENOME067864_00433	GUT_GENOME067864_00433	CCC80442.1	De-rhamnosylation	4	523	3	521	525	43.238	9.69e-152	453	99	4584774	374	27004	43.27	91.14	0.63	GUT_GENOME000004	d__Bacteria;p__Firmicutes_A;c__Clostridia;o__Lachnospirales;f__Lachnospiraceae;g__Blautia_A;s__Blautia_A sp900066165	ERS235584	ERP002469	Sweden	ftp://ftp.ebi.ac.uk/pub/databases/metagenomics/mgnify_genomes/human-gut/v1.0/all_genomes/MGYG-HGUT-000/MGYG-HGUT-00002/genomes1/GUT_GENOME067864.gff.gz	1
GUT_GENOME067864_01068	GUT_GENOME067864_01068	QBM20342.1	De-rhamnosylation	1	887	31	917	895	54.525	0	1012	99	4584774	374	27004	43.27	91.14	0.63	GUT_GENOME000004	d__Bacteria;p__Firmicutes_A;c__Clostridia;o__Lachnospirales;f__Lachnospiraceae;g__Blautia_A;s__Blautia_A sp900066165	ERS235584	ERP002469	Sweden	ftp://ftp.ebi.ac.uk/pub/databases/metagenomics/mgnify_genomes/human-gut/v1.0/all_genomes/MGYG-HGUT-000/MGYG-HGUT-00002/genomes1/GUT_GENOME067864.gff.gz	3
GUT_GENOME113177_00909	GUT_GENOME113177_00909	KEF28010.1	O-deglycosylation	1	748	1	748	748	99.064	0	1531	100	2030940	131	24155	59.53	96.5	0.37	GUT_GENOME142522	d__Bacteria;p__Actinobacteriota;c__Actinobacteria;o__Actinomycetales;f__Bifidobacteriaceae;g__Bifidobacterium;s__Bifidobacterium adolescentis	ERS328968	ERP003612	Denmark	ftp://ftp.ebi.ac.uk/pub/databases/metagenomics/mgnify_genomes/human-gut/v1.0/all_genomes/MGYG-HGUT-023/MGYG-HGUT-02395/genomes5/GUT_GENOME113177.gff.gz	1
GUT_GENOME160901_00916	GUT_GENOME160901_00916	KEF28010.1	O-deglycosylation	1	748	1	748	748	99.064	0	1533	100	1726103	223	11142	60.11	93.91	1.98	GUT_GENOME142522	d__Bacteria;p__Actinobacteriota;c__Actinobacteria;o__Actinomycetales;f__Bifidobacteriaceae;g__Bifidobacterium;s__Bifidobacterium adolescentis	SRS1876602	SRP095580	Netherlands	ftp://ftp.ebi.ac.uk/pub/databases/metagenomics/mgnify_genomes/human-gut/v1.0/all_genomes/MGYG-HGUT-023/MGYG-HGUT-02395/genomes5/GUT_GENOME160901.gff.gz	1
GUT_GENOME072992_02358	GUT_GENOME072992_02358	QBM20340.1	De-rhamnosylation	2	828	1	830	844	43.365	0	665	99	3505224	277	25338	43.42	84.65	1.85	GUT_GENOME000004	d__Bacteria;p__Firmicutes_A;c__Clostridia;o__Lachnospirales;f__Lachnospiraceae;g__Blautia_A;s__Blautia_A sp900066165	ERS396452	ERP004605	Spain	ftp://ftp.ebi.ac.uk/pub/databases/metagenomics/mgnify_genomes/human-gut/v1.0/all_genomes/MGYG-HGUT-000/MGYG-HGUT-00002/genomes1/GUT_GENOME072992.gff.gz	8
GUT_GENOME161575_00104	GUT_GENOME066371_00736	KEF28010.1	O-deglycosylation	1	748	1	748	748	99.064	0	1533	100	2220948	112	61028	59.55	99.61	1.14	GUT_GENOME142522	d__Bacteria;p__Actinobacteriota;c__Actinobacteria;o__Actinomycetales;f__Bifidobacteriaceae;g__Bifidobacterium;s__Bifidobacterium adolescentis	ERS235509	ERP002469	Sweden	ftp://ftp.ebi.ac.uk/pub/databases/metagenomics/mgnify_genomes/human-gut/v1.0/all_genomes/MGYG-HGUT-023/MGYG-HGUT-02395/genomes4/GUT_GENOME066371.gff.gz	7
GUT_GENOME197686_00712	GUT_GENOME197686_00712	KEF28010.1	O-deglycosylation	1	748	1	748	748	99.064	0	1533	100	1936218	138	20641	59.91	95.4	4.01	GUT_GENOME142522	d__Bacteria;p__Actinobacteriota;c__Actinobacteria;o__Actinomycetales;f__Bifidobacteriaceae;g__Bifidobacterium;s__Bifidobacterium adolescentis	SRS1876602	SRP095580	Netherlands	ftp://ftp.ebi.ac.uk/pub/databases/metagenomics/mgnify_genomes/human-gut/v1.0/all_genomes/MGYG-HGUT-023/MGYG-HGUT-02395/genomes4/GUT_GENOME197686.gff.gz	1
GUT_GENOME210351_00540	GUT_GENOME210351_00540	KEF28010.1	O-deglycosylation	1	748	1	748	748	99.064	0	1529	100	1423130	311	4768	59.7	73.25	2.41	GUT_GENOME142522	d__Bacteria;p__Actinobacteriota;c__Actinobacteria;o__Actinomycetales;f__Bifidobacteriaceae;g__Bifidobacterium;s__Bifidobacterium adolescentis	SRS1905935	SRP096283	United States	ftp://ftp.ebi.ac.uk/pub/databases/metagenomics/mgnify_genomes/human-gut/v1.0/all_genomes/MGYG-HGUT-023/MGYG-HGUT-02395/genomes2/GUT_GENOME210351.gff.gz	1
GUT_GENOME073081_00105	GUT_GENOME000485_00181	CCC80442.1	De-rhamnosylation	16	524	6	509	516	41.667	1.42e-135	412	97	4289261	69	129395	42.84	99.37	0	GUT_GENOME000004	d__Bacteria;p__Firmicutes_A;c__Clostridia;o__Lachnospirales;f__Lachnospiraceae;g__Blautia_A;s__Blautia_A sp900066165	ERS2046377	ERP105624	United Kingdom	ftp://ftp.ebi.ac.uk/pub/databases/metagenomics/mgnify_genomes/human-gut/v1.0/all_genomes/MGYG-HGUT-000/MGYG-HGUT-00002/genomes1/GUT_GENOME000485.gff.gz	144
GUT_GENOME253487_01441	GUT_GENOME253487_01441	KEF28010.1	O-deglycosylation	1	748	1	748	748	99.064	0	1531	100	1952851	155	18648	59.61	89.32	1.77	GUT_GENOME142522	d__Bacteria;p__Actinobacteriota;c__Actinobacteria;o__Actinomycetales;f__Bifidobacteriaceae;g__Bifidobacterium;s__Bifidobacterium adolescentis	ERS746890	ERP010700	United Kingdom	ftp://ftp.ebi.ac.uk/pub/databases/metagenomics/mgnify_genomes/human-gut/v1.0/all_genomes/MGYG-HGUT-023/MGYG-HGUT-02395/genomes4/GUT_GENOME253487.gff.gz	1
GUT_GENOME163057_01232	GUT_GENOME163057_01232	KEF28010.1	O-deglycosylation	143	748	1	606	606	99.01	0	1235	81	1959126	156	24697	59.87	96.8	0.83	GUT_GENOME142522	d__Bacteria;p__Actinobacteriota;c__Actinobacteria;o__Actinomycetales;f__Bifidobacteriaceae;g__Bifidobacterium;s__Bifidobacterium adolescentis	SRS1876583	SRP095580	Netherlands	ftp://ftp.ebi.ac.uk/pub/databases/metagenomics/mgnify_genomes/human-gut/v1.0/all_genomes/MGYG-HGUT-023/MGYG-HGUT-02395/genomes2/GUT_GENOME163057.gff.gz	1
GUT_GENOME073525_00696	GUT_GENOME073525_00696	ANI69961.1	O-demethylation	13	210	152	349	199	47.236	2.13e-51	187	94	2429973	360	11347	43.99	56.14	0	GUT_GENOME000004	d__Bacteria;p__Firmicutes_A;c__Clostridia;o__Lachnospirales;f__Lachnospiraceae;g__Blautia_A;s__Blautia_A sp900066165	ERS396477	ERP004605	Spain	ftp://ftp.ebi.ac.uk/pub/databases/metagenomics/mgnify_genomes/human-gut/v1.0/all_genomes/MGYG-HGUT-000/MGYG-HGUT-00002/genomes1/GUT_GENOME073525.gff.gz	2
GUT_GENOME075054_00587	GUT_GENOME075054_00587	CCC80442.1	De-rhamnosylation	4	523	3	521	527	43.264	2.97e-151	452	99	3479341	310	22536	43.41	92.07	3.16	GUT_GENOME000004	d__Bacteria;p__Firmicutes_A;c__Clostridia;o__Lachnospirales;f__Lachnospiraceae;g__Blautia_A;s__Blautia_A sp900066165	ERS396524	ERP004605	Spain	ftp://ftp.ebi.ac.uk/pub/databases/metagenomics/mgnify_genomes/human-gut/v1.0/all_genomes/MGYG-HGUT-000/MGYG-HGUT-00002/genomes1/GUT_GENOME075054.gff.gz	2
GUT_GENOME196363_01656	GUT_GENOME067620_00996	KEF28010.1	O-deglycosylation	143	748	1	606	606	99.01	0	1235	81	1453012	510	3422	60.14	72.22	1.36	GUT_GENOME142522	d__Bacteria;p__Actinobacteriota;c__Actinobacteria;o__Actinomycetales;f__Bifidobacteriaceae;g__Bifidobacterium;s__Bifidobacterium adolescentis	ERS235567	ERP002469	Sweden	ftp://ftp.ebi.ac.uk/pub/databases/metagenomics/mgnify_genomes/human-gut/v1.0/all_genomes/MGYG-HGUT-023/MGYG-HGUT-02395/genomes3/GUT_GENOME067620.gff.gz	4
GUT_GENOME043077_00307	GUT_GENOME043077_00307	KEF28010.1	O-deglycosylation	66	748	1	683	683	98.975	0	1396	91	1716209	278	7633	59.83	89.79	1.97	GUT_GENOME142522	d__Bacteria;p__Actinobacteriota;c__Actinobacteria;o__Actinomycetales;f__Bifidobacteriaceae;g__Bifidobacterium;s__Bifidobacterium adolescentis	ERS1069660	ERP013827	Netherlands	ftp://ftp.ebi.ac.uk/pub/databases/metagenomics/mgnify_genomes/human-gut/v1.0/all_genomes/MGYG-HGUT-023/MGYG-HGUT-02395/genomes5/GUT_GENOME043077.gff.gz	2
GUT_GENOME160185_00836	GUT_GENOME160185_00836	KEF28010.1	O-deglycosylation	66	748	1	683	683	98.975	0	1397	91	1921727	254	10724	59.86	92.21	1.76	GUT_GENOME142522	d__Bacteria;p__Actinobacteriota;c__Actinobacteria;o__Actinomycetales;f__Bifidobacteriaceae;g__Bifidobacterium;s__Bifidobacterium adolescentis	SRS1876358	SRP095580	Netherlands	ftp://ftp.ebi.ac.uk/pub/databases/metagenomics/mgnify_genomes/human-gut/v1.0/all_genomes/MGYG-HGUT-023/MGYG-HGUT-02395/genomes5/GUT_GENOME160185.gff.gz	1
GUT_GENOME077345_01766	GUT_GENOME077345_01766	CCC80442.1	De-rhamnosylation	4	523	3	521	525	43.429	2.01e-152	455	99	4145534	360	24316	43.03	90.78	4.49	GUT_GENOME000004	d__Bacteria;p__Firmicutes_A;c__Clostridia;o__Lachnospirales;f__Lachnospiraceae;g__Blautia_A;s__Blautia_A sp900066165	ERS473170	ERP005989	Sweden	ftp://ftp.ebi.ac.uk/pub/databases/metagenomics/mgnify_genomes/human-gut/v1.0/all_genomes/MGYG-HGUT-000/MGYG-HGUT-00002/genomes1/GUT_GENOME077345.gff.gz	1
GUT_GENOME162870_00539	GUT_GENOME162870_00539	KEF28001.1	O-deglycosylation	1	780	1	780	780	98.974	0	1582	100	2029834	23	120236	59.61	99.55	0	GUT_GENOME142522	d__Bacteria;p__Actinobacteriota;c__Actinobacteria;o__Actinomycetales;f__Bifidobacteriaceae;g__Bifidobacterium;s__Bifidobacterium adolescentis	SRS1876426	SRP095580	Netherlands	ftp://ftp.ebi.ac.uk/pub/databases/metagenomics/mgnify_genomes/human-gut/v1.0/all_genomes/MGYG-HGUT-023/MGYG-HGUT-02395/genomes3/GUT_GENOME162870.gff.gz	1
GUT_GENOME077599_02467	GUT_GENOME077599_02467	CCC80442.1	De-rhamnosylation	4	523	3	521	525	43.429	2.01e-152	455	99	3945648	547	10718	43.42	96.84	0.16	GUT_GENOME000004	d__Bacteria;p__Firmicutes_A;c__Clostridia;o__Lachnospirales;f__Lachnospiraceae;g__Blautia_A;s__Blautia_A sp900066165	ERS473192	ERP005989	Sweden	ftp://ftp.ebi.ac.uk/pub/databases/metagenomics/mgnify_genomes/human-gut/v1.0/all_genomes/MGYG-HGUT-000/MGYG-HGUT-00002/genomes1/GUT_GENOME077599.gff.gz	1
GUT_GENOME056239_01286	GUT_GENOME056239_01286	KEF28010.1	O-deglycosylation	93	748	1	656	656	98.933	0	1342	88	1787272	253	8785	59.5	89.22	3.61	GUT_GENOME142522	d__Bacteria;p__Actinobacteriota;c__Actinobacteria;o__Actinomycetales;f__Bifidobacteriaceae;g__Bifidobacterium;s__Bifidobacterium adolescentis	ERS396364	ERP004605	Denmark	ftp://ftp.ebi.ac.uk/pub/databases/metagenomics/mgnify_genomes/human-gut/v1.0/all_genomes/MGYG-HGUT-023/MGYG-HGUT-02395/genomes4/GUT_GENOME056239.gff.gz	1
GUT_GENOME078126_00253	GUT_GENOME000251_00925	ANI69962.1	O-demethylation	2	257	1	255	257	40.078	5.21e-56	203	94	4542778	86	120234	42.69	98.73	0.63	GUT_GENOME000004	d__Bacteria;p__Firmicutes_A;c__Clostridia;o__Lachnospirales;f__Lachnospiraceae;g__Blautia_A;s__Blautia_A sp900066165	ERS852522	ERP012217	United Kingdom	ftp://ftp.ebi.ac.uk/pub/databases/metagenomics/mgnify_genomes/human-gut/v1.0/all_genomes/MGYG-HGUT-000/MGYG-HGUT-00002/genomes1/GUT_GENOME000251.gff.gz	11
GUT_GENOME022866_01267	GUT_GENOME022866_01267	KEF28010.1	O-deglycosylation	1	748	1	748	748	98.93	0	1531	100	1764269	164	16128	60.03	90.16	0.77	GUT_GENOME142522	d__Bacteria;p__Actinobacteriota;c__Actinobacteria;o__Actinomycetales;f__Bifidobacteriaceae;g__Bifidobacterium;s__Bifidobacterium adolescentis	ERS1444497	ERP019502	Kazakhstan	ftp://ftp.ebi.ac.uk/pub/databases/metagenomics/mgnify_genomes/human-gut/v1.0/all_genomes/MGYG-HGUT-023/MGYG-HGUT-02395/genomes3/GUT_GENOME022866.gff.gz	1
GUT_GENOME079251_02520	GUT_GENOME079251_02520	CCC80442.1	De-rhamnosylation	4	523	3	521	525	43.238	9.69e-152	453	99	3906824	291	28011	43.32	89.2	3.38	GUT_GENOME000004	d__Bacteria;p__Firmicutes_A;c__Clostridia;o__Lachnospirales;f__Lachnospiraceae;g__Blautia_A;s__Blautia_A sp900066165	ERS473322	ERP005989	Sweden	ftp://ftp.ebi.ac.uk/pub/databases/metagenomics/mgnify_genomes/human-gut/v1.0/all_genomes/MGYG-HGUT-000/MGYG-HGUT-00002/genomes1/GUT_GENOME079251.gff.gz	1
GUT_GENOME079251_02557	GUT_GENOME061775_00138	ANI69962.1	O-demethylation	2	257	1	255	257	40.078	1.43e-55	202	94	3582772	173	35589	43.08	92.25	0	GUT_GENOME000004	d__Bacteria;p__Firmicutes_A;c__Clostridia;o__Lachnospirales;f__Lachnospiraceae;g__Blautia_A;s__Blautia_A sp900066165	ERS473322	ERP005989	Denmark	ftp://ftp.ebi.ac.uk/pub/databases/metagenomics/mgnify_genomes/human-gut/v1.0/all_genomes/MGYG-HGUT-000/MGYG-HGUT-00002/genomes1/GUT_GENOME061775.gff.gz	2
GUT_GENOME062289_00775	GUT_GENOME006569_00738	KEF28010.1	O-deglycosylation	1	748	1	748	748	98.93	0	1523	100	1973180	96	32217	59.51	91.17	0	GUT_GENOME142522	d__Bacteria;p__Actinobacteriota;c__Actinobacteria;o__Actinomycetales;f__Bifidobacteriaceae;g__Bifidobacterium;s__Bifidobacterium adolescentis	ERS473364	ERP005989	Sweden	ftp://ftp.ebi.ac.uk/pub/databases/metagenomics/mgnify_genomes/human-gut/v1.0/all_genomes/MGYG-HGUT-023/MGYG-HGUT-02395/genomes3/GUT_GENOME006569.gff.gz	3
GUT_GENOME066937_00089	GUT_GENOME066937_00089	KEF28010.1	O-deglycosylation	1	748	1	748	748	98.93	0	1527	100	1642907	229	8376	60.03	83.37	1.74	GUT_GENOME142522	d__Bacteria;p__Actinobacteriota;c__Actinobacteria;o__Actinomycetales;f__Bifidobacteriaceae;g__Bifidobacterium;s__Bifidobacterium adolescentis	ERS235540	ERP002469	Sweden	ftp://ftp.ebi.ac.uk/pub/databases/metagenomics/mgnify_genomes/human-gut/v1.0/all_genomes/MGYG-HGUT-023/MGYG-HGUT-02395/genomes2/GUT_GENOME066937.gff.gz	1
GUT_GENOME089854_01391	GUT_GENOME089854_01391	KEF28010.1	O-deglycosylation	1	748	1	748	748	98.93	0	1530	100	1928630	162	24413	59.9	98.65	2.08	GUT_GENOME142522	d__Bacteria;p__Actinobacteriota;c__Actinobacteria;o__Actinomycetales;f__Bifidobacteriaceae;g__Bifidobacterium;s__Bifidobacterium adolescentis	ERS608591	ERP008729	Austria	ftp://ftp.ebi.ac.uk/pub/databases/metagenomics/mgnify_genomes/human-gut/v1.0/all_genomes/MGYG-HGUT-023/MGYG-HGUT-02395/genomes1/GUT_GENOME089854.gff.gz	1
GUT_GENOME129102_00788	GUT_GENOME025361_00781	KEF28010.1	O-deglycosylation	1	748	1	748	748	98.93	0	1531	100	1102616	12	153813	58.8	55.68	0	GUT_GENOME142522	d__Bacteria;p__Actinobacteriota;c__Actinobacteria;o__Actinomycetales;f__Bifidobacteriaceae;g__Bifidobacterium;s__Bifidobacterium adolescentis	ERS1444577	ERP019502	Kazakhstan	ftp://ftp.ebi.ac.uk/pub/databases/metagenomics/mgnify_genomes/human-gut/v1.0/all_genomes/MGYG-HGUT-023/MGYG-HGUT-02395/genomes5/GUT_GENOME025361.gff.gz	17
GUT_GENOME081535_00996	GUT_GENOME081535_00996	ANI69962.1	O-demethylation	2	257	1	255	257	40.078	5.06e-56	203	94	3471223	446	10347	43.15	96.84	0.63	GUT_GENOME000004	d__Bacteria;p__Firmicutes_A;c__Clostridia;o__Lachnospirales;f__Lachnospiraceae;g__Blautia_A;s__Blautia_A sp900066165	ERS537217	ERP006678	China	ftp://ftp.ebi.ac.uk/pub/databases/metagenomics/mgnify_genomes/human-gut/v1.0/all_genomes/MGYG-HGUT-000/MGYG-HGUT-00002/genomes1/GUT_GENOME081535.gff.gz	1
GUT_GENOME129412_00533	GUT_GENOME129412_00533	KEF28010.1	O-deglycosylation	1	748	1	748	748	98.93	0	1527	100	1554653	310	6411	60.5	84.91	0.91	GUT_GENOME142522	d__Bacteria;p__Actinobacteriota;c__Actinobacteria;o__Actinomycetales;f__Bifidobacteriaceae;g__Bifidobacterium;s__Bifidobacterium adolescentis	SRS1596867	SRP080787	Mongolia	ftp://ftp.ebi.ac.uk/pub/databases/metagenomics/mgnify_genomes/human-gut/v1.0/all_genomes/MGYG-HGUT-023/MGYG-HGUT-02395/genomes5/GUT_GENOME129412.gff.gz	1
GUT_GENOME142516_01524	GUT_GENOME142516_01524	KEF28010.1	O-deglycosylation	1	748	1	748	748	98.93	0	1530	100	2381816	26	381395	59.93	100	0	GUT_GENOME142522	d__Bacteria;p__Actinobacteriota;c__Actinobacteria;o__Actinomycetales;f__Bifidobacteriaceae;g__Bifidobacterium;s__Bifidobacterium adolescentis	SAMN04231312	PRJNA300965	Italy	ftp://ftp.ebi.ac.uk/pub/databases/metagenomics/mgnify_genomes/human-gut/v1.0/all_genomes/MGYG-HGUT-023/MGYG-HGUT-02395/genomes2/GUT_GENOME142516.gff.gz	1
GUT_GENOME068579_01044	GUT_GENOME051955_00350	KEF28010.1	O-deglycosylation	1	748	1	748	748	98.797	0	1525	100	1766450	259	8095	59.34	82.41	4.85	GUT_GENOME142522	d__Bacteria;p__Actinobacteriota;c__Actinobacteria;o__Actinomycetales;f__Bifidobacteriaceae;g__Bifidobacterium;s__Bifidobacterium adolescentis	ERS199209	ERP002061	Spain	ftp://ftp.ebi.ac.uk/pub/databases/metagenomics/mgnify_genomes/human-gut/v1.0/all_genomes/MGYG-HGUT-023/MGYG-HGUT-02395/genomes3/GUT_GENOME051955.gff.gz	11
GUT_GENOME081588_01153	GUT_GENOME081588_01153	CCC80442.1	De-rhamnosylation	4	523	3	521	525	42.857	8.6e-150	448	99	3950388	272	34041	42.96	94.38	1.01	GUT_GENOME000004	d__Bacteria;p__Firmicutes_A;c__Clostridia;o__Lachnospirales;f__Lachnospiraceae;g__Blautia_A;s__Blautia_A sp900066165	ERS537219	ERP006678	China	ftp://ftp.ebi.ac.uk/pub/databases/metagenomics/mgnify_genomes/human-gut/v1.0/all_genomes/MGYG-HGUT-000/MGYG-HGUT-00002/genomes1/GUT_GENOME081588.gff.gz	1
GUT_GENOME160330_00944	GUT_GENOME160330_00944	KEF28010.1	O-deglycosylation	1	748	1	748	748	98.797	0	1526	100	1830556	170	15529	59.86	92.59	0.45	GUT_GENOME142522	d__Bacteria;p__Actinobacteriota;c__Actinobacteria;o__Actinomycetales;f__Bifidobacteriaceae;g__Bifidobacterium;s__Bifidobacterium adolescentis	SRS1876582	SRP095580	Netherlands	ftp://ftp.ebi.ac.uk/pub/databases/metagenomics/mgnify_genomes/human-gut/v1.0/all_genomes/MGYG-HGUT-023/MGYG-HGUT-02395/genomes2/GUT_GENOME160330.gff.gz	1
GUT_GENOME161902_00886	GUT_GENOME161902_00886	KEF28010.1	O-deglycosylation	1	748	1	748	748	98.797	0	1529	100	1963567	136	27691	59.8	95.96	0.23	GUT_GENOME142522	d__Bacteria;p__Actinobacteriota;c__Actinobacteria;o__Actinomycetales;f__Bifidobacteriaceae;g__Bifidobacterium;s__Bifidobacterium adolescentis	SRS1876391	SRP095580	Netherlands	ftp://ftp.ebi.ac.uk/pub/databases/metagenomics/mgnify_genomes/human-gut/v1.0/all_genomes/MGYG-HGUT-023/MGYG-HGUT-02395/genomes3/GUT_GENOME161902.gff.gz	1
GUT_GENOME162208_00354	GUT_GENOME162208_00354	KEF28010.1	O-deglycosylation	1	748	1	748	748	98.797	0	1529	100	2051117	179	17570	59.69	93.64	1.85	GUT_GENOME142522	d__Bacteria;p__Actinobacteriota;c__Actinobacteria;o__Actinomycetales;f__Bifidobacteriaceae;g__Bifidobacterium;s__Bifidobacterium adolescentis	SRS1876324	SRP095580	Netherlands	ftp://ftp.ebi.ac.uk/pub/databases/metagenomics/mgnify_genomes/human-gut/v1.0/all_genomes/MGYG-HGUT-023/MGYG-HGUT-02395/genomes5/GUT_GENOME162208.gff.gz	1
GUT_GENOME173913_00909	GUT_GENOME132181_00909	KEF28010.1	O-deglycosylation	1	748	1	748	748	98.797	0	1528	100	1915204	304	8683	59.69	92.64	1.74	GUT_GENOME142522	d__Bacteria;p__Actinobacteriota;c__Actinobacteria;o__Actinomycetales;f__Bifidobacteriaceae;g__Bifidobacterium;s__Bifidobacterium adolescentis	NA	NA	Germany	ftp://ftp.ebi.ac.uk/pub/databases/metagenomics/mgnify_genomes/human-gut/v1.0/all_genomes/MGYG-HGUT-023/MGYG-HGUT-02395/genomes5/GUT_GENOME132181.gff.gz	2
GUT_GENOME181992_00880	GUT_GENOME181992_00880	KEF28010.1	O-deglycosylation	1	748	1	748	748	98.797	0	1528	100	1869272	239	9810	59.74	90.29	1.53	GUT_GENOME142522	d__Bacteria;p__Actinobacteriota;c__Actinobacteria;o__Actinomycetales;f__Bifidobacteriaceae;g__Bifidobacterium;s__Bifidobacterium adolescentis	SRS1719146	SRP090628	Russia	ftp://ftp.ebi.ac.uk/pub/databases/metagenomics/mgnify_genomes/human-gut/v1.0/all_genomes/MGYG-HGUT-023/MGYG-HGUT-02395/genomes1/GUT_GENOME181992.gff.gz	2
GUT_GENOME183262_00724	GUT_GENOME183262_00724	KEF28010.1	O-deglycosylation	1	748	1	748	748	98.797	0	1528	100	1628676	25	119543	59.32	75.91	0.08	GUT_GENOME142522	d__Bacteria;p__Actinobacteriota;c__Actinobacteria;o__Actinomycetales;f__Bifidobacteriaceae;g__Bifidobacterium;s__Bifidobacterium adolescentis	SRS1719512	SRP090628	Russia	ftp://ftp.ebi.ac.uk/pub/databases/metagenomics/mgnify_genomes/human-gut/v1.0/all_genomes/MGYG-HGUT-023/MGYG-HGUT-02395/genomes1/GUT_GENOME183262.gff.gz	3
GUT_GENOME196994_00166	GUT_GENOME196994_00166	KEF28010.1	O-deglycosylation	1	748	1	748	748	98.797	0	1528	100	1402370	245	6682	60	73.58	2.16	GUT_GENOME142522	d__Bacteria;p__Actinobacteriota;c__Actinobacteria;o__Actinomycetales;f__Bifidobacteriaceae;g__Bifidobacterium;s__Bifidobacterium adolescentis	SRS1876477	SRP095580	Netherlands	ftp://ftp.ebi.ac.uk/pub/databases/metagenomics/mgnify_genomes/human-gut/v1.0/all_genomes/MGYG-HGUT-023/MGYG-HGUT-02395/genomes1/GUT_GENOME196994.gff.gz	1
GUT_GENOME205019_00686	GUT_GENOME205019_00686	KEF28010.1	O-deglycosylation	1	748	1	748	748	98.797	0	1524	100	1527012	212	9235	60.24	80.89	0.88	GUT_GENOME142522	d__Bacteria;p__Actinobacteriota;c__Actinobacteria;o__Actinomycetales;f__Bifidobacteriaceae;g__Bifidobacterium;s__Bifidobacterium adolescentis	SRS1996016	SRP100518	Spain	ftp://ftp.ebi.ac.uk/pub/databases/metagenomics/mgnify_genomes/human-gut/v1.0/all_genomes/MGYG-HGUT-023/MGYG-HGUT-02395/genomes4/GUT_GENOME205019.gff.gz	1
GUT_GENOME086144_00115	GUT_GENOME086144_00115	ANI69962.1	O-demethylation	2	257	1	255	257	40.078	5.87e-56	203	94	3049336	454	7898	43.75	80.09	4.8	GUT_GENOME000004	d__Bacteria;p__Firmicutes_A;c__Clostridia;o__Lachnospirales;f__Lachnospiraceae;g__Blautia_A;s__Blautia_A sp900066165	ERS537379	ERP006678	China	ftp://ftp.ebi.ac.uk/pub/databases/metagenomics/mgnify_genomes/human-gut/v1.0/all_genomes/MGYG-HGUT-000/MGYG-HGUT-00002/genomes1/GUT_GENOME086144.gff.gz	1
GUT_GENOME086144_00180	GUT_GENOME064179_01629	QBM20342.1	De-rhamnosylation	1	887	1	887	895	54.525	0	1012	99	3639366	164	33827	43.05	94.59	0.97	GUT_GENOME000004	d__Bacteria;p__Firmicutes_A;c__Clostridia;o__Lachnospirales;f__Lachnospiraceae;g__Blautia_A;s__Blautia_A sp900066165	ERS537408	ERP006678	China	ftp://ftp.ebi.ac.uk/pub/databases/metagenomics/mgnify_genomes/human-gut/v1.0/all_genomes/MGYG-HGUT-000/MGYG-HGUT-00002/genomes1/GUT_GENOME064179.gff.gz	2
GUT_GENOME258355_00953	GUT_GENOME258355_00953	KEF28010.1	O-deglycosylation	1	748	1	748	748	98.797	0	1528	100	1230269	16	119290	59.47	56.14	0	GUT_GENOME142522	d__Bacteria;p__Actinobacteriota;c__Actinobacteria;o__Actinomycetales;f__Bifidobacteriaceae;g__Bifidobacterium;s__Bifidobacterium adolescentis	ERS746805	ERP010700	United Kingdom	ftp://ftp.ebi.ac.uk/pub/databases/metagenomics/mgnify_genomes/human-gut/v1.0/all_genomes/MGYG-HGUT-023/MGYG-HGUT-02395/genomes2/GUT_GENOME258355.gff.gz	1
GUT_GENOME265380_01056	GUT_GENOME265380_01056	KEF28010.1	O-deglycosylation	1	748	1	748	748	98.797	0	1526	100	1635240	383	5071	59.94	87.46	3.57	GUT_GENOME142522	d__Bacteria;p__Actinobacteriota;c__Actinobacteria;o__Actinomycetales;f__Bifidobacteriaceae;g__Bifidobacterium;s__Bifidobacterium adolescentis	ERS971745	ERP012929	Israel	ftp://ftp.ebi.ac.uk/pub/databases/metagenomics/mgnify_genomes/human-gut/v1.0/all_genomes/MGYG-HGUT-023/MGYG-HGUT-02395/genomes2/GUT_GENOME265380.gff.gz	1
GUT_GENOME087311_00541	GUT_GENOME087311_00541	QBM20340.1	De-rhamnosylation	4	828	2	834	850	42.588	0	637	99	1953430	245	14706	44.85	61.39	0.95	GUT_GENOME000004	d__Bacteria;p__Firmicutes_A;c__Clostridia;o__Lachnospirales;f__Lachnospiraceae;g__Blautia_A;s__Blautia_A sp900066165	ERS608490	ERP008729	Austria	ftp://ftp.ebi.ac.uk/pub/databases/metagenomics/mgnify_genomes/human-gut/v1.0/all_genomes/MGYG-HGUT-000/MGYG-HGUT-00002/genomes1/GUT_GENOME087311.gff.gz	1
GUT_GENOME087601_01082	GUT_GENOME087601_01082	CCC80442.1	De-rhamnosylation	4	523	3	521	525	42.857	1.08e-149	448	99	2206794	459	7457	44.43	72.66	1.48	GUT_GENOME000004	d__Bacteria;p__Firmicutes_A;c__Clostridia;o__Lachnospirales;f__Lachnospiraceae;g__Blautia_A;s__Blautia_A sp900066165	ERS608501	ERP008729	Austria	ftp://ftp.ebi.ac.uk/pub/databases/metagenomics/mgnify_genomes/human-gut/v1.0/all_genomes/MGYG-HGUT-000/MGYG-HGUT-00002/genomes1/GUT_GENOME087601.gff.gz	1
GUT_GENOME087601_01185	GUT_GENOME064849_01149	QBM20342.1	De-rhamnosylation	1	887	1	887	895	54.637	0	1015	99	2462455	326	9088	43.79	65.29	1.75	GUT_GENOME000004	d__Bacteria;p__Firmicutes_A;c__Clostridia;o__Lachnospirales;f__Lachnospiraceae;g__Blautia_A;s__Blautia_A sp900066165	ERS608501	ERP008729	Austria	ftp://ftp.ebi.ac.uk/pub/databases/metagenomics/mgnify_genomes/human-gut/v1.0/all_genomes/MGYG-HGUT-000/MGYG-HGUT-00002/genomes1/GUT_GENOME064849.gff.gz	2
GUT_GENOME087868_02864	GUT_GENOME087868_02864	CCC80442.1	De-rhamnosylation	4	523	3	521	525	43.238	1.78e-151	452	99	3890132	331	27610	43.09	90.79	0.84	GUT_GENOME000004	d__Bacteria;p__Firmicutes_A;c__Clostridia;o__Lachnospirales;f__Lachnospiraceae;g__Blautia_A;s__Blautia_A sp900066165	ERS608511	ERP008729	Austria	ftp://ftp.ebi.ac.uk/pub/databases/metagenomics/mgnify_genomes/human-gut/v1.0/all_genomes/MGYG-HGUT-000/MGYG-HGUT-00002/genomes1/GUT_GENOME087868.gff.gz	1
GUT_GENOME087868_02902	GUT_GENOME087868_02902	ANI69962.1	O-demethylation	2	257	1	255	257	40.078	6.17e-56	203	94	3890132	331	27610	43.09	90.79	0.84	GUT_GENOME000004	d__Bacteria;p__Firmicutes_A;c__Clostridia;o__Lachnospirales;f__Lachnospiraceae;g__Blautia_A;s__Blautia_A sp900066165	ERS608511	ERP008729	Austria	ftp://ftp.ebi.ac.uk/pub/databases/metagenomics/mgnify_genomes/human-gut/v1.0/all_genomes/MGYG-HGUT-000/MGYG-HGUT-00002/genomes1/GUT_GENOME087868.gff.gz	3
GUT_GENOME087908_00209	GUT_GENOME087908_00209	CCC80442.1	De-rhamnosylation	4	523	3	521	525	43.238	9.69e-152	453	99	2781030	444	10091	43.31	58.34	0	GUT_GENOME000004	d__Bacteria;p__Firmicutes_A;c__Clostridia;o__Lachnospirales;f__Lachnospiraceae;g__Blautia_A;s__Blautia_A sp900066165	ERS608513	ERP008729	Austria	ftp://ftp.ebi.ac.uk/pub/databases/metagenomics/mgnify_genomes/human-gut/v1.0/all_genomes/MGYG-HGUT-000/MGYG-HGUT-00002/genomes1/GUT_GENOME087908.gff.gz	1
GUT_GENOME128303_01247	GUT_GENOME128303_01247	KEF28010.1	O-deglycosylation	93	748	1	656	656	98.78	0	1340	88	1741915	150	18102	60.16	91.08	0.45	GUT_GENOME142522	d__Bacteria;p__Actinobacteriota;c__Actinobacteria;o__Actinomycetales;f__Bifidobacteriaceae;g__Bifidobacterium;s__Bifidobacterium adolescentis	SRS1596820	SRP080787	Mongolia	ftp://ftp.ebi.ac.uk/pub/databases/metagenomics/mgnify_genomes/human-gut/v1.0/all_genomes/MGYG-HGUT-023/MGYG-HGUT-02395/genomes4/GUT_GENOME128303.gff.gz	1
GUT_GENOME088098_02026	GUT_GENOME088098_02026	CCC80442.1	De-rhamnosylation	4	523	3	521	525	43.048	2.81e-150	449	99	2539490	549	6729	44.45	76.55	4.91	GUT_GENOME000004	d__Bacteria;p__Firmicutes_A;c__Clostridia;o__Lachnospirales;f__Lachnospiraceae;g__Blautia_A;s__Blautia_A sp900066165	ERS608522	ERP008729	Austria	ftp://ftp.ebi.ac.uk/pub/databases/metagenomics/mgnify_genomes/human-gut/v1.0/all_genomes/MGYG-HGUT-000/MGYG-HGUT-00002/genomes1/GUT_GENOME088098.gff.gz	1
GUT_GENOME088261_00637	GUT_GENOME007787_00369	CCC80440.1	De-rhamnosylation	9	628	6	643	639	45.07	0	589	95	3781825	150	49308	43.17	99.15	1.27	GUT_GENOME000004	d__Bacteria;p__Firmicutes_A;c__Clostridia;o__Lachnospirales;f__Lachnospiraceae;g__Blautia_A;s__Blautia_A sp900066165	ERS554207	ERP007090	Sweden	ftp://ftp.ebi.ac.uk/pub/databases/metagenomics/mgnify_genomes/human-gut/v1.0/all_genomes/MGYG-HGUT-000/MGYG-HGUT-00002/genomes1/GUT_GENOME007787.gff.gz	8
GUT_GENOME067328_00901	GUT_GENOME067328_00901	KEF28001.1	O-deglycosylation	1	780	1	780	780	98.718	0	1578	100	2052734	40	198371	59.6	100	0	GUT_GENOME142522	d__Bacteria;p__Actinobacteriota;c__Actinobacteria;o__Actinomycetales;f__Bifidobacteriaceae;g__Bifidobacterium;s__Bifidobacterium adolescentis	ERS235555	ERP002469	Sweden	ftp://ftp.ebi.ac.uk/pub/databases/metagenomics/mgnify_genomes/human-gut/v1.0/all_genomes/MGYG-HGUT-023/MGYG-HGUT-02395/genomes3/GUT_GENOME067328.gff.gz	1
GUT_GENOME088261_01694	GUT_GENOME088261_01694	CCC80442.1	De-rhamnosylation	4	523	3	521	525	43.238	7.97e-152	454	99	2950610	233	26245	43.39	76.76	1.58	GUT_GENOME000004	d__Bacteria;p__Firmicutes_A;c__Clostridia;o__Lachnospirales;f__Lachnospiraceae;g__Blautia_A;s__Blautia_A sp900066165	ERS608529	ERP008729	Austria	ftp://ftp.ebi.ac.uk/pub/databases/metagenomics/mgnify_genomes/human-gut/v1.0/all_genomes/MGYG-HGUT-000/MGYG-HGUT-00002/genomes1/GUT_GENOME088261.gff.gz	1
GUT_GENOME062411_00475	GUT_GENOME062411_00475	KEF28010.1	O-deglycosylation	143	748	1	606	606	98.68	0	1233	81	1854266	88	36790	59.86	94.63	0.45	GUT_GENOME142522	d__Bacteria;p__Actinobacteriota;c__Actinobacteria;o__Actinomycetales;f__Bifidobacteriaceae;g__Bifidobacterium;s__Bifidobacterium adolescentis	ERS473374	ERP005989	Denmark	ftp://ftp.ebi.ac.uk/pub/databases/metagenomics/mgnify_genomes/human-gut/v1.0/all_genomes/MGYG-HGUT-023/MGYG-HGUT-02395/genomes1/GUT_GENOME062411.gff.gz	1
GUT_GENOME162562_00471	GUT_GENOME162562_00471	KEF28010.1	O-deglycosylation	148	748	1	601	601	98.669	0	1223	80	1780334	358	6303	59.64	89.07	1.68	GUT_GENOME142522	d__Bacteria;p__Actinobacteriota;c__Actinobacteria;o__Actinomycetales;f__Bifidobacteriaceae;g__Bifidobacterium;s__Bifidobacterium adolescentis	SRS1876301	SRP095580	Netherlands	ftp://ftp.ebi.ac.uk/pub/databases/metagenomics/mgnify_genomes/human-gut/v1.0/all_genomes/MGYG-HGUT-023/MGYG-HGUT-02395/genomes3/GUT_GENOME162562.gff.gz	1
GUT_GENOME088576_00576	GUT_GENOME088576_00576	CCC80442.1	De-rhamnosylation	4	523	3	521	525	43.238	9.69e-152	453	99	2575696	468	8367	44.25	72.91	0.95	GUT_GENOME000004	d__Bacteria;p__Firmicutes_A;c__Clostridia;o__Lachnospirales;f__Lachnospiraceae;g__Blautia_A;s__Blautia_A sp900066165	ERS608544	ERP008729	Austria	ftp://ftp.ebi.ac.uk/pub/databases/metagenomics/mgnify_genomes/human-gut/v1.0/all_genomes/MGYG-HGUT-000/MGYG-HGUT-00002/genomes1/GUT_GENOME088576.gff.gz	1
GUT_GENOME088576_00958	GUT_GENOME088576_00958	ANI69962.1	O-demethylation	2	257	1	255	257	40.078	9.28e-56	202	94	2575696	468	8367	44.25	72.91	0.95	GUT_GENOME000004	d__Bacteria;p__Firmicutes_A;c__Clostridia;o__Lachnospirales;f__Lachnospiraceae;g__Blautia_A;s__Blautia_A sp900066165	ERS608544	ERP008729	Austria	ftp://ftp.ebi.ac.uk/pub/databases/metagenomics/mgnify_genomes/human-gut/v1.0/all_genomes/MGYG-HGUT-000/MGYG-HGUT-00002/genomes1/GUT_GENOME088576.gff.gz	1
GUT_GENOME089071_00303	GUT_GENOME064422_00526	QBM20342.1	De-rhamnosylation	1	887	1	887	895	54.749	0	1016	99	3417587	180	28725	43.36	85.09	4.22	GUT_GENOME000004	d__Bacteria;p__Firmicutes_A;c__Clostridia;o__Lachnospirales;f__Lachnospiraceae;g__Blautia_A;s__Blautia_A sp900066165	ERS608563	ERP008729	Austria	ftp://ftp.ebi.ac.uk/pub/databases/metagenomics/mgnify_genomes/human-gut/v1.0/all_genomes/MGYG-HGUT-000/MGYG-HGUT-00002/genomes1/GUT_GENOME064422.gff.gz	4
GUT_GENOME089071_01020	GUT_GENOME089071_01020	CCC80442.1	De-rhamnosylation	4	523	3	521	525	43.238	9.69e-152	453	99	3269284	196	28718	43.79	85.81	2.85	GUT_GENOME000004	d__Bacteria;p__Firmicutes_A;c__Clostridia;o__Lachnospirales;f__Lachnospiraceae;g__Blautia_A;s__Blautia_A sp900066165	ERS608563	ERP008729	Austria	ftp://ftp.ebi.ac.uk/pub/databases/metagenomics/mgnify_genomes/human-gut/v1.0/all_genomes/MGYG-HGUT-000/MGYG-HGUT-00002/genomes1/GUT_GENOME089071.gff.gz	1
GUT_GENOME074003_00874	GUT_GENOME074003_00874	KEF28010.1	O-deglycosylation	1	748	1	748	748	98.663	0	1523	100	1924158	122	22809	59.97	97.5	0.45	GUT_GENOME142522	d__Bacteria;p__Actinobacteriota;c__Actinobacteria;o__Actinomycetales;f__Bifidobacteriaceae;g__Bifidobacterium;s__Bifidobacterium adolescentis	ERS396493	ERP004605	Spain	ftp://ftp.ebi.ac.uk/pub/databases/metagenomics/mgnify_genomes/human-gut/v1.0/all_genomes/MGYG-HGUT-023/MGYG-HGUT-02395/genomes1/GUT_GENOME074003.gff.gz	1
GUT_GENOME088398_00050	GUT_GENOME088398_00050	KEF28010.1	O-deglycosylation	1	748	1	748	748	98.663	0	1523	100	2146135	190	20948	59.42	97.07	1.12	GUT_GENOME142522	d__Bacteria;p__Actinobacteriota;c__Actinobacteria;o__Actinomycetales;f__Bifidobacteriaceae;g__Bifidobacterium;s__Bifidobacterium adolescentis	ERS608535	ERP008729	Austria	ftp://ftp.ebi.ac.uk/pub/databases/metagenomics/mgnify_genomes/human-gut/v1.0/all_genomes/MGYG-HGUT-023/MGYG-HGUT-02395/genomes3/GUT_GENOME088398.gff.gz	1
GUT_GENOME089916_00058	GUT_GENOME066291_00277	CCC80442.1	De-rhamnosylation	4	523	3	521	527	43.264	9.08e-151	451	99	3768585	277	29846	43.35	93.04	0	GUT_GENOME000004	d__Bacteria;p__Firmicutes_A;c__Clostridia;o__Lachnospirales;f__Lachnospiraceae;g__Blautia_A;s__Blautia_A sp900066165	ERS235505	ERP002469	Sweden	ftp://ftp.ebi.ac.uk/pub/databases/metagenomics/mgnify_genomes/human-gut/v1.0/all_genomes/MGYG-HGUT-000/MGYG-HGUT-00002/genomes1/GUT_GENOME066291.gff.gz	5
GUT_GENOME089916_00456	GUT_GENOME089916_00456	QBM20342.1	De-rhamnosylation	1	887	31	917	895	54.637	0	1014	99	3159548	810	5451	43.59	81.11	3.59	GUT_GENOME000004	d__Bacteria;p__Firmicutes_A;c__Clostridia;o__Lachnospirales;f__Lachnospiraceae;g__Blautia_A;s__Blautia_A sp900066165	ERS608593	ERP008729	Austria	ftp://ftp.ebi.ac.uk/pub/databases/metagenomics/mgnify_genomes/human-gut/v1.0/all_genomes/MGYG-HGUT-000/MGYG-HGUT-00002/genomes1/GUT_GENOME089916.gff.gz	1
GUT_GENOME162762_00089	GUT_GENOME162762_00089	KEF28010.1	O-deglycosylation	1	748	1	748	748	98.663	0	1525	100	2105537	202	15769	59.59	96.9	4.26	GUT_GENOME142522	d__Bacteria;p__Actinobacteriota;c__Actinobacteria;o__Actinomycetales;f__Bifidobacteriaceae;g__Bifidobacterium;s__Bifidobacterium adolescentis	SRS1876308	SRP095580	Netherlands	ftp://ftp.ebi.ac.uk/pub/databases/metagenomics/mgnify_genomes/human-gut/v1.0/all_genomes/MGYG-HGUT-023/MGYG-HGUT-02395/genomes4/GUT_GENOME162762.gff.gz	1
GUT_GENOME090597_02664	GUT_GENOME000126_00593	QBM20342.1	De-rhamnosylation	1	887	31	917	895	54.749	0	1018	99	4245524	109	82751	42.82	99.37	0	GUT_GENOME000004	d__Bacteria;p__Firmicutes_A;c__Clostridia;o__Lachnospirales;f__Lachnospiraceae;g__Blautia_A;s__Blautia_A sp900066165	ERS852401	ERP012217	United Kingdom	ftp://ftp.ebi.ac.uk/pub/databases/metagenomics/mgnify_genomes/human-gut/v1.0/all_genomes/MGYG-HGUT-000/MGYG-HGUT-00002/genomes1/GUT_GENOME000126.gff.gz	128
GUT_GENOME239852_00902	GUT_GENOME239852_00902	KEF28010.1	O-deglycosylation	1	748	1	748	748	98.663	0	1524	100	1935517	215	12333	59.85	88.37	2.5	GUT_GENOME142522	d__Bacteria;p__Actinobacteriota;c__Actinobacteria;o__Actinomycetales;f__Bifidobacteriaceae;g__Bifidobacterium;s__Bifidobacterium adolescentis	SRS1719089	SRP090628	Russia	ftp://ftp.ebi.ac.uk/pub/databases/metagenomics/mgnify_genomes/human-gut/v1.0/all_genomes/MGYG-HGUT-023/MGYG-HGUT-02395/genomes4/GUT_GENOME239852.gff.gz	1
GUT_GENOME090938_01765	GUT_GENOME064285_00548	CCC80440.1	De-rhamnosylation	9	624	6	669	664	42.771	0	580	94	3434955	457	9509	43.16	82.56	4.51	GUT_GENOME000004	d__Bacteria;p__Firmicutes_A;c__Clostridia;o__Lachnospirales;f__Lachnospiraceae;g__Blautia_A;s__Blautia_A sp900066165	ERS608499	ERP008729	Austria	ftp://ftp.ebi.ac.uk/pub/databases/metagenomics/mgnify_genomes/human-gut/v1.0/all_genomes/MGYG-HGUT-000/MGYG-HGUT-00002/genomes1/GUT_GENOME064285.gff.gz	2
GUT_GENOME278684_01506	GUT_GENOME278684_01506	KEF28001.1	O-deglycosylation	1	780	1	780	780	98.59	0	1577	100	1989908	175	21464	59.85	98.91	1.21	GUT_GENOME142522	d__Bacteria;p__Actinobacteriota;c__Actinobacteria;o__Actinomycetales;f__Bifidobacteriaceae;g__Bifidobacterium;s__Bifidobacterium adolescentis	ERS972357	ERP012929	Israel	ftp://ftp.ebi.ac.uk/pub/databases/metagenomics/mgnify_genomes/human-gut/v1.0/all_genomes/MGYG-HGUT-023/MGYG-HGUT-02395/genomes2/GUT_GENOME278684.gff.gz	1
GUT_GENOME197249_00250	GUT_GENOME197249_00250	KEF28010.1	O-deglycosylation	1	748	1	748	748	98.529	0	1523	100	1157015	282	4478	59.77	60.53	1.75	GUT_GENOME142522	d__Bacteria;p__Actinobacteriota;c__Actinobacteria;o__Actinomycetales;f__Bifidobacteriaceae;g__Bifidobacterium;s__Bifidobacterium adolescentis	SRS1876536	SRP095580	Netherlands	ftp://ftp.ebi.ac.uk/pub/databases/metagenomics/mgnify_genomes/human-gut/v1.0/all_genomes/MGYG-HGUT-023/MGYG-HGUT-02395/genomes4/GUT_GENOME197249.gff.gz	1
GUT_GENOME091074_00151	GUT_GENOME091074_00151	CCC80442.1	De-rhamnosylation	4	523	3	521	525	43.238	1.78e-151	452	99	2830533	88	73137	43.31	78.37	4.43	GUT_GENOME000004	d__Bacteria;p__Firmicutes_A;c__Clostridia;o__Lachnospirales;f__Lachnospiraceae;g__Blautia_A;s__Blautia_A sp900066165	ERS608511	ERP008729	Austria	ftp://ftp.ebi.ac.uk/pub/databases/metagenomics/mgnify_genomes/human-gut/v1.0/all_genomes/MGYG-HGUT-000/MGYG-HGUT-00002/genomes1/GUT_GENOME091074.gff.gz	1
GUT_GENOME218530_00801	GUT_GENOME218530_00801	KEF28010.1	O-deglycosylation	1	748	1	748	748	98.529	0	1523	100	2025962	361	7184	59.65	92.91	3.41	GUT_GENOME142522	d__Bacteria;p__Actinobacteriota;c__Actinobacteria;o__Actinomycetales;f__Bifidobacteriaceae;g__Bifidobacterium;s__Bifidobacterium adolescentis	SRS1170796	SRP066479	El Salvador	ftp://ftp.ebi.ac.uk/pub/databases/metagenomics/mgnify_genomes/human-gut/v1.0/all_genomes/MGYG-HGUT-023/MGYG-HGUT-02395/genomes3/GUT_GENOME218530.gff.gz	1
GUT_GENOME271511_00938	GUT_GENOME271511_00938	KEF28010.1	O-deglycosylation	1	748	1	748	748	98.529	0	1524	100	1643022	96	24902	59.61	79.9	4.25	GUT_GENOME142522	d__Bacteria;p__Actinobacteriota;c__Actinobacteria;o__Actinomycetales;f__Bifidobacteriaceae;g__Bifidobacterium;s__Bifidobacterium adolescentis	ERS971673	ERP012929	Israel	ftp://ftp.ebi.ac.uk/pub/databases/metagenomics/mgnify_genomes/human-gut/v1.0/all_genomes/MGYG-HGUT-023/MGYG-HGUT-02395/genomes2/GUT_GENOME271511.gff.gz	4
GUT_GENOME091084_00077	GUT_GENOME091084_00077	CCC80442.1	De-rhamnosylation	4	523	3	521	525	43.238	9.69e-152	453	99	4663529	250	33761	42.03	86.99	1.58	GUT_GENOME000004	d__Bacteria;p__Firmicutes_A;c__Clostridia;o__Lachnospirales;f__Lachnospiraceae;g__Blautia_A;s__Blautia_A sp900066165	ERS608563	ERP008729	Austria	ftp://ftp.ebi.ac.uk/pub/databases/metagenomics/mgnify_genomes/human-gut/v1.0/all_genomes/MGYG-HGUT-000/MGYG-HGUT-00002/genomes1/GUT_GENOME091084.gff.gz	1
GUT_GENOME103399_00891	GUT_GENOME103399_00891	KEF28010.1	O-deglycosylation	148	748	1	601	601	98.502	0	1220	80	1533560	412	4336	59.81	72.57	1.53	GUT_GENOME142522	d__Bacteria;p__Actinobacteriota;c__Actinobacteria;o__Actinomycetales;f__Bifidobacteriaceae;g__Bifidobacterium;s__Bifidobacterium adolescentis	ERS1491674	ERP020739	United Kingdom	ftp://ftp.ebi.ac.uk/pub/databases/metagenomics/mgnify_genomes/human-gut/v1.0/all_genomes/MGYG-HGUT-023/MGYG-HGUT-02395/genomes1/GUT_GENOME103399.gff.gz	1
GUT_GENOME075181_00295	GUT_GENOME075181_00295	KEF28010.1	O-deglycosylation	41	748	1	708	708	98.446	0	1442	95	1932187	365	8515	59.84	91.94	3.99	GUT_GENOME142522	d__Bacteria;p__Actinobacteriota;c__Actinobacteria;o__Actinomycetales;f__Bifidobacteriaceae;g__Bifidobacterium;s__Bifidobacterium adolescentis	ERS396528	ERP004605	Spain	ftp://ftp.ebi.ac.uk/pub/databases/metagenomics/mgnify_genomes/human-gut/v1.0/all_genomes/MGYG-HGUT-023/MGYG-HGUT-02395/genomes5/GUT_GENOME075181.gff.gz	1
GUT_GENOME091715_01302	GUT_GENOME000485_02835	ANI69962.1	O-demethylation	2	257	1	255	257	40.078	4.63e-56	203	94	4289261	69	129395	42.84	99.37	0	GUT_GENOME000004	d__Bacteria;p__Firmicutes_A;c__Clostridia;o__Lachnospirales;f__Lachnospiraceae;g__Blautia_A;s__Blautia_A sp900066165	ERS2046377	ERP105624	United Kingdom	ftp://ftp.ebi.ac.uk/pub/databases/metagenomics/mgnify_genomes/human-gut/v1.0/all_genomes/MGYG-HGUT-000/MGYG-HGUT-00002/genomes1/GUT_GENOME000485.gff.gz	4
GUT_GENOME266231_00643	GUT_GENOME266231_00643	KEF28001.1	O-deglycosylation	1	780	1	780	780	98.333	0	1577	100	1275636	88	25755	59.57	69.52	0.61	GUT_GENOME142522	d__Bacteria;p__Actinobacteriota;c__Actinobacteria;o__Actinomycetales;f__Bifidobacteriaceae;g__Bifidobacterium;s__Bifidobacterium adolescentis	ERS971651	ERP012929	Israel	ftp://ftp.ebi.ac.uk/pub/databases/metagenomics/mgnify_genomes/human-gut/v1.0/all_genomes/MGYG-HGUT-023/MGYG-HGUT-02395/genomes5/GUT_GENOME266231.gff.gz	1
GUT_GENOME038849_01459	GUT_GENOME038842_01100	KEF28010.1	O-deglycosylation	1	748	1	748	748	98.262	0	1521	100	1896149	128	25775	59.84	97.3	1.59	GUT_GENOME142522	d__Bacteria;p__Actinobacteriota;c__Actinobacteria;o__Actinomycetales;f__Bifidobacteriaceae;g__Bifidobacterium;s__Bifidobacterium adolescentis	ERS1066648	ERP013933	United States	ftp://ftp.ebi.ac.uk/pub/databases/metagenomics/mgnify_genomes/human-gut/v1.0/all_genomes/MGYG-HGUT-023/MGYG-HGUT-02395/genomes4/GUT_GENOME038842.gff.gz	3
GUT_GENOME092230_01082	GUT_GENOME088279_00891	KEF28010.1	O-deglycosylation	1	748	1	748	748	98.262	0	1521	100	2287441	52	114764	59.59	99.7	1.53	GUT_GENOME142522	d__Bacteria;p__Actinobacteriota;c__Actinobacteria;o__Actinomycetales;f__Bifidobacteriaceae;g__Bifidobacterium;s__Bifidobacterium adolescentis	ERS608530	ERP008729	Austria	ftp://ftp.ebi.ac.uk/pub/databases/metagenomics/mgnify_genomes/human-gut/v1.0/all_genomes/MGYG-HGUT-023/MGYG-HGUT-02395/genomes5/GUT_GENOME088279.gff.gz	5
GUT_GENOME091817_01583	GUT_GENOME091817_01583	ANI69961.1	O-demethylation	13	210	49	246	199	47.236	9.65e-52	187	94	2732547	424	8439	43.64	75.49	0.77	GUT_GENOME000004	d__Bacteria;p__Firmicutes_A;c__Clostridia;o__Lachnospirales;f__Lachnospiraceae;g__Blautia_A;s__Blautia_A sp900066165	ERS608477	ERP008729	Austria	ftp://ftp.ebi.ac.uk/pub/databases/metagenomics/mgnify_genomes/human-gut/v1.0/all_genomes/MGYG-HGUT-000/MGYG-HGUT-00002/genomes1/GUT_GENOME091817.gff.gz	1
GUT_GENOME092152_00140	GUT_GENOME092152_00140	ANI69962.1	O-demethylation	2	257	1	255	257	40.078	5.53e-56	203	94	2939312	236	21745	43.51	83.47	4.11	GUT_GENOME000004	d__Bacteria;p__Firmicutes_A;c__Clostridia;o__Lachnospirales;f__Lachnospiraceae;g__Blautia_A;s__Blautia_A sp900066165	ERS608579	ERP008729	Austria	ftp://ftp.ebi.ac.uk/pub/databases/metagenomics/mgnify_genomes/human-gut/v1.0/all_genomes/MGYG-HGUT-000/MGYG-HGUT-00002/genomes1/GUT_GENOME092152.gff.gz	1
GUT_GENOME182000_01105	GUT_GENOME026679_00816	KEF28010.1	O-deglycosylation	1	748	1	748	748	98.262	0	1521	100	1288216	39	51287	58.98	70	1.08	GUT_GENOME142522	d__Bacteria;p__Actinobacteriota;c__Actinobacteria;o__Actinomycetales;f__Bifidobacteriaceae;g__Bifidobacterium;s__Bifidobacterium adolescentis	ERS1444621	ERP019502	Kazakhstan	ftp://ftp.ebi.ac.uk/pub/databases/metagenomics/mgnify_genomes/human-gut/v1.0/all_genomes/MGYG-HGUT-023/MGYG-HGUT-02395/genomes2/GUT_GENOME026679.gff.gz	5
GUT_GENOME092152_00151	GUT_GENOME092152_00151	CCC80440.1	De-rhamnosylation	9	632	6	677	672	42.262	0	579	96	2939312	236	21745	43.51	83.47	4.11	GUT_GENOME000004	d__Bacteria;p__Firmicutes_A;c__Clostridia;o__Lachnospirales;f__Lachnospiraceae;g__Blautia_A;s__Blautia_A sp900066165	ERS608579	ERP008729	Austria	ftp://ftp.ebi.ac.uk/pub/databases/metagenomics/mgnify_genomes/human-gut/v1.0/all_genomes/MGYG-HGUT-000/MGYG-HGUT-00002/genomes1/GUT_GENOME092152.gff.gz	5
GUT_GENOME092152_00581	GUT_GENOME092152_00581	QBM20342.1	De-rhamnosylation	1	887	1	887	895	54.413	0	1010	99	2939312	236	21745	43.51	83.47	4.11	GUT_GENOME000004	d__Bacteria;p__Firmicutes_A;c__Clostridia;o__Lachnospirales;f__Lachnospiraceae;g__Blautia_A;s__Blautia_A sp900066165	ERS608579	ERP008729	Austria	ftp://ftp.ebi.ac.uk/pub/databases/metagenomics/mgnify_genomes/human-gut/v1.0/all_genomes/MGYG-HGUT-000/MGYG-HGUT-00002/genomes1/GUT_GENOME092152.gff.gz	1
GUT_GENOME160735_00684	GUT_GENOME160735_00684	KEF28010.1	O-deglycosylation	66	748	1	683	683	98.243	0	1387	91	1688652	205	12762	60.14	93.33	0.7	GUT_GENOME142522	d__Bacteria;p__Actinobacteriota;c__Actinobacteria;o__Actinomycetales;f__Bifidobacteriaceae;g__Bifidobacterium;s__Bifidobacterium adolescentis	SRS1876536	SRP095580	Netherlands	ftp://ftp.ebi.ac.uk/pub/databases/metagenomics/mgnify_genomes/human-gut/v1.0/all_genomes/MGYG-HGUT-023/MGYG-HGUT-02395/genomes2/GUT_GENOME160735.gff.gz	1
GUT_GENOME092152_01472	GUT_GENOME092152_01472	CCC80442.1	De-rhamnosylation	4	523	3	521	525	43.048	4.68e-151	452	99	2939312	236	21745	43.51	83.47	4.11	GUT_GENOME000004	d__Bacteria;p__Firmicutes_A;c__Clostridia;o__Lachnospirales;f__Lachnospiraceae;g__Blautia_A;s__Blautia_A sp900066165	ERS608579	ERP008729	Austria	ftp://ftp.ebi.ac.uk/pub/databases/metagenomics/mgnify_genomes/human-gut/v1.0/all_genomes/MGYG-HGUT-000/MGYG-HGUT-00002/genomes1/GUT_GENOME092152.gff.gz	1
GUT_GENOME025288_01161	GUT_GENOME025288_01161	KEF28010.1	O-deglycosylation	1	748	1	748	748	98.128	0	1516	100	1747629	128	22381	59.88	93.83	0.36	GUT_GENOME142522	d__Bacteria;p__Actinobacteriota;c__Actinobacteria;o__Actinomycetales;f__Bifidobacteriaceae;g__Bifidobacterium;s__Bifidobacterium adolescentis	ERS1444576	ERP019502	Kazakhstan	ftp://ftp.ebi.ac.uk/pub/databases/metagenomics/mgnify_genomes/human-gut/v1.0/all_genomes/MGYG-HGUT-023/MGYG-HGUT-02395/genomes5/GUT_GENOME025288.gff.gz	1
GUT_GENOME127821_00509	GUT_GENOME127821_00509	KEF28010.1	O-deglycosylation	1	748	1	748	748	98.128	0	1517	100	1496514	301	6162	60.53	79.62	2.45	GUT_GENOME142522	d__Bacteria;p__Actinobacteriota;c__Actinobacteria;o__Actinomycetales;f__Bifidobacteriaceae;g__Bifidobacterium;s__Bifidobacterium adolescentis	SRS1596801	SRP080787	Mongolia	ftp://ftp.ebi.ac.uk/pub/databases/metagenomics/mgnify_genomes/human-gut/v1.0/all_genomes/MGYG-HGUT-023/MGYG-HGUT-02395/genomes2/GUT_GENOME127821.gff.gz	1
GUT_GENOME092383_00882	GUT_GENOME092383_00882	CCC80442.1	De-rhamnosylation	4	523	3	521	525	43.238	7.97e-152	454	99	3476235	343	16015	43.21	90.29	1.69	GUT_GENOME000004	d__Bacteria;p__Firmicutes_A;c__Clostridia;o__Lachnospirales;f__Lachnospiraceae;g__Blautia_A;s__Blautia_A sp900066165	ERS608503	ERP008729	Austria	ftp://ftp.ebi.ac.uk/pub/databases/metagenomics/mgnify_genomes/human-gut/v1.0/all_genomes/MGYG-HGUT-000/MGYG-HGUT-00002/genomes1/GUT_GENOME092383.gff.gz	1
GUT_GENOME092383_01743	GUT_GENOME092383_01743	QBM20342.1	De-rhamnosylation	1	887	1	887	895	54.972	0	1018	99	3476235	343	16015	43.21	90.29	1.69	GUT_GENOME000004	d__Bacteria;p__Firmicutes_A;c__Clostridia;o__Lachnospirales;f__Lachnospiraceae;g__Blautia_A;s__Blautia_A sp900066165	ERS608503	ERP008729	Austria	ftp://ftp.ebi.ac.uk/pub/databases/metagenomics/mgnify_genomes/human-gut/v1.0/all_genomes/MGYG-HGUT-000/MGYG-HGUT-00002/genomes1/GUT_GENOME092383.gff.gz	1
GUT_GENOME131892_01234	GUT_GENOME131862_01422	KEF28010.1	O-deglycosylation	1	748	1	748	748	98.128	0	1518	100	1913585	99	34257	59.69	99.55	0.45	GUT_GENOME142522	d__Bacteria;p__Actinobacteriota;c__Actinobacteria;o__Actinomycetales;f__Bifidobacteriaceae;g__Bifidobacterium;s__Bifidobacterium adolescentis	NA	NA	Germany	ftp://ftp.ebi.ac.uk/pub/databases/metagenomics/mgnify_genomes/human-gut/v1.0/all_genomes/MGYG-HGUT-023/MGYG-HGUT-02395/genomes4/GUT_GENOME131862.gff.gz	4
GUT_GENOME092498_00754	GUT_GENOME092498_00754	CCC80442.1	De-rhamnosylation	4	523	3	521	525	43.238	1.78e-151	452	99	2069889	298	9130	43.96	65.25	2.53	GUT_GENOME000004	d__Bacteria;p__Firmicutes_A;c__Clostridia;o__Lachnospirales;f__Lachnospiraceae;g__Blautia_A;s__Blautia_A sp900066165	ERS608577	ERP008729	Austria	ftp://ftp.ebi.ac.uk/pub/databases/metagenomics/mgnify_genomes/human-gut/v1.0/all_genomes/MGYG-HGUT-000/MGYG-HGUT-00002/genomes1/GUT_GENOME092498.gff.gz	1
GUT_GENOME175999_01557	GUT_GENOME175999_01557	KEF28010.1	O-deglycosylation	1	748	1	748	748	98.128	0	1518	100	1957298	44	82042	59.7	93.23	0.2	GUT_GENOME142522	d__Bacteria;p__Actinobacteriota;c__Actinobacteria;o__Actinomycetales;f__Bifidobacteriaceae;g__Bifidobacterium;s__Bifidobacterium adolescentis	SRS1205290	SRP067325	United States	ftp://ftp.ebi.ac.uk/pub/databases/metagenomics/mgnify_genomes/human-gut/v1.0/all_genomes/MGYG-HGUT-023/MGYG-HGUT-02395/genomes2/GUT_GENOME175999.gff.gz	1
GUT_GENOME260396_00859	GUT_GENOME260396_00859	KEF28010.1	O-deglycosylation	1	748	1	748	748	98.128	0	1519	100	2041252	42	66767	59.26	97.63	0.3	GUT_GENOME142522	d__Bacteria;p__Actinobacteriota;c__Actinobacteria;o__Actinomycetales;f__Bifidobacteriaceae;g__Bifidobacterium;s__Bifidobacterium adolescentis	ERS746923	ERP010700	United Kingdom	ftp://ftp.ebi.ac.uk/pub/databases/metagenomics/mgnify_genomes/human-gut/v1.0/all_genomes/MGYG-HGUT-023/MGYG-HGUT-02395/genomes4/GUT_GENOME260396.gff.gz	1
GUT_GENOME271335_00680	GUT_GENOME271335_00680	KEF28010.1	O-deglycosylation	1	748	1	748	748	98.128	0	1517	100	1626193	131	21349	60.07	91.6	1.45	GUT_GENOME142522	d__Bacteria;p__Actinobacteriota;c__Actinobacteria;o__Actinomycetales;f__Bifidobacteriaceae;g__Bifidobacterium;s__Bifidobacterium adolescentis	ERS971990	ERP012929	Israel	ftp://ftp.ebi.ac.uk/pub/databases/metagenomics/mgnify_genomes/human-gut/v1.0/all_genomes/MGYG-HGUT-023/MGYG-HGUT-02395/genomes1/GUT_GENOME271335.gff.gz	1
GUT_GENOME092625_00430	GUT_GENOME027551_01723	CCC80442.1	De-rhamnosylation	4	523	3	521	525	42.857	2.19e-149	447	99	3214213	92	61651	43.52	84.18	3.16	GUT_GENOME000004	d__Bacteria;p__Firmicutes_A;c__Clostridia;o__Lachnospirales;f__Lachnospiraceae;g__Blautia_A;s__Blautia_A sp900066165	DRS026580	DRP003048	Japan	ftp://ftp.ebi.ac.uk/pub/databases/metagenomics/mgnify_genomes/human-gut/v1.0/all_genomes/MGYG-HGUT-000/MGYG-HGUT-00002/genomes1/GUT_GENOME027551.gff.gz	18
GUT_GENOME092625_01648	GUT_GENOME092625_01648	BBG22493.1	C-deglyc (PUE)	1	367	1	357	367	51.771	1.14e-130	387	100	2106801	333	8852	44.37	63.13	2.43	GUT_GENOME000004	d__Bacteria;p__Firmicutes_A;c__Clostridia;o__Lachnospirales;f__Lachnospiraceae;g__Blautia_A;s__Blautia_A sp900066165	ERS608611	ERP008729	Austria	ftp://ftp.ebi.ac.uk/pub/databases/metagenomics/mgnify_genomes/human-gut/v1.0/all_genomes/MGYG-HGUT-000/MGYG-HGUT-00002/genomes1/GUT_GENOME092625.gff.gz	1
GUT_GENOME024594_01184	GUT_GENOME023406_00786	KEF28010.1	O-deglycosylation	1	748	1	748	748	97.995	0	1514	100	1868660	112	23560	59.77	96.66	0.23	GUT_GENOME142522	d__Bacteria;p__Actinobacteriota;c__Actinobacteria;o__Actinomycetales;f__Bifidobacteriaceae;g__Bifidobacterium;s__Bifidobacterium adolescentis	ERS1444512	ERP019502	Kazakhstan	ftp://ftp.ebi.ac.uk/pub/databases/metagenomics/mgnify_genomes/human-gut/v1.0/all_genomes/MGYG-HGUT-023/MGYG-HGUT-02395/genomes5/GUT_GENOME023406.gff.gz	12
GUT_GENOME093089_00091	GUT_GENOME093089_00091	CCC80442.1	De-rhamnosylation	4	523	3	521	525	43.048	2.81e-150	449	99	2877852	109	49829	43.41	88.89	0.32	GUT_GENOME000004	d__Bacteria;p__Firmicutes_A;c__Clostridia;o__Lachnospirales;f__Lachnospiraceae;g__Blautia_A;s__Blautia_A sp900066165	ERS608561	ERP008729	Austria	ftp://ftp.ebi.ac.uk/pub/databases/metagenomics/mgnify_genomes/human-gut/v1.0/all_genomes/MGYG-HGUT-000/MGYG-HGUT-00002/genomes1/GUT_GENOME093089.gff.gz	1
GUT_GENOME093299_00633	GUT_GENOME093299_00633	CCC80442.1	De-rhamnosylation	4	523	3	521	525	43.238	7.97e-152	454	99	3588978	160	44279	43.22	97.75	1.27	GUT_GENOME000004	d__Bacteria;p__Firmicutes_A;c__Clostridia;o__Lachnospirales;f__Lachnospiraceae;g__Blautia_A;s__Blautia_A sp900066165	ERS608529	ERP008729	Austria	ftp://ftp.ebi.ac.uk/pub/databases/metagenomics/mgnify_genomes/human-gut/v1.0/all_genomes/MGYG-HGUT-000/MGYG-HGUT-00002/genomes1/GUT_GENOME093299.gff.gz	1
GUT_GENOME095898_00819	GUT_GENOME095898_00819	KEF28010.1	O-deglycosylation	1	748	1	748	748	97.995	0	1515	100	2006886	76	42079	59.4	94.24	0.55	GUT_GENOME142522	d__Bacteria;p__Actinobacteriota;c__Actinobacteria;o__Actinomycetales;f__Bifidobacteriaceae;g__Bifidobacterium;s__Bifidobacterium adolescentis	NA	NA	Italy	ftp://ftp.ebi.ac.uk/pub/databases/metagenomics/mgnify_genomes/human-gut/v1.0/all_genomes/MGYG-HGUT-023/MGYG-HGUT-02395/genomes5/GUT_GENOME095898.gff.gz	1
GUT_GENOME129036_00870	GUT_GENOME129036_00870	KEF28010.1	O-deglycosylation	1	748	1	748	748	97.995	0	1515	100	1823428	99	29042	60.15	92.78	0.89	GUT_GENOME142522	d__Bacteria;p__Actinobacteriota;c__Actinobacteria;o__Actinomycetales;f__Bifidobacteriaceae;g__Bifidobacterium;s__Bifidobacterium adolescentis	SRS1596850	SRP080787	Mongolia	ftp://ftp.ebi.ac.uk/pub/databases/metagenomics/mgnify_genomes/human-gut/v1.0/all_genomes/MGYG-HGUT-023/MGYG-HGUT-02395/genomes1/GUT_GENOME129036.gff.gz	1
GUT_GENOME093554_00531	GUT_GENOME093554_00531	CCC80442.1	De-rhamnosylation	4	523	3	521	525	42.857	1.08e-149	448	99	2938571	493	7592	43.41	81.07	4.85	GUT_GENOME000004	d__Bacteria;p__Firmicutes_A;c__Clostridia;o__Lachnospirales;f__Lachnospiraceae;g__Blautia_A;s__Blautia_A sp900066165	ERS608517	ERP008729	Austria	ftp://ftp.ebi.ac.uk/pub/databases/metagenomics/mgnify_genomes/human-gut/v1.0/all_genomes/MGYG-HGUT-000/MGYG-HGUT-00002/genomes1/GUT_GENOME093554.gff.gz	1
GUT_GENOME272010_00778	GUT_GENOME272010_00778	KEF28010.1	O-deglycosylation	1	748	1	748	748	97.995	0	1514	100	1570079	78	32848	59.59	80.22	2	GUT_GENOME142522	d__Bacteria;p__Actinobacteriota;c__Actinobacteria;o__Actinomycetales;f__Bifidobacteriaceae;g__Bifidobacterium;s__Bifidobacterium adolescentis	ERS972022	ERP012929	Israel	ftp://ftp.ebi.ac.uk/pub/databases/metagenomics/mgnify_genomes/human-gut/v1.0/all_genomes/MGYG-HGUT-023/MGYG-HGUT-02395/genomes5/GUT_GENOME272010.gff.gz	1
GUT_GENOME055355_01082	GUT_GENOME055355_01082	KEF28010.1	O-deglycosylation	41	748	1	708	708	97.881	0	1433	95	1513596	272	6751	59.52	76.08	1.34	GUT_GENOME142522	d__Bacteria;p__Actinobacteriota;c__Actinobacteria;o__Actinomycetales;f__Bifidobacteriaceae;g__Bifidobacterium;s__Bifidobacterium adolescentis	ERS396299	ERP004605	Denmark	ftp://ftp.ebi.ac.uk/pub/databases/metagenomics/mgnify_genomes/human-gut/v1.0/all_genomes/MGYG-HGUT-023/MGYG-HGUT-02395/genomes3/GUT_GENOME055355.gff.gz	2
GUT_GENOME093860_01010	GUT_GENOME093860_01010	CCC80442.1	De-rhamnosylation	60	523	17	481	469	46.055	1.05e-146	439	88	2830878	331	11821	43.67	87.05	2.34	GUT_GENOME000004	d__Bacteria;p__Firmicutes_A;c__Clostridia;o__Lachnospirales;f__Lachnospiraceae;g__Blautia_A;s__Blautia_A sp900066165	ERS608494	ERP008729	Austria	ftp://ftp.ebi.ac.uk/pub/databases/metagenomics/mgnify_genomes/human-gut/v1.0/all_genomes/MGYG-HGUT-000/MGYG-HGUT-00002/genomes1/GUT_GENOME093860.gff.gz	1
GUT_GENOME000861_00990	GUT_GENOME000861_00990	KEF28010.1	O-deglycosylation	1	748	1	748	748	97.861	0	1513	100	2197119	17	512201	59.45	100	0.15	GUT_GENOME142522	d__Bacteria;p__Actinobacteriota;c__Actinobacteria;o__Actinomycetales;f__Bifidobacteriaceae;g__Bifidobacterium;s__Bifidobacterium adolescentis	SAMN09734284	PRJNA482748	China	ftp://ftp.ebi.ac.uk/pub/databases/metagenomics/mgnify_genomes/human-gut/v1.0/all_genomes/MGYG-HGUT-023/MGYG-HGUT-02395/genomes3/GUT_GENOME000861.gff.gz	1
GUT_GENOME026943_00926	GUT_GENOME026943_00926	KEF28010.1	O-deglycosylation	1	748	1	748	748	97.861	0	1511	100	1435659	10	820584	59.46	69.38	0	GUT_GENOME142522	d__Bacteria;p__Actinobacteriota;c__Actinobacteria;o__Actinomycetales;f__Bifidobacteriaceae;g__Bifidobacterium;s__Bifidobacterium adolescentis	ERS1444628	ERP019502	Kazakhstan	ftp://ftp.ebi.ac.uk/pub/databases/metagenomics/mgnify_genomes/human-gut/v1.0/all_genomes/MGYG-HGUT-023/MGYG-HGUT-02395/genomes4/GUT_GENOME026943.gff.gz	1
GUT_GENOME094001_01386	GUT_GENOME061100_00662	ANI69962.1	O-demethylation	2	257	1	255	257	40.078	1.06e-55	202	94	3272381	142	39304	43.27	88.35	1.27	GUT_GENOME000004	d__Bacteria;p__Firmicutes_A;c__Clostridia;o__Lachnospirales;f__Lachnospiraceae;g__Blautia_A;s__Blautia_A sp900066165	ERS473258	ERP005989	Denmark	ftp://ftp.ebi.ac.uk/pub/databases/metagenomics/mgnify_genomes/human-gut/v1.0/all_genomes/MGYG-HGUT-000/MGYG-HGUT-00002/genomes1/GUT_GENOME061100.gff.gz	17
GUT_GENOME088413_01338	GUT_GENOME088413_01338	KEF28010.1	O-deglycosylation	1	748	1	748	748	97.861	0	1511	100	2123825	62	72741	59.62	98.07	0.15	GUT_GENOME142522	d__Bacteria;p__Actinobacteriota;c__Actinobacteria;o__Actinomycetales;f__Bifidobacteriaceae;g__Bifidobacterium;s__Bifidobacterium adolescentis	ERS608537	ERP008729	Austria	ftp://ftp.ebi.ac.uk/pub/databases/metagenomics/mgnify_genomes/human-gut/v1.0/all_genomes/MGYG-HGUT-023/MGYG-HGUT-02395/genomes2/GUT_GENOME088413.gff.gz	2
GUT_GENOME094001_02609	GUT_GENOME067835_00030	QBM20342.1	De-rhamnosylation	1	887	1	887	895	54.749	0	1018	99	2712193	699	5347	43.36	75.34	1.83	GUT_GENOME000004	d__Bacteria;p__Firmicutes_A;c__Clostridia;o__Lachnospirales;f__Lachnospiraceae;g__Blautia_A;s__Blautia_A sp900066165	ERS235582	ERP002469	Sweden	ftp://ftp.ebi.ac.uk/pub/databases/metagenomics/mgnify_genomes/human-gut/v1.0/all_genomes/MGYG-HGUT-000/MGYG-HGUT-00002/genomes1/GUT_GENOME067835.gff.gz	3
GUT_GENOME094091_00881	GUT_GENOME094091_00881	CCC80442.1	De-rhamnosylation	4	523	3	521	525	43.238	7.55e-151	451	99	3035236	343	12634	43.12	77.88	1.9	GUT_GENOME000004	d__Bacteria;p__Firmicutes_A;c__Clostridia;o__Lachnospirales;f__Lachnospiraceae;g__Blautia_A;s__Blautia_A sp900066165	ERS608510	ERP008729	Austria	ftp://ftp.ebi.ac.uk/pub/databases/metagenomics/mgnify_genomes/human-gut/v1.0/all_genomes/MGYG-HGUT-000/MGYG-HGUT-00002/genomes1/GUT_GENOME094091.gff.gz	5
GUT_GENOME097663_01518	GUT_GENOME097663_01518	KEF28010.1	O-deglycosylation	1	748	1	748	748	97.861	0	1512	100	2015109	86	38395	59.31	98.3	0.72	GUT_GENOME142522	d__Bacteria;p__Actinobacteriota;c__Actinobacteria;o__Actinomycetales;f__Bifidobacteriaceae;g__Bifidobacterium;s__Bifidobacterium adolescentis	SRS2267601	SRP108915	Canada	ftp://ftp.ebi.ac.uk/pub/databases/metagenomics/mgnify_genomes/human-gut/v1.0/all_genomes/MGYG-HGUT-023/MGYG-HGUT-02395/genomes1/GUT_GENOME097663.gff.gz	1
GUT_GENOME094664_01843	GUT_GENOME094664_01843	CCC80442.1	De-rhamnosylation	4	523	3	521	525	42.857	5.63e-150	449	99	2949277	602	6155	43.31	80.25	4.96	GUT_GENOME000004	d__Bacteria;p__Firmicutes_A;c__Clostridia;o__Lachnospirales;f__Lachnospiraceae;g__Blautia_A;s__Blautia_A sp900066165	ERS608595	ERP008729	Austria	ftp://ftp.ebi.ac.uk/pub/databases/metagenomics/mgnify_genomes/human-gut/v1.0/all_genomes/MGYG-HGUT-000/MGYG-HGUT-00002/genomes1/GUT_GENOME094664.gff.gz	1
GUT_GENOME094664_02131	GUT_GENOME065519_02316	CCC80442.1	De-rhamnosylation	69	524	1	457	460	42.826	5.99e-134	406	87	2973626	412	9138	43.52	63.51	1.75	GUT_GENOME000004	d__Bacteria;p__Firmicutes_A;c__Clostridia;o__Lachnospirales;f__Lachnospiraceae;g__Blautia_A;s__Blautia_A sp900066165	ERS608595	ERP008729	Austria	ftp://ftp.ebi.ac.uk/pub/databases/metagenomics/mgnify_genomes/human-gut/v1.0/all_genomes/MGYG-HGUT-000/MGYG-HGUT-00002/genomes1/GUT_GENOME065519.gff.gz	2
GUT_GENOME096398_02686	GUT_GENOME190793_00146	BBG22493.1	C-deglyc (PUE)	15	367	14	360	353	56.657	6.6e-145	423	96	2899893	202	22919	43.74	88.39	4.59	GUT_GENOME000004	d__Bacteria;p__Firmicutes_A;c__Clostridia;o__Lachnospirales;f__Lachnospiraceae;g__Blautia_A;s__Blautia_A sp900066165	SRS1820232	SRP093965	United States	ftp://ftp.ebi.ac.uk/pub/databases/metagenomics/mgnify_genomes/human-gut/v1.0/all_genomes/MGYG-HGUT-000/MGYG-HGUT-00002/genomes1/GUT_GENOME190793.gff.gz	1
GUT_GENOME096856_00587	GUT_GENOME094001_01708	BBG22494.1	C-deglyc (PUE)	1	142	1	143	143	58.042	1.28e-55	179	100	3784612	314	18767	43.03	92.59	3.59	GUT_GENOME000004	d__Bacteria;p__Firmicutes_A;c__Clostridia;o__Lachnospirales;f__Lachnospiraceae;g__Blautia_A;s__Blautia_A sp900066165	ERS608537	ERP008729	Austria	ftp://ftp.ebi.ac.uk/pub/databases/metagenomics/mgnify_genomes/human-gut/v1.0/all_genomes/MGYG-HGUT-000/MGYG-HGUT-00002/genomes1/GUT_GENOME094001.gff.gz	1
GUT_GENOME128122_00501	GUT_GENOME128122_00501	KEF28010.1	O-deglycosylation	1	748	1	748	748	97.861	0	1514	100	1759081	197	14388	60.15	96.86	0.66	GUT_GENOME142522	d__Bacteria;p__Actinobacteriota;c__Actinobacteria;o__Actinomycetales;f__Bifidobacteriaceae;g__Bifidobacterium;s__Bifidobacterium adolescentis	SRS1596813	SRP080787	Mongolia	ftp://ftp.ebi.ac.uk/pub/databases/metagenomics/mgnify_genomes/human-gut/v1.0/all_genomes/MGYG-HGUT-023/MGYG-HGUT-02395/genomes5/GUT_GENOME128122.gff.gz	1
GUT_GENOME097477_00486	GUT_GENOME097477_00486	CCC80442.1	De-rhamnosylation	69	524	35	491	460	43.043	4.12e-134	407	87	2783539	884	3361	43.79	78.36	3.6	GUT_GENOME000004	d__Bacteria;p__Firmicutes_A;c__Clostridia;o__Lachnospirales;f__Lachnospiraceae;g__Blautia_A;s__Blautia_A sp900066165	SRS2267621	SRP108915	United States	ftp://ftp.ebi.ac.uk/pub/databases/metagenomics/mgnify_genomes/human-gut/v1.0/all_genomes/MGYG-HGUT-000/MGYG-HGUT-00002/genomes1/GUT_GENOME097477.gff.gz	1
GUT_GENOME131094_01721	GUT_GENOME131094_01721	KEF28010.1	O-deglycosylation	1	748	1	748	748	97.861	0	1513	100	2176621	57	61546	59.66	99.09	0.53	GUT_GENOME142522	d__Bacteria;p__Actinobacteriota;c__Actinobacteria;o__Actinomycetales;f__Bifidobacteriaceae;g__Bifidobacterium;s__Bifidobacterium adolescentis	SRS1993526	SRP100446	United States	ftp://ftp.ebi.ac.uk/pub/databases/metagenomics/mgnify_genomes/human-gut/v1.0/all_genomes/MGYG-HGUT-023/MGYG-HGUT-02395/genomes2/GUT_GENOME131094.gff.gz	1
GUT_GENOME208486_01022	GUT_GENOME068888_00629	KEF28010.1	O-deglycosylation	1	748	1	748	748	97.861	0	1512	100	1492346	273	6076	59.58	72.81	4.56	GUT_GENOME142522	d__Bacteria;p__Actinobacteriota;c__Actinobacteria;o__Actinomycetales;f__Bifidobacteriaceae;g__Bifidobacterium;s__Bifidobacterium adolescentis	ERS396297	ERP004605	Denmark	ftp://ftp.ebi.ac.uk/pub/databases/metagenomics/mgnify_genomes/human-gut/v1.0/all_genomes/MGYG-HGUT-023/MGYG-HGUT-02395/genomes3/GUT_GENOME068888.gff.gz	3
GUT_GENOME097481_00882	GUT_GENOME097481_00882	CCC80442.1	De-rhamnosylation	4	523	3	521	525	43.238	7.07e-151	451	99	3383203	944	3999	43.65	78.91	1.9	GUT_GENOME000004	d__Bacteria;p__Firmicutes_A;c__Clostridia;o__Lachnospirales;f__Lachnospiraceae;g__Blautia_A;s__Blautia_A sp900066165	SRS2267616	SRP108915	United States	ftp://ftp.ebi.ac.uk/pub/databases/metagenomics/mgnify_genomes/human-gut/v1.0/all_genomes/MGYG-HGUT-000/MGYG-HGUT-00002/genomes1/GUT_GENOME097481.gff.gz	1
GUT_GENOME222432_00659	GUT_GENOME222432_00659	KEF28010.1	O-deglycosylation	1	748	1	748	748	97.861	0	1512	100	2001270	153	18465	59.85	95.7	2.2	GUT_GENOME142522	d__Bacteria;p__Actinobacteriota;c__Actinobacteria;o__Actinomycetales;f__Bifidobacteriaceae;g__Bifidobacterium;s__Bifidobacterium adolescentis	SRS1596870	SRP080787	China	ftp://ftp.ebi.ac.uk/pub/databases/metagenomics/mgnify_genomes/human-gut/v1.0/all_genomes/MGYG-HGUT-023/MGYG-HGUT-02395/genomes1/GUT_GENOME222432.gff.gz	1
GUT_GENOME240810_01008	GUT_GENOME240810_01008	KEF28010.1	O-deglycosylation	1	748	1	748	748	97.861	0	1513	100	2071384	168	17979	59.44	98.51	2.27	GUT_GENOME142522	d__Bacteria;p__Actinobacteriota;c__Actinobacteria;o__Actinomycetales;f__Bifidobacteriaceae;g__Bifidobacterium;s__Bifidobacterium adolescentis	SRS1719313	SRP090628	Russia	ftp://ftp.ebi.ac.uk/pub/databases/metagenomics/mgnify_genomes/human-gut/v1.0/all_genomes/MGYG-HGUT-023/MGYG-HGUT-02395/genomes1/GUT_GENOME240810.gff.gz	1
GUT_GENOME097625_01850	GUT_GENOME097625_01850	ANI69962.1	O-demethylation	2	257	1	255	257	40.078	5.48e-56	203	94	3158104	771	4868	43.55	82.29	0.84	GUT_GENOME000004	d__Bacteria;p__Firmicutes_A;c__Clostridia;o__Lachnospirales;f__Lachnospiraceae;g__Blautia_A;s__Blautia_A sp900066165	SRS2267561	SRP108915	Canada	ftp://ftp.ebi.ac.uk/pub/databases/metagenomics/mgnify_genomes/human-gut/v1.0/all_genomes/MGYG-HGUT-000/MGYG-HGUT-00002/genomes1/GUT_GENOME097625.gff.gz	1
GUT_GENOME099196_01732	GUT_GENOME099196_01732	ANI69962.1	O-demethylation	2	257	1	255	257	40.078	5.16e-56	203	94	3417717	179	37008	43.42	94.03	0.06	GUT_GENOME000004	d__Bacteria;p__Firmicutes_A;c__Clostridia;o__Lachnospirales;f__Lachnospiraceae;g__Blautia_A;s__Blautia_A sp900066165	ERS1343397	ERP017091	China	ftp://ftp.ebi.ac.uk/pub/databases/metagenomics/mgnify_genomes/human-gut/v1.0/all_genomes/MGYG-HGUT-000/MGYG-HGUT-00002/genomes1/GUT_GENOME099196.gff.gz	1
GUT_GENOME100759_01038	GUT_GENOME130119_01328	BBG22493.1	C-deglyc (PUE)	1	367	1	357	367	51.771	2.92e-131	389	100	2732210	355	10608	44.01	85.44	2.53	GUT_GENOME000004	d__Bacteria;p__Firmicutes_A;c__Clostridia;o__Lachnospirales;f__Lachnospiraceae;g__Blautia_A;s__Blautia_A sp900066165	SRS1994020	SRP100446	United States	ftp://ftp.ebi.ac.uk/pub/databases/metagenomics/mgnify_genomes/human-gut/v1.0/all_genomes/MGYG-HGUT-000/MGYG-HGUT-00002/genomes1/GUT_GENOME130119.gff.gz	1
GUT_GENOME268247_01265	GUT_GENOME268247_01265	KEF28010.1	O-deglycosylation	1	748	1	748	748	97.861	0	1514	100	1805401	195	15322	59.99	97.83	2.42	GUT_GENOME142522	d__Bacteria;p__Actinobacteriota;c__Actinobacteria;o__Actinomycetales;f__Bifidobacteriaceae;g__Bifidobacterium;s__Bifidobacterium adolescentis	ERS971857	ERP012929	Israel	ftp://ftp.ebi.ac.uk/pub/databases/metagenomics/mgnify_genomes/human-gut/v1.0/all_genomes/MGYG-HGUT-023/MGYG-HGUT-02395/genomes5/GUT_GENOME268247.gff.gz	1
GUT_GENOME101499_01761	GUT_GENOME004166_00616	CCC80442.1	De-rhamnosylation	1	524	1	524	525	60.381	0	684	99	1920814	568	3673	44.26	57.95	0.63	GUT_GENOME000004	d__Bacteria;p__Firmicutes_A;c__Clostridia;o__Lachnospirales;f__Lachnospiraceae;g__Blautia_A;s__Blautia_A sp900066165	ERS473186	ERP005989	Sweden	ftp://ftp.ebi.ac.uk/pub/databases/metagenomics/mgnify_genomes/human-gut/v1.0/all_genomes/MGYG-HGUT-000/MGYG-HGUT-00002/genomes1/GUT_GENOME004166.gff.gz	1
GUT_GENOME103681_00993	GUT_GENOME239635_01935	AAV43293.1	De-rhamnosylation	2	730	3	739	749	41.389	2.42e-177	541	78	2582159	467	8927	44.33	79.06	4.22	GUT_GENOME000004	d__Bacteria;p__Firmicutes_A;c__Clostridia;o__Lachnospirales;f__Lachnospiraceae;g__Blautia_A;s__Blautia_A sp900066165	SRS883113	SRP056480	Italy	ftp://ftp.ebi.ac.uk/pub/databases/metagenomics/mgnify_genomes/human-gut/v1.0/all_genomes/MGYG-HGUT-000/MGYG-HGUT-00002/genomes1/GUT_GENOME239635.gff.gz	1
GUT_GENOME279855_00711	GUT_GENOME267936_01002	KEF28010.1	O-deglycosylation	1	748	1	748	748	97.861	0	1513	100	1814613	190	17181	60.03	97.3	1.44	GUT_GENOME142522	d__Bacteria;p__Actinobacteriota;c__Actinobacteria;o__Actinomycetales;f__Bifidobacteriaceae;g__Bifidobacterium;s__Bifidobacterium adolescentis	ERS971846	ERP012929	Israel	ftp://ftp.ebi.ac.uk/pub/databases/metagenomics/mgnify_genomes/human-gut/v1.0/all_genomes/MGYG-HGUT-023/MGYG-HGUT-02395/genomes2/GUT_GENOME267936.gff.gz	3
GUT_GENOME104473_00827	GUT_GENOME104473_00827	CCC80442.1	De-rhamnosylation	4	523	3	521	525	43.238	7.97e-152	454	99	2985269	255	19119	43.52	80.75	0.63	GUT_GENOME000004	d__Bacteria;p__Firmicutes_A;c__Clostridia;o__Lachnospirales;f__Lachnospiraceae;g__Blautia_A;s__Blautia_A sp900066165	ERS235604	ERP002469	Sweden	ftp://ftp.ebi.ac.uk/pub/databases/metagenomics/mgnify_genomes/human-gut/v1.0/all_genomes/MGYG-HGUT-000/MGYG-HGUT-00002/genomes1/GUT_GENOME104473.gff.gz	1
GUT_GENOME281687_01512	GUT_GENOME281687_01512	KEF28010.1	O-deglycosylation	1	748	1	748	748	97.861	0	1512	100	1969819	114	31723	59.62	99.05	1.33	GUT_GENOME142522	d__Bacteria;p__Actinobacteriota;c__Actinobacteria;o__Actinomycetales;f__Bifidobacteriaceae;g__Bifidobacterium;s__Bifidobacterium adolescentis	ERS953898	ERP012929	Israel	ftp://ftp.ebi.ac.uk/pub/databases/metagenomics/mgnify_genomes/human-gut/v1.0/all_genomes/MGYG-HGUT-023/MGYG-HGUT-02395/genomes2/GUT_GENOME281687.gff.gz	1
GUT_GENOME104765_00039	GUT_GENOME104765_00039	CCC80442.1	De-rhamnosylation	4	523	3	521	525	42.857	4.68e-149	446	99	2756582	554	6253	43.53	78.66	4.75	GUT_GENOME000004	d__Bacteria;p__Firmicutes_A;c__Clostridia;o__Lachnospirales;f__Lachnospiraceae;g__Blautia_A;s__Blautia_A sp900066165	ERS235504	ERP002469	Sweden	ftp://ftp.ebi.ac.uk/pub/databases/metagenomics/mgnify_genomes/human-gut/v1.0/all_genomes/MGYG-HGUT-000/MGYG-HGUT-00002/genomes1/GUT_GENOME104765.gff.gz	1
GUT_GENOME128635_00794	GUT_GENOME128635_00794	KEF28010.1	O-deglycosylation	41	748	1	708	708	97.74	0	1431	95	1173866	350	3605	61.23	60.29	1.57	GUT_GENOME142522	d__Bacteria;p__Actinobacteriota;c__Actinobacteria;o__Actinomycetales;f__Bifidobacteriaceae;g__Bifidobacterium;s__Bifidobacterium adolescentis	SRS1596831	SRP080787	Mongolia	ftp://ftp.ebi.ac.uk/pub/databases/metagenomics/mgnify_genomes/human-gut/v1.0/all_genomes/MGYG-HGUT-023/MGYG-HGUT-02395/genomes5/GUT_GENOME128635.gff.gz	2
GUT_GENOME240880_01660	GUT_GENOME182622_01723	KEF28001.1	O-deglycosylation	31	780	1	750	750	97.733	0	1506	96	2141353	96	35663	59.61	96.63	5	GUT_GENOME142522	d__Bacteria;p__Actinobacteriota;c__Actinobacteria;o__Actinomycetales;f__Bifidobacteriaceae;g__Bifidobacterium;s__Bifidobacterium adolescentis	SRS1719350	SRP090628	Russia	ftp://ftp.ebi.ac.uk/pub/databases/metagenomics/mgnify_genomes/human-gut/v1.0/all_genomes/MGYG-HGUT-023/MGYG-HGUT-02395/genomes3/GUT_GENOME182622.gff.gz	2
GUT_GENOME005338_01378	GUT_GENOME005338_01378	KEF28010.1	O-deglycosylation	1	748	1	748	748	97.727	0	1511	100	1875727	119	24135	59.7	92.62	4.02	GUT_GENOME142522	d__Bacteria;p__Actinobacteriota;c__Actinobacteria;o__Actinomycetales;f__Bifidobacteriaceae;g__Bifidobacterium;s__Bifidobacterium adolescentis	ERS473270	ERP005989	Sweden	ftp://ftp.ebi.ac.uk/pub/databases/metagenomics/mgnify_genomes/human-gut/v1.0/all_genomes/MGYG-HGUT-023/MGYG-HGUT-02395/genomes5/GUT_GENOME005338.gff.gz	2
GUT_GENOME040701_00835	GUT_GENOME040679_01571	KEF28010.1	O-deglycosylation	1	748	1	748	748	97.727	0	1509	100	1992122	64	40528	59.52	96.88	1.33	GUT_GENOME142522	d__Bacteria;p__Actinobacteriota;c__Actinobacteria;o__Actinomycetales;f__Bifidobacteriaceae;g__Bifidobacterium;s__Bifidobacterium adolescentis	ERS1066705	ERP013933	United States	ftp://ftp.ebi.ac.uk/pub/databases/metagenomics/mgnify_genomes/human-gut/v1.0/all_genomes/MGYG-HGUT-023/MGYG-HGUT-02395/genomes1/GUT_GENOME040679.gff.gz	4
GUT_GENOME063913_00798	GUT_GENOME001916_01197	KEF28010.1	O-deglycosylation	1	748	1	748	748	97.727	0	1509	100	1509451	128	19745	60.73	71.86	2.82	GUT_GENOME142522	d__Bacteria;p__Actinobacteriota;c__Actinobacteria;o__Actinomycetales;f__Bifidobacteriaceae;g__Bifidobacterium;s__Bifidobacterium adolescentis	SRS1634656	SRP082656	Italy	ftp://ftp.ebi.ac.uk/pub/databases/metagenomics/mgnify_genomes/human-gut/v1.0/all_genomes/MGYG-HGUT-023/MGYG-HGUT-02395/genomes1/GUT_GENOME001916.gff.gz	45
GUT_GENOME064909_01283	GUT_GENOME064909_01283	KEF28010.1	O-deglycosylation	1	748	1	748	748	97.727	0	1511	100	1952356	123	28815	59.84	94.1	1.59	GUT_GENOME142522	d__Bacteria;p__Actinobacteriota;c__Actinobacteria;o__Actinomycetales;f__Bifidobacteriaceae;g__Bifidobacterium;s__Bifidobacterium adolescentis	ERS608564	ERP008729	Austria	ftp://ftp.ebi.ac.uk/pub/databases/metagenomics/mgnify_genomes/human-gut/v1.0/all_genomes/MGYG-HGUT-023/MGYG-HGUT-02395/genomes3/GUT_GENOME064909.gff.gz	1
GUT_GENOME067934_01886	GUT_GENOME067934_01886	KEF28010.1	O-deglycosylation	1	748	1	748	748	97.727	0	1509	100	2156407	277	12896	59.46	95.4	3.43	GUT_GENOME142522	d__Bacteria;p__Actinobacteriota;c__Actinobacteria;o__Actinomycetales;f__Bifidobacteriaceae;g__Bifidobacterium;s__Bifidobacterium adolescentis	ERS235589	ERP002469	Sweden	ftp://ftp.ebi.ac.uk/pub/databases/metagenomics/mgnify_genomes/human-gut/v1.0/all_genomes/MGYG-HGUT-023/MGYG-HGUT-02395/genomes2/GUT_GENOME067934.gff.gz	1
GUT_GENOME077533_01296	GUT_GENOME077533_01296	KEF28010.1	O-deglycosylation	1	748	1	748	748	97.727	0	1509	100	2333048	336	11462	59.51	97.71	2.31	GUT_GENOME142522	d__Bacteria;p__Actinobacteriota;c__Actinobacteria;o__Actinomycetales;f__Bifidobacteriaceae;g__Bifidobacterium;s__Bifidobacterium adolescentis	ERS473186	ERP005989	Sweden	ftp://ftp.ebi.ac.uk/pub/databases/metagenomics/mgnify_genomes/human-gut/v1.0/all_genomes/MGYG-HGUT-023/MGYG-HGUT-02395/genomes3/GUT_GENOME077533.gff.gz	1
GUT_GENOME102045_00562	GUT_GENOME102045_00562	KEF28010.1	O-deglycosylation	1	748	1	748	748	97.727	0	1510	100	1439114	43	59049	59.96	68.48	0.38	GUT_GENOME142522	d__Bacteria;p__Actinobacteriota;c__Actinobacteria;o__Actinomycetales;f__Bifidobacteriaceae;g__Bifidobacterium;s__Bifidobacterium adolescentis	SRS022071	SRP002163	United States	ftp://ftp.ebi.ac.uk/pub/databases/metagenomics/mgnify_genomes/human-gut/v1.0/all_genomes/MGYG-HGUT-023/MGYG-HGUT-02395/genomes5/GUT_GENOME102045.gff.gz	1
GUT_GENOME105247_01654	GUT_GENOME063543_00915	QBM20342.1	De-rhamnosylation	1	887	1	887	895	54.637	0	1013	99	2886808	378	9972	43.53	82.85	4.22	GUT_GENOME000004	d__Bacteria;p__Firmicutes_A;c__Clostridia;o__Lachnospirales;f__Lachnospiraceae;g__Blautia_A;s__Blautia_A sp900066165	ERS537199	ERP006678	China	ftp://ftp.ebi.ac.uk/pub/databases/metagenomics/mgnify_genomes/human-gut/v1.0/all_genomes/MGYG-HGUT-000/MGYG-HGUT-00002/genomes1/GUT_GENOME063543.gff.gz	2
GUT_GENOME128358_01336	GUT_GENOME128358_01336	KEF28010.1	O-deglycosylation	1	748	1	748	748	97.727	0	1510	100	1899847	174	16997	59.97	92.74	2.12	GUT_GENOME142522	d__Bacteria;p__Actinobacteriota;c__Actinobacteria;o__Actinomycetales;f__Bifidobacteriaceae;g__Bifidobacterium;s__Bifidobacterium adolescentis	SRS1596822	SRP080787	Mongolia	ftp://ftp.ebi.ac.uk/pub/databases/metagenomics/mgnify_genomes/human-gut/v1.0/all_genomes/MGYG-HGUT-023/MGYG-HGUT-02395/genomes1/GUT_GENOME128358.gff.gz	4
GUT_GENOME105888_00561	GUT_GENOME003937_00158	ANI69962.1	O-demethylation	2	257	1	255	257	40.078	5.76e-56	203	94	3368844	153	40992	43.45	93.99	4.58	GUT_GENOME000004	d__Bacteria;p__Firmicutes_A;c__Clostridia;o__Lachnospirales;f__Lachnospiraceae;g__Blautia_A;s__Blautia_A sp900066165	ERS473170	ERP005989	Sweden	ftp://ftp.ebi.ac.uk/pub/databases/metagenomics/mgnify_genomes/human-gut/v1.0/all_genomes/MGYG-HGUT-000/MGYG-HGUT-00002/genomes1/GUT_GENOME003937.gff.gz	16
GUT_GENOME105888_02183	GUT_GENOME072992_00192	CCC80442.1	De-rhamnosylation	4	523	3	521	525	43.048	3.85e-150	449	99	3505224	277	25338	43.42	84.65	1.85	GUT_GENOME000004	d__Bacteria;p__Firmicutes_A;c__Clostridia;o__Lachnospirales;f__Lachnospiraceae;g__Blautia_A;s__Blautia_A sp900066165	ERS396452	ERP004605	Spain	ftp://ftp.ebi.ac.uk/pub/databases/metagenomics/mgnify_genomes/human-gut/v1.0/all_genomes/MGYG-HGUT-000/MGYG-HGUT-00002/genomes1/GUT_GENOME072992.gff.gz	3
GUT_GENOME135615_00791	GUT_GENOME135615_00791	KEF28010.1	O-deglycosylation	1	748	1	748	748	97.727	0	1511	100	1832419	168	15875	59.73	95.16	1.36	GUT_GENOME142522	d__Bacteria;p__Actinobacteriota;c__Actinobacteria;o__Actinomycetales;f__Bifidobacteriaceae;g__Bifidobacterium;s__Bifidobacterium adolescentis	ERS199239	ERP002061	Spain	ftp://ftp.ebi.ac.uk/pub/databases/metagenomics/mgnify_genomes/human-gut/v1.0/all_genomes/MGYG-HGUT-023/MGYG-HGUT-02395/genomes2/GUT_GENOME135615.gff.gz	2
GUT_GENOME106155_01407	GUT_GENOME106155_01407	CCC80442.1	De-rhamnosylation	4	523	3	521	525	43.238	9.69e-152	453	99	2613310	110	42805	42.93	69.74	0	GUT_GENOME000004	d__Bacteria;p__Firmicutes_A;c__Clostridia;o__Lachnospirales;f__Lachnospiraceae;g__Blautia_A;s__Blautia_A sp900066165	ERS235565	ERP002469	Sweden	ftp://ftp.ebi.ac.uk/pub/databases/metagenomics/mgnify_genomes/human-gut/v1.0/all_genomes/MGYG-HGUT-000/MGYG-HGUT-00002/genomes1/GUT_GENOME106155.gff.gz	1
GUT_GENOME142517_01511	GUT_GENOME142517_01511	KEF28010.1	O-deglycosylation	1	748	1	748	748	97.727	0	1510	100	2375433	33	158163	59.32	100	0.83	GUT_GENOME142522	d__Bacteria;p__Actinobacteriota;c__Actinobacteria;o__Actinomycetales;f__Bifidobacteriaceae;g__Bifidobacterium;s__Bifidobacterium adolescentis	SAMN04231311	PRJNA300965	Italy	ftp://ftp.ebi.ac.uk/pub/databases/metagenomics/mgnify_genomes/human-gut/v1.0/all_genomes/MGYG-HGUT-023/MGYG-HGUT-02395/genomes3/GUT_GENOME142517.gff.gz	1
GUT_GENOME106276_00339	GUT_GENOME061951_00050	ANI69962.1	O-demethylation	2	257	1	255	257	40.078	1.11e-55	202	94	3112048	173	24757	43.45	88.9	1.08	GUT_GENOME000004	d__Bacteria;p__Firmicutes_A;c__Clostridia;o__Lachnospirales;f__Lachnospiraceae;g__Blautia_A;s__Blautia_A sp900066165	ERS473335	ERP005989	Denmark	ftp://ftp.ebi.ac.uk/pub/databases/metagenomics/mgnify_genomes/human-gut/v1.0/all_genomes/MGYG-HGUT-000/MGYG-HGUT-00002/genomes1/GUT_GENOME061951.gff.gz	17
GUT_GENOME181378_01379	GUT_GENOME128348_00763	KEF28010.1	O-deglycosylation	1	748	1	748	748	97.727	0	1513	100	1718046	223	10822	60.04	87.93	1.86	GUT_GENOME142522	d__Bacteria;p__Actinobacteriota;c__Actinobacteria;o__Actinomycetales;f__Bifidobacteriaceae;g__Bifidobacterium;s__Bifidobacterium adolescentis	SRS1596821	SRP080787	Mongolia	ftp://ftp.ebi.ac.uk/pub/databases/metagenomics/mgnify_genomes/human-gut/v1.0/all_genomes/MGYG-HGUT-023/MGYG-HGUT-02395/genomes2/GUT_GENOME128348.gff.gz	4
GUT_GENOME106426_00217	GUT_GENOME106426_00217	ANI69962.1	O-demethylation	2	257	1	255	257	40.078	5.53e-56	203	94	3201168	716	5395	43.51	70.81	2.87	GUT_GENOME000004	d__Bacteria;p__Firmicutes_A;c__Clostridia;o__Lachnospirales;f__Lachnospiraceae;g__Blautia_A;s__Blautia_A sp900066165	ERS235579	ERP002469	Sweden	ftp://ftp.ebi.ac.uk/pub/databases/metagenomics/mgnify_genomes/human-gut/v1.0/all_genomes/MGYG-HGUT-000/MGYG-HGUT-00002/genomes1/GUT_GENOME106426.gff.gz	1
GUT_GENOME266231_00993	GUT_GENOME266231_00993	KEF28010.1	O-deglycosylation	1	748	1	748	748	97.727	0	1511	100	1275636	88	25755	59.57	69.52	0.61	GUT_GENOME142522	d__Bacteria;p__Actinobacteriota;c__Actinobacteria;o__Actinomycetales;f__Bifidobacteriaceae;g__Bifidobacterium;s__Bifidobacterium adolescentis	ERS971651	ERP012929	Israel	ftp://ftp.ebi.ac.uk/pub/databases/metagenomics/mgnify_genomes/human-gut/v1.0/all_genomes/MGYG-HGUT-023/MGYG-HGUT-02395/genomes5/GUT_GENOME266231.gff.gz	1
GUT_GENOME276611_01134	GUT_GENOME276611_01134	KEF28010.1	O-deglycosylation	1	748	1	748	748	97.727	0	1511	100	1581879	29	100799	59.81	79.24	0	GUT_GENOME142522	d__Bacteria;p__Actinobacteriota;c__Actinobacteria;o__Actinomycetales;f__Bifidobacteriaceae;g__Bifidobacterium;s__Bifidobacterium adolescentis	ERS972241	ERP012929	Israel	ftp://ftp.ebi.ac.uk/pub/databases/metagenomics/mgnify_genomes/human-gut/v1.0/all_genomes/MGYG-HGUT-023/MGYG-HGUT-02395/genomes1/GUT_GENOME276611.gff.gz	1
GUT_GENOME106458_03082	GUT_GENOME106458_03082	CCC80442.1	De-rhamnosylation	4	523	3	521	525	43.238	9.69e-152	453	99	4062547	206	37511	43.18	97.34	1.71	GUT_GENOME000004	d__Bacteria;p__Firmicutes_A;c__Clostridia;o__Lachnospirales;f__Lachnospiraceae;g__Blautia_A;s__Blautia_A sp900066165	ERS235584	ERP002469	Sweden	ftp://ftp.ebi.ac.uk/pub/databases/metagenomics/mgnify_genomes/human-gut/v1.0/all_genomes/MGYG-HGUT-000/MGYG-HGUT-00002/genomes1/GUT_GENOME106458.gff.gz	1
GUT_GENOME277867_01107	GUT_GENOME277867_01107	KEF28010.1	O-deglycosylation	1	748	1	748	748	97.727	0	1511	100	1690743	239	10230	59.76	89.92	1.64	GUT_GENOME142522	d__Bacteria;p__Actinobacteriota;c__Actinobacteria;o__Actinomycetales;f__Bifidobacteriaceae;g__Bifidobacterium;s__Bifidobacterium adolescentis	ERS972315	ERP012929	Israel	ftp://ftp.ebi.ac.uk/pub/databases/metagenomics/mgnify_genomes/human-gut/v1.0/all_genomes/MGYG-HGUT-023/MGYG-HGUT-02395/genomes5/GUT_GENOME277867.gff.gz	1
GUT_GENOME138095_01067	GUT_GENOME106522_01518	KEF28010.1	O-deglycosylation	93	748	1	656	656	97.713	0	1322	88	1939305	227	11860	59.72	94.77	4.16	GUT_GENOME142522	d__Bacteria;p__Actinobacteriota;c__Actinobacteria;o__Actinomycetales;f__Bifidobacteriaceae;g__Bifidobacterium;s__Bifidobacterium adolescentis	ERS235589	ERP002469	Sweden	ftp://ftp.ebi.ac.uk/pub/databases/metagenomics/mgnify_genomes/human-gut/v1.0/all_genomes/MGYG-HGUT-023/MGYG-HGUT-02395/genomes2/GUT_GENOME106522.gff.gz	3
GUT_GENOME106556_02126	GUT_GENOME106556_02126	BBG22493.1	C-deglyc (PUE)	29	367	6	335	339	54.277	9.47e-124	369	92	2533182	203	20618	43.88	69	2.53	GUT_GENOME000004	d__Bacteria;p__Firmicutes_A;c__Clostridia;o__Lachnospirales;f__Lachnospiraceae;g__Blautia_A;s__Blautia_A sp900066165	ERS235591	ERP002469	Sweden	ftp://ftp.ebi.ac.uk/pub/databases/metagenomics/mgnify_genomes/human-gut/v1.0/all_genomes/MGYG-HGUT-000/MGYG-HGUT-00002/genomes1/GUT_GENOME106556.gff.gz	1
GUT_GENOME058759_00715	GUT_GENOME058759_00715	KEF28010.1	O-deglycosylation	1	608	1	608	608	97.697	0	1231	81	1894027	137	19338	59.87	91.75	3.05	GUT_GENOME142522	d__Bacteria;p__Actinobacteriota;c__Actinobacteria;o__Actinomycetales;f__Bifidobacteriaceae;g__Bifidobacterium;s__Bifidobacterium adolescentis	ERS473064	ERP005989	Denmark	ftp://ftp.ebi.ac.uk/pub/databases/metagenomics/mgnify_genomes/human-gut/v1.0/all_genomes/MGYG-HGUT-023/MGYG-HGUT-02395/genomes5/GUT_GENOME058759.gff.gz	1
GUT_GENOME106812_02284	GUT_GENOME094001_01707	BBG22495.1	C-deglyc (PUE)	1	324	1	325	325	52.308	8.18e-124	367	100	3784612	314	18767	43.03	92.59	3.59	GUT_GENOME000004	d__Bacteria;p__Firmicutes_A;c__Clostridia;o__Lachnospirales;f__Lachnospiraceae;g__Blautia_A;s__Blautia_A sp900066165	ERS608537	ERP008729	Austria	ftp://ftp.ebi.ac.uk/pub/databases/metagenomics/mgnify_genomes/human-gut/v1.0/all_genomes/MGYG-HGUT-000/MGYG-HGUT-00002/genomes1/GUT_GENOME094001.gff.gz	1
GUT_GENOME107249_00029	GUT_GENOME107249_00029	CCC80442.1	De-rhamnosylation	4	523	3	521	525	42.857	3.68e-149	447	99	3702461	242	25349	43.17	96.52	0.63	GUT_GENOME000004	d__Bacteria;p__Firmicutes_A;c__Clostridia;o__Lachnospirales;f__Lachnospiraceae;g__Blautia_A;s__Blautia_A sp900066165	SRS871957	SRP056054	Finland	ftp://ftp.ebi.ac.uk/pub/databases/metagenomics/mgnify_genomes/human-gut/v1.0/all_genomes/MGYG-HGUT-000/MGYG-HGUT-00002/genomes1/GUT_GENOME107249.gff.gz	1
GUT_GENOME239852_00899	GUT_GENOME239852_00899	KEF28001.1	O-deglycosylation	1	780	8	787	780	97.692	0	1566	100	1935517	215	12333	59.85	88.37	2.5	GUT_GENOME142522	d__Bacteria;p__Actinobacteriota;c__Actinobacteria;o__Actinomycetales;f__Bifidobacteriaceae;g__Bifidobacterium;s__Bifidobacterium adolescentis	SRS1719089	SRP090628	Russia	ftp://ftp.ebi.ac.uk/pub/databases/metagenomics/mgnify_genomes/human-gut/v1.0/all_genomes/MGYG-HGUT-023/MGYG-HGUT-02395/genomes4/GUT_GENOME239852.gff.gz	1
GUT_GENOME107831_01100	GUT_GENOME063147_01357	QBM20340.1	De-rhamnosylation	4	828	2	834	850	42.588	0	637	99	4470839	202	38128	42.65	91.76	5	GUT_GENOME000004	d__Bacteria;p__Firmicutes_A;c__Clostridia;o__Lachnospirales;f__Lachnospiraceae;g__Blautia_A;s__Blautia_A sp900066165	ERS537183	ERP006678	China	ftp://ftp.ebi.ac.uk/pub/databases/metagenomics/mgnify_genomes/human-gut/v1.0/all_genomes/MGYG-HGUT-000/MGYG-HGUT-00002/genomes1/GUT_GENOME063147.gff.gz	2
GUT_GENOME269314_00675	GUT_GENOME269314_00675	KEF28001.1	O-deglycosylation	1	780	1	780	780	97.692	0	1566	100	1587035	66	47085	59.36	82.21	0.51	GUT_GENOME142522	d__Bacteria;p__Actinobacteriota;c__Actinobacteria;o__Actinomycetales;f__Bifidobacteriaceae;g__Bifidobacterium;s__Bifidobacterium adolescentis	ERS971663	ERP012929	Israel	ftp://ftp.ebi.ac.uk/pub/databases/metagenomics/mgnify_genomes/human-gut/v1.0/all_genomes/MGYG-HGUT-023/MGYG-HGUT-02395/genomes4/GUT_GENOME269314.gff.gz	1
GUT_GENOME110843_01496	GUT_GENOME110843_01496	CCC80442.1	De-rhamnosylation	4	523	3	521	525	43.048	8.33e-151	451	99	4041686	813	6408	43.55	78.95	4.94	GUT_GENOME000004	d__Bacteria;p__Firmicutes_A;c__Clostridia;o__Lachnospirales;f__Lachnospiraceae;g__Blautia_A;s__Blautia_A sp900066165	ERS328903	ERP003612	Denmark	ftp://ftp.ebi.ac.uk/pub/databases/metagenomics/mgnify_genomes/human-gut/v1.0/all_genomes/MGYG-HGUT-000/MGYG-HGUT-00002/genomes1/GUT_GENOME110843.gff.gz	1
GUT_GENOME111949_00414	GUT_GENOME111949_00414	CCC80442.1	De-rhamnosylation	4	523	3	521	525	43.238	1.78e-151	452	99	2825945	193	23817	43.86	84.81	2.85	GUT_GENOME000004	d__Bacteria;p__Firmicutes_A;c__Clostridia;o__Lachnospirales;f__Lachnospiraceae;g__Blautia_A;s__Blautia_A sp900066165	ERS328933	ERP003612	Denmark	ftp://ftp.ebi.ac.uk/pub/databases/metagenomics/mgnify_genomes/human-gut/v1.0/all_genomes/MGYG-HGUT-000/MGYG-HGUT-00002/genomes1/GUT_GENOME111949.gff.gz	1
GUT_GENOME164075_01411	GUT_GENOME164075_01411	KEF28010.1	O-deglycosylation	143	748	1	606	606	97.69	0	1219	81	1943746	215	14426	59.84	97.04	1.31	GUT_GENOME142522	d__Bacteria;p__Actinobacteriota;c__Actinobacteria;o__Actinomycetales;f__Bifidobacteriaceae;g__Bifidobacterium;s__Bifidobacterium adolescentis	SRS1876486	SRP095580	Netherlands	ftp://ftp.ebi.ac.uk/pub/databases/metagenomics/mgnify_genomes/human-gut/v1.0/all_genomes/MGYG-HGUT-023/MGYG-HGUT-02395/genomes3/GUT_GENOME164075.gff.gz	1
GUT_GENOME118386_00520	GUT_GENOME118386_00520	CCC80442.1	De-rhamnosylation	4	523	3	521	525	43.238	9.69e-152	453	99	3728158	234	30058	43.31	95.28	2.93	GUT_GENOME000004	d__Bacteria;p__Firmicutes_A;c__Clostridia;o__Lachnospirales;f__Lachnospiraceae;g__Blautia_A;s__Blautia_A sp900066165	ERS396406	ERP004605	Spain	ftp://ftp.ebi.ac.uk/pub/databases/metagenomics/mgnify_genomes/human-gut/v1.0/all_genomes/MGYG-HGUT-000/MGYG-HGUT-00002/genomes1/GUT_GENOME118386.gff.gz	1
GUT_GENOME127821_00513	GUT_GENOME127821_00513	KEF28001.1	O-deglycosylation	31	780	1	750	750	97.6	0	1505	96	1496514	301	6162	60.53	79.62	2.45	GUT_GENOME142522	d__Bacteria;p__Actinobacteriota;c__Actinobacteria;o__Actinomycetales;f__Bifidobacteriaceae;g__Bifidobacterium;s__Bifidobacterium adolescentis	SRS1596801	SRP080787	Mongolia	ftp://ftp.ebi.ac.uk/pub/databases/metagenomics/mgnify_genomes/human-gut/v1.0/all_genomes/MGYG-HGUT-023/MGYG-HGUT-02395/genomes2/GUT_GENOME127821.gff.gz	1
GUT_GENOME119378_01669	GUT_GENOME065280_01475	CCC80442.1	De-rhamnosylation	4	523	3	521	525	43.238	1.53e-151	453	99	2768422	174	23908	43.52	82.89	3.74	GUT_GENOME000004	d__Bacteria;p__Firmicutes_A;c__Clostridia;o__Lachnospirales;f__Lachnospiraceae;g__Blautia_A;s__Blautia_A sp900066165	ERS608562	ERP008729	Austria	ftp://ftp.ebi.ac.uk/pub/databases/metagenomics/mgnify_genomes/human-gut/v1.0/all_genomes/MGYG-HGUT-000/MGYG-HGUT-00002/genomes1/GUT_GENOME065280.gff.gz	2
GUT_GENOME119378_01926	GUT_GENOME119378_01926	QBM20342.1	De-rhamnosylation	1	887	1	887	895	54.749	0	1016	99	3067358	304	17942	43.65	90.68	3.82	GUT_GENOME000004	d__Bacteria;p__Firmicutes_A;c__Clostridia;o__Lachnospirales;f__Lachnospiraceae;g__Blautia_A;s__Blautia_A sp900066165	ERS396441	ERP004605	Spain	ftp://ftp.ebi.ac.uk/pub/databases/metagenomics/mgnify_genomes/human-gut/v1.0/all_genomes/MGYG-HGUT-000/MGYG-HGUT-00002/genomes1/GUT_GENOME119378.gff.gz	1
GUT_GENOME119655_00982	GUT_GENOME072977_00135	QBM20342.1	De-rhamnosylation	1	887	1	887	895	54.972	0	1019	99	2828598	324	12510	43.52	81.07	1.38	GUT_GENOME000004	d__Bacteria;p__Firmicutes_A;c__Clostridia;o__Lachnospirales;f__Lachnospiraceae;g__Blautia_A;s__Blautia_A sp900066165	ERS396451	ERP004605	Spain	ftp://ftp.ebi.ac.uk/pub/databases/metagenomics/mgnify_genomes/human-gut/v1.0/all_genomes/MGYG-HGUT-000/MGYG-HGUT-00002/genomes1/GUT_GENOME072977.gff.gz	5
GUT_GENOME119655_01292	GUT_GENOME119655_01292	ANI69961.1	O-demethylation	13	210	152	349	199	47.236	3.34e-51	186	94	3916879	405	14666	42.7	90.15	3.66	GUT_GENOME000004	d__Bacteria;p__Firmicutes_A;c__Clostridia;o__Lachnospirales;f__Lachnospiraceae;g__Blautia_A;s__Blautia_A sp900066165	ERS396451	ERP004605	Spain	ftp://ftp.ebi.ac.uk/pub/databases/metagenomics/mgnify_genomes/human-gut/v1.0/all_genomes/MGYG-HGUT-000/MGYG-HGUT-00002/genomes1/GUT_GENOME119655.gff.gz	1
GUT_GENOME026998_00990	GUT_GENOME026998_00990	KEF28010.1	O-deglycosylation	1	748	1	748	748	97.594	0	1504	100	1300374	11	209519	59.63	64.09	0.38	GUT_GENOME142522	d__Bacteria;p__Actinobacteriota;c__Actinobacteria;o__Actinomycetales;f__Bifidobacteriaceae;g__Bifidobacterium;s__Bifidobacterium adolescentis	ERS1444629	ERP019502	Kazakhstan	ftp://ftp.ebi.ac.uk/pub/databases/metagenomics/mgnify_genomes/human-gut/v1.0/all_genomes/MGYG-HGUT-023/MGYG-HGUT-02395/genomes1/GUT_GENOME026998.gff.gz	2
GUT_GENOME119664_00480	GUT_GENOME000126_00661	CCC80440.1	De-rhamnosylation	9	628	6	643	638	44.671	0	585	95	4245524	109	82751	42.82	99.37	0	GUT_GENOME000004	d__Bacteria;p__Firmicutes_A;c__Clostridia;o__Lachnospirales;f__Lachnospiraceae;g__Blautia_A;s__Blautia_A sp900066165	ERS852401	ERP012217	United Kingdom	ftp://ftp.ebi.ac.uk/pub/databases/metagenomics/mgnify_genomes/human-gut/v1.0/all_genomes/MGYG-HGUT-000/MGYG-HGUT-00002/genomes1/GUT_GENOME000126.gff.gz	251
GUT_GENOME059697_00256	GUT_GENOME003594_00128	KEF28010.1	O-deglycosylation	1	748	1	748	748	97.594	0	1506	100	1598385	325	6264	59.27	75.26	3.69	GUT_GENOME142522	d__Bacteria;p__Actinobacteriota;c__Actinobacteria;o__Actinomycetales;f__Bifidobacteriaceae;g__Bifidobacterium;s__Bifidobacterium adolescentis	ERS473145	ERP005989	Sweden	ftp://ftp.ebi.ac.uk/pub/databases/metagenomics/mgnify_genomes/human-gut/v1.0/all_genomes/MGYG-HGUT-023/MGYG-HGUT-02395/genomes3/GUT_GENOME003594.gff.gz	4
GUT_GENOME180857_01661	GUT_GENOME180857_01661	KEF28010.1	O-deglycosylation	1	748	1	748	748	97.594	0	1509	100	2011161	159	18135	59.99	94.09	3.45	GUT_GENOME142522	d__Bacteria;p__Actinobacteriota;c__Actinobacteria;o__Actinomycetales;f__Bifidobacteriaceae;g__Bifidobacterium;s__Bifidobacterium adolescentis	SRS1596787	SRP080787	Mongolia	ftp://ftp.ebi.ac.uk/pub/databases/metagenomics/mgnify_genomes/human-gut/v1.0/all_genomes/MGYG-HGUT-023/MGYG-HGUT-02395/genomes3/GUT_GENOME180857.gff.gz	1
GUT_GENOME120005_00875	GUT_GENOME120005_00875	QBM20342.1	De-rhamnosylation	1	887	31	917	895	54.972	0	1019	99	3459354	691	6088	43.08	50.58	0	GUT_GENOME000004	d__Bacteria;p__Firmicutes_A;c__Clostridia;o__Lachnospirales;f__Lachnospiraceae;g__Blautia_A;s__Blautia_A sp900066165	ERS396464	ERP004605	Spain	ftp://ftp.ebi.ac.uk/pub/databases/metagenomics/mgnify_genomes/human-gut/v1.0/all_genomes/MGYG-HGUT-000/MGYG-HGUT-00002/genomes1/GUT_GENOME120005.gff.gz	3
GUT_GENOME120005_01040	GUT_GENOME120005_01040	CCC80442.1	De-rhamnosylation	16	524	6	509	516	41.667	4.24e-135	410	97	3459354	691	6088	43.08	50.58	0	GUT_GENOME000004	d__Bacteria;p__Firmicutes_A;c__Clostridia;o__Lachnospirales;f__Lachnospiraceae;g__Blautia_A;s__Blautia_A sp900066165	ERS396464	ERP004605	Spain	ftp://ftp.ebi.ac.uk/pub/databases/metagenomics/mgnify_genomes/human-gut/v1.0/all_genomes/MGYG-HGUT-000/MGYG-HGUT-00002/genomes1/GUT_GENOME120005.gff.gz	1
GUT_GENOME120005_01104	GUT_GENOME120005_01104	QBM20342.1	De-rhamnosylation	1	887	1	887	895	52.737	0	991	99	3459354	691	6088	43.08	50.58	0	GUT_GENOME000004	d__Bacteria;p__Firmicutes_A;c__Clostridia;o__Lachnospirales;f__Lachnospiraceae;g__Blautia_A;s__Blautia_A sp900066165	ERS396464	ERP004605	Spain	ftp://ftp.ebi.ac.uk/pub/databases/metagenomics/mgnify_genomes/human-gut/v1.0/all_genomes/MGYG-HGUT-000/MGYG-HGUT-00002/genomes1/GUT_GENOME120005.gff.gz	1
GUT_GENOME181772_01411	GUT_GENOME181772_01411	KEF28010.1	O-deglycosylation	1	748	1	748	748	97.594	0	1508	100	2126250	78	53353	59.4	92.14	1.95	GUT_GENOME142522	d__Bacteria;p__Actinobacteriota;c__Actinobacteria;o__Actinomycetales;f__Bifidobacteriaceae;g__Bifidobacterium;s__Bifidobacterium adolescentis	SRS1719090	SRP090628	Estonia	ftp://ftp.ebi.ac.uk/pub/databases/metagenomics/mgnify_genomes/human-gut/v1.0/all_genomes/MGYG-HGUT-023/MGYG-HGUT-02395/genomes4/GUT_GENOME181772.gff.gz	5
GUT_GENOME121692_00067	GUT_GENOME121692_00067	QBM20342.1	De-rhamnosylation	1	887	1	887	895	54.86	0	1017	99	3534250	203	30191	43.3	93.27	0.06	GUT_GENOME000004	d__Bacteria;p__Firmicutes_A;c__Clostridia;o__Lachnospirales;f__Lachnospiraceae;g__Blautia_A;s__Blautia_A sp900066165	ERS396516	ERP004605	Spain	ftp://ftp.ebi.ac.uk/pub/databases/metagenomics/mgnify_genomes/human-gut/v1.0/all_genomes/MGYG-HGUT-000/MGYG-HGUT-00002/genomes1/GUT_GENOME121692.gff.gz	1
GUT_GENOME125797_00234	GUT_GENOME125797_00234	CCC80442.1	De-rhamnosylation	4	523	3	521	525	43.238	7.89e-151	451	99	3811334	321	20718	43.26	91.91	4.43	GUT_GENOME000004	d__Bacteria;p__Firmicutes_A;c__Clostridia;o__Lachnospirales;f__Lachnospiraceae;g__Blautia_A;s__Blautia_A sp900066165	ERS1069643	ERP013827	Netherlands	ftp://ftp.ebi.ac.uk/pub/databases/metagenomics/mgnify_genomes/human-gut/v1.0/all_genomes/MGYG-HGUT-000/MGYG-HGUT-00002/genomes1/GUT_GENOME125797.gff.gz	1
GUT_GENOME203924_01115	GUT_GENOME203924_01115	KEF28010.1	O-deglycosylation	1	748	1	748	748	97.594	0	1504	100	1899895	191	14328	59.7	90.57	2.36	GUT_GENOME142522	d__Bacteria;p__Actinobacteriota;c__Actinobacteria;o__Actinomycetales;f__Bifidobacteriaceae;g__Bifidobacterium;s__Bifidobacterium adolescentis	SRS1996016	SRP100518	Spain	ftp://ftp.ebi.ac.uk/pub/databases/metagenomics/mgnify_genomes/human-gut/v1.0/all_genomes/MGYG-HGUT-023/MGYG-HGUT-02395/genomes3/GUT_GENOME203924.gff.gz	1
GUT_GENOME125797_02807	GUT_GENOME125797_02807	CCC80442.1	De-rhamnosylation	16	524	15	521	511	47.554	1.85e-164	486	97	3811334	321	20718	43.26	91.91	4.43	GUT_GENOME000004	d__Bacteria;p__Firmicutes_A;c__Clostridia;o__Lachnospirales;f__Lachnospiraceae;g__Blautia_A;s__Blautia_A sp900066165	ERS1069643	ERP013827	Netherlands	ftp://ftp.ebi.ac.uk/pub/databases/metagenomics/mgnify_genomes/human-gut/v1.0/all_genomes/MGYG-HGUT-000/MGYG-HGUT-00002/genomes1/GUT_GENOME125797.gff.gz	1
GUT_GENOME126002_01107	GUT_GENOME126002_01107	CCC80442.1	De-rhamnosylation	4	523	3	521	525	43.238	1.78e-151	452	99	2004849	366	6979	44.69	68.73	1.79	GUT_GENOME000004	d__Bacteria;p__Firmicutes_A;c__Clostridia;o__Lachnospirales;f__Lachnospiraceae;g__Blautia_A;s__Blautia_A sp900066165	ERS1069650	ERP013827	Netherlands	ftp://ftp.ebi.ac.uk/pub/databases/metagenomics/mgnify_genomes/human-gut/v1.0/all_genomes/MGYG-HGUT-000/MGYG-HGUT-00002/genomes1/GUT_GENOME126002.gff.gz	1
GUT_GENOME126057_00630	GUT_GENOME126057_00630	QBM20342.1	De-rhamnosylation	1	887	1	887	895	54.525	0	1013	99	2646553	158	31155	43.91	78.68	0.32	GUT_GENOME000004	d__Bacteria;p__Firmicutes_A;c__Clostridia;o__Lachnospirales;f__Lachnospiraceae;g__Blautia_A;s__Blautia_A sp900066165	ERS1069652	ERP013827	Netherlands	ftp://ftp.ebi.ac.uk/pub/databases/metagenomics/mgnify_genomes/human-gut/v1.0/all_genomes/MGYG-HGUT-000/MGYG-HGUT-00002/genomes1/GUT_GENOME126057.gff.gz	2
GUT_GENOME126070_00266	GUT_GENOME053402_01369	CCC80440.1	De-rhamnosylation	9	624	6	630	626	45.527	0	594	94	2838964	360	10568	43.5	79.27	3.09	GUT_GENOME000004	d__Bacteria;p__Firmicutes_A;c__Clostridia;o__Lachnospirales;f__Lachnospiraceae;g__Blautia_A;s__Blautia_A sp900066165	ERS199384	ERP002061	Spain	ftp://ftp.ebi.ac.uk/pub/databases/metagenomics/mgnify_genomes/human-gut/v1.0/all_genomes/MGYG-HGUT-000/MGYG-HGUT-00002/genomes1/GUT_GENOME053402.gff.gz	9
GUT_GENOME218723_01582	GUT_GENOME218723_01582	KEF28010.1	O-deglycosylation	1	748	1	748	748	97.594	0	1511	100	1887780	251	13086	59.94	98.13	3.48	GUT_GENOME142522	d__Bacteria;p__Actinobacteriota;c__Actinobacteria;o__Actinomycetales;f__Bifidobacteriaceae;g__Bifidobacterium;s__Bifidobacterium adolescentis	SRS1170842	SRP066479	Peru	ftp://ftp.ebi.ac.uk/pub/databases/metagenomics/mgnify_genomes/human-gut/v1.0/all_genomes/MGYG-HGUT-023/MGYG-HGUT-02395/genomes1/GUT_GENOME218723.gff.gz	1
GUT_GENOME126233_01961	GUT_GENOME126233_01961	CCC80442.1	De-rhamnosylation	4	523	3	521	525	43.238	1.78e-151	452	99	3874222	435	14195	43.15	92.65	2.22	GUT_GENOME000004	d__Bacteria;p__Firmicutes_A;c__Clostridia;o__Lachnospirales;f__Lachnospiraceae;g__Blautia_A;s__Blautia_A sp900066165	ERS1069659	ERP013827	Netherlands	ftp://ftp.ebi.ac.uk/pub/databases/metagenomics/mgnify_genomes/human-gut/v1.0/all_genomes/MGYG-HGUT-000/MGYG-HGUT-00002/genomes1/GUT_GENOME126233.gff.gz	1
GUT_GENOME220921_00421	GUT_GENOME220921_00421	KEF28010.1	O-deglycosylation	1	748	1	748	748	97.594	0	1511	100	1893718	276	11897	59.85	95.74	3.05	GUT_GENOME142522	d__Bacteria;p__Actinobacteriota;c__Actinobacteria;o__Actinomycetales;f__Bifidobacteriaceae;g__Bifidobacterium;s__Bifidobacterium adolescentis	SRS1596813	SRP080787	Mongolia	ftp://ftp.ebi.ac.uk/pub/databases/metagenomics/mgnify_genomes/human-gut/v1.0/all_genomes/MGYG-HGUT-023/MGYG-HGUT-02395/genomes2/GUT_GENOME220921.gff.gz	1
GUT_GENOME126465_00315	GUT_GENOME126465_00315	CCC80442.1	De-rhamnosylation	4	523	3	521	525	43.048	1.2e-149	448	99	2045642	432	5880	44.18	70.23	2.22	GUT_GENOME000004	d__Bacteria;p__Firmicutes_A;c__Clostridia;o__Lachnospirales;f__Lachnospiraceae;g__Blautia_A;s__Blautia_A sp900066165	ERS1069669	ERP013827	Netherlands	ftp://ftp.ebi.ac.uk/pub/databases/metagenomics/mgnify_genomes/human-gut/v1.0/all_genomes/MGYG-HGUT-000/MGYG-HGUT-00002/genomes1/GUT_GENOME126465.gff.gz	1
GUT_GENOME271675_01282	GUT_GENOME271675_01282	KEF28010.1	O-deglycosylation	1	748	1	748	748	97.594	0	1508	100	1517549	5	572675	59.74	82.27	0	GUT_GENOME142522	d__Bacteria;p__Actinobacteriota;c__Actinobacteria;o__Actinomycetales;f__Bifidobacteriaceae;g__Bifidobacterium;s__Bifidobacterium adolescentis	ERS972006	ERP012929	Israel	ftp://ftp.ebi.ac.uk/pub/databases/metagenomics/mgnify_genomes/human-gut/v1.0/all_genomes/MGYG-HGUT-023/MGYG-HGUT-02395/genomes4/GUT_GENOME271675.gff.gz	2
GUT_GENOME129921_01574	GUT_GENOME129921_01574	CCC80442.1	De-rhamnosylation	4	523	3	521	525	43.238	1.48e-151	453	99	3544576	391	13020	43.21	89.23	4.17	GUT_GENOME000004	d__Bacteria;p__Firmicutes_A;c__Clostridia;o__Lachnospirales;f__Lachnospiraceae;g__Blautia_A;s__Blautia_A sp900066165	SRS1994029	SRP100446	United States	ftp://ftp.ebi.ac.uk/pub/databases/metagenomics/mgnify_genomes/human-gut/v1.0/all_genomes/MGYG-HGUT-000/MGYG-HGUT-00002/genomes1/GUT_GENOME129921.gff.gz	2
GUT_GENOME129921_01926	GUT_GENOME129921_01926	QBM20342.1	De-rhamnosylation	1	887	1	887	895	54.86	0	1018	99	3544576	391	13020	43.21	89.23	4.17	GUT_GENOME000004	d__Bacteria;p__Firmicutes_A;c__Clostridia;o__Lachnospirales;f__Lachnospiraceae;g__Blautia_A;s__Blautia_A sp900066165	SRS1994029	SRP100446	United States	ftp://ftp.ebi.ac.uk/pub/databases/metagenomics/mgnify_genomes/human-gut/v1.0/all_genomes/MGYG-HGUT-000/MGYG-HGUT-00002/genomes1/GUT_GENOME129921.gff.gz	1
GUT_GENOME129921_02908	GUT_GENOME129921_02908	ANI69961.1	O-demethylation	13	210	10	207	199	47.236	5.14e-52	187	94	3544576	391	13020	43.21	89.23	4.17	GUT_GENOME000004	d__Bacteria;p__Firmicutes_A;c__Clostridia;o__Lachnospirales;f__Lachnospiraceae;g__Blautia_A;s__Blautia_A sp900066165	SRS1994029	SRP100446	United States	ftp://ftp.ebi.ac.uk/pub/databases/metagenomics/mgnify_genomes/human-gut/v1.0/all_genomes/MGYG-HGUT-000/MGYG-HGUT-00002/genomes1/GUT_GENOME129921.gff.gz	1
GUT_GENOME274501_01476	GUT_GENOME086428_01197	KEF28010.1	O-deglycosylation	1	748	1	748	748	97.594	0	1508	100	1922826	164	18966	59.77	96.47	1.52	GUT_GENOME142522	d__Bacteria;p__Actinobacteriota;c__Actinobacteria;o__Actinomycetales;f__Bifidobacteriaceae;g__Bifidobacterium;s__Bifidobacterium adolescentis	ERS537389	ERP006678	China	ftp://ftp.ebi.ac.uk/pub/databases/metagenomics/mgnify_genomes/human-gut/v1.0/all_genomes/MGYG-HGUT-023/MGYG-HGUT-02395/genomes3/GUT_GENOME086428.gff.gz	6
GUT_GENOME278723_00699	GUT_GENOME278723_00699	KEF28010.1	O-deglycosylation	1	748	1	748	748	97.594	0	1506	100	1408283	376	4035	60.3	70.65	2.48	GUT_GENOME142522	d__Bacteria;p__Actinobacteriota;c__Actinobacteria;o__Actinomycetales;f__Bifidobacteriaceae;g__Bifidobacterium;s__Bifidobacterium adolescentis	ERS972359	ERP012929	Israel	ftp://ftp.ebi.ac.uk/pub/databases/metagenomics/mgnify_genomes/human-gut/v1.0/all_genomes/MGYG-HGUT-023/MGYG-HGUT-02395/genomes3/GUT_GENOME278723.gff.gz	1
GUT_GENOME130840_01816	GUT_GENOME130840_01816	CCC80442.1	De-rhamnosylation	16	524	6	509	514	41.44	2.66e-135	411	97	4216827	579	10407	42.62	92.46	3.1	GUT_GENOME000004	d__Bacteria;p__Firmicutes_A;c__Clostridia;o__Lachnospirales;f__Lachnospiraceae;g__Blautia_A;s__Blautia_A sp900066165	SRS1993545	SRP100446	United States	ftp://ftp.ebi.ac.uk/pub/databases/metagenomics/mgnify_genomes/human-gut/v1.0/all_genomes/MGYG-HGUT-000/MGYG-HGUT-00002/genomes1/GUT_GENOME130840.gff.gz	1
GUT_GENOME218107_00755	GUT_GENOME218107_00755	KEF28001.1	O-deglycosylation	40	780	1	741	741	97.571	0	1487	95	1888936	165	20717	60.46	98.35	0.51	GUT_GENOME142522	d__Bacteria;p__Actinobacteriota;c__Actinobacteria;o__Actinomycetales;f__Bifidobacteriaceae;g__Bifidobacterium;s__Bifidobacterium adolescentis	SRS1170720	SRP066479	Peru	ftp://ftp.ebi.ac.uk/pub/databases/metagenomics/mgnify_genomes/human-gut/v1.0/all_genomes/MGYG-HGUT-023/MGYG-HGUT-02395/genomes3/GUT_GENOME218107.gff.gz	1
GUT_GENOME130840_02561	GUT_GENOME130840_02561	CCC80442.1	De-rhamnosylation	4	523	3	521	525	43.238	1.78e-151	452	99	4216827	579	10407	42.62	92.46	3.1	GUT_GENOME000004	d__Bacteria;p__Firmicutes_A;c__Clostridia;o__Lachnospirales;f__Lachnospiraceae;g__Blautia_A;s__Blautia_A sp900066165	SRS1993545	SRP100446	United States	ftp://ftp.ebi.ac.uk/pub/databases/metagenomics/mgnify_genomes/human-gut/v1.0/all_genomes/MGYG-HGUT-000/MGYG-HGUT-00002/genomes1/GUT_GENOME130840.gff.gz	1
GUT_GENOME131563_02084	GUT_GENOME130840_00212	EIM58369.1	C-deglyc (Ec)	3	357	2	348	355	54.648	2.72e-136	401	99	4216827	579	10407	42.62	92.46	3.1	GUT_GENOME000004	d__Bacteria;p__Firmicutes_A;c__Clostridia;o__Lachnospirales;f__Lachnospiraceae;g__Blautia_A;s__Blautia_A sp900066165	SRS1993545	SRP100446	United States	ftp://ftp.ebi.ac.uk/pub/databases/metagenomics/mgnify_genomes/human-gut/v1.0/all_genomes/MGYG-HGUT-000/MGYG-HGUT-00002/genomes1/GUT_GENOME130840.gff.gz	1
GUT_GENOME025080_01078	GUT_GENOME025080_01078	KEF28001.1	O-deglycosylation	41	780	1	740	740	97.568	0	1485	95	1439640	123	18048	59.86	81.42	0.61	GUT_GENOME142522	d__Bacteria;p__Actinobacteriota;c__Actinobacteria;o__Actinomycetales;f__Bifidobacteriaceae;g__Bifidobacterium;s__Bifidobacterium adolescentis	ERS1444567	ERP019502	Kazakhstan	ftp://ftp.ebi.ac.uk/pub/databases/metagenomics/mgnify_genomes/human-gut/v1.0/all_genomes/MGYG-HGUT-023/MGYG-HGUT-02395/genomes4/GUT_GENOME025080.gff.gz	1
GUT_GENOME137098_00242	GUT_GENOME137098_00242	CCC80442.1	De-rhamnosylation	4	523	3	521	525	43.238	7.97e-152	454	99	4381376	279	27996	42.75	95	3.7	GUT_GENOME000004	d__Bacteria;p__Firmicutes_A;c__Clostridia;o__Lachnospirales;f__Lachnospiraceae;g__Blautia_A;s__Blautia_A sp900066165	ERS199311	ERP002061	Spain	ftp://ftp.ebi.ac.uk/pub/databases/metagenomics/mgnify_genomes/human-gut/v1.0/all_genomes/MGYG-HGUT-000/MGYG-HGUT-00002/genomes1/GUT_GENOME137098.gff.gz	1
GUT_GENOME129371_01250	GUT_GENOME129371_01250	KEF28001.1	O-deglycosylation	41	780	1	740	740	97.568	0	1486	95	1869531	248	11227	60.1	92.5	3.26	GUT_GENOME142522	d__Bacteria;p__Actinobacteriota;c__Actinobacteria;o__Actinomycetales;f__Bifidobacteriaceae;g__Bifidobacterium;s__Bifidobacterium adolescentis	SRS1596865	SRP080787	Mongolia	ftp://ftp.ebi.ac.uk/pub/databases/metagenomics/mgnify_genomes/human-gut/v1.0/all_genomes/MGYG-HGUT-023/MGYG-HGUT-02395/genomes5/GUT_GENOME129371.gff.gz	1
GUT_GENOME227034_00307	GUT_GENOME150348_00187	KEF28001.1	O-deglycosylation	1	780	8	787	780	97.564	0	1570	100	1860747	332	7663	59.39	91.92	1.62	GUT_GENOME142522	d__Bacteria;p__Actinobacteriota;c__Actinobacteria;o__Actinomycetales;f__Bifidobacteriaceae;g__Bifidobacterium;s__Bifidobacterium adolescentis	SRS259539	SRP008047	China	ftp://ftp.ebi.ac.uk/pub/databases/metagenomics/mgnify_genomes/human-gut/v1.0/all_genomes/MGYG-HGUT-023/MGYG-HGUT-02395/genomes4/GUT_GENOME150348.gff.gz	3
GUT_GENOME048262_01556	GUT_GENOME048262_01556	KEF28010.1	O-deglycosylation	143	748	1	606	606	97.525	0	1216	81	2022335	74	40077	59.56	98.86	1.15	GUT_GENOME142522	d__Bacteria;p__Actinobacteriota;c__Actinobacteria;o__Actinomycetales;f__Bifidobacteriaceae;g__Bifidobacterium;s__Bifidobacterium adolescentis	ERS1647312	ERP019674	Germany	ftp://ftp.ebi.ac.uk/pub/databases/metagenomics/mgnify_genomes/human-gut/v1.0/all_genomes/MGYG-HGUT-023/MGYG-HGUT-02395/genomes1/GUT_GENOME048262.gff.gz	1
GUT_GENOME253487_01623	GUT_GENOME253487_01623	KEF28001.1	O-deglycosylation	31	780	1	750	750	97.467	0	1500	96	1952851	155	18648	59.61	89.32	1.77	GUT_GENOME142522	d__Bacteria;p__Actinobacteriota;c__Actinobacteria;o__Actinomycetales;f__Bifidobacteriaceae;g__Bifidobacterium;s__Bifidobacterium adolescentis	ERS746890	ERP010700	United Kingdom	ftp://ftp.ebi.ac.uk/pub/databases/metagenomics/mgnify_genomes/human-gut/v1.0/all_genomes/MGYG-HGUT-023/MGYG-HGUT-02395/genomes4/GUT_GENOME253487.gff.gz	1
GUT_GENOME137835_02233	GUT_GENOME137835_02233	CCC80442.1	De-rhamnosylation	4	523	3	521	525	43.238	9.69e-152	453	99	2806449	404	9793	43.73	89.35	3.96	GUT_GENOME000004	d__Bacteria;p__Firmicutes_A;c__Clostridia;o__Lachnospirales;f__Lachnospiraceae;g__Blautia_A;s__Blautia_A sp900066165	ERS199352	ERP002061	Spain	ftp://ftp.ebi.ac.uk/pub/databases/metagenomics/mgnify_genomes/human-gut/v1.0/all_genomes/MGYG-HGUT-000/MGYG-HGUT-00002/genomes1/GUT_GENOME137835.gff.gz	1
GUT_GENOME137883_00353	GUT_GENOME137883_00353	CCC80442.1	De-rhamnosylation	4	523	3	521	525	43.238	9.69e-152	453	99	3812297	256	28031	43.45	95.31	3.48	GUT_GENOME000004	d__Bacteria;p__Firmicutes_A;c__Clostridia;o__Lachnospirales;f__Lachnospiraceae;g__Blautia_A;s__Blautia_A sp900066165	ERS199353	ERP002061	Spain	ftp://ftp.ebi.ac.uk/pub/databases/metagenomics/mgnify_genomes/human-gut/v1.0/all_genomes/MGYG-HGUT-000/MGYG-HGUT-00002/genomes1/GUT_GENOME137883.gff.gz	1
GUT_GENOME022066_00384	GUT_GENOME022066_00384	KEF28010.1	O-deglycosylation	1	748	1	748	748	97.46	0	1509	100	1478786	31	85521	59.79	76.52	0.55	GUT_GENOME142522	d__Bacteria;p__Actinobacteriota;c__Actinobacteria;o__Actinomycetales;f__Bifidobacteriaceae;g__Bifidobacterium;s__Bifidobacterium adolescentis	ERS1444467	ERP019502	Kazakhstan	ftp://ftp.ebi.ac.uk/pub/databases/metagenomics/mgnify_genomes/human-gut/v1.0/all_genomes/MGYG-HGUT-023/MGYG-HGUT-02395/genomes4/GUT_GENOME022066.gff.gz	1
GUT_GENOME137883_01887	GUT_GENOME067568_00132	QBM20342.1	De-rhamnosylation	1	887	1	887	895	54.749	0	1017	99	4000618	357	30296	43.2	98.1	0	GUT_GENOME000004	d__Bacteria;p__Firmicutes_A;c__Clostridia;o__Lachnospirales;f__Lachnospiraceae;g__Blautia_A;s__Blautia_A sp900066165	ERS235565	ERP002469	Sweden	ftp://ftp.ebi.ac.uk/pub/databases/metagenomics/mgnify_genomes/human-gut/v1.0/all_genomes/MGYG-HGUT-000/MGYG-HGUT-00002/genomes1/GUT_GENOME067568.gff.gz	6
GUT_GENOME030472_00637	GUT_GENOME030472_00637	KEF28010.1	O-deglycosylation	1	748	1	748	748	97.46	0	1506	100	1181286	47	40279	59.25	61.36	0.86	GUT_GENOME142522	d__Bacteria;p__Actinobacteriota;c__Actinobacteria;o__Actinomycetales;f__Bifidobacteriaceae;g__Bifidobacterium;s__Bifidobacterium adolescentis	ERS848687	ERP012177	China	ftp://ftp.ebi.ac.uk/pub/databases/metagenomics/mgnify_genomes/human-gut/v1.0/all_genomes/MGYG-HGUT-023/MGYG-HGUT-02395/genomes1/GUT_GENOME030472.gff.gz	1
GUT_GENOME137883_02685	GUT_GENOME137883_02685	BBG22493.1	C-deglyc (PUE)	1	367	1	357	367	51.771	2.76e-131	389	100	3812297	256	28031	43.45	95.31	3.48	GUT_GENOME000004	d__Bacteria;p__Firmicutes_A;c__Clostridia;o__Lachnospirales;f__Lachnospiraceae;g__Blautia_A;s__Blautia_A sp900066165	ERS199353	ERP002061	Spain	ftp://ftp.ebi.ac.uk/pub/databases/metagenomics/mgnify_genomes/human-gut/v1.0/all_genomes/MGYG-HGUT-000/MGYG-HGUT-00002/genomes1/GUT_GENOME137883.gff.gz	1
GUT_GENOME084743_01291	GUT_GENOME084743_01291	KEF28010.1	O-deglycosylation	1	748	1	748	748	97.46	0	1512	100	1986737	100	42506	59.34	99.78	1.15	GUT_GENOME142522	d__Bacteria;p__Actinobacteriota;c__Actinobacteria;o__Actinomycetales;f__Bifidobacteriaceae;g__Bifidobacterium;s__Bifidobacterium adolescentis	ERS537331	ERP006678	China	ftp://ftp.ebi.ac.uk/pub/databases/metagenomics/mgnify_genomes/human-gut/v1.0/all_genomes/MGYG-HGUT-023/MGYG-HGUT-02395/genomes4/GUT_GENOME084743.gff.gz	1
GUT_GENOME138730_00322	GUT_GENOME053402_01473	CCC80442.1	De-rhamnosylation	4	523	3	521	525	43.048	1.05e-149	448	99	2838964	360	10568	43.5	79.27	3.09	GUT_GENOME000004	d__Bacteria;p__Firmicutes_A;c__Clostridia;o__Lachnospirales;f__Lachnospiraceae;g__Blautia_A;s__Blautia_A sp900066165	ERS199384	ERP002061	Spain	ftp://ftp.ebi.ac.uk/pub/databases/metagenomics/mgnify_genomes/human-gut/v1.0/all_genomes/MGYG-HGUT-000/MGYG-HGUT-00002/genomes1/GUT_GENOME053402.gff.gz	9
GUT_GENOME103464_00761	GUT_GENOME103464_00761	KEF28010.1	O-deglycosylation	1	748	1	748	748	97.46	0	1505	100	1980892	115	45996	59.81	98.29	2.27	GUT_GENOME142522	d__Bacteria;p__Actinobacteriota;c__Actinobacteria;o__Actinomycetales;f__Bifidobacteriaceae;g__Bifidobacterium;s__Bifidobacterium adolescentis	ERS1491743	ERP020739	United Kingdom	ftp://ftp.ebi.ac.uk/pub/databases/metagenomics/mgnify_genomes/human-gut/v1.0/all_genomes/MGYG-HGUT-023/MGYG-HGUT-02395/genomes3/GUT_GENOME103464.gff.gz	1
GUT_GENOME139207_01194	GUT_GENOME139207_01194	KEF28010.1	O-deglycosylation	1	748	1	748	748	97.46	0	1508	100	2007626	35	90790	59.39	93.13	0.45	GUT_GENOME142522	d__Bacteria;p__Actinobacteriota;c__Actinobacteria;o__Actinomycetales;f__Bifidobacteriaceae;g__Bifidobacterium;s__Bifidobacterium adolescentis	SRS820586	SRP052307	United States	ftp://ftp.ebi.ac.uk/pub/databases/metagenomics/mgnify_genomes/human-gut/v1.0/all_genomes/MGYG-HGUT-023/MGYG-HGUT-02395/genomes5/GUT_GENOME139207.gff.gz	1
GUT_GENOME181330_01210	GUT_GENOME128604_01457	KEF28010.1	O-deglycosylation	1	748	1	748	748	97.46	0	1506	100	2078796	56	73898	59.37	96.3	0.2	GUT_GENOME142522	d__Bacteria;p__Actinobacteriota;c__Actinobacteria;o__Actinomycetales;f__Bifidobacteriaceae;g__Bifidobacterium;s__Bifidobacterium adolescentis	SRS1596830	SRP080787	Mongolia	ftp://ftp.ebi.ac.uk/pub/databases/metagenomics/mgnify_genomes/human-gut/v1.0/all_genomes/MGYG-HGUT-023/MGYG-HGUT-02395/genomes3/GUT_GENOME128604.gff.gz	3
GUT_GENOME124892_01349	GUT_GENOME124892_01349	KEF28010.1	O-deglycosylation	41	748	1	708	708	97.458	0	1427	95	1618744	173	16851	59.82	78.52	1.14	GUT_GENOME142522	d__Bacteria;p__Actinobacteriota;c__Actinobacteria;o__Actinomycetales;f__Bifidobacteriaceae;g__Bifidobacterium;s__Bifidobacterium adolescentis	ERS1138749	ERP015450	China	ftp://ftp.ebi.ac.uk/pub/databases/metagenomics/mgnify_genomes/human-gut/v1.0/all_genomes/MGYG-HGUT-023/MGYG-HGUT-02395/genomes4/GUT_GENOME124892.gff.gz	1
GUT_GENOME147615_02914	GUT_GENOME147615_02914	CCC80442.1	De-rhamnosylation	4	523	3	521	525	42.857	5.75e-150	449	99	4365692	89	95560	42.63	98.73	0	GUT_GENOME000004	d__Bacteria;p__Firmicutes_A;c__Clostridia;o__Lachnospirales;f__Lachnospiraceae;g__Blautia_A;s__Blautia_A sp900066165	SAMEA3545421	PRJEB10915	United Kingdom	ftp://ftp.ebi.ac.uk/pub/databases/metagenomics/mgnify_genomes/human-gut/v1.0/all_genomes/MGYG-HGUT-000/MGYG-HGUT-00002/genomes1/GUT_GENOME147615.gff.gz	1
GUT_GENOME147615_02990	GUT_GENOME060362_01086	ANI69962.1	O-demethylation	2	257	1	255	257	40.078	6.42e-56	203	94	2937180	184	26305	43.45	74.09	1.9	GUT_GENOME000004	d__Bacteria;p__Firmicutes_A;c__Clostridia;o__Lachnospirales;f__Lachnospiraceae;g__Blautia_A;s__Blautia_A sp900066165	ERS473202	ERP005989	Denmark	ftp://ftp.ebi.ac.uk/pub/databases/metagenomics/mgnify_genomes/human-gut/v1.0/all_genomes/MGYG-HGUT-000/MGYG-HGUT-00002/genomes1/GUT_GENOME060362.gff.gz	4
GUT_GENOME249587_01401	GUT_GENOME249587_01401	KEF28010.1	O-deglycosylation	41	748	1	708	708	97.458	0	1427	95	2042203	143	21998	59.4	99.38	1.67	GUT_GENOME142522	d__Bacteria;p__Actinobacteriota;c__Actinobacteria;o__Actinomycetales;f__Bifidobacteriaceae;g__Bifidobacterium;s__Bifidobacterium adolescentis	SRS1846745	SRP094805	China	ftp://ftp.ebi.ac.uk/pub/databases/metagenomics/mgnify_genomes/human-gut/v1.0/all_genomes/MGYG-HGUT-023/MGYG-HGUT-02395/genomes3/GUT_GENOME249587.gff.gz	1
GUT_GENOME148573_02761	GUT_GENOME148573_02761	CCC80442.1	De-rhamnosylation	16	523	6	507	513	41.52	2.59e-140	424	97	4050395	106	65150	42.92	98.1	1.9	GUT_GENOME000004	d__Bacteria;p__Firmicutes_A;c__Clostridia;o__Lachnospirales;f__Lachnospiraceae;g__Blautia_A;s__Blautia_A sp900066165	NA	NA	China	ftp://ftp.ebi.ac.uk/pub/databases/metagenomics/mgnify_genomes/human-gut/v1.0/all_genomes/MGYG-HGUT-000/MGYG-HGUT-00002/genomes1/GUT_GENOME148573.gff.gz	1
GUT_GENOME162301_00267	GUT_GENOME162301_00267	KEF28001.1	O-deglycosylation	1	587	1	587	587	97.445	0	1174	75	1744142	377	5515	59.56	83.52	3.57	GUT_GENOME142522	d__Bacteria;p__Actinobacteriota;c__Actinobacteria;o__Actinomycetales;f__Bifidobacteriaceae;g__Bifidobacterium;s__Bifidobacterium adolescentis	SRS1876548	SRP095580	Netherlands	ftp://ftp.ebi.ac.uk/pub/databases/metagenomics/mgnify_genomes/human-gut/v1.0/all_genomes/MGYG-HGUT-023/MGYG-HGUT-02395/genomes2/GUT_GENOME162301.gff.gz	1
GUT_GENOME219927_00090	GUT_GENOME219927_00090	KEF28001.1	O-deglycosylation	1	780	1	780	780	97.436	0	1564	100	1767984	276	9744	60.34	94.44	4.25	GUT_GENOME142522	d__Bacteria;p__Actinobacteriota;c__Actinobacteria;o__Actinomycetales;f__Bifidobacteriaceae;g__Bifidobacterium;s__Bifidobacterium adolescentis	SRS1596774	SRP080787	China	ftp://ftp.ebi.ac.uk/pub/databases/metagenomics/mgnify_genomes/human-gut/v1.0/all_genomes/MGYG-HGUT-023/MGYG-HGUT-02395/genomes4/GUT_GENOME219927.gff.gz	1
GUT_GENOME223530_01009	GUT_GENOME223530_01009	KEF28001.1	O-deglycosylation	1	780	1	780	780	97.436	0	1564	100	2083502	149	31539	59.24	92.84	2.52	GUT_GENOME142522	d__Bacteria;p__Actinobacteriota;c__Actinobacteria;o__Actinomycetales;f__Bifidobacteriaceae;g__Bifidobacterium;s__Bifidobacterium adolescentis	SRS1719350	SRP090628	Russia	ftp://ftp.ebi.ac.uk/pub/databases/metagenomics/mgnify_genomes/human-gut/v1.0/all_genomes/MGYG-HGUT-023/MGYG-HGUT-02395/genomes1/GUT_GENOME223530.gff.gz	1
GUT_GENOME151250_00212	GUT_GENOME151250_00212	ANI69962.1	O-demethylation	2	257	1	255	257	40.078	5.06e-56	203	94	2295143	496	5575	44.06	50.88	0	GUT_GENOME000004	d__Bacteria;p__Firmicutes_A;c__Clostridia;o__Lachnospirales;f__Lachnospiraceae;g__Blautia_A;s__Blautia_A sp900066165	NA	NA	China	ftp://ftp.ebi.ac.uk/pub/databases/metagenomics/mgnify_genomes/human-gut/v1.0/all_genomes/MGYG-HGUT-000/MGYG-HGUT-00002/genomes1/GUT_GENOME151250.gff.gz	1
GUT_GENOME241899_01202	GUT_GENOME241899_01202	KEF28001.1	O-deglycosylation	1	780	1	780	780	97.436	0	1561	100	1807682	217	12315	59.96	95.12	2.33	GUT_GENOME142522	d__Bacteria;p__Actinobacteriota;c__Actinobacteria;o__Actinomycetales;f__Bifidobacteriaceae;g__Bifidobacterium;s__Bifidobacterium adolescentis	SRS1735686	SRP090628	Finland	ftp://ftp.ebi.ac.uk/pub/databases/metagenomics/mgnify_genomes/human-gut/v1.0/all_genomes/MGYG-HGUT-023/MGYG-HGUT-02395/genomes1/GUT_GENOME241899.gff.gz	1
GUT_GENOME153003_00771	GUT_GENOME153003_00771	CCC80442.1	De-rhamnosylation	89	523	1	436	440	45.455	7.7e-134	404	83	2554381	788	3365	43.3	50.65	0	GUT_GENOME000004	d__Bacteria;p__Firmicutes_A;c__Clostridia;o__Lachnospirales;f__Lachnospiraceae;g__Blautia_A;s__Blautia_A sp900066165	SRS295027	SRP008047	China	ftp://ftp.ebi.ac.uk/pub/databases/metagenomics/mgnify_genomes/human-gut/v1.0/all_genomes/MGYG-HGUT-000/MGYG-HGUT-00002/genomes1/GUT_GENOME153003.gff.gz	1
GUT_GENOME218034_00424	GUT_GENOME218034_00424	KEF28001.1	O-deglycosylation	41	780	1	740	740	97.432	0	1483	95	2124624	379	9037	60.42	97.11	3.52	GUT_GENOME142522	d__Bacteria;p__Actinobacteriota;c__Actinobacteria;o__Actinomycetales;f__Bifidobacteriaceae;g__Bifidobacterium;s__Bifidobacterium adolescentis	SRS1170705	SRP066479	Peru	ftp://ftp.ebi.ac.uk/pub/databases/metagenomics/mgnify_genomes/human-gut/v1.0/all_genomes/MGYG-HGUT-023/MGYG-HGUT-02395/genomes2/GUT_GENOME218034.gff.gz	1
GUT_GENOME171967_01429	GUT_GENOME171967_01429	KEF28001.1	O-deglycosylation	50	780	1	731	731	97.401	0	1465	94	1831547	289	7958	59.97	90.33	3.31	GUT_GENOME142522	d__Bacteria;p__Actinobacteriota;c__Actinobacteria;o__Actinomycetales;f__Bifidobacteriaceae;g__Bifidobacterium;s__Bifidobacterium adolescentis	SRS872032	SRP056054	Estonia	ftp://ftp.ebi.ac.uk/pub/databases/metagenomics/mgnify_genomes/human-gut/v1.0/all_genomes/MGYG-HGUT-023/MGYG-HGUT-02395/genomes4/GUT_GENOME171967.gff.gz	1
GUT_GENOME113747_00718	GUT_GENOME113747_00718	KEF28010.1	O-deglycosylation	1	748	1	748	748	97.326	0	1504	100	1639710	315	6405	59.64	89.49	0.91	GUT_GENOME142522	d__Bacteria;p__Actinobacteriota;c__Actinobacteria;o__Actinomycetales;f__Bifidobacteriaceae;g__Bifidobacterium;s__Bifidobacterium adolescentis	ERS328984	ERP003612	Denmark	ftp://ftp.ebi.ac.uk/pub/databases/metagenomics/mgnify_genomes/human-gut/v1.0/all_genomes/MGYG-HGUT-023/MGYG-HGUT-02395/genomes4/GUT_GENOME113747.gff.gz	1
GUT_GENOME156783_01065	GUT_GENOME031520_01056	CCC80442.1	De-rhamnosylation	77	523	1	448	452	45.575	2.55e-139	419	85	2930520	252	17778	43.65	85.2	2.08	GUT_GENOME000004	d__Bacteria;p__Firmicutes_A;c__Clostridia;o__Lachnospirales;f__Lachnospiraceae;g__Blautia_A;s__Blautia_A sp900066165	ERS848742	ERP012177	China	ftp://ftp.ebi.ac.uk/pub/databases/metagenomics/mgnify_genomes/human-gut/v1.0/all_genomes/MGYG-HGUT-000/MGYG-HGUT-00002/genomes1/GUT_GENOME031520.gff.gz	6
GUT_GENOME125124_01244	GUT_GENOME125124_01244	KEF28010.1	O-deglycosylation	1	748	1	748	748	97.326	0	1509	100	1619103	224	10672	60.6	88.6	1.58	GUT_GENOME142522	d__Bacteria;p__Actinobacteriota;c__Actinobacteria;o__Actinomycetales;f__Bifidobacteriaceae;g__Bifidobacterium;s__Bifidobacterium adolescentis	ERS1138779	ERP015450	China	ftp://ftp.ebi.ac.uk/pub/databases/metagenomics/mgnify_genomes/human-gut/v1.0/all_genomes/MGYG-HGUT-023/MGYG-HGUT-02395/genomes4/GUT_GENOME125124.gff.gz	1
GUT_GENOME150348_00184	GUT_GENOME150348_00184	KEF28010.1	O-deglycosylation	1	748	1	748	748	97.326	0	1508	100	1860747	332	7663	59.39	91.92	1.62	GUT_GENOME142522	d__Bacteria;p__Actinobacteriota;c__Actinobacteria;o__Actinomycetales;f__Bifidobacteriaceae;g__Bifidobacterium;s__Bifidobacterium adolescentis	SRS259539	SRP008047	China	ftp://ftp.ebi.ac.uk/pub/databases/metagenomics/mgnify_genomes/human-gut/v1.0/all_genomes/MGYG-HGUT-023/MGYG-HGUT-02395/genomes4/GUT_GENOME150348.gff.gz	2
GUT_GENOME158807_01568	GUT_GENOME158807_01568	CCC80442.1	De-rhamnosylation	77	523	1	448	452	45.575	1.94e-138	417	85	4281037	428	15796	43.18	92.96	0.63	GUT_GENOME000004	d__Bacteria;p__Firmicutes_A;c__Clostridia;o__Lachnospirales;f__Lachnospiraceae;g__Blautia_A;s__Blautia_A sp900066165	ERS634952	ERP009131	Canada	ftp://ftp.ebi.ac.uk/pub/databases/metagenomics/mgnify_genomes/human-gut/v1.0/all_genomes/MGYG-HGUT-000/MGYG-HGUT-00002/genomes1/GUT_GENOME158807.gff.gz	1
GUT_GENOME007533_00022	GUT_GENOME007533_00022	KEF28001.1	O-deglycosylation	1	780	1	780	780	97.308	0	1560	100	2011794	159	21182	59.4	94.65	0.84	GUT_GENOME142522	d__Bacteria;p__Actinobacteriota;c__Actinobacteria;o__Actinomycetales;f__Bifidobacteriaceae;g__Bifidobacterium;s__Bifidobacterium adolescentis	ERS554202	ERP007090	Sweden	ftp://ftp.ebi.ac.uk/pub/databases/metagenomics/mgnify_genomes/human-gut/v1.0/all_genomes/MGYG-HGUT-023/MGYG-HGUT-02395/genomes2/GUT_GENOME007533.gff.gz	1
GUT_GENOME118720_00231	GUT_GENOME118720_00231	KEF28001.1	O-deglycosylation	1	780	1	780	780	97.308	0	1560	100	1677700	160	15770	58.99	70.18	0	GUT_GENOME142522	d__Bacteria;p__Actinobacteriota;c__Actinobacteria;o__Actinomycetales;f__Bifidobacteriaceae;g__Bifidobacterium;s__Bifidobacterium adolescentis	ERS396419	ERP004605	Spain	ftp://ftp.ebi.ac.uk/pub/databases/metagenomics/mgnify_genomes/human-gut/v1.0/all_genomes/MGYG-HGUT-023/MGYG-HGUT-02395/genomes3/GUT_GENOME118720.gff.gz	1
GUT_GENOME160449_01111	GUT_GENOME128122_00505	KEF28001.1	O-deglycosylation	1	780	1	780	780	97.308	0	1561	100	1759081	197	14388	60.15	96.86	0.66	GUT_GENOME142522	d__Bacteria;p__Actinobacteriota;c__Actinobacteria;o__Actinomycetales;f__Bifidobacteriaceae;g__Bifidobacterium;s__Bifidobacterium adolescentis	SRS1596813	SRP080787	Mongolia	ftp://ftp.ebi.ac.uk/pub/databases/metagenomics/mgnify_genomes/human-gut/v1.0/all_genomes/MGYG-HGUT-023/MGYG-HGUT-02395/genomes5/GUT_GENOME128122.gff.gz	2
GUT_GENOME161951_01394	GUT_GENOME161951_01394	KEF28001.1	O-deglycosylation	1	780	1	780	780	97.308	0	1559	100	1806933	220	12137	60.17	84.37	4.1	GUT_GENOME142522	d__Bacteria;p__Actinobacteriota;c__Actinobacteria;o__Actinomycetales;f__Bifidobacteriaceae;g__Bifidobacterium;s__Bifidobacterium adolescentis	SRS1876327	SRP095580	Netherlands	ftp://ftp.ebi.ac.uk/pub/databases/metagenomics/mgnify_genomes/human-gut/v1.0/all_genomes/MGYG-HGUT-023/MGYG-HGUT-02395/genomes1/GUT_GENOME161951.gff.gz	1
GUT_GENOME163510_00497	GUT_GENOME163510_00497	KEF28001.1	O-deglycosylation	1	780	1	780	780	97.308	0	1561	100	2050309	45	78209	59.21	97.41	0.23	GUT_GENOME142522	d__Bacteria;p__Actinobacteriota;c__Actinobacteria;o__Actinomycetales;f__Bifidobacteriaceae;g__Bifidobacterium;s__Bifidobacterium adolescentis	SRS1876694	SRP095580	Netherlands	ftp://ftp.ebi.ac.uk/pub/databases/metagenomics/mgnify_genomes/human-gut/v1.0/all_genomes/MGYG-HGUT-023/MGYG-HGUT-02395/genomes4/GUT_GENOME163510.gff.gz	1
GUT_GENOME160033_00578	GUT_GENOME089916_01681	ANI69962.1	O-demethylation	2	257	1	255	257	40.078	4.82e-56	203	94	3159548	810	5451	43.59	81.11	3.59	GUT_GENOME000004	d__Bacteria;p__Firmicutes_A;c__Clostridia;o__Lachnospirales;f__Lachnospiraceae;g__Blautia_A;s__Blautia_A sp900066165	ERS608593	ERP008729	Austria	ftp://ftp.ebi.ac.uk/pub/databases/metagenomics/mgnify_genomes/human-gut/v1.0/all_genomes/MGYG-HGUT-000/MGYG-HGUT-00002/genomes1/GUT_GENOME089916.gff.gz	3
GUT_GENOME160033_01494	GUT_GENOME160033_01494	CCC80442.1	De-rhamnosylation	69	524	25	481	460	43.043	2.38e-134	407	87	2860618	506	7178	43.91	84.38	3.38	GUT_GENOME000004	d__Bacteria;p__Firmicutes_A;c__Clostridia;o__Lachnospirales;f__Lachnospiraceae;g__Blautia_A;s__Blautia_A sp900066165	SRS1876537	SRP095580	Netherlands	ftp://ftp.ebi.ac.uk/pub/databases/metagenomics/mgnify_genomes/human-gut/v1.0/all_genomes/MGYG-HGUT-000/MGYG-HGUT-00002/genomes1/GUT_GENOME160033.gff.gz	1
GUT_GENOME160401_01981	GUT_GENOME162450_02083	ANI69961.1	O-demethylation	1	190	1	190	192	44.271	1.91e-46	161	90	3544698	708	6109	43.27	79.81	3.26	GUT_GENOME000004	d__Bacteria;p__Firmicutes_A;c__Clostridia;o__Lachnospirales;f__Lachnospiraceae;g__Blautia_A;s__Blautia_A sp900066165	SRS1876601	SRP095580	Netherlands	ftp://ftp.ebi.ac.uk/pub/databases/metagenomics/mgnify_genomes/human-gut/v1.0/all_genomes/MGYG-HGUT-000/MGYG-HGUT-00002/genomes1/GUT_GENOME162450.gff.gz	1
GUT_GENOME161944_01767	GUT_GENOME161944_01767	CCC80442.1	De-rhamnosylation	60	523	17	481	469	46.055	1.08e-146	439	88	3018248	901	3604	43.52	73.18	3.26	GUT_GENOME000004	d__Bacteria;p__Firmicutes_A;c__Clostridia;o__Lachnospirales;f__Lachnospiraceae;g__Blautia_A;s__Blautia_A sp900066165	SRS1876587	SRP095580	Netherlands	ftp://ftp.ebi.ac.uk/pub/databases/metagenomics/mgnify_genomes/human-gut/v1.0/all_genomes/MGYG-HGUT-000/MGYG-HGUT-00002/genomes1/GUT_GENOME161944.gff.gz	2
GUT_GENOME162662_01748	GUT_GENOME162662_01748	CCC80442.1	De-rhamnosylation	4	523	3	521	525	43.048	2.81e-150	449	99	2855289	621	5510	43.96	77.73	2.84	GUT_GENOME000004	d__Bacteria;p__Firmicutes_A;c__Clostridia;o__Lachnospirales;f__Lachnospiraceae;g__Blautia_A;s__Blautia_A sp900066165	SRS1876511	SRP095580	Netherlands	ftp://ftp.ebi.ac.uk/pub/databases/metagenomics/mgnify_genomes/human-gut/v1.0/all_genomes/MGYG-HGUT-000/MGYG-HGUT-00002/genomes1/GUT_GENOME162662.gff.gz	1
GUT_GENOME218417_00037	GUT_GENOME218417_00037	KEF28001.1	O-deglycosylation	1	780	1	780	780	97.308	0	1560	100	1923977	345	9532	59.97	95.29	4.01	GUT_GENOME142522	d__Bacteria;p__Actinobacteriota;c__Actinobacteria;o__Actinomycetales;f__Bifidobacteriaceae;g__Bifidobacterium;s__Bifidobacterium adolescentis	SRS1170769	SRP066479	El Salvador	ftp://ftp.ebi.ac.uk/pub/databases/metagenomics/mgnify_genomes/human-gut/v1.0/all_genomes/MGYG-HGUT-023/MGYG-HGUT-02395/genomes4/GUT_GENOME218417.gff.gz	1
GUT_GENOME218502_00913	GUT_GENOME218502_00913	KEF28001.1	O-deglycosylation	1	780	1	780	780	97.308	0	1560	100	2155607	376	9716	59.99	97.95	4.22	GUT_GENOME142522	d__Bacteria;p__Actinobacteriota;c__Actinobacteria;o__Actinomycetales;f__Bifidobacteriaceae;g__Bifidobacterium;s__Bifidobacterium adolescentis	SRS1170781	SRP066479	El Salvador	ftp://ftp.ebi.ac.uk/pub/databases/metagenomics/mgnify_genomes/human-gut/v1.0/all_genomes/MGYG-HGUT-023/MGYG-HGUT-02395/genomes3/GUT_GENOME218502.gff.gz	1
GUT_GENOME218518_00660	GUT_GENOME218518_00660	KEF28001.1	O-deglycosylation	1	780	1	780	780	97.308	0	1560	100	1332214	273	5151	60.12	63.92	0.23	GUT_GENOME142522	d__Bacteria;p__Actinobacteriota;c__Actinobacteria;o__Actinomycetales;f__Bifidobacteriaceae;g__Bifidobacterium;s__Bifidobacterium adolescentis	SRS1170784	SRP066479	El Salvador	ftp://ftp.ebi.ac.uk/pub/databases/metagenomics/mgnify_genomes/human-gut/v1.0/all_genomes/MGYG-HGUT-023/MGYG-HGUT-02395/genomes5/GUT_GENOME218518.gff.gz	1
GUT_GENOME163223_01005	GUT_GENOME111949_00716	ANI69962.1	O-demethylation	2	257	1	255	257	40.078	5.81e-56	203	94	2825945	193	23817	43.86	84.81	2.85	GUT_GENOME000004	d__Bacteria;p__Firmicutes_A;c__Clostridia;o__Lachnospirales;f__Lachnospiraceae;g__Blautia_A;s__Blautia_A sp900066165	ERS328933	ERP003612	Denmark	ftp://ftp.ebi.ac.uk/pub/databases/metagenomics/mgnify_genomes/human-gut/v1.0/all_genomes/MGYG-HGUT-000/MGYG-HGUT-00002/genomes1/GUT_GENOME111949.gff.gz	2
GUT_GENOME218530_00079	GUT_GENOME218530_00079	KEF28001.1	O-deglycosylation	1	780	1	780	780	97.308	0	1560	100	2025962	361	7184	59.65	92.91	3.41	GUT_GENOME142522	d__Bacteria;p__Actinobacteriota;c__Actinobacteria;o__Actinomycetales;f__Bifidobacteriaceae;g__Bifidobacterium;s__Bifidobacterium adolescentis	SRS1170796	SRP066479	El Salvador	ftp://ftp.ebi.ac.uk/pub/databases/metagenomics/mgnify_genomes/human-gut/v1.0/all_genomes/MGYG-HGUT-023/MGYG-HGUT-02395/genomes3/GUT_GENOME218530.gff.gz	1
GUT_GENOME163232_00951	GUT_GENOME094001_01709	BBG22493.1	C-deglyc (PUE)	1	367	1	367	367	83.651	0	613	100	3784612	314	18767	43.03	92.59	3.59	GUT_GENOME000004	d__Bacteria;p__Firmicutes_A;c__Clostridia;o__Lachnospirales;f__Lachnospiraceae;g__Blautia_A;s__Blautia_A sp900066165	ERS608537	ERP008729	Austria	ftp://ftp.ebi.ac.uk/pub/databases/metagenomics/mgnify_genomes/human-gut/v1.0/all_genomes/MGYG-HGUT-000/MGYG-HGUT-00002/genomes1/GUT_GENOME094001.gff.gz	1
GUT_GENOME218787_01184	GUT_GENOME218787_01184	KEF28001.1	O-deglycosylation	1	780	1	780	780	97.308	0	1560	100	1971410	102	40250	60.07	95.77	0.53	GUT_GENOME142522	d__Bacteria;p__Actinobacteriota;c__Actinobacteria;o__Actinomycetales;f__Bifidobacteriaceae;g__Bifidobacterium;s__Bifidobacterium adolescentis	SRS1170868	SRP066479	El Salvador	ftp://ftp.ebi.ac.uk/pub/databases/metagenomics/mgnify_genomes/human-gut/v1.0/all_genomes/MGYG-HGUT-023/MGYG-HGUT-02395/genomes1/GUT_GENOME218787.gff.gz	1
GUT_GENOME163911_00313	GUT_GENOME104765_01459	CCC80440.1	De-rhamnosylation	9	627	6	672	667	42.879	0	584	95	2756582	554	6253	43.53	78.66	4.75	GUT_GENOME000004	d__Bacteria;p__Firmicutes_A;c__Clostridia;o__Lachnospirales;f__Lachnospiraceae;g__Blautia_A;s__Blautia_A sp900066165	ERS235504	ERP002469	Sweden	ftp://ftp.ebi.ac.uk/pub/databases/metagenomics/mgnify_genomes/human-gut/v1.0/all_genomes/MGYG-HGUT-000/MGYG-HGUT-00002/genomes1/GUT_GENOME104765.gff.gz	2
GUT_GENOME218796_00931	GUT_GENOME218796_00931	KEF28001.1	O-deglycosylation	1	780	1	780	780	97.308	0	1560	100	2150011	27	188844	59.31	99.09	0.55	GUT_GENOME142522	d__Bacteria;p__Actinobacteriota;c__Actinobacteria;o__Actinomycetales;f__Bifidobacteriaceae;g__Bifidobacterium;s__Bifidobacterium adolescentis	SRS1170903	SRP066479	El Salvador	ftp://ftp.ebi.ac.uk/pub/databases/metagenomics/mgnify_genomes/human-gut/v1.0/all_genomes/MGYG-HGUT-023/MGYG-HGUT-02395/genomes1/GUT_GENOME218796.gff.gz	1
GUT_GENOME220921_00425	GUT_GENOME220921_00425	KEF28001.1	O-deglycosylation	1	780	1	780	780	97.308	0	1561	100	1893718	276	11897	59.85	95.74	3.05	GUT_GENOME142522	d__Bacteria;p__Actinobacteriota;c__Actinobacteria;o__Actinomycetales;f__Bifidobacteriaceae;g__Bifidobacterium;s__Bifidobacterium adolescentis	SRS1596813	SRP080787	Mongolia	ftp://ftp.ebi.ac.uk/pub/databases/metagenomics/mgnify_genomes/human-gut/v1.0/all_genomes/MGYG-HGUT-023/MGYG-HGUT-02395/genomes2/GUT_GENOME220921.gff.gz	1
GUT_GENOME163911_00930	GUT_GENOME163911_00930	CCC80442.1	De-rhamnosylation	4	523	3	521	525	43.238	1.78e-151	452	99	2051596	210	13268	44.05	57.15	0.21	GUT_GENOME000004	d__Bacteria;p__Firmicutes_A;c__Clostridia;o__Lachnospirales;f__Lachnospiraceae;g__Blautia_A;s__Blautia_A sp900066165	SRS1876320	SRP095580	Netherlands	ftp://ftp.ebi.ac.uk/pub/databases/metagenomics/mgnify_genomes/human-gut/v1.0/all_genomes/MGYG-HGUT-000/MGYG-HGUT-00002/genomes1/GUT_GENOME163911.gff.gz	1
GUT_GENOME163911_01593	GUT_GENOME163911_01593	ANI69962.1	O-demethylation	2	257	1	255	257	40.078	4.82e-56	203	94	2051596	210	13268	44.05	57.15	0.21	GUT_GENOME000004	d__Bacteria;p__Firmicutes_A;c__Clostridia;o__Lachnospirales;f__Lachnospiraceae;g__Blautia_A;s__Blautia_A sp900066165	SRS1876320	SRP095580	Netherlands	ftp://ftp.ebi.ac.uk/pub/databases/metagenomics/mgnify_genomes/human-gut/v1.0/all_genomes/MGYG-HGUT-000/MGYG-HGUT-00002/genomes1/GUT_GENOME163911.gff.gz	1
GUT_GENOME164626_00976	GUT_GENOME003146_02075	BBG22493.1	C-deglyc (PUE)	1	367	1	357	367	54.768	3.58e-136	401	100	2568923	522	6266	44.01	80.44	1.74	GUT_GENOME000004	d__Bacteria;p__Firmicutes_A;c__Clostridia;o__Lachnospirales;f__Lachnospiraceae;g__Blautia_A;s__Blautia_A sp900066165	ERS473106	ERP005989	Sweden	ftp://ftp.ebi.ac.uk/pub/databases/metagenomics/mgnify_genomes/human-gut/v1.0/all_genomes/MGYG-HGUT-000/MGYG-HGUT-00002/genomes1/GUT_GENOME003146.gff.gz	1
GUT_GENOME265869_00882	GUT_GENOME265869_00882	KEF28001.1	O-deglycosylation	1	780	1	780	780	97.308	0	1561	100	1182466	36	56723	60.13	55.28	0.23	GUT_GENOME142522	d__Bacteria;p__Actinobacteriota;c__Actinobacteria;o__Actinomycetales;f__Bifidobacteriaceae;g__Bifidobacterium;s__Bifidobacterium adolescentis	ERS971765	ERP012929	Israel	ftp://ftp.ebi.ac.uk/pub/databases/metagenomics/mgnify_genomes/human-gut/v1.0/all_genomes/MGYG-HGUT-023/MGYG-HGUT-02395/genomes4/GUT_GENOME265869.gff.gz	1
GUT_GENOME167702_01411	GUT_GENOME167702_01411	CCC80442.1	De-rhamnosylation	4	523	3	521	525	43.048	2.81e-150	449	99	3693052	212	27533	43.04	96.71	4.6	GUT_GENOME000004	d__Bacteria;p__Firmicutes_A;c__Clostridia;o__Lachnospirales;f__Lachnospiraceae;g__Blautia_A;s__Blautia_A sp900066165	SRS591939	SRP040956	Denmark	ftp://ftp.ebi.ac.uk/pub/databases/metagenomics/mgnify_genomes/human-gut/v1.0/all_genomes/MGYG-HGUT-000/MGYG-HGUT-00002/genomes1/GUT_GENOME167702.gff.gz	1
GUT_GENOME118639_00584	GUT_GENOME118639_00584	KEF28001.1	O-deglycosylation	40	780	1	741	741	97.301	0	1484	95	1253468	349	3836	60.15	63.15	0.3	GUT_GENOME142522	d__Bacteria;p__Actinobacteriota;c__Actinobacteria;o__Actinomycetales;f__Bifidobacteriaceae;g__Bifidobacterium;s__Bifidobacterium adolescentis	ERS396415	ERP004605	Spain	ftp://ftp.ebi.ac.uk/pub/databases/metagenomics/mgnify_genomes/human-gut/v1.0/all_genomes/MGYG-HGUT-023/MGYG-HGUT-02395/genomes2/GUT_GENOME118639.gff.gz	1
GUT_GENOME197249_00246	GUT_GENOME197249_00246	KEF28001.1	O-deglycosylation	41	780	1	740	740	97.297	0	1481	95	1157015	282	4478	59.77	60.53	1.75	GUT_GENOME142522	d__Bacteria;p__Actinobacteriota;c__Actinobacteria;o__Actinomycetales;f__Bifidobacteriaceae;g__Bifidobacterium;s__Bifidobacterium adolescentis	SRS1876536	SRP095580	Netherlands	ftp://ftp.ebi.ac.uk/pub/databases/metagenomics/mgnify_genomes/human-gut/v1.0/all_genomes/MGYG-HGUT-023/MGYG-HGUT-02395/genomes4/GUT_GENOME197249.gff.gz	1
GUT_GENOME223725_00478	GUT_GENOME182828_00700	KEF28001.1	O-deglycosylation	170	780	1	611	611	97.218	0	1219	78	1718433	270	8043	59.54	81.98	2.31	GUT_GENOME142522	d__Bacteria;p__Actinobacteriota;c__Actinobacteria;o__Actinomycetales;f__Bifidobacteriaceae;g__Bifidobacterium;s__Bifidobacterium adolescentis	SRS1719416	SRP090628	Russia	ftp://ftp.ebi.ac.uk/pub/databases/metagenomics/mgnify_genomes/human-gut/v1.0/all_genomes/MGYG-HGUT-023/MGYG-HGUT-02395/genomes1/GUT_GENOME182828.gff.gz	2
GUT_GENOME129371_01540	GUT_GENOME129371_01540	KEF28010.1	O-deglycosylation	143	748	1	606	606	97.195	0	1214	81	1869531	248	11227	60.1	92.5	3.26	GUT_GENOME142522	d__Bacteria;p__Actinobacteriota;c__Actinobacteria;o__Actinomycetales;f__Bifidobacteriaceae;g__Bifidobacterium;s__Bifidobacterium adolescentis	SRS1596865	SRP080787	Mongolia	ftp://ftp.ebi.ac.uk/pub/databases/metagenomics/mgnify_genomes/human-gut/v1.0/all_genomes/MGYG-HGUT-023/MGYG-HGUT-02395/genomes5/GUT_GENOME129371.gff.gz	1
GUT_GENOME167715_01667	GUT_GENOME167715_01667	CCC80442.1	De-rhamnosylation	4	523	3	521	525	43.048	2.81e-150	449	99	4785734	326	24224	42.14	96.29	3.67	GUT_GENOME000004	d__Bacteria;p__Firmicutes_A;c__Clostridia;o__Lachnospirales;f__Lachnospiraceae;g__Blautia_A;s__Blautia_A sp900066165	SRS591939	SRP040956	Denmark	ftp://ftp.ebi.ac.uk/pub/databases/metagenomics/mgnify_genomes/human-gut/v1.0/all_genomes/MGYG-HGUT-000/MGYG-HGUT-00002/genomes1/GUT_GENOME167715.gff.gz	1
GUT_GENOME112215_01563	GUT_GENOME112215_01563	KEF28010.1	O-deglycosylation	1	748	1	748	748	97.193	0	1502	100	2161935	68	54234	59.34	99.84	0	GUT_GENOME142522	d__Bacteria;p__Actinobacteriota;c__Actinobacteria;o__Actinomycetales;f__Bifidobacteriaceae;g__Bifidobacterium;s__Bifidobacterium adolescentis	ERS328942	ERP003612	Denmark	ftp://ftp.ebi.ac.uk/pub/databases/metagenomics/mgnify_genomes/human-gut/v1.0/all_genomes/MGYG-HGUT-023/MGYG-HGUT-02395/genomes2/GUT_GENOME112215.gff.gz	1
GUT_GENOME168414_01583	GUT_GENOME073081_00604	CCC80440.1	De-rhamnosylation	7	652	4	654	651	44.7	0	599	99	3069040	238	25057	43.64	79.87	0.63	GUT_GENOME000004	d__Bacteria;p__Firmicutes_A;c__Clostridia;o__Lachnospirales;f__Lachnospiraceae;g__Blautia_A;s__Blautia_A sp900066165	ERS396455	ERP004605	Spain	ftp://ftp.ebi.ac.uk/pub/databases/metagenomics/mgnify_genomes/human-gut/v1.0/all_genomes/MGYG-HGUT-000/MGYG-HGUT-00002/genomes1/GUT_GENOME073081.gff.gz	1
GUT_GENOME227034_00310	GUT_GENOME227034_00310	KEF28010.1	O-deglycosylation	1	748	1	748	748	97.193	0	1504	100	2077934	447	6638	59.16	91.32	2.79	GUT_GENOME142522	d__Bacteria;p__Actinobacteriota;c__Actinobacteria;o__Actinomycetales;f__Bifidobacteriaceae;g__Bifidobacterium;s__Bifidobacterium adolescentis	SRS259539	SRP008047	China	ftp://ftp.ebi.ac.uk/pub/databases/metagenomics/mgnify_genomes/human-gut/v1.0/all_genomes/MGYG-HGUT-023/MGYG-HGUT-02395/genomes1/GUT_GENOME227034.gff.gz	1
GUT_GENOME170187_02139	GUT_GENOME170187_02139	CCC80442.1	De-rhamnosylation	4	523	3	521	525	43.238	1.69e-151	453	99	3240695	409	10418	43.4	83.62	3.4	GUT_GENOME000004	d__Bacteria;p__Firmicutes_A;c__Clostridia;o__Lachnospirales;f__Lachnospiraceae;g__Blautia_A;s__Blautia_A sp900066165	SRS820593	SRP052307	United States	ftp://ftp.ebi.ac.uk/pub/databases/metagenomics/mgnify_genomes/human-gut/v1.0/all_genomes/MGYG-HGUT-000/MGYG-HGUT-00002/genomes1/GUT_GENOME170187.gff.gz	1
GUT_GENOME259202_00229	GUT_GENOME259202_00229	KEF28010.1	O-deglycosylation	1	748	1	748	748	97.193	0	1503	100	1160229	10	142133	59	55.98	0	GUT_GENOME142522	d__Bacteria;p__Actinobacteriota;c__Actinobacteria;o__Actinomycetales;f__Bifidobacteriaceae;g__Bifidobacterium;s__Bifidobacterium adolescentis	ERS746814	ERP010700	United Kingdom	ftp://ftp.ebi.ac.uk/pub/databases/metagenomics/mgnify_genomes/human-gut/v1.0/all_genomes/MGYG-HGUT-023/MGYG-HGUT-02395/genomes4/GUT_GENOME259202.gff.gz	1
GUT_GENOME005128_00330	GUT_GENOME005128_00330	KEF28001.1	O-deglycosylation	1	780	1	780	780	97.179	0	1558	100	1844953	181	14722	59.9	94.14	1.68	GUT_GENOME142522	d__Bacteria;p__Actinobacteriota;c__Actinobacteria;o__Actinomycetales;f__Bifidobacteriaceae;g__Bifidobacterium;s__Bifidobacterium adolescentis	ERS473254	ERP005989	Sweden	ftp://ftp.ebi.ac.uk/pub/databases/metagenomics/mgnify_genomes/human-gut/v1.0/all_genomes/MGYG-HGUT-023/MGYG-HGUT-02395/genomes5/GUT_GENOME005128.gff.gz	1
GUT_GENOME173070_01181	GUT_GENOME173070_01181	CCC80442.1	De-rhamnosylation	4	523	3	521	525	43.238	1.78e-151	452	99	2462340	96	35853	43.66	75.32	1.48	GUT_GENOME000004	d__Bacteria;p__Firmicutes_A;c__Clostridia;o__Lachnospirales;f__Lachnospiraceae;g__Blautia_A;s__Blautia_A sp900066165	SRS935445	SRP058320	United States	ftp://ftp.ebi.ac.uk/pub/databases/metagenomics/mgnify_genomes/human-gut/v1.0/all_genomes/MGYG-HGUT-000/MGYG-HGUT-00002/genomes1/GUT_GENOME173070.gff.gz	1
GUT_GENOME024715_00249	GUT_GENOME024715_00249	KEF28001.1	O-deglycosylation	1	780	1	780	780	97.179	0	1558	100	1509143	381	4531	59.63	72.35	2.3	GUT_GENOME142522	d__Bacteria;p__Actinobacteriota;c__Actinobacteria;o__Actinomycetales;f__Bifidobacteriaceae;g__Bifidobacterium;s__Bifidobacterium adolescentis	ERS1444555	ERP019502	Kazakhstan	ftp://ftp.ebi.ac.uk/pub/databases/metagenomics/mgnify_genomes/human-gut/v1.0/all_genomes/MGYG-HGUT-023/MGYG-HGUT-02395/genomes2/GUT_GENOME024715.gff.gz	1
GUT_GENOME174842_02729	GUT_GENOME174842_02729	CCC80442.1	De-rhamnosylation	4	523	3	521	527	43.264	4.48e-151	452	99	3412918	225	25203	43.12	84.8	3.16	GUT_GENOME000004	d__Bacteria;p__Firmicutes_A;c__Clostridia;o__Lachnospirales;f__Lachnospiraceae;g__Blautia_A;s__Blautia_A sp900066165	SRS1135768	SRP065270	United States	ftp://ftp.ebi.ac.uk/pub/databases/metagenomics/mgnify_genomes/human-gut/v1.0/all_genomes/MGYG-HGUT-000/MGYG-HGUT-00002/genomes1/GUT_GENOME174842.gff.gz	1
GUT_GENOME174866_00090	GUT_GENOME174866_00090	CCC80442.1	De-rhamnosylation	16	524	6	509	514	41.634	3.34e-135	411	97	3316282	248	18715	43.38	95.2	0.29	GUT_GENOME000004	d__Bacteria;p__Firmicutes_A;c__Clostridia;o__Lachnospirales;f__Lachnospiraceae;g__Blautia_A;s__Blautia_A sp900066165	SRS1158739	SRP066053	United States	ftp://ftp.ebi.ac.uk/pub/databases/metagenomics/mgnify_genomes/human-gut/v1.0/all_genomes/MGYG-HGUT-000/MGYG-HGUT-00002/genomes1/GUT_GENOME174866.gff.gz	1
GUT_GENOME174866_00278	GUT_GENOME174866_00278	CCC80442.1	De-rhamnosylation	4	523	3	521	525	43.238	9.69e-152	453	99	3316282	248	18715	43.38	95.2	0.29	GUT_GENOME000004	d__Bacteria;p__Firmicutes_A;c__Clostridia;o__Lachnospirales;f__Lachnospiraceae;g__Blautia_A;s__Blautia_A sp900066165	SRS1158739	SRP066053	United States	ftp://ftp.ebi.ac.uk/pub/databases/metagenomics/mgnify_genomes/human-gut/v1.0/all_genomes/MGYG-HGUT-000/MGYG-HGUT-00002/genomes1/GUT_GENOME174866.gff.gz	1
GUT_GENOME055207_00361	GUT_GENOME055207_00361	KEF28001.1	O-deglycosylation	1	780	1	780	780	97.179	0	1559	100	1828085	203	12553	59.68	91.52	3.35	GUT_GENOME142522	d__Bacteria;p__Actinobacteriota;c__Actinobacteria;o__Actinomycetales;f__Bifidobacteriaceae;g__Bifidobacterium;s__Bifidobacterium adolescentis	ERS396293	ERP004605	Denmark	ftp://ftp.ebi.ac.uk/pub/databases/metagenomics/mgnify_genomes/human-gut/v1.0/all_genomes/MGYG-HGUT-023/MGYG-HGUT-02395/genomes4/GUT_GENOME055207.gff.gz	1
GUT_GENOME174918_01625	GUT_GENOME060362_01679	QBM20340.1	De-rhamnosylation	1	828	1	836	853	42.556	0	637	99	2937180	184	26305	43.45	74.09	1.9	GUT_GENOME000004	d__Bacteria;p__Firmicutes_A;c__Clostridia;o__Lachnospirales;f__Lachnospiraceae;g__Blautia_A;s__Blautia_A sp900066165	ERS473202	ERP005989	Denmark	ftp://ftp.ebi.ac.uk/pub/databases/metagenomics/mgnify_genomes/human-gut/v1.0/all_genomes/MGYG-HGUT-000/MGYG-HGUT-00002/genomes1/GUT_GENOME060362.gff.gz	3
GUT_GENOME056185_00971	GUT_GENOME056185_00971	KEF28001.1	O-deglycosylation	1	780	1	780	780	97.179	0	1558	100	1952544	183	15721	59.52	93.41	3.37	GUT_GENOME142522	d__Bacteria;p__Actinobacteriota;c__Actinobacteria;o__Actinomycetales;f__Bifidobacteriaceae;g__Bifidobacterium;s__Bifidobacterium adolescentis	ERS396362	ERP004605	Denmark	ftp://ftp.ebi.ac.uk/pub/databases/metagenomics/mgnify_genomes/human-gut/v1.0/all_genomes/MGYG-HGUT-023/MGYG-HGUT-02395/genomes4/GUT_GENOME056185.gff.gz	1
GUT_GENOME175062_00946	GUT_GENOME175062_00946	CCC80442.1	De-rhamnosylation	4	523	3	521	525	43.238	9.69e-152	453	99	4052440	224	31774	42.91	94.76	3.8	GUT_GENOME000004	d__Bacteria;p__Firmicutes_A;c__Clostridia;o__Lachnospirales;f__Lachnospiraceae;g__Blautia_A;s__Blautia_A sp900066165	SRS1158730	SRP066053	United States	ftp://ftp.ebi.ac.uk/pub/databases/metagenomics/mgnify_genomes/human-gut/v1.0/all_genomes/MGYG-HGUT-000/MGYG-HGUT-00002/genomes1/GUT_GENOME175062.gff.gz	1
GUT_GENOME175062_01768	GUT_GENOME175062_01768	ANI69962.1	O-demethylation	2	257	1	255	257	40.078	5.37e-56	203	94	4052440	224	31774	42.91	94.76	3.8	GUT_GENOME000004	d__Bacteria;p__Firmicutes_A;c__Clostridia;o__Lachnospirales;f__Lachnospiraceae;g__Blautia_A;s__Blautia_A sp900066165	SRS1158730	SRP066053	United States	ftp://ftp.ebi.ac.uk/pub/databases/metagenomics/mgnify_genomes/human-gut/v1.0/all_genomes/MGYG-HGUT-000/MGYG-HGUT-00002/genomes1/GUT_GENOME175062.gff.gz	1
GUT_GENOME061035_00833	GUT_GENOME061035_00833	KEF28001.1	O-deglycosylation	1	780	1	780	780	97.179	0	1558	100	1941031	144	22587	59.71	90.01	1.86	GUT_GENOME142522	d__Bacteria;p__Actinobacteriota;c__Actinobacteria;o__Actinomycetales;f__Bifidobacteriaceae;g__Bifidobacterium;s__Bifidobacterium adolescentis	ERS473254	ERP005989	Denmark	ftp://ftp.ebi.ac.uk/pub/databases/metagenomics/mgnify_genomes/human-gut/v1.0/all_genomes/MGYG-HGUT-023/MGYG-HGUT-02395/genomes1/GUT_GENOME061035.gff.gz	1
GUT_GENOME177563_01409	GUT_GENOME177563_01409	CCC80442.1	De-rhamnosylation	4	523	3	521	525	43.238	9.69e-152	453	99	1988996	55	66770	43.49	53.8	0	GUT_GENOME000004	d__Bacteria;p__Firmicutes_A;c__Clostridia;o__Lachnospirales;f__Lachnospiraceae;g__Blautia_A;s__Blautia_A sp900066165	SRS1283436	SRP069867	United States	ftp://ftp.ebi.ac.uk/pub/databases/metagenomics/mgnify_genomes/human-gut/v1.0/all_genomes/MGYG-HGUT-000/MGYG-HGUT-00002/genomes1/GUT_GENOME177563.gff.gz	1
GUT_GENOME078462_00960	GUT_GENOME078462_00960	KEF28001.1	O-deglycosylation	1	780	1	780	780	97.179	0	1558	100	2006269	252	16054	59.74	97.71	2.39	GUT_GENOME142522	d__Bacteria;p__Actinobacteriota;c__Actinobacteria;o__Actinomycetales;f__Bifidobacteriaceae;g__Bifidobacterium;s__Bifidobacterium adolescentis	ERS473254	ERP005989	Sweden	ftp://ftp.ebi.ac.uk/pub/databases/metagenomics/mgnify_genomes/human-gut/v1.0/all_genomes/MGYG-HGUT-023/MGYG-HGUT-02395/genomes2/GUT_GENOME078462.gff.gz	1
GUT_GENOME179608_00636	GUT_GENOME167702_01246	QBM20342.1	De-rhamnosylation	1	887	1	887	895	54.749	0	1016	99	3693052	212	27533	43.04	96.71	4.6	GUT_GENOME000004	d__Bacteria;p__Firmicutes_A;c__Clostridia;o__Lachnospirales;f__Lachnospiraceae;g__Blautia_A;s__Blautia_A sp900066165	SRS591939	SRP040956	Denmark	ftp://ftp.ebi.ac.uk/pub/databases/metagenomics/mgnify_genomes/human-gut/v1.0/all_genomes/MGYG-HGUT-000/MGYG-HGUT-00002/genomes1/GUT_GENOME167702.gff.gz	4
GUT_GENOME179608_00681	GUT_GENOME179608_00681	ANI69962.1	O-demethylation	2	257	1	255	257	40.078	5.37e-56	203	94	3302171	460	9957	43.33	87	4.01	GUT_GENOME000004	d__Bacteria;p__Firmicutes_A;c__Clostridia;o__Lachnospirales;f__Lachnospiraceae;g__Blautia_A;s__Blautia_A sp900066165	SRS1483393	SRP076119	United States	ftp://ftp.ebi.ac.uk/pub/databases/metagenomics/mgnify_genomes/human-gut/v1.0/all_genomes/MGYG-HGUT-000/MGYG-HGUT-00002/genomes1/GUT_GENOME179608.gff.gz	1
GUT_GENOME087785_00823	GUT_GENOME087785_00823	KEF28001.1	O-deglycosylation	1	780	1	780	780	97.179	0	1558	100	1951379	168	17525	59.75	95.71	3.23	GUT_GENOME142522	d__Bacteria;p__Actinobacteriota;c__Actinobacteria;o__Actinomycetales;f__Bifidobacteriaceae;g__Bifidobacterium;s__Bifidobacterium adolescentis	ERS608508	ERP008729	Austria	ftp://ftp.ebi.ac.uk/pub/databases/metagenomics/mgnify_genomes/human-gut/v1.0/all_genomes/MGYG-HGUT-023/MGYG-HGUT-02395/genomes2/GUT_GENOME087785.gff.gz	1
GUT_GENOME182248_01704	GUT_GENOME182248_01704	ANI69962.1	O-demethylation	2	257	1	255	257	40.078	5.06e-56	203	94	2519173	399	7611	44.36	71.73	2.91	GUT_GENOME000004	d__Bacteria;p__Firmicutes_A;c__Clostridia;o__Lachnospirales;f__Lachnospiraceae;g__Blautia_A;s__Blautia_A sp900066165	SRS1719222	SRP090628	Finland	ftp://ftp.ebi.ac.uk/pub/databases/metagenomics/mgnify_genomes/human-gut/v1.0/all_genomes/MGYG-HGUT-000/MGYG-HGUT-00002/genomes1/GUT_GENOME182248.gff.gz	1
GUT_GENOME091052_00551	GUT_GENOME091052_00551	KEF28001.1	O-deglycosylation	1	780	1	780	780	97.179	0	1558	100	1295664	55	43999	59.54	71.97	0	GUT_GENOME142522	d__Bacteria;p__Actinobacteriota;c__Actinobacteria;o__Actinomycetales;f__Bifidobacteriaceae;g__Bifidobacterium;s__Bifidobacterium adolescentis	ERS608508	ERP008729	Austria	ftp://ftp.ebi.ac.uk/pub/databases/metagenomics/mgnify_genomes/human-gut/v1.0/all_genomes/MGYG-HGUT-023/MGYG-HGUT-02395/genomes4/GUT_GENOME091052.gff.gz	1
GUT_GENOME091940_01183	GUT_GENOME091940_01183	KEF28001.1	O-deglycosylation	1	780	1	780	780	97.179	0	1558	100	1960569	126	26673	59.75	92.12	1.82	GUT_GENOME142522	d__Bacteria;p__Actinobacteriota;c__Actinobacteria;o__Actinomycetales;f__Bifidobacteriaceae;g__Bifidobacterium;s__Bifidobacterium adolescentis	ERS608496	ERP008729	Austria	ftp://ftp.ebi.ac.uk/pub/databases/metagenomics/mgnify_genomes/human-gut/v1.0/all_genomes/MGYG-HGUT-023/MGYG-HGUT-02395/genomes2/GUT_GENOME091940.gff.gz	1
GUT_GENOME184126_01997	GUT_GENOME184126_01997	CCC80442.1	De-rhamnosylation	4	523	3	521	525	43.238	1.78e-151	452	99	3634346	548	8690	42.81	93.77	2.85	GUT_GENOME000004	d__Bacteria;p__Firmicutes_A;c__Clostridia;o__Lachnospirales;f__Lachnospiraceae;g__Blautia_A;s__Blautia_A sp900066165	SRS1735564	SRP090628	Finland	ftp://ftp.ebi.ac.uk/pub/databases/metagenomics/mgnify_genomes/human-gut/v1.0/all_genomes/MGYG-HGUT-000/MGYG-HGUT-00002/genomes1/GUT_GENOME184126.gff.gz	1
GUT_GENOME186234_00265	GUT_GENOME186234_00265	CCC80442.1	De-rhamnosylation	4	523	3	521	525	42.857	2.44e-149	447	99	3804454	193	35697	43.03	96.01	4.01	GUT_GENOME000004	d__Bacteria;p__Firmicutes_A;c__Clostridia;o__Lachnospirales;f__Lachnospiraceae;g__Blautia_A;s__Blautia_A sp900066165	SRS1767352	SRP091570	United States	ftp://ftp.ebi.ac.uk/pub/databases/metagenomics/mgnify_genomes/human-gut/v1.0/all_genomes/MGYG-HGUT-000/MGYG-HGUT-00002/genomes1/GUT_GENOME186234.gff.gz	8
GUT_GENOME095898_00823	GUT_GENOME095898_00823	KEF28001.1	O-deglycosylation	1	780	1	780	780	97.179	0	1561	100	2006886	76	42079	59.4	94.24	0.55	GUT_GENOME142522	d__Bacteria;p__Actinobacteriota;c__Actinobacteria;o__Actinomycetales;f__Bifidobacteriaceae;g__Bifidobacterium;s__Bifidobacterium adolescentis	NA	NA	Italy	ftp://ftp.ebi.ac.uk/pub/databases/metagenomics/mgnify_genomes/human-gut/v1.0/all_genomes/MGYG-HGUT-023/MGYG-HGUT-02395/genomes5/GUT_GENOME095898.gff.gz	7
GUT_GENOME108103_00348	GUT_GENOME108103_00348	KEF28001.1	O-deglycosylation	1	780	1	780	780	97.179	0	1558	100	1820432	276	8272	59.35	86.87	0.87	GUT_GENOME142522	d__Bacteria;p__Actinobacteriota;c__Actinobacteria;o__Actinomycetales;f__Bifidobacteriaceae;g__Bifidobacterium;s__Bifidobacterium adolescentis	ERS328755	ERP003612	Denmark	ftp://ftp.ebi.ac.uk/pub/databases/metagenomics/mgnify_genomes/human-gut/v1.0/all_genomes/MGYG-HGUT-023/MGYG-HGUT-02395/genomes5/GUT_GENOME108103.gff.gz	1
GUT_GENOME116908_00585	GUT_GENOME116908_00585	KEF28001.1	O-deglycosylation	1	780	1	780	780	97.179	0	1558	100	1948812	180	17062	59.52	95.4	3.11	GUT_GENOME142522	d__Bacteria;p__Actinobacteriota;c__Actinobacteria;o__Actinomycetales;f__Bifidobacteriaceae;g__Bifidobacterium;s__Bifidobacterium adolescentis	ERS396362	ERP004605	Denmark	ftp://ftp.ebi.ac.uk/pub/databases/metagenomics/mgnify_genomes/human-gut/v1.0/all_genomes/MGYG-HGUT-023/MGYG-HGUT-02395/genomes3/GUT_GENOME116908.gff.gz	1
GUT_GENOME186563_01556	GUT_GENOME186563_01556	CCC80442.1	De-rhamnosylation	4	523	3	521	525	42.857	2e-149	447	99	3041415	395	9466	43.39	60.87	1.75	GUT_GENOME000004	d__Bacteria;p__Firmicutes_A;c__Clostridia;o__Lachnospirales;f__Lachnospiraceae;g__Blautia_A;s__Blautia_A sp900066165	SRS1771179	SRP091570	United States	ftp://ftp.ebi.ac.uk/pub/databases/metagenomics/mgnify_genomes/human-gut/v1.0/all_genomes/MGYG-HGUT-000/MGYG-HGUT-00002/genomes1/GUT_GENOME186563.gff.gz	6
GUT_GENOME128604_01453	GUT_GENOME003594_00124	KEF28001.1	O-deglycosylation	1	780	1	780	780	97.179	0	1559	100	1598385	325	6264	59.27	75.26	3.69	GUT_GENOME142522	d__Bacteria;p__Actinobacteriota;c__Actinobacteria;o__Actinomycetales;f__Bifidobacteriaceae;g__Bifidobacterium;s__Bifidobacterium adolescentis	ERS473145	ERP005989	Sweden	ftp://ftp.ebi.ac.uk/pub/databases/metagenomics/mgnify_genomes/human-gut/v1.0/all_genomes/MGYG-HGUT-023/MGYG-HGUT-02395/genomes3/GUT_GENOME003594.gff.gz	134
GUT_GENOME129257_01160	GUT_GENOME129257_01160	KEF28001.1	O-deglycosylation	1	780	1	780	780	97.179	0	1558	100	1708014	154	18125	60.14	93.27	0.41	GUT_GENOME142522	d__Bacteria;p__Actinobacteriota;c__Actinobacteria;o__Actinomycetales;f__Bifidobacteriaceae;g__Bifidobacterium;s__Bifidobacterium adolescentis	SRS1596860	SRP080787	Mongolia	ftp://ftp.ebi.ac.uk/pub/databases/metagenomics/mgnify_genomes/human-gut/v1.0/all_genomes/MGYG-HGUT-023/MGYG-HGUT-02395/genomes4/GUT_GENOME129257.gff.gz	1
GUT_GENOME161999_00366	GUT_GENOME161999_00366	KEF28001.1	O-deglycosylation	1	780	1	780	780	97.179	0	1560	100	1806738	197	14124	59.46	87.9	1.24	GUT_GENOME142522	d__Bacteria;p__Actinobacteriota;c__Actinobacteria;o__Actinomycetales;f__Bifidobacteriaceae;g__Bifidobacterium;s__Bifidobacterium adolescentis	SRS1876288	SRP095580	Netherlands	ftp://ftp.ebi.ac.uk/pub/databases/metagenomics/mgnify_genomes/human-gut/v1.0/all_genomes/MGYG-HGUT-023/MGYG-HGUT-02395/genomes2/GUT_GENOME161999.gff.gz	1
GUT_GENOME186771_01992	GUT_GENOME186771_01992	CCC80442.1	De-rhamnosylation	16	524	15	521	511	47.75	4.14e-164	484	97	4039662	171	44193	42.78	93.02	3.86	GUT_GENOME000004	d__Bacteria;p__Firmicutes_A;c__Clostridia;o__Lachnospirales;f__Lachnospiraceae;g__Blautia_A;s__Blautia_A sp900066165	SRS1767346	SRP091570	United States	ftp://ftp.ebi.ac.uk/pub/databases/metagenomics/mgnify_genomes/human-gut/v1.0/all_genomes/MGYG-HGUT-000/MGYG-HGUT-00002/genomes1/GUT_GENOME186771.gff.gz	1
GUT_GENOME164495_01382	GUT_GENOME164495_01382	KEF28001.1	O-deglycosylation	1	780	1	780	780	97.179	0	1558	100	1867634	151	22054	59.91	95.27	0.83	GUT_GENOME142522	d__Bacteria;p__Actinobacteriota;c__Actinobacteria;o__Actinomycetales;f__Bifidobacteriaceae;g__Bifidobacterium;s__Bifidobacterium adolescentis	SRS576105	SRP040146	United States	ftp://ftp.ebi.ac.uk/pub/databases/metagenomics/mgnify_genomes/human-gut/v1.0/all_genomes/MGYG-HGUT-023/MGYG-HGUT-02395/genomes3/GUT_GENOME164495.gff.gz	1
GUT_GENOME180991_00467	GUT_GENOME180991_00467	KEF28001.1	O-deglycosylation	1	780	1	780	780	97.179	0	1559	100	1610512	237	8234	59.98	86.29	2.5	GUT_GENOME142522	d__Bacteria;p__Actinobacteriota;c__Actinobacteria;o__Actinomycetales;f__Bifidobacteriaceae;g__Bifidobacterium;s__Bifidobacterium adolescentis	SRS1596801	SRP080787	Mongolia	ftp://ftp.ebi.ac.uk/pub/databases/metagenomics/mgnify_genomes/human-gut/v1.0/all_genomes/MGYG-HGUT-023/MGYG-HGUT-02395/genomes5/GUT_GENOME180991.gff.gz	1
GUT_GENOME181223_01441	GUT_GENOME181223_01441	KEF28001.1	O-deglycosylation	1	780	1	780	780	97.179	0	1558	100	1936571	114	25601	60.01	97.7	0.5	GUT_GENOME142522	d__Bacteria;p__Actinobacteriota;c__Actinobacteria;o__Actinomycetales;f__Bifidobacteriaceae;g__Bifidobacterium;s__Bifidobacterium adolescentis	SRS1596819	SRP080787	Mongolia	ftp://ftp.ebi.ac.uk/pub/databases/metagenomics/mgnify_genomes/human-gut/v1.0/all_genomes/MGYG-HGUT-023/MGYG-HGUT-02395/genomes2/GUT_GENOME181223.gff.gz	1
GUT_GENOME182537_00282	GUT_GENOME182537_00282	KEF28001.1	O-deglycosylation	1	780	1	780	780	97.179	0	1558	100	1498984	315	5154	59.12	71.53	0.55	GUT_GENOME142522	d__Bacteria;p__Actinobacteriota;c__Actinobacteria;o__Actinomycetales;f__Bifidobacteriaceae;g__Bifidobacterium;s__Bifidobacterium adolescentis	SRS1719312	SRP090628	Russia	ftp://ftp.ebi.ac.uk/pub/databases/metagenomics/mgnify_genomes/human-gut/v1.0/all_genomes/MGYG-HGUT-023/MGYG-HGUT-02395/genomes2/GUT_GENOME182537.gff.gz	1
GUT_GENOME183479_00224	GUT_GENOME183479_00224	KEF28001.1	O-deglycosylation	1	780	1	780	780	97.179	0	1561	100	1043152	46	37189	59.2	55.3	0.24	GUT_GENOME142522	d__Bacteria;p__Actinobacteriota;c__Actinobacteria;o__Actinomycetales;f__Bifidobacteriaceae;g__Bifidobacterium;s__Bifidobacterium adolescentis	SRS1719578	SRP090628	Russia	ftp://ftp.ebi.ac.uk/pub/databases/metagenomics/mgnify_genomes/human-gut/v1.0/all_genomes/MGYG-HGUT-023/MGYG-HGUT-02395/genomes4/GUT_GENOME183479.gff.gz	1
GUT_GENOME184104_01068	GUT_GENOME184104_01068	KEF28001.1	O-deglycosylation	1	780	1	780	780	97.179	0	1558	100	1740102	45	82446	59.31	91.67	0.45	GUT_GENOME142522	d__Bacteria;p__Actinobacteriota;c__Actinobacteria;o__Actinomycetales;f__Bifidobacteriaceae;g__Bifidobacterium;s__Bifidobacterium adolescentis	SRS1735560	SRP090628	Estonia	ftp://ftp.ebi.ac.uk/pub/databases/metagenomics/mgnify_genomes/human-gut/v1.0/all_genomes/MGYG-HGUT-023/MGYG-HGUT-02395/genomes4/GUT_GENOME184104.gff.gz	1
GUT_GENOME196954_01325	GUT_GENOME196954_01325	KEF28001.1	O-deglycosylation	1	780	1	780	780	97.179	0	1558	100	1760438	110	24350	59.91	84.58	3.03	GUT_GENOME142522	d__Bacteria;p__Actinobacteriota;c__Actinobacteria;o__Actinomycetales;f__Bifidobacteriaceae;g__Bifidobacterium;s__Bifidobacterium adolescentis	SRS1876464	SRP095580	Netherlands	ftp://ftp.ebi.ac.uk/pub/databases/metagenomics/mgnify_genomes/human-gut/v1.0/all_genomes/MGYG-HGUT-023/MGYG-HGUT-02395/genomes5/GUT_GENOME196954.gff.gz	1
GUT_GENOME218385_00937	GUT_GENOME218385_00937	KEF28001.1	O-deglycosylation	1	780	1	780	780	97.179	0	1558	100	2073044	62	103635	59.81	94.97	3.39	GUT_GENOME142522	d__Bacteria;p__Actinobacteriota;c__Actinobacteria;o__Actinomycetales;f__Bifidobacteriaceae;g__Bifidobacterium;s__Bifidobacterium adolescentis	SRS1170766	SRP066479	El Salvador	ftp://ftp.ebi.ac.uk/pub/databases/metagenomics/mgnify_genomes/human-gut/v1.0/all_genomes/MGYG-HGUT-023/MGYG-HGUT-02395/genomes4/GUT_GENOME218385.gff.gz	1
GUT_GENOME187314_02267	GUT_GENOME187314_02267	QBM20340.1	De-rhamnosylation	2	828	1	830	844	43.009	0	662	99	3990994	198	34417	43.26	94.23	3.58	GUT_GENOME000004	d__Bacteria;p__Firmicutes_A;c__Clostridia;o__Lachnospirales;f__Lachnospiraceae;g__Blautia_A;s__Blautia_A sp900066165	SRS1771200	SRP091570	United States	ftp://ftp.ebi.ac.uk/pub/databases/metagenomics/mgnify_genomes/human-gut/v1.0/all_genomes/MGYG-HGUT-000/MGYG-HGUT-00002/genomes1/GUT_GENOME187314.gff.gz	1
GUT_GENOME218407_01524	GUT_GENOME218407_01524	KEF28001.1	O-deglycosylation	1	780	1	780	780	97.179	0	1558	100	2197792	149	36908	59.68	100	0.91	GUT_GENOME142522	d__Bacteria;p__Actinobacteriota;c__Actinobacteria;o__Actinomycetales;f__Bifidobacteriaceae;g__Bifidobacterium;s__Bifidobacterium adolescentis	SRS1170768	SRP066479	El Salvador	ftp://ftp.ebi.ac.uk/pub/databases/metagenomics/mgnify_genomes/human-gut/v1.0/all_genomes/MGYG-HGUT-023/MGYG-HGUT-02395/genomes1/GUT_GENOME218407.gff.gz	1
GUT_GENOME218407_01537	GUT_GENOME218407_01537	KEF28001.1	O-deglycosylation	1	780	1	780	780	97.179	0	1558	100	2197792	149	36908	59.68	100	0.91	GUT_GENOME142522	d__Bacteria;p__Actinobacteriota;c__Actinobacteria;o__Actinomycetales;f__Bifidobacteriaceae;g__Bifidobacterium;s__Bifidobacterium adolescentis	SRS1170768	SRP066479	El Salvador	ftp://ftp.ebi.ac.uk/pub/databases/metagenomics/mgnify_genomes/human-gut/v1.0/all_genomes/MGYG-HGUT-023/MGYG-HGUT-02395/genomes1/GUT_GENOME218407.gff.gz	1
GUT_GENOME188057_01352	GUT_GENOME191628_02157	BBG22493.1	C-deglyc (PUE)	1	367	1	369	369	67.209	0	526	100	2771935	369	9496	43.41	76.51	2.85	GUT_GENOME000004	d__Bacteria;p__Firmicutes_A;c__Clostridia;o__Lachnospirales;f__Lachnospiraceae;g__Blautia_A;s__Blautia_A sp900066165	SRS1820396	SRP093965	United States	ftp://ftp.ebi.ac.uk/pub/databases/metagenomics/mgnify_genomes/human-gut/v1.0/all_genomes/MGYG-HGUT-000/MGYG-HGUT-00002/genomes1/GUT_GENOME191628.gff.gz	1
GUT_GENOME218492_01572	GUT_GENOME218492_01572	KEF28001.1	O-deglycosylation	1	780	1	780	780	97.179	0	1558	100	1987834	111	29113	59.81	98.88	1.93	GUT_GENOME142522	d__Bacteria;p__Actinobacteriota;c__Actinobacteria;o__Actinomycetales;f__Bifidobacteriaceae;g__Bifidobacterium;s__Bifidobacterium adolescentis	SRS1170779	SRP066479	El Salvador	ftp://ftp.ebi.ac.uk/pub/databases/metagenomics/mgnify_genomes/human-gut/v1.0/all_genomes/MGYG-HGUT-023/MGYG-HGUT-02395/genomes1/GUT_GENOME218492.gff.gz	1
GUT_GENOME218602_01570	GUT_GENOME218602_01570	KEF28001.1	O-deglycosylation	1	780	1	780	780	97.179	0	1557	100	1857489	608	3756	59.86	87.04	2.52	GUT_GENOME142522	d__Bacteria;p__Actinobacteriota;c__Actinobacteria;o__Actinomycetales;f__Bifidobacteriaceae;g__Bifidobacterium;s__Bifidobacterium adolescentis	SRS1170819	SRP066479	El Salvador	ftp://ftp.ebi.ac.uk/pub/databases/metagenomics/mgnify_genomes/human-gut/v1.0/all_genomes/MGYG-HGUT-023/MGYG-HGUT-02395/genomes2/GUT_GENOME218602.gff.gz	1
GUT_GENOME223453_01388	GUT_GENOME223453_01388	KEF28001.1	O-deglycosylation	1	780	1	780	780	97.179	0	1558	100	2020489	437	6334	59.34	93.42	2.55	GUT_GENOME142522	d__Bacteria;p__Actinobacteriota;c__Actinobacteria;o__Actinomycetales;f__Bifidobacteriaceae;g__Bifidobacterium;s__Bifidobacterium adolescentis	SRS1719312	SRP090628	Russia	ftp://ftp.ebi.ac.uk/pub/databases/metagenomics/mgnify_genomes/human-gut/v1.0/all_genomes/MGYG-HGUT-023/MGYG-HGUT-02395/genomes3/GUT_GENOME223453.gff.gz	1
GUT_GENOME223457_00337	GUT_GENOME223457_00337	KEF28001.1	O-deglycosylation	1	780	1	780	780	97.179	0	1558	100	2117416	169	19521	59.48	98.29	1.86	GUT_GENOME142522	d__Bacteria;p__Actinobacteriota;c__Actinobacteria;o__Actinomycetales;f__Bifidobacteriaceae;g__Bifidobacterium;s__Bifidobacterium adolescentis	SRS1719313	SRP090628	Russia	ftp://ftp.ebi.ac.uk/pub/databases/metagenomics/mgnify_genomes/human-gut/v1.0/all_genomes/MGYG-HGUT-023/MGYG-HGUT-02395/genomes1/GUT_GENOME223457.gff.gz	1
GUT_GENOME224355_00862	GUT_GENOME224355_00862	KEF28001.1	O-deglycosylation	1	780	1	780	780	97.179	0	1559	100	2075480	37	148986	58.88	100	0.45	GUT_GENOME142522	d__Bacteria;p__Actinobacteriota;c__Actinobacteria;o__Actinomycetales;f__Bifidobacteriaceae;g__Bifidobacterium;s__Bifidobacterium adolescentis	SRS1719567	SRP090628	Russia	ftp://ftp.ebi.ac.uk/pub/databases/metagenomics/mgnify_genomes/human-gut/v1.0/all_genomes/MGYG-HGUT-023/MGYG-HGUT-02395/genomes1/GUT_GENOME224355.gff.gz	1
GUT_GENOME041541_01155	GUT_GENOME032166_02966	AAO76887.1	O-deglycosylation	1	950	5	954	950	99.895	0	1978	100	5315678	421	18926	42.52	53.28	0	GUT_GENOME001120	d__Bacteria;p__Bacteroidota;c__Bacteroidia;o__Bacteroidales;f__Bacteroidaceae;g__Bacteroides;s__Bacteroides thetaiotaomicron	ERS1015639	ERP013562	China	ftp://ftp.ebi.ac.uk/pub/databases/metagenomics/mgnify_genomes/human-gut/v1.0/all_genomes/MGYG-HGUT-001/MGYG-HGUT-00196/genomes1/GUT_GENOME032166.gff.gz	16
GUT_GENOME189293_00897	GUT_GENOME189293_00897	CCC80442.1	De-rhamnosylation	4	523	3	521	525	42.857	1.92e-148	445	99	3669483	210	26226	42.97	92.42	3.16	GUT_GENOME000004	d__Bacteria;p__Firmicutes_A;c__Clostridia;o__Lachnospirales;f__Lachnospiraceae;g__Blautia_A;s__Blautia_A sp900066165	SRS1820252	SRP093965	United States	ftp://ftp.ebi.ac.uk/pub/databases/metagenomics/mgnify_genomes/human-gut/v1.0/all_genomes/MGYG-HGUT-000/MGYG-HGUT-00002/genomes1/GUT_GENOME189293.gff.gz	3
GUT_GENOME136450_02946	GUT_GENOME052326_02361	AAO76887.1	O-deglycosylation	1	950	5	954	950	99.895	0	1977	100	4315104	769	6477	43.95	67.24	0	GUT_GENOME001120	d__Bacteria;p__Bacteroidota;c__Bacteroidia;o__Bacteroidales;f__Bacteroidaceae;g__Bacteroides;s__Bacteroides thetaiotaomicron	ERS199280	ERP002061	Spain	ftp://ftp.ebi.ac.uk/pub/databases/metagenomics/mgnify_genomes/human-gut/v1.0/all_genomes/MGYG-HGUT-001/MGYG-HGUT-00196/genomes1/GUT_GENOME052326.gff.gz	10
GUT_GENOME140060_04360	GUT_GENOME140060_04360	AAO76887.1	O-deglycosylation	1	950	5	954	950	99.895	0	1979	100	6376818	240	58901	42.91	97.51	0.08	GUT_GENOME001120	d__Bacteria;p__Bacteroidota;c__Bacteroidia;o__Bacteroidales;f__Bacteroidaceae;g__Bacteroides;s__Bacteroides thetaiotaomicron	SAMN09736686	PRJNA482748	China	ftp://ftp.ebi.ac.uk/pub/databases/metagenomics/mgnify_genomes/human-gut/v1.0/all_genomes/MGYG-HGUT-001/MGYG-HGUT-00196/genomes2/GUT_GENOME140060.gff.gz	1
GUT_GENOME156263_02638	GUT_GENOME156263_02638	AAO76887.1	O-deglycosylation	1	950	5	954	950	99.895	0	1980	100	5609224	81	122552	42.75	73.62	0	GUT_GENOME001120	d__Bacteria;p__Bacteroidota;c__Bacteroidia;o__Bacteroidales;f__Bacteroidaceae;g__Bacteroides;s__Bacteroides thetaiotaomicron	ERS475338	ERP005860	China	ftp://ftp.ebi.ac.uk/pub/databases/metagenomics/mgnify_genomes/human-gut/v1.0/all_genomes/MGYG-HGUT-001/MGYG-HGUT-00196/genomes1/GUT_GENOME156263.gff.gz	1
GUT_GENOME156736_02317	GUT_GENOME156736_02317	AAO76887.1	O-deglycosylation	1	950	5	954	950	99.895	0	1980	100	5530954	388	22255	42.97	64.29	0	GUT_GENOME001120	d__Bacteria;p__Bacteroidota;c__Bacteroidia;o__Bacteroidales;f__Bacteroidaceae;g__Bacteroides;s__Bacteroides thetaiotaomicron	ERS475367	ERP005860	China	ftp://ftp.ebi.ac.uk/pub/databases/metagenomics/mgnify_genomes/human-gut/v1.0/all_genomes/MGYG-HGUT-001/MGYG-HGUT-00196/genomes1/GUT_GENOME156736.gff.gz	1
GUT_GENOME177997_01391	GUT_GENOME177997_01391	AAO76887.1	O-deglycosylation	1	950	5	954	950	99.895	0	1979	100	4669662	182	35973	43.27	67.41	1.72	GUT_GENOME001120	d__Bacteria;p__Bacteroidota;c__Bacteroidia;o__Bacteroidales;f__Bacteroidaceae;g__Bacteroides;s__Bacteroides thetaiotaomicron	SRS259495	SRP008047	China	ftp://ftp.ebi.ac.uk/pub/databases/metagenomics/mgnify_genomes/human-gut/v1.0/all_genomes/MGYG-HGUT-001/MGYG-HGUT-00196/genomes1/GUT_GENOME177997.gff.gz	1
GUT_GENOME189856_00670	GUT_GENOME162450_00518	CCC80442.1	De-rhamnosylation	4	523	3	521	525	42.857	9.07e-149	446	99	3544698	708	6109	43.27	79.81	3.26	GUT_GENOME000004	d__Bacteria;p__Firmicutes_A;c__Clostridia;o__Lachnospirales;f__Lachnospiraceae;g__Blautia_A;s__Blautia_A sp900066165	SRS1876601	SRP095580	Netherlands	ftp://ftp.ebi.ac.uk/pub/databases/metagenomics/mgnify_genomes/human-gut/v1.0/all_genomes/MGYG-HGUT-000/MGYG-HGUT-00002/genomes1/GUT_GENOME162450.gff.gz	2
GUT_GENOME199692_02885	GUT_GENOME017287_03020	AAO76887.1	O-deglycosylation	1	950	5	954	950	99.895	0	1976	100	6297163	111	99273	42.69	76.72	0	GUT_GENOME001120	d__Bacteria;p__Bacteroidota;c__Bacteroidia;o__Bacteroidales;f__Bacteroidaceae;g__Bacteroides;s__Bacteroides thetaiotaomicron	SRS1997007	SRP100575	China	ftp://ftp.ebi.ac.uk/pub/databases/metagenomics/mgnify_genomes/human-gut/v1.0/all_genomes/MGYG-HGUT-001/MGYG-HGUT-00196/genomes1/GUT_GENOME017287.gff.gz	3
GUT_GENOME209861_02023	GUT_GENOME209861_02023	AAO76887.1	O-deglycosylation	1	950	5	954	950	99.895	0	1979	100	5355083	409	19881	43.4	77.59	3.45	GUT_GENOME001120	d__Bacteria;p__Bacteroidota;c__Bacteroidia;o__Bacteroidales;f__Bacteroidaceae;g__Bacteroides;s__Bacteroides thetaiotaomicron	SRS1905674	SRP096283	United States	ftp://ftp.ebi.ac.uk/pub/databases/metagenomics/mgnify_genomes/human-gut/v1.0/all_genomes/MGYG-HGUT-001/MGYG-HGUT-00196/genomes2/GUT_GENOME209861.gff.gz	1
GUT_GENOME247125_02786	GUT_GENOME247125_02786	AAO76887.1	O-deglycosylation	1	950	5	954	950	99.895	0	1980	100	5758075	155	62474	42.79	96.87	0.24	GUT_GENOME001120	d__Bacteria;p__Bacteroidota;c__Bacteroidia;o__Bacteroidales;f__Bacteroidaceae;g__Bacteroides;s__Bacteroides thetaiotaomicron	ERS1066640	ERP013933	United States	ftp://ftp.ebi.ac.uk/pub/databases/metagenomics/mgnify_genomes/human-gut/v1.0/all_genomes/MGYG-HGUT-001/MGYG-HGUT-00196/genomes2/GUT_GENOME247125.gff.gz	1
GUT_GENOME189941_01339	GUT_GENOME189941_01339	ANI69962.1	O-demethylation	2	257	1	255	257	40.078	1.06e-55	202	94	2761206	208	19609	43.78	86.96	2.11	GUT_GENOME000004	d__Bacteria;p__Firmicutes_A;c__Clostridia;o__Lachnospirales;f__Lachnospiraceae;g__Blautia_A;s__Blautia_A sp900066165	SRS1820291	SRP093965	United States	ftp://ftp.ebi.ac.uk/pub/databases/metagenomics/mgnify_genomes/human-gut/v1.0/all_genomes/MGYG-HGUT-000/MGYG-HGUT-00002/genomes1/GUT_GENOME189941.gff.gz	1
GUT_GENOME189941_01674	GUT_GENOME087311_00028	CCC80442.1	De-rhamnosylation	4	523	3	521	525	42.857	2.12e-149	447	99	1953430	245	14706	44.85	61.39	0.95	GUT_GENOME000004	d__Bacteria;p__Firmicutes_A;c__Clostridia;o__Lachnospirales;f__Lachnospiraceae;g__Blautia_A;s__Blautia_A sp900066165	ERS608490	ERP008729	Austria	ftp://ftp.ebi.ac.uk/pub/databases/metagenomics/mgnify_genomes/human-gut/v1.0/all_genomes/MGYG-HGUT-000/MGYG-HGUT-00002/genomes1/GUT_GENOME087311.gff.gz	12
GUT_GENOME189992_00448	GUT_GENOME091015_01062	CCC80442.1	De-rhamnosylation	4	523	3	521	525	42.857	3.89e-150	449	99	2598032	517	6652	44.21	60	0	GUT_GENOME000004	d__Bacteria;p__Firmicutes_A;c__Clostridia;o__Lachnospirales;f__Lachnospiraceae;g__Blautia_A;s__Blautia_A sp900066165	ERS608554	ERP008729	Austria	ftp://ftp.ebi.ac.uk/pub/databases/metagenomics/mgnify_genomes/human-gut/v1.0/all_genomes/MGYG-HGUT-000/MGYG-HGUT-00002/genomes1/GUT_GENOME091015.gff.gz	4
GUT_GENOME189992_00576	GUT_GENOME189992_00576	CCC80440.1	De-rhamnosylation	9	624	6	630	625	44.96	0	585	94	2590088	137	26359	43.93	79.12	1.67	GUT_GENOME000004	d__Bacteria;p__Firmicutes_A;c__Clostridia;o__Lachnospirales;f__Lachnospiraceae;g__Blautia_A;s__Blautia_A sp900066165	SRS1820301	SRP093965	United States	ftp://ftp.ebi.ac.uk/pub/databases/metagenomics/mgnify_genomes/human-gut/v1.0/all_genomes/MGYG-HGUT-000/MGYG-HGUT-00002/genomes1/GUT_GENOME189992.gff.gz	1
GUT_GENOME224385_01347	GUT_GENOME224385_01347	KEF28001.1	O-deglycosylation	1	780	1	780	780	97.179	0	1561	100	2022866	93	37272	59.3	90.56	2.55	GUT_GENOME142522	d__Bacteria;p__Actinobacteriota;c__Actinobacteria;o__Actinomycetales;f__Bifidobacteriaceae;g__Bifidobacterium;s__Bifidobacterium adolescentis	SRS1719578	SRP090628	Russia	ftp://ftp.ebi.ac.uk/pub/databases/metagenomics/mgnify_genomes/human-gut/v1.0/all_genomes/MGYG-HGUT-023/MGYG-HGUT-02395/genomes5/GUT_GENOME224385.gff.gz	1
GUT_GENOME224985_00063	GUT_GENOME224985_00063	KEF28001.1	O-deglycosylation	1	780	1	780	780	97.179	0	1558	100	1963208	105	28065	59.57	97.5	1.11	GUT_GENOME142522	d__Bacteria;p__Actinobacteriota;c__Actinobacteria;o__Actinomycetales;f__Bifidobacteriaceae;g__Bifidobacterium;s__Bifidobacterium adolescentis	SRS1735555	SRP090628	Estonia	ftp://ftp.ebi.ac.uk/pub/databases/metagenomics/mgnify_genomes/human-gut/v1.0/all_genomes/MGYG-HGUT-023/MGYG-HGUT-02395/genomes5/GUT_GENOME224985.gff.gz	1
GUT_GENOME189992_01743	GUT_GENOME189992_01743	ANI69962.1	O-demethylation	2	257	1	255	257	40.078	6.05e-56	203	94	2590088	137	26359	43.93	79.12	1.67	GUT_GENOME000004	d__Bacteria;p__Firmicutes_A;c__Clostridia;o__Lachnospirales;f__Lachnospiraceae;g__Blautia_A;s__Blautia_A sp900066165	SRS1820301	SRP093965	United States	ftp://ftp.ebi.ac.uk/pub/databases/metagenomics/mgnify_genomes/human-gut/v1.0/all_genomes/MGYG-HGUT-000/MGYG-HGUT-00002/genomes1/GUT_GENOME189992.gff.gz	1
GUT_GENOME225015_00137	GUT_GENOME225015_00137	KEF28001.1	O-deglycosylation	1	780	1	780	780	97.179	0	1558	100	2103055	76	45114	59.29	98.83	0.8	GUT_GENOME142522	d__Bacteria;p__Actinobacteriota;c__Actinobacteria;o__Actinomycetales;f__Bifidobacteriaceae;g__Bifidobacterium;s__Bifidobacterium adolescentis	SRS1735560	SRP090628	Estonia	ftp://ftp.ebi.ac.uk/pub/databases/metagenomics/mgnify_genomes/human-gut/v1.0/all_genomes/MGYG-HGUT-023/MGYG-HGUT-02395/genomes1/GUT_GENOME225015.gff.gz	1
GUT_GENOME190000_01639	GUT_GENOME190000_01639	CCC80442.1	De-rhamnosylation	4	523	3	521	525	42.857	1.5e-149	448	99	2222725	333	8093	43.55	73.68	4.63	GUT_GENOME000004	d__Bacteria;p__Firmicutes_A;c__Clostridia;o__Lachnospirales;f__Lachnospiraceae;g__Blautia_A;s__Blautia_A sp900066165	SRS1820302	SRP093965	United States	ftp://ftp.ebi.ac.uk/pub/databases/metagenomics/mgnify_genomes/human-gut/v1.0/all_genomes/MGYG-HGUT-000/MGYG-HGUT-00002/genomes1/GUT_GENOME190000.gff.gz	3
GUT_GENOME190097_00338	GUT_GENOME179608_01090	CCC80442.1	De-rhamnosylation	4	523	3	521	525	42.857	1.69e-149	447	99	3302171	460	9957	43.33	87	4.01	GUT_GENOME000004	d__Bacteria;p__Firmicutes_A;c__Clostridia;o__Lachnospirales;f__Lachnospiraceae;g__Blautia_A;s__Blautia_A sp900066165	SRS1483393	SRP076119	United States	ftp://ftp.ebi.ac.uk/pub/databases/metagenomics/mgnify_genomes/human-gut/v1.0/all_genomes/MGYG-HGUT-000/MGYG-HGUT-00002/genomes1/GUT_GENOME179608.gff.gz	2
GUT_GENOME190301_00906	GUT_GENOME190301_00906	CCC80442.1	De-rhamnosylation	4	523	3	521	525	42.857	7.97e-150	448	99	2787813	151	27799	43.54	72.09	1.27	GUT_GENOME000004	d__Bacteria;p__Firmicutes_A;c__Clostridia;o__Lachnospirales;f__Lachnospiraceae;g__Blautia_A;s__Blautia_A sp900066165	SRS1820220	SRP093965	United States	ftp://ftp.ebi.ac.uk/pub/databases/metagenomics/mgnify_genomes/human-gut/v1.0/all_genomes/MGYG-HGUT-000/MGYG-HGUT-00002/genomes1/GUT_GENOME190301.gff.gz	1
GUT_GENOME240058_01058	GUT_GENOME240058_01058	KEF28001.1	O-deglycosylation	1	780	1	780	780	97.179	0	1561	100	2002681	72	42085	59.64	98.2	0.24	GUT_GENOME142522	d__Bacteria;p__Actinobacteriota;c__Actinobacteria;o__Actinomycetales;f__Bifidobacteriaceae;g__Bifidobacterium;s__Bifidobacterium adolescentis	SRS1719578	SRP090628	Russia	ftp://ftp.ebi.ac.uk/pub/databases/metagenomics/mgnify_genomes/human-gut/v1.0/all_genomes/MGYG-HGUT-023/MGYG-HGUT-02395/genomes1/GUT_GENOME240058.gff.gz	1
GUT_GENOME240804_00303	GUT_GENOME240804_00303	KEF28001.1	O-deglycosylation	1	780	1	780	780	97.179	0	1558	100	1680882	395	4848	59.01	78.89	0.55	GUT_GENOME142522	d__Bacteria;p__Actinobacteriota;c__Actinobacteria;o__Actinomycetales;f__Bifidobacteriaceae;g__Bifidobacterium;s__Bifidobacterium adolescentis	SRS1719312	SRP090628	Russia	ftp://ftp.ebi.ac.uk/pub/databases/metagenomics/mgnify_genomes/human-gut/v1.0/all_genomes/MGYG-HGUT-023/MGYG-HGUT-02395/genomes5/GUT_GENOME240804.gff.gz	1
GUT_GENOME190613_01639	GUT_GENOME186234_01975	QBM20342.1	De-rhamnosylation	1	887	1	887	895	54.525	0	1015	99	3804454	193	35697	43.03	96.01	4.01	GUT_GENOME000004	d__Bacteria;p__Firmicutes_A;c__Clostridia;o__Lachnospirales;f__Lachnospiraceae;g__Blautia_A;s__Blautia_A sp900066165	SRS1767352	SRP091570	United States	ftp://ftp.ebi.ac.uk/pub/databases/metagenomics/mgnify_genomes/human-gut/v1.0/all_genomes/MGYG-HGUT-000/MGYG-HGUT-00002/genomes1/GUT_GENOME186234.gff.gz	6
GUT_GENOME240810_01428	GUT_GENOME240810_01428	KEF28001.1	O-deglycosylation	1	780	1	780	780	97.179	0	1558	100	2071384	168	17979	59.44	98.51	2.27	GUT_GENOME142522	d__Bacteria;p__Actinobacteriota;c__Actinobacteria;o__Actinomycetales;f__Bifidobacteriaceae;g__Bifidobacterium;s__Bifidobacterium adolescentis	SRS1719313	SRP090628	Russia	ftp://ftp.ebi.ac.uk/pub/databases/metagenomics/mgnify_genomes/human-gut/v1.0/all_genomes/MGYG-HGUT-023/MGYG-HGUT-02395/genomes1/GUT_GENOME240810.gff.gz	1
GUT_GENOME242632_00822	GUT_GENOME242632_00822	KEF28001.1	O-deglycosylation	1	780	1	780	780	97.179	0	1558	100	1431323	42	58497	58.99	72.12	0.45	GUT_GENOME142522	d__Bacteria;p__Actinobacteriota;c__Actinobacteria;o__Actinomycetales;f__Bifidobacteriaceae;g__Bifidobacterium;s__Bifidobacterium adolescentis	SRS1735560	SRP090628	Estonia	ftp://ftp.ebi.ac.uk/pub/databases/metagenomics/mgnify_genomes/human-gut/v1.0/all_genomes/MGYG-HGUT-023/MGYG-HGUT-02395/genomes1/GUT_GENOME242632.gff.gz	1
GUT_GENOME276851_01023	GUT_GENOME276851_01023	KEF28001.1	O-deglycosylation	1	780	1	780	780	97.179	0	1558	100	2090624	121	31272	59.69	98.86	1.45	GUT_GENOME142522	d__Bacteria;p__Actinobacteriota;c__Actinobacteria;o__Actinomycetales;f__Bifidobacteriaceae;g__Bifidobacterium;s__Bifidobacterium adolescentis	ERS972254	ERP012929	Israel	ftp://ftp.ebi.ac.uk/pub/databases/metagenomics/mgnify_genomes/human-gut/v1.0/all_genomes/MGYG-HGUT-023/MGYG-HGUT-02395/genomes5/GUT_GENOME276851.gff.gz	1
GUT_GENOME024268_00602	GUT_GENOME024268_00602	KEF28001.1	O-deglycosylation	144	780	1	637	637	97.174	0	1271	82	1040063	308	3599	60.09	59.56	1.35	GUT_GENOME142522	d__Bacteria;p__Actinobacteriota;c__Actinobacteria;o__Actinomycetales;f__Bifidobacteriaceae;g__Bifidobacterium;s__Bifidobacterium adolescentis	ERS1444541	ERP019502	Kazakhstan	ftp://ftp.ebi.ac.uk/pub/databases/metagenomics/mgnify_genomes/human-gut/v1.0/all_genomes/MGYG-HGUT-023/MGYG-HGUT-02395/genomes5/GUT_GENOME024268.gff.gz	9
GUT_GENOME190793_00529	GUT_GENOME190793_00529	CCC80442.1	De-rhamnosylation	4	523	3	521	525	42.857	1.05e-149	448	99	2899893	202	22919	43.74	88.39	4.59	GUT_GENOME000004	d__Bacteria;p__Firmicutes_A;c__Clostridia;o__Lachnospirales;f__Lachnospiraceae;g__Blautia_A;s__Blautia_A sp900066165	SRS1820232	SRP093965	United States	ftp://ftp.ebi.ac.uk/pub/databases/metagenomics/mgnify_genomes/human-gut/v1.0/all_genomes/MGYG-HGUT-000/MGYG-HGUT-00002/genomes1/GUT_GENOME190793.gff.gz	1
GUT_GENOME180316_01374	GUT_GENOME180316_01374	KEF28001.1	O-deglycosylation	1	691	1	691	691	97.106	0	1382	89	1852955	144	21481	59.69	84.42	3.42	GUT_GENOME142522	d__Bacteria;p__Actinobacteriota;c__Actinobacteria;o__Actinomycetales;f__Bifidobacteriaceae;g__Bifidobacterium;s__Bifidobacterium adolescentis	SRS1563117	SRP076119	United States	ftp://ftp.ebi.ac.uk/pub/databases/metagenomics/mgnify_genomes/human-gut/v1.0/all_genomes/MGYG-HGUT-023/MGYG-HGUT-02395/genomes1/GUT_GENOME180316.gff.gz	1
GUT_GENOME024835_00469	GUT_GENOME024835_00469	KEF28001.1	O-deglycosylation	1	780	1	780	780	97.051	0	1558	100	1144530	51	48319	59.96	56.36	0.23	GUT_GENOME142522	d__Bacteria;p__Actinobacteriota;c__Actinobacteria;o__Actinomycetales;f__Bifidobacteriaceae;g__Bifidobacterium;s__Bifidobacterium adolescentis	ERS1444559	ERP019502	Kazakhstan	ftp://ftp.ebi.ac.uk/pub/databases/metagenomics/mgnify_genomes/human-gut/v1.0/all_genomes/MGYG-HGUT-023/MGYG-HGUT-02395/genomes2/GUT_GENOME024835.gff.gz	1
GUT_GENOME026216_00676	GUT_GENOME026216_00676	KEF28001.1	O-deglycosylation	1	780	1	780	780	97.051	0	1556	100	898102	66	23216	58.94	50.88	0	GUT_GENOME142522	d__Bacteria;p__Actinobacteriota;c__Actinobacteria;o__Actinomycetales;f__Bifidobacteriaceae;g__Bifidobacterium;s__Bifidobacterium adolescentis	ERS1444603	ERP019502	Kazakhstan	ftp://ftp.ebi.ac.uk/pub/databases/metagenomics/mgnify_genomes/human-gut/v1.0/all_genomes/MGYG-HGUT-023/MGYG-HGUT-02395/genomes4/GUT_GENOME026216.gff.gz	1
GUT_GENOME190852_01322	GUT_GENOME007787_00414	CCC80442.1	De-rhamnosylation	4	523	3	521	525	43.048	2.49e-150	450	99	3781825	150	49308	43.17	99.15	1.27	GUT_GENOME000004	d__Bacteria;p__Firmicutes_A;c__Clostridia;o__Lachnospirales;f__Lachnospiraceae;g__Blautia_A;s__Blautia_A sp900066165	ERS554207	ERP007090	Sweden	ftp://ftp.ebi.ac.uk/pub/databases/metagenomics/mgnify_genomes/human-gut/v1.0/all_genomes/MGYG-HGUT-000/MGYG-HGUT-00002/genomes1/GUT_GENOME007787.gff.gz	5
GUT_GENOME026918_01392	GUT_GENOME026918_01392	KEF28001.1	O-deglycosylation	1	780	1	780	780	97.051	0	1556	100	1941766	164	19239	60.03	94.11	1.7	GUT_GENOME142522	d__Bacteria;p__Actinobacteriota;c__Actinobacteria;o__Actinomycetales;f__Bifidobacteriaceae;g__Bifidobacterium;s__Bifidobacterium adolescentis	ERS1444627	ERP019502	Kazakhstan	ftp://ftp.ebi.ac.uk/pub/databases/metagenomics/mgnify_genomes/human-gut/v1.0/all_genomes/MGYG-HGUT-023/MGYG-HGUT-02395/genomes5/GUT_GENOME026918.gff.gz	4
GUT_GENOME026998_00994	GUT_GENOME026998_00994	KEF28001.1	O-deglycosylation	1	780	1	780	780	97.051	0	1558	100	1300374	11	209519	59.63	64.09	0.38	GUT_GENOME142522	d__Bacteria;p__Actinobacteriota;c__Actinobacteria;o__Actinomycetales;f__Bifidobacteriaceae;g__Bifidobacterium;s__Bifidobacterium adolescentis	ERS1444629	ERP019502	Kazakhstan	ftp://ftp.ebi.ac.uk/pub/databases/metagenomics/mgnify_genomes/human-gut/v1.0/all_genomes/MGYG-HGUT-023/MGYG-HGUT-02395/genomes1/GUT_GENOME026998.gff.gz	1
GUT_GENOME191012_02082	GUT_GENOME191012_02082	CCC80440.1	De-rhamnosylation	9	624	6	630	625	44.96	0	585	94	3018964	288	14467	43.56	94.22	1.27	GUT_GENOME000004	d__Bacteria;p__Firmicutes_A;c__Clostridia;o__Lachnospirales;f__Lachnospiraceae;g__Blautia_A;s__Blautia_A sp900066165	SRS1820364	SRP093965	United States	ftp://ftp.ebi.ac.uk/pub/databases/metagenomics/mgnify_genomes/human-gut/v1.0/all_genomes/MGYG-HGUT-000/MGYG-HGUT-00002/genomes1/GUT_GENOME191012.gff.gz	1
GUT_GENOME191012_02242	GUT_GENOME191012_02242	CCC80442.1	De-rhamnosylation	4	523	3	521	525	42.857	5.75e-150	449	99	3018964	288	14467	43.56	94.22	1.27	GUT_GENOME000004	d__Bacteria;p__Firmicutes_A;c__Clostridia;o__Lachnospirales;f__Lachnospiraceae;g__Blautia_A;s__Blautia_A sp900066165	SRS1820364	SRP093965	United States	ftp://ftp.ebi.ac.uk/pub/databases/metagenomics/mgnify_genomes/human-gut/v1.0/all_genomes/MGYG-HGUT-000/MGYG-HGUT-00002/genomes1/GUT_GENOME191012.gff.gz	1
GUT_GENOME027019_01348	GUT_GENOME027019_01348	KEF28001.1	O-deglycosylation	1	780	1	780	780	97.051	0	1558	100	1834080	61	47691	59.66	92.89	0.23	GUT_GENOME142522	d__Bacteria;p__Actinobacteriota;c__Actinobacteria;o__Actinomycetales;f__Bifidobacteriaceae;g__Bifidobacterium;s__Bifidobacterium adolescentis	ERS1444630	ERP019502	Kazakhstan	ftp://ftp.ebi.ac.uk/pub/databases/metagenomics/mgnify_genomes/human-gut/v1.0/all_genomes/MGYG-HGUT-023/MGYG-HGUT-02395/genomes4/GUT_GENOME027019.gff.gz	1
GUT_GENOME191360_00307	GUT_GENOME191360_00307	CCC80442.1	De-rhamnosylation	4	523	3	521	525	43.238	9.08e-152	453	99	3109981	289	15441	43.54	75.79	3.51	GUT_GENOME000004	d__Bacteria;p__Firmicutes_A;c__Clostridia;o__Lachnospirales;f__Lachnospiraceae;g__Blautia_A;s__Blautia_A sp900066165	SRS1820382	SRP093965	United States	ftp://ftp.ebi.ac.uk/pub/databases/metagenomics/mgnify_genomes/human-gut/v1.0/all_genomes/MGYG-HGUT-000/MGYG-HGUT-00002/genomes1/GUT_GENOME191360.gff.gz	1
GUT_GENOME191360_01446	GUT_GENOME191360_01446	CCC80440.1	De-rhamnosylation	9	627	6	633	628	45.064	0	587	95	3109981	289	15441	43.54	75.79	3.51	GUT_GENOME000004	d__Bacteria;p__Firmicutes_A;c__Clostridia;o__Lachnospirales;f__Lachnospiraceae;g__Blautia_A;s__Blautia_A sp900066165	SRS1820382	SRP093965	United States	ftp://ftp.ebi.ac.uk/pub/databases/metagenomics/mgnify_genomes/human-gut/v1.0/all_genomes/MGYG-HGUT-000/MGYG-HGUT-00002/genomes1/GUT_GENOME191360.gff.gz	1
GUT_GENOME191360_01885	GUT_GENOME191360_01885	ANI69962.1	O-demethylation	2	257	1	255	257	40.078	5.06e-56	203	94	3109981	289	15441	43.54	75.79	3.51	GUT_GENOME000004	d__Bacteria;p__Firmicutes_A;c__Clostridia;o__Lachnospirales;f__Lachnospiraceae;g__Blautia_A;s__Blautia_A sp900066165	SRS1820382	SRP093965	United States	ftp://ftp.ebi.ac.uk/pub/databases/metagenomics/mgnify_genomes/human-gut/v1.0/all_genomes/MGYG-HGUT-000/MGYG-HGUT-00002/genomes1/GUT_GENOME191360.gff.gz	1
GUT_GENOME038842_01097	GUT_GENOME038842_01097	KEF28001.1	O-deglycosylation	1	780	1	780	780	97.051	0	1556	100	1896149	128	25775	59.84	97.3	1.59	GUT_GENOME142522	d__Bacteria;p__Actinobacteriota;c__Actinobacteria;o__Actinomycetales;f__Bifidobacteriaceae;g__Bifidobacterium;s__Bifidobacterium adolescentis	ERS1066648	ERP013933	United States	ftp://ftp.ebi.ac.uk/pub/databases/metagenomics/mgnify_genomes/human-gut/v1.0/all_genomes/MGYG-HGUT-023/MGYG-HGUT-02395/genomes4/GUT_GENOME038842.gff.gz	3
GUT_GENOME064909_01286	GUT_GENOME064909_01286	KEF28001.1	O-deglycosylation	1	780	1	780	780	97.051	0	1554	100	1952356	123	28815	59.84	94.1	1.59	GUT_GENOME142522	d__Bacteria;p__Actinobacteriota;c__Actinobacteria;o__Actinomycetales;f__Bifidobacteriaceae;g__Bifidobacterium;s__Bifidobacterium adolescentis	ERS608564	ERP008729	Austria	ftp://ftp.ebi.ac.uk/pub/databases/metagenomics/mgnify_genomes/human-gut/v1.0/all_genomes/MGYG-HGUT-023/MGYG-HGUT-02395/genomes3/GUT_GENOME064909.gff.gz	1
GUT_GENOME077533_01299	GUT_GENOME048808_01631	KEF28001.1	O-deglycosylation	1	780	1	780	780	97.051	0	1556	100	2090010	129	25655	59.44	95.41	2.84	GUT_GENOME142522	d__Bacteria;p__Actinobacteriota;c__Actinobacteria;o__Actinomycetales;f__Bifidobacteriaceae;g__Bifidobacterium;s__Bifidobacterium adolescentis	ERS1647333	ERP019674	Germany	ftp://ftp.ebi.ac.uk/pub/databases/metagenomics/mgnify_genomes/human-gut/v1.0/all_genomes/MGYG-HGUT-023/MGYG-HGUT-02395/genomes4/GUT_GENOME048808.gff.gz	9
GUT_GENOME080377_02204	GUT_GENOME007198_01166	KEF28001.1	O-deglycosylation	1	780	1	780	780	97.051	0	1558	100	1882697	128	21243	59.88	92.28	1.63	GUT_GENOME142522	d__Bacteria;p__Actinobacteriota;c__Actinobacteria;o__Actinomycetales;f__Bifidobacteriaceae;g__Bifidobacterium;s__Bifidobacterium adolescentis	ERS473409	ERP005989	Sweden	ftp://ftp.ebi.ac.uk/pub/databases/metagenomics/mgnify_genomes/human-gut/v1.0/all_genomes/MGYG-HGUT-023/MGYG-HGUT-02395/genomes5/GUT_GENOME007198.gff.gz	1
GUT_GENOME087059_01418	GUT_GENOME087059_01418	KEF28001.1	O-deglycosylation	1	780	1	780	780	97.051	0	1557	100	2206825	54	83011	59.42	97.42	0.91	GUT_GENOME142522	d__Bacteria;p__Actinobacteriota;c__Actinobacteria;o__Actinomycetales;f__Bifidobacteriaceae;g__Bifidobacterium;s__Bifidobacterium adolescentis	ERS608479	ERP008729	Austria	ftp://ftp.ebi.ac.uk/pub/databases/metagenomics/mgnify_genomes/human-gut/v1.0/all_genomes/MGYG-HGUT-023/MGYG-HGUT-02395/genomes2/GUT_GENOME087059.gff.gz	1
GUT_GENOME191628_00944	GUT_GENOME189248_01932	QBM20342.1	De-rhamnosylation	1	887	1	887	895	54.749	0	1016	99	3228540	240	20582	43.56	92.36	1.9	GUT_GENOME000004	d__Bacteria;p__Firmicutes_A;c__Clostridia;o__Lachnospirales;f__Lachnospiraceae;g__Blautia_A;s__Blautia_A sp900066165	SRS1820250	SRP093965	United States	ftp://ftp.ebi.ac.uk/pub/databases/metagenomics/mgnify_genomes/human-gut/v1.0/all_genomes/MGYG-HGUT-000/MGYG-HGUT-00002/genomes1/GUT_GENOME189248.gff.gz	3
GUT_GENOME191628_01230	GUT_GENOME191628_01230	ANI69962.1	O-demethylation	2	257	1	255	257	40.078	2.59e-59	205	94	2771935	369	9496	43.41	76.51	2.85	GUT_GENOME000004	d__Bacteria;p__Firmicutes_A;c__Clostridia;o__Lachnospirales;f__Lachnospiraceae;g__Blautia_A;s__Blautia_A sp900066165	SRS1820396	SRP093965	United States	ftp://ftp.ebi.ac.uk/pub/databases/metagenomics/mgnify_genomes/human-gut/v1.0/all_genomes/MGYG-HGUT-000/MGYG-HGUT-00002/genomes1/GUT_GENOME191628.gff.gz	1
GUT_GENOME087625_01629	GUT_GENOME087625_01629	KEF28001.1	O-deglycosylation	1	780	1	780	780	97.051	0	1556	100	2012028	240	17326	59.61	95.46	0.61	GUT_GENOME142522	d__Bacteria;p__Actinobacteriota;c__Actinobacteria;o__Actinomycetales;f__Bifidobacteriaceae;g__Bifidobacterium;s__Bifidobacterium adolescentis	ERS608502	ERP008729	Austria	ftp://ftp.ebi.ac.uk/pub/databases/metagenomics/mgnify_genomes/human-gut/v1.0/all_genomes/MGYG-HGUT-023/MGYG-HGUT-02395/genomes3/GUT_GENOME087625.gff.gz	1
GUT_GENOME192338_00608	GUT_GENOME192338_00608	ANI69962.1	O-demethylation	2	257	1	255	257	40.078	5.87e-56	203	94	3084107	362	10710	43.39	78.91	4.02	GUT_GENOME000004	d__Bacteria;p__Firmicutes_A;c__Clostridia;o__Lachnospirales;f__Lachnospiraceae;g__Blautia_A;s__Blautia_A sp900066165	SRS1820429	SRP093965	United States	ftp://ftp.ebi.ac.uk/pub/databases/metagenomics/mgnify_genomes/human-gut/v1.0/all_genomes/MGYG-HGUT-000/MGYG-HGUT-00002/genomes1/GUT_GENOME192338.gff.gz	1
GUT_GENOME192569_01290	GUT_GENOME104473_00642	CCC80442.1	De-rhamnosylation	16	524	6	509	514	41.634	1.15e-134	409	97	2985269	255	19119	43.52	80.75	0.63	GUT_GENOME000004	d__Bacteria;p__Firmicutes_A;c__Clostridia;o__Lachnospirales;f__Lachnospiraceae;g__Blautia_A;s__Blautia_A sp900066165	ERS235604	ERP002469	Sweden	ftp://ftp.ebi.ac.uk/pub/databases/metagenomics/mgnify_genomes/human-gut/v1.0/all_genomes/MGYG-HGUT-000/MGYG-HGUT-00002/genomes1/GUT_GENOME104473.gff.gz	4
GUT_GENOME088413_01342	GUT_GENOME088413_01342	KEF28001.1	O-deglycosylation	1	780	1	780	780	97.051	0	1557	100	2123825	62	72741	59.62	98.07	0.15	GUT_GENOME142522	d__Bacteria;p__Actinobacteriota;c__Actinobacteria;o__Actinomycetales;f__Bifidobacteriaceae;g__Bifidobacterium;s__Bifidobacterium adolescentis	ERS608537	ERP008729	Austria	ftp://ftp.ebi.ac.uk/pub/databases/metagenomics/mgnify_genomes/human-gut/v1.0/all_genomes/MGYG-HGUT-023/MGYG-HGUT-02395/genomes2/GUT_GENOME088413.gff.gz	2
GUT_GENOME090138_00837	GUT_GENOME090138_00837	KEF28001.1	O-deglycosylation	1	780	1	780	780	97.051	0	1558	100	1693356	144	19849	60.05	94.55	1.02	GUT_GENOME142522	d__Bacteria;p__Actinobacteriota;c__Actinobacteria;o__Actinomycetales;f__Bifidobacteriaceae;g__Bifidobacterium;s__Bifidobacterium adolescentis	ERS608601	ERP008729	Austria	ftp://ftp.ebi.ac.uk/pub/databases/metagenomics/mgnify_genomes/human-gut/v1.0/all_genomes/MGYG-HGUT-023/MGYG-HGUT-02395/genomes1/GUT_GENOME090138.gff.gz	1
GUT_GENOME090245_00921	GUT_GENOME090245_00921	KEF28001.1	O-deglycosylation	1	780	1	780	780	97.051	0	1557	100	2020582	38	115298	59.64	99.7	0.57	GUT_GENOME142522	d__Bacteria;p__Actinobacteriota;c__Actinobacteria;o__Actinomycetales;f__Bifidobacteriaceae;g__Bifidobacterium;s__Bifidobacterium adolescentis	ERS608604	ERP008729	Austria	ftp://ftp.ebi.ac.uk/pub/databases/metagenomics/mgnify_genomes/human-gut/v1.0/all_genomes/MGYG-HGUT-023/MGYG-HGUT-02395/genomes3/GUT_GENOME090245.gff.gz	2
GUT_GENOME090963_00870	GUT_GENOME087275_00385	KEF28001.1	O-deglycosylation	1	780	1	780	780	97.051	0	1555	100	2192459	63	74910	59.35	97.65	1.08	GUT_GENOME142522	d__Bacteria;p__Actinobacteriota;c__Actinobacteria;o__Actinomycetales;f__Bifidobacteriaceae;g__Bifidobacterium;s__Bifidobacterium adolescentis	ERS608489	ERP008729	Austria	ftp://ftp.ebi.ac.uk/pub/databases/metagenomics/mgnify_genomes/human-gut/v1.0/all_genomes/MGYG-HGUT-023/MGYG-HGUT-02395/genomes2/GUT_GENOME087275.gff.gz	2
GUT_GENOME094277_00410	GUT_GENOME094277_00410	KEF28001.1	O-deglycosylation	1	780	1	780	780	97.051	0	1556	100	1607895	229	10434	59.8	72.56	2.05	GUT_GENOME142522	d__Bacteria;p__Actinobacteriota;c__Actinobacteria;o__Actinomycetales;f__Bifidobacteriaceae;g__Bifidobacterium;s__Bifidobacterium adolescentis	ERS608539	ERP008729	Austria	ftp://ftp.ebi.ac.uk/pub/databases/metagenomics/mgnify_genomes/human-gut/v1.0/all_genomes/MGYG-HGUT-023/MGYG-HGUT-02395/genomes4/GUT_GENOME094277.gff.gz	1
GUT_GENOME192775_00049	GUT_GENOME188492_01115	CCC80442.1	De-rhamnosylation	4	523	3	521	525	43.048	1.01e-150	451	99	3872485	297	21067	42.97	92.31	2.85	GUT_GENOME000004	d__Bacteria;p__Firmicutes_A;c__Clostridia;o__Lachnospirales;f__Lachnospiraceae;g__Blautia_A;s__Blautia_A sp900066165	SRS1820194	SRP093965	United States	ftp://ftp.ebi.ac.uk/pub/databases/metagenomics/mgnify_genomes/human-gut/v1.0/all_genomes/MGYG-HGUT-000/MGYG-HGUT-00002/genomes1/GUT_GENOME188492.gff.gz	5
GUT_GENOME095049_00699	GUT_GENOME095049_00699	KEF28001.1	O-deglycosylation	1	780	1	780	780	97.051	0	1558	100	1844238	295	7999	59.79	85.83	3.64	GUT_GENOME142522	d__Bacteria;p__Actinobacteriota;c__Actinobacteria;o__Actinomycetales;f__Bifidobacteriaceae;g__Bifidobacterium;s__Bifidobacterium adolescentis	ERS631828	ERP008729	Austria	ftp://ftp.ebi.ac.uk/pub/databases/metagenomics/mgnify_genomes/human-gut/v1.0/all_genomes/MGYG-HGUT-023/MGYG-HGUT-02395/genomes4/GUT_GENOME095049.gff.gz	1
GUT_GENOME192798_00029	GUT_GENOME188826_01540	CCC80442.1	De-rhamnosylation	4	523	3	521	525	43.048	5.82e-151	451	99	2336126	119	26082	43.76	62	1.89	GUT_GENOME000004	d__Bacteria;p__Firmicutes_A;c__Clostridia;o__Lachnospirales;f__Lachnospiraceae;g__Blautia_A;s__Blautia_A sp900066165	SRS1820214	SRP093965	United States	ftp://ftp.ebi.ac.uk/pub/databases/metagenomics/mgnify_genomes/human-gut/v1.0/all_genomes/MGYG-HGUT-000/MGYG-HGUT-00002/genomes1/GUT_GENOME188826.gff.gz	4
GUT_GENOME114821_00726	GUT_GENOME114821_00726	KEF28001.1	O-deglycosylation	1	780	1	780	780	97.051	0	1558	100	1927094	187	15962	59.6	96.06	0.9	GUT_GENOME142522	d__Bacteria;p__Actinobacteriota;c__Actinobacteria;o__Actinomycetales;f__Bifidobacteriaceae;g__Bifidobacterium;s__Bifidobacterium adolescentis	ERS396293	ERP004605	Denmark	ftp://ftp.ebi.ac.uk/pub/databases/metagenomics/mgnify_genomes/human-gut/v1.0/all_genomes/MGYG-HGUT-023/MGYG-HGUT-02395/genomes2/GUT_GENOME114821.gff.gz	1
GUT_GENOME192908_00108	GUT_GENOME192908_00108	CCC80442.1	De-rhamnosylation	4	523	3	521	525	43.238	2.1e-151	452	99	2945190	231	18491	43.56	80.79	4.87	GUT_GENOME000004	d__Bacteria;p__Firmicutes_A;c__Clostridia;o__Lachnospirales;f__Lachnospiraceae;g__Blautia_A;s__Blautia_A sp900066165	SRS1820456	SRP093965	United States	ftp://ftp.ebi.ac.uk/pub/databases/metagenomics/mgnify_genomes/human-gut/v1.0/all_genomes/MGYG-HGUT-000/MGYG-HGUT-00002/genomes1/GUT_GENOME192908.gff.gz	1
GUT_GENOME192908_00143	GUT_GENOME192908_00143	ANI69962.1	O-demethylation	2	257	1	255	257	40.078	4.2e-56	204	94	2945190	231	18491	43.56	80.79	4.87	GUT_GENOME000004	d__Bacteria;p__Firmicutes_A;c__Clostridia;o__Lachnospirales;f__Lachnospiraceae;g__Blautia_A;s__Blautia_A sp900066165	SRS1820456	SRP093965	United States	ftp://ftp.ebi.ac.uk/pub/databases/metagenomics/mgnify_genomes/human-gut/v1.0/all_genomes/MGYG-HGUT-000/MGYG-HGUT-00002/genomes1/GUT_GENOME192908.gff.gz	1
GUT_GENOME128348_00743	GUT_GENOME128348_00743	KEF28001.1	O-deglycosylation	1	780	1	780	780	97.051	0	1556	100	1718046	223	10822	60.04	87.93	1.86	GUT_GENOME142522	d__Bacteria;p__Actinobacteriota;c__Actinobacteria;o__Actinomycetales;f__Bifidobacteriaceae;g__Bifidobacterium;s__Bifidobacterium adolescentis	SRS1596821	SRP080787	Mongolia	ftp://ftp.ebi.ac.uk/pub/databases/metagenomics/mgnify_genomes/human-gut/v1.0/all_genomes/MGYG-HGUT-023/MGYG-HGUT-02395/genomes2/GUT_GENOME128348.gff.gz	1
GUT_GENOME193042_00806	GUT_GENOME193042_00806	CCC80442.1	De-rhamnosylation	4	523	3	521	525	42.857	5.75e-150	449	99	3262180	388	10726	43.75	86.87	3.31	GUT_GENOME000004	d__Bacteria;p__Firmicutes_A;c__Clostridia;o__Lachnospirales;f__Lachnospiraceae;g__Blautia_A;s__Blautia_A sp900066165	SRS1820467	SRP093965	United States	ftp://ftp.ebi.ac.uk/pub/databases/metagenomics/mgnify_genomes/human-gut/v1.0/all_genomes/MGYG-HGUT-000/MGYG-HGUT-00002/genomes1/GUT_GENOME193042.gff.gz	1
GUT_GENOME193042_00883	GUT_GENOME193042_00883	QBM20340.1	De-rhamnosylation	4	828	2	834	850	42.706	0	639	99	3262180	388	10726	43.75	86.87	3.31	GUT_GENOME000004	d__Bacteria;p__Firmicutes_A;c__Clostridia;o__Lachnospirales;f__Lachnospiraceae;g__Blautia_A;s__Blautia_A sp900066165	SRS1820467	SRP093965	United States	ftp://ftp.ebi.ac.uk/pub/databases/metagenomics/mgnify_genomes/human-gut/v1.0/all_genomes/MGYG-HGUT-000/MGYG-HGUT-00002/genomes1/GUT_GENOME193042.gff.gz	1
GUT_GENOME128463_00811	GUT_GENOME128463_00811	KEF28001.1	O-deglycosylation	1	780	1	780	780	97.051	0	1557	100	1071168	48	38532	60.66	57.05	0	GUT_GENOME142522	d__Bacteria;p__Actinobacteriota;c__Actinobacteria;o__Actinomycetales;f__Bifidobacteriaceae;g__Bifidobacterium;s__Bifidobacterium adolescentis	SRS1596827	SRP080787	Mongolia	ftp://ftp.ebi.ac.uk/pub/databases/metagenomics/mgnify_genomes/human-gut/v1.0/all_genomes/MGYG-HGUT-023/MGYG-HGUT-02395/genomes2/GUT_GENOME128463.gff.gz	2
GUT_GENOME131862_01418	GUT_GENOME131862_01418	KEF28001.1	O-deglycosylation	1	780	1	780	780	97.051	0	1556	100	1913585	99	34257	59.69	99.55	0.45	GUT_GENOME142522	d__Bacteria;p__Actinobacteriota;c__Actinobacteria;o__Actinomycetales;f__Bifidobacteriaceae;g__Bifidobacterium;s__Bifidobacterium adolescentis	NA	NA	Germany	ftp://ftp.ebi.ac.uk/pub/databases/metagenomics/mgnify_genomes/human-gut/v1.0/all_genomes/MGYG-HGUT-023/MGYG-HGUT-02395/genomes4/GUT_GENOME131862.gff.gz	1
GUT_GENOME193042_01835	GUT_GENOME193042_01835	CCC80440.1	De-rhamnosylation	9	624	6	630	625	44.96	0	585	94	3262180	388	10726	43.75	86.87	3.31	GUT_GENOME000004	d__Bacteria;p__Firmicutes_A;c__Clostridia;o__Lachnospirales;f__Lachnospiraceae;g__Blautia_A;s__Blautia_A sp900066165	SRS1820467	SRP093965	United States	ftp://ftp.ebi.ac.uk/pub/databases/metagenomics/mgnify_genomes/human-gut/v1.0/all_genomes/MGYG-HGUT-000/MGYG-HGUT-00002/genomes1/GUT_GENOME193042.gff.gz	1
GUT_GENOME193042_02582	GUT_GENOME193042_02582	CCC80442.1	De-rhamnosylation	89	524	1	437	440	41.364	1.23e-118	366	83	3262180	388	10726	43.75	86.87	3.31	GUT_GENOME000004	d__Bacteria;p__Firmicutes_A;c__Clostridia;o__Lachnospirales;f__Lachnospiraceae;g__Blautia_A;s__Blautia_A sp900066165	SRS1820467	SRP093965	United States	ftp://ftp.ebi.ac.uk/pub/databases/metagenomics/mgnify_genomes/human-gut/v1.0/all_genomes/MGYG-HGUT-000/MGYG-HGUT-00002/genomes1/GUT_GENOME193042.gff.gz	1
GUT_GENOME142513_01331	GUT_GENOME142513_01331	KEF28001.1	O-deglycosylation	1	780	1	780	780	97.051	0	1558	100	2095557	8	1211201	59.38	100	0	GUT_GENOME142522	d__Bacteria;p__Actinobacteriota;c__Actinobacteria;o__Actinomycetales;f__Bifidobacteriaceae;g__Bifidobacterium;s__Bifidobacterium adolescentis	SAMN04231313	PRJNA300965	Italy	ftp://ftp.ebi.ac.uk/pub/databases/metagenomics/mgnify_genomes/human-gut/v1.0/all_genomes/MGYG-HGUT-023/MGYG-HGUT-02395/genomes2/GUT_GENOME142513.gff.gz	1
GUT_GENOME193244_01351	GUT_GENOME193244_01351	QBM20342.1	De-rhamnosylation	1	887	1	887	895	54.525	0	1013	99	1992975	106	30289	43.45	54.03	0.63	GUT_GENOME000004	d__Bacteria;p__Firmicutes_A;c__Clostridia;o__Lachnospirales;f__Lachnospiraceae;g__Blautia_A;s__Blautia_A sp900066165	SRS1820487	SRP093965	United States	ftp://ftp.ebi.ac.uk/pub/databases/metagenomics/mgnify_genomes/human-gut/v1.0/all_genomes/MGYG-HGUT-000/MGYG-HGUT-00002/genomes1/GUT_GENOME193244.gff.gz	1
GUT_GENOME142516_01528	GUT_GENOME142516_01528	KEF28001.1	O-deglycosylation	1	780	1	780	780	97.051	0	1556	100	2381816	26	381395	59.93	100	0	GUT_GENOME142522	d__Bacteria;p__Actinobacteriota;c__Actinobacteria;o__Actinomycetales;f__Bifidobacteriaceae;g__Bifidobacterium;s__Bifidobacterium adolescentis	SAMN04231312	PRJNA300965	Italy	ftp://ftp.ebi.ac.uk/pub/databases/metagenomics/mgnify_genomes/human-gut/v1.0/all_genomes/MGYG-HGUT-023/MGYG-HGUT-02395/genomes2/GUT_GENOME142516.gff.gz	1
GUT_GENOME193503_00714	GUT_GENOME193503_00714	CCC80442.1	De-rhamnosylation	4	523	3	521	525	43.238	1.09e-151	453	99	3198831	244	20198	43.59	86.87	3.67	GUT_GENOME000004	d__Bacteria;p__Firmicutes_A;c__Clostridia;o__Lachnospirales;f__Lachnospiraceae;g__Blautia_A;s__Blautia_A sp900066165	SRS1820503	SRP093965	United States	ftp://ftp.ebi.ac.uk/pub/databases/metagenomics/mgnify_genomes/human-gut/v1.0/all_genomes/MGYG-HGUT-000/MGYG-HGUT-00002/genomes1/GUT_GENOME193503.gff.gz	1
GUT_GENOME193503_00826	GUT_GENOME193503_00826	ANI69962.1	O-demethylation	2	257	1	255	257	40.078	5.76e-56	203	94	3198831	244	20198	43.59	86.87	3.67	GUT_GENOME000004	d__Bacteria;p__Firmicutes_A;c__Clostridia;o__Lachnospirales;f__Lachnospiraceae;g__Blautia_A;s__Blautia_A sp900066165	SRS1820503	SRP093965	United States	ftp://ftp.ebi.ac.uk/pub/databases/metagenomics/mgnify_genomes/human-gut/v1.0/all_genomes/MGYG-HGUT-000/MGYG-HGUT-00002/genomes1/GUT_GENOME193503.gff.gz	1
GUT_GENOME157853_00394	GUT_GENOME157853_00394	KEF28001.1	O-deglycosylation	1	780	1	780	780	97.051	0	1558	100	1152564	35	74126	59.94	53.02	0	GUT_GENOME142522	d__Bacteria;p__Actinobacteriota;c__Actinobacteria;o__Actinomycetales;f__Bifidobacteriaceae;g__Bifidobacterium;s__Bifidobacterium adolescentis	ERS634967	ERP009131	Canada	ftp://ftp.ebi.ac.uk/pub/databases/metagenomics/mgnify_genomes/human-gut/v1.0/all_genomes/MGYG-HGUT-023/MGYG-HGUT-02395/genomes4/GUT_GENOME157853.gff.gz	1
GUT_GENOME193555_00688	GUT_GENOME029225_00117	ANI69962.1	O-demethylation	2	257	1	255	257	40.078	5.11e-56	203	94	3121419	144	34019	43.38	93.43	2.53	GUT_GENOME000004	d__Bacteria;p__Firmicutes_A;c__Clostridia;o__Lachnospirales;f__Lachnospiraceae;g__Blautia_A;s__Blautia_A sp900066165	ERS848621	ERP012177	China	ftp://ftp.ebi.ac.uk/pub/databases/metagenomics/mgnify_genomes/human-gut/v1.0/all_genomes/MGYG-HGUT-000/MGYG-HGUT-00002/genomes1/GUT_GENOME029225.gff.gz	22
GUT_GENOME193615_00256	GUT_GENOME193615_00256	CCC80442.1	De-rhamnosylation	4	523	3	521	525	43.238	9.69e-152	453	99	1958054	249	9984	43.92	50.88	0	GUT_GENOME000004	d__Bacteria;p__Firmicutes_A;c__Clostridia;o__Lachnospirales;f__Lachnospiraceae;g__Blautia_A;s__Blautia_A sp900066165	SRS1820507	SRP093965	United States	ftp://ftp.ebi.ac.uk/pub/databases/metagenomics/mgnify_genomes/human-gut/v1.0/all_genomes/MGYG-HGUT-000/MGYG-HGUT-00002/genomes1/GUT_GENOME193615.gff.gz	1
GUT_GENOME160330_00947	GUT_GENOME160330_00947	KEF28001.1	O-deglycosylation	1	780	1	780	780	97.051	0	1556	100	1830556	170	15529	59.86	92.59	0.45	GUT_GENOME142522	d__Bacteria;p__Actinobacteriota;c__Actinobacteria;o__Actinomycetales;f__Bifidobacteriaceae;g__Bifidobacterium;s__Bifidobacterium adolescentis	SRS1876582	SRP095580	Netherlands	ftp://ftp.ebi.ac.uk/pub/databases/metagenomics/mgnify_genomes/human-gut/v1.0/all_genomes/MGYG-HGUT-023/MGYG-HGUT-02395/genomes2/GUT_GENOME160330.gff.gz	1
GUT_GENOME193615_01326	GUT_GENOME193615_01326	ANI69961.1	O-demethylation	13	210	75	272	199	47.236	5.58e-51	185	94	1958054	249	9984	43.92	50.88	0	GUT_GENOME000004	d__Bacteria;p__Firmicutes_A;c__Clostridia;o__Lachnospirales;f__Lachnospiraceae;g__Blautia_A;s__Blautia_A sp900066165	SRS1820507	SRP093965	United States	ftp://ftp.ebi.ac.uk/pub/databases/metagenomics/mgnify_genomes/human-gut/v1.0/all_genomes/MGYG-HGUT-000/MGYG-HGUT-00002/genomes1/GUT_GENOME193615.gff.gz	1
GUT_GENOME193648_00096	GUT_GENOME193648_00096	QBM20340.1	De-rhamnosylation	4	828	2	834	850	42.941	0	639	99	2074339	332	7448	43.87	72.89	1.27	GUT_GENOME000004	d__Bacteria;p__Firmicutes_A;c__Clostridia;o__Lachnospirales;f__Lachnospiraceae;g__Blautia_A;s__Blautia_A sp900066165	SRS1820255	SRP093965	United States	ftp://ftp.ebi.ac.uk/pub/databases/metagenomics/mgnify_genomes/human-gut/v1.0/all_genomes/MGYG-HGUT-000/MGYG-HGUT-00002/genomes1/GUT_GENOME193648.gff.gz	1
GUT_GENOME161902_00883	GUT_GENOME161902_00883	KEF28001.1	O-deglycosylation	1	780	1	780	780	97.051	0	1559	100	1963567	136	27691	59.8	95.96	0.23	GUT_GENOME142522	d__Bacteria;p__Actinobacteriota;c__Actinobacteria;o__Actinomycetales;f__Bifidobacteriaceae;g__Bifidobacterium;s__Bifidobacterium adolescentis	SRS1876391	SRP095580	Netherlands	ftp://ftp.ebi.ac.uk/pub/databases/metagenomics/mgnify_genomes/human-gut/v1.0/all_genomes/MGYG-HGUT-023/MGYG-HGUT-02395/genomes3/GUT_GENOME161902.gff.gz	1
GUT_GENOME162130_01448	GUT_GENOME162130_01448	KEF28001.1	O-deglycosylation	1	780	1	780	780	97.051	0	1556	100	2161609	67	76107	59.48	98.33	3.41	GUT_GENOME142522	d__Bacteria;p__Actinobacteriota;c__Actinobacteria;o__Actinomycetales;f__Bifidobacteriaceae;g__Bifidobacterium;s__Bifidobacterium adolescentis	SRS1876272	SRP095580	Netherlands	ftp://ftp.ebi.ac.uk/pub/databases/metagenomics/mgnify_genomes/human-gut/v1.0/all_genomes/MGYG-HGUT-023/MGYG-HGUT-02395/genomes5/GUT_GENOME162130.gff.gz	1
GUT_GENOME193914_00009	GUT_GENOME188826_00032	ANI69962.1	O-demethylation	2	257	1	255	257	40.078	4.46e-56	203	94	2336126	119	26082	43.76	62	1.89	GUT_GENOME000004	d__Bacteria;p__Firmicutes_A;c__Clostridia;o__Lachnospirales;f__Lachnospiraceae;g__Blautia_A;s__Blautia_A sp900066165	SRS1820214	SRP093965	United States	ftp://ftp.ebi.ac.uk/pub/databases/metagenomics/mgnify_genomes/human-gut/v1.0/all_genomes/MGYG-HGUT-000/MGYG-HGUT-00002/genomes1/GUT_GENOME188826.gff.gz	4
GUT_GENOME162229_00911	GUT_GENOME162229_00911	KEF28001.1	O-deglycosylation	1	780	1	780	780	97.051	0	1556	100	1822483	214	11560	59.76	93.64	3.46	GUT_GENOME142522	d__Bacteria;p__Actinobacteriota;c__Actinobacteria;o__Actinomycetales;f__Bifidobacteriaceae;g__Bifidobacterium;s__Bifidobacterium adolescentis	SRS1876658	SRP095580	Netherlands	ftp://ftp.ebi.ac.uk/pub/databases/metagenomics/mgnify_genomes/human-gut/v1.0/all_genomes/MGYG-HGUT-023/MGYG-HGUT-02395/genomes4/GUT_GENOME162229.gff.gz	1
GUT_GENOME162762_00086	GUT_GENOME162762_00086	KEF28001.1	O-deglycosylation	1	780	1	780	780	97.051	0	1556	100	2105537	202	15769	59.59	96.9	4.26	GUT_GENOME142522	d__Bacteria;p__Actinobacteriota;c__Actinobacteria;o__Actinomycetales;f__Bifidobacteriaceae;g__Bifidobacterium;s__Bifidobacterium adolescentis	SRS1876308	SRP095580	Netherlands	ftp://ftp.ebi.ac.uk/pub/databases/metagenomics/mgnify_genomes/human-gut/v1.0/all_genomes/MGYG-HGUT-023/MGYG-HGUT-02395/genomes4/GUT_GENOME162762.gff.gz	1
GUT_GENOME163883_00722	GUT_GENOME163883_00722	KEF28001.1	O-deglycosylation	1	780	1	780	780	97.051	0	1556	100	1919831	172	18544	59.68	93.67	0.57	GUT_GENOME142522	d__Bacteria;p__Actinobacteriota;c__Actinobacteria;o__Actinomycetales;f__Bifidobacteriaceae;g__Bifidobacterium;s__Bifidobacterium adolescentis	SRS1876436	SRP095580	Netherlands	ftp://ftp.ebi.ac.uk/pub/databases/metagenomics/mgnify_genomes/human-gut/v1.0/all_genomes/MGYG-HGUT-023/MGYG-HGUT-02395/genomes1/GUT_GENOME163883.gff.gz	1
GUT_GENOME173283_01381	GUT_GENOME173283_01381	KEF28001.1	O-deglycosylation	1	780	1	780	780	97.051	0	1556	100	1868599	94	35068	59.81	99.02	0.45	GUT_GENOME142522	d__Bacteria;p__Actinobacteriota;c__Actinobacteria;o__Actinomycetales;f__Bifidobacteriaceae;g__Bifidobacterium;s__Bifidobacterium adolescentis	SRS1028138	SRP062282	Germany	ftp://ftp.ebi.ac.uk/pub/databases/metagenomics/mgnify_genomes/human-gut/v1.0/all_genomes/MGYG-HGUT-023/MGYG-HGUT-02395/genomes1/GUT_GENOME173283.gff.gz	1
GUT_GENOME180586_00025	GUT_GENOME180586_00025	KEF28001.1	O-deglycosylation	1	780	1	780	780	97.051	0	1556	100	1001707	12	124683	58.97	54.39	0	GUT_GENOME142522	d__Bacteria;p__Actinobacteriota;c__Actinobacteria;o__Actinomycetales;f__Bifidobacteriaceae;g__Bifidobacterium;s__Bifidobacterium adolescentis	SRS1563139	SRP076119	United States	ftp://ftp.ebi.ac.uk/pub/databases/metagenomics/mgnify_genomes/human-gut/v1.0/all_genomes/MGYG-HGUT-023/MGYG-HGUT-02395/genomes1/GUT_GENOME180586.gff.gz	1
GUT_GENOME194516_02353	GUT_GENOME191541_02901	QBM20342.1	De-rhamnosylation	1	887	1	887	895	54.749	0	1014	99	3657151	209	28751	43.17	87.38	4.75	GUT_GENOME000004	d__Bacteria;p__Firmicutes_A;c__Clostridia;o__Lachnospirales;f__Lachnospiraceae;g__Blautia_A;s__Blautia_A sp900066165	SRS1820392	SRP093965	United States	ftp://ftp.ebi.ac.uk/pub/databases/metagenomics/mgnify_genomes/human-gut/v1.0/all_genomes/MGYG-HGUT-000/MGYG-HGUT-00002/genomes1/GUT_GENOME191541.gff.gz	3
GUT_GENOME196103_00484	GUT_GENOME196103_00484	KEF28001.1	O-deglycosylation	1	780	1	780	780	97.051	0	1558	100	1944726	194	15308	59.52	94.56	0.36	GUT_GENOME142522	d__Bacteria;p__Actinobacteriota;c__Actinobacteria;o__Actinomycetales;f__Bifidobacteriaceae;g__Bifidobacterium;s__Bifidobacterium adolescentis	SRS1876301	SRP095580	Netherlands	ftp://ftp.ebi.ac.uk/pub/databases/metagenomics/mgnify_genomes/human-gut/v1.0/all_genomes/MGYG-HGUT-023/MGYG-HGUT-02395/genomes5/GUT_GENOME196103.gff.gz	1
GUT_GENOME194562_00551	GUT_GENOME194562_00551	CCC80442.1	De-rhamnosylation	4	523	3	521	525	42.857	5.75e-150	449	99	3233050	197	23418	43.36	86.51	2.11	GUT_GENOME000004	d__Bacteria;p__Firmicutes_A;c__Clostridia;o__Lachnospirales;f__Lachnospiraceae;g__Blautia_A;s__Blautia_A sp900066165	SRS1820301	SRP093965	United States	ftp://ftp.ebi.ac.uk/pub/databases/metagenomics/mgnify_genomes/human-gut/v1.0/all_genomes/MGYG-HGUT-000/MGYG-HGUT-00002/genomes1/GUT_GENOME194562.gff.gz	1
GUT_GENOME194562_00975	GUT_GENOME194562_00975	QBM20342.1	De-rhamnosylation	1	887	1	887	895	54.525	0	1012	99	3233050	197	23418	43.36	86.51	2.11	GUT_GENOME000004	d__Bacteria;p__Firmicutes_A;c__Clostridia;o__Lachnospirales;f__Lachnospiraceae;g__Blautia_A;s__Blautia_A sp900066165	SRS1820301	SRP093965	United States	ftp://ftp.ebi.ac.uk/pub/databases/metagenomics/mgnify_genomes/human-gut/v1.0/all_genomes/MGYG-HGUT-000/MGYG-HGUT-00002/genomes1/GUT_GENOME194562.gff.gz	1
GUT_GENOME218644_01016	GUT_GENOME218644_01016	KEF28001.1	O-deglycosylation	1	780	1	780	780	97.051	0	1556	100	1655956	242	7902	59.96	83.64	1.38	GUT_GENOME142522	d__Bacteria;p__Actinobacteriota;c__Actinobacteria;o__Actinomycetales;f__Bifidobacteriaceae;g__Bifidobacterium;s__Bifidobacterium adolescentis	SRS1170828	SRP066479	El Salvador	ftp://ftp.ebi.ac.uk/pub/databases/metagenomics/mgnify_genomes/human-gut/v1.0/all_genomes/MGYG-HGUT-023/MGYG-HGUT-02395/genomes2/GUT_GENOME218644.gff.gz	1
GUT_GENOME196362_00736	GUT_GENOME196362_00736	CCC80442.1	De-rhamnosylation	4	523	3	521	525	43.238	2.66e-151	452	99	2952553	484	7638	43.64	82.84	3.74	GUT_GENOME000004	d__Bacteria;p__Firmicutes_A;c__Clostridia;o__Lachnospirales;f__Lachnospiraceae;g__Blautia_A;s__Blautia_A sp900066165	SRS1876348	SRP095580	Netherlands	ftp://ftp.ebi.ac.uk/pub/databases/metagenomics/mgnify_genomes/human-gut/v1.0/all_genomes/MGYG-HGUT-000/MGYG-HGUT-00002/genomes1/GUT_GENOME196362.gff.gz	1
GUT_GENOME218734_01101	GUT_GENOME043077_00302	KEF28001.1	O-deglycosylation	1	780	1	780	780	97.051	0	1558	100	1716209	278	7633	59.83	89.79	1.97	GUT_GENOME142522	d__Bacteria;p__Actinobacteriota;c__Actinobacteria;o__Actinomycetales;f__Bifidobacteriaceae;g__Bifidobacterium;s__Bifidobacterium adolescentis	ERS1069660	ERP013827	Netherlands	ftp://ftp.ebi.ac.uk/pub/databases/metagenomics/mgnify_genomes/human-gut/v1.0/all_genomes/MGYG-HGUT-023/MGYG-HGUT-02395/genomes5/GUT_GENOME043077.gff.gz	5
GUT_GENOME196362_01209	GUT_GENOME196362_01209	ANI69962.1	O-demethylation	2	257	1	255	257	40.078	2.44e-56	204	94	2952553	484	7638	43.64	82.84	3.74	GUT_GENOME000004	d__Bacteria;p__Firmicutes_A;c__Clostridia;o__Lachnospirales;f__Lachnospiraceae;g__Blautia_A;s__Blautia_A sp900066165	SRS1876348	SRP095580	Netherlands	ftp://ftp.ebi.ac.uk/pub/databases/metagenomics/mgnify_genomes/human-gut/v1.0/all_genomes/MGYG-HGUT-000/MGYG-HGUT-00002/genomes1/GUT_GENOME196362.gff.gz	1
GUT_GENOME197255_00954	GUT_GENOME197255_00954	CCC80442.1	De-rhamnosylation	4	523	3	521	525	43.238	5.57e-152	454	99	2970592	254	16034	43.71	83.28	3.48	GUT_GENOME000004	d__Bacteria;p__Firmicutes_A;c__Clostridia;o__Lachnospirales;f__Lachnospiraceae;g__Blautia_A;s__Blautia_A sp900066165	SRS1876537	SRP095580	Netherlands	ftp://ftp.ebi.ac.uk/pub/databases/metagenomics/mgnify_genomes/human-gut/v1.0/all_genomes/MGYG-HGUT-000/MGYG-HGUT-00002/genomes1/GUT_GENOME197255.gff.gz	1
GUT_GENOME220885_00639	GUT_GENOME220885_00639	KEF28001.1	O-deglycosylation	1	780	1	780	780	97.051	0	1562	100	2346029	78	82798	59.11	100	1.36	GUT_GENOME142522	d__Bacteria;p__Actinobacteriota;c__Actinobacteria;o__Actinomycetales;f__Bifidobacteriaceae;g__Bifidobacterium;s__Bifidobacterium adolescentis	SRS1596812	SRP080787	Mongolia	ftp://ftp.ebi.ac.uk/pub/databases/metagenomics/mgnify_genomes/human-gut/v1.0/all_genomes/MGYG-HGUT-023/MGYG-HGUT-02395/genomes1/GUT_GENOME220885.gff.gz	1
GUT_GENOME221100_01131	GUT_GENOME065112_00554	KEF28001.1	O-deglycosylation	1	780	1	780	780	97.051	0	1556	100	1375414	32	59031	59.8	58.9	0	GUT_GENOME142522	d__Bacteria;p__Actinobacteriota;c__Actinobacteria;o__Actinomycetales;f__Bifidobacteriaceae;g__Bifidobacterium;s__Bifidobacterium adolescentis	ERS608609	ERP008729	Austria	ftp://ftp.ebi.ac.uk/pub/databases/metagenomics/mgnify_genomes/human-gut/v1.0/all_genomes/MGYG-HGUT-023/MGYG-HGUT-02395/genomes2/GUT_GENOME065112.gff.gz	23
GUT_GENOME221358_00513	GUT_GENOME221358_00513	KEF28001.1	O-deglycosylation	1	780	1	780	780	97.051	0	1558	100	2195461	238	16239	59.83	98.45	3.16	GUT_GENOME142522	d__Bacteria;p__Actinobacteriota;c__Actinobacteria;o__Actinomycetales;f__Bifidobacteriaceae;g__Bifidobacterium;s__Bifidobacterium adolescentis	SRS1596832	SRP080787	Mongolia	ftp://ftp.ebi.ac.uk/pub/databases/metagenomics/mgnify_genomes/human-gut/v1.0/all_genomes/MGYG-HGUT-023/MGYG-HGUT-02395/genomes5/GUT_GENOME221358.gff.gz	1
GUT_GENOME221801_00521	GUT_GENOME221801_00521	KEF28001.1	O-deglycosylation	1	780	1	780	780	97.051	0	1556	100	2008275	17	154508	59.82	98.64	0.15	GUT_GENOME142522	d__Bacteria;p__Actinobacteriota;c__Actinobacteria;o__Actinomycetales;f__Bifidobacteriaceae;g__Bifidobacterium;s__Bifidobacterium adolescentis	SRS1596849	SRP080787	China	ftp://ftp.ebi.ac.uk/pub/databases/metagenomics/mgnify_genomes/human-gut/v1.0/all_genomes/MGYG-HGUT-023/MGYG-HGUT-02395/genomes2/GUT_GENOME221801.gff.gz	1
GUT_GENOME229695_01086	GUT_GENOME229695_01086	KEF28001.1	O-deglycosylation	1	780	1	780	780	97.051	0	1556	100	2156066	77	48472	59.08	98.18	1.4	GUT_GENOME142522	d__Bacteria;p__Actinobacteriota;c__Actinobacteria;o__Actinomycetales;f__Bifidobacteriaceae;g__Bifidobacterium;s__Bifidobacterium adolescentis	SRS294945	SRP008047	China	ftp://ftp.ebi.ac.uk/pub/databases/metagenomics/mgnify_genomes/human-gut/v1.0/all_genomes/MGYG-HGUT-023/MGYG-HGUT-02395/genomes5/GUT_GENOME229695.gff.gz	1
GUT_GENOME230271_01557	GUT_GENOME230271_01557	KEF28001.1	O-deglycosylation	1	780	1	780	780	97.051	0	1557	100	1949686	46	58008	59.61	99.09	0	GUT_GENOME142522	d__Bacteria;p__Actinobacteriota;c__Actinobacteria;o__Actinomycetales;f__Bifidobacteriaceae;g__Bifidobacterium;s__Bifidobacterium adolescentis	SRS294980	SRP008047	China	ftp://ftp.ebi.ac.uk/pub/databases/metagenomics/mgnify_genomes/human-gut/v1.0/all_genomes/MGYG-HGUT-023/MGYG-HGUT-02395/genomes4/GUT_GENOME230271.gff.gz	1
GUT_GENOME234129_01862	GUT_GENOME234129_01862	KEF28001.1	O-deglycosylation	1	780	1	780	780	97.051	0	1558	100	2261314	402	10350	60.59	92.38	3.51	GUT_GENOME142522	d__Bacteria;p__Actinobacteriota;c__Actinobacteria;o__Actinomycetales;f__Bifidobacteriaceae;g__Bifidobacterium;s__Bifidobacterium adolescentis	SRS475936	SRP029441	Fiji	ftp://ftp.ebi.ac.uk/pub/databases/metagenomics/mgnify_genomes/human-gut/v1.0/all_genomes/MGYG-HGUT-023/MGYG-HGUT-02395/genomes1/GUT_GENOME234129.gff.gz	1
GUT_GENOME201792_00812	GUT_GENOME201792_00812	ANI69962.1	O-demethylation	2	257	1	255	257	40.078	1.43e-57	204	94	4010758	392	14586	43	87.49	3.37	GUT_GENOME000004	d__Bacteria;p__Firmicutes_A;c__Clostridia;o__Lachnospirales;f__Lachnospiraceae;g__Blautia_A;s__Blautia_A sp900066165	SRS1996016	SRP100518	Spain	ftp://ftp.ebi.ac.uk/pub/databases/metagenomics/mgnify_genomes/human-gut/v1.0/all_genomes/MGYG-HGUT-000/MGYG-HGUT-00002/genomes1/GUT_GENOME201792.gff.gz	1
GUT_GENOME239783_01281	GUT_GENOME239783_01281	KEF28001.1	O-deglycosylation	1	780	1	780	780	97.051	0	1554	100	2150457	21	299387	59.14	100	0	GUT_GENOME142522	d__Bacteria;p__Actinobacteriota;c__Actinobacteria;o__Actinomycetales;f__Bifidobacteriaceae;g__Bifidobacterium;s__Bifidobacterium adolescentis	SAMN09736994	PRJNA482748	China	ftp://ftp.ebi.ac.uk/pub/databases/metagenomics/mgnify_genomes/human-gut/v1.0/all_genomes/MGYG-HGUT-023/MGYG-HGUT-02395/genomes5/GUT_GENOME239783.gff.gz	1
GUT_GENOME201812_00160	GUT_GENOME201812_00160	ANI69962.1	O-demethylation	2	257	1	255	257	40.078	4.2e-56	203	94	3442630	313	15205	43.39	88.11	2.16	GUT_GENOME000004	d__Bacteria;p__Firmicutes_A;c__Clostridia;o__Lachnospirales;f__Lachnospiraceae;g__Blautia_A;s__Blautia_A sp900066165	SRS1996016	SRP100518	Spain	ftp://ftp.ebi.ac.uk/pub/databases/metagenomics/mgnify_genomes/human-gut/v1.0/all_genomes/MGYG-HGUT-000/MGYG-HGUT-00002/genomes1/GUT_GENOME201812.gff.gz	1
GUT_GENOME240299_01025	GUT_GENOME000861_00986	KEF28001.1	O-deglycosylation	1	780	1	780	780	97.051	0	1558	100	2197119	17	512201	59.45	100	0.15	GUT_GENOME142522	d__Bacteria;p__Actinobacteriota;c__Actinobacteria;o__Actinomycetales;f__Bifidobacteriaceae;g__Bifidobacterium;s__Bifidobacterium adolescentis	SAMN09734284	PRJNA482748	China	ftp://ftp.ebi.ac.uk/pub/databases/metagenomics/mgnify_genomes/human-gut/v1.0/all_genomes/MGYG-HGUT-023/MGYG-HGUT-02395/genomes3/GUT_GENOME000861.gff.gz	33
GUT_GENOME240404_01160	GUT_GENOME223002_00450	KEF28001.1	O-deglycosylation	1	780	1	780	780	97.051	0	1556	100	2149993	103	41430	59.65	96.82	3.67	GUT_GENOME142522	d__Bacteria;p__Actinobacteriota;c__Actinobacteria;o__Actinomycetales;f__Bifidobacteriaceae;g__Bifidobacterium;s__Bifidobacterium adolescentis	SRS1719179	SRP090628	Estonia	ftp://ftp.ebi.ac.uk/pub/databases/metagenomics/mgnify_genomes/human-gut/v1.0/all_genomes/MGYG-HGUT-023/MGYG-HGUT-02395/genomes4/GUT_GENOME223002.gff.gz	2
GUT_GENOME204362_00914	GUT_GENOME204362_00914	CCC80442.1	De-rhamnosylation	60	523	17	481	469	46.055	9.57e-147	439	88	1639534	57	44699	43.96	50.32	0	GUT_GENOME000004	d__Bacteria;p__Firmicutes_A;c__Clostridia;o__Lachnospirales;f__Lachnospiraceae;g__Blautia_A;s__Blautia_A sp900066165	SRS1996016	SRP100518	Spain	ftp://ftp.ebi.ac.uk/pub/databases/metagenomics/mgnify_genomes/human-gut/v1.0/all_genomes/MGYG-HGUT-000/MGYG-HGUT-00002/genomes1/GUT_GENOME204362.gff.gz	1
GUT_GENOME251580_00508	GUT_GENOME251580_00508	KEF28001.1	O-deglycosylation	1	780	1	780	780	97.051	0	1558	100	1199251	22	62009	59.97	55.28	0	GUT_GENOME142522	d__Bacteria;p__Actinobacteriota;c__Actinobacteria;o__Actinomycetales;f__Bifidobacteriaceae;g__Bifidobacterium;s__Bifidobacterium adolescentis	ERS746717	ERP010700	United Kingdom	ftp://ftp.ebi.ac.uk/pub/databases/metagenomics/mgnify_genomes/human-gut/v1.0/all_genomes/MGYG-HGUT-023/MGYG-HGUT-02395/genomes2/GUT_GENOME251580.gff.gz	1
GUT_GENOME257165_01101	GUT_GENOME257165_01101	KEF28001.1	O-deglycosylation	1	780	1	780	780	97.051	0	1559	100	1477975	41	72101	59.22	73.9	1.06	GUT_GENOME142522	d__Bacteria;p__Actinobacteriota;c__Actinobacteria;o__Actinomycetales;f__Bifidobacteriaceae;g__Bifidobacterium;s__Bifidobacterium adolescentis	ERS746899	ERP010700	United Kingdom	ftp://ftp.ebi.ac.uk/pub/databases/metagenomics/mgnify_genomes/human-gut/v1.0/all_genomes/MGYG-HGUT-023/MGYG-HGUT-02395/genomes5/GUT_GENOME257165.gff.gz	1
GUT_GENOME211239_00153	GUT_GENOME211239_00153	CCC80442.1	De-rhamnosylation	4	523	3	521	525	43.238	9.69e-152	453	99	3677358	606	7614	43.2	89.49	3.69	GUT_GENOME000004	d__Bacteria;p__Firmicutes_A;c__Clostridia;o__Lachnospirales;f__Lachnospiraceae;g__Blautia_A;s__Blautia_A sp900066165	SRS1905600	SRP096283	United States	ftp://ftp.ebi.ac.uk/pub/databases/metagenomics/mgnify_genomes/human-gut/v1.0/all_genomes/MGYG-HGUT-000/MGYG-HGUT-00002/genomes1/GUT_GENOME211239.gff.gz	1
GUT_GENOME211239_00688	GUT_GENOME211239_00688	CCC80440.1	De-rhamnosylation	9	627	6	672	667	42.279	0	575	95	3677358	606	7614	43.2	89.49	3.69	GUT_GENOME000004	d__Bacteria;p__Firmicutes_A;c__Clostridia;o__Lachnospirales;f__Lachnospiraceae;g__Blautia_A;s__Blautia_A sp900066165	SRS1905600	SRP096283	United States	ftp://ftp.ebi.ac.uk/pub/databases/metagenomics/mgnify_genomes/human-gut/v1.0/all_genomes/MGYG-HGUT-000/MGYG-HGUT-00002/genomes1/GUT_GENOME211239.gff.gz	1
GUT_GENOME259202_00225	GUT_GENOME259202_00225	KEF28001.1	O-deglycosylation	1	780	1	780	780	97.051	0	1556	100	1160229	10	142133	59	55.98	0	GUT_GENOME142522	d__Bacteria;p__Actinobacteriota;c__Actinobacteria;o__Actinomycetales;f__Bifidobacteriaceae;g__Bifidobacterium;s__Bifidobacterium adolescentis	ERS746814	ERP010700	United Kingdom	ftp://ftp.ebi.ac.uk/pub/databases/metagenomics/mgnify_genomes/human-gut/v1.0/all_genomes/MGYG-HGUT-023/MGYG-HGUT-02395/genomes4/GUT_GENOME259202.gff.gz	1
GUT_GENOME269617_00623	GUT_GENOME269617_00623	KEF28001.1	O-deglycosylation	1	780	1	780	780	97.051	0	1559	100	1208273	104	17668	60.09	57.73	0.53	GUT_GENOME142522	d__Bacteria;p__Actinobacteriota;c__Actinobacteria;o__Actinomycetales;f__Bifidobacteriaceae;g__Bifidobacterium;s__Bifidobacterium adolescentis	ERS971912	ERP012929	Israel	ftp://ftp.ebi.ac.uk/pub/databases/metagenomics/mgnify_genomes/human-gut/v1.0/all_genomes/MGYG-HGUT-023/MGYG-HGUT-02395/genomes4/GUT_GENOME269617.gff.gz	1
GUT_GENOME211239_02173	GUT_GENOME003822_00040	QBM20342.1	De-rhamnosylation	1	887	31	917	895	54.749	0	1018	99	2079268	625	3467	43.93	56.73	0.95	GUT_GENOME000004	d__Bacteria;p__Firmicutes_A;c__Clostridia;o__Lachnospirales;f__Lachnospiraceae;g__Blautia_A;s__Blautia_A sp900066165	ERS473162	ERP005989	Sweden	ftp://ftp.ebi.ac.uk/pub/databases/metagenomics/mgnify_genomes/human-gut/v1.0/all_genomes/MGYG-HGUT-000/MGYG-HGUT-00002/genomes1/GUT_GENOME003822.gff.gz	86
GUT_GENOME270364_01471	GUT_GENOME270364_01471	KEF28001.1	O-deglycosylation	1	780	1	780	780	97.051	0	1556	100	1948419	108	25466	59.7	96.84	1.36	GUT_GENOME142522	d__Bacteria;p__Actinobacteriota;c__Actinobacteria;o__Actinomycetales;f__Bifidobacteriaceae;g__Bifidobacterium;s__Bifidobacterium adolescentis	ERS971943	ERP012929	Israel	ftp://ftp.ebi.ac.uk/pub/databases/metagenomics/mgnify_genomes/human-gut/v1.0/all_genomes/MGYG-HGUT-023/MGYG-HGUT-02395/genomes1/GUT_GENOME270364.gff.gz	1
GUT_GENOME213839_00137	GUT_GENOME213839_00137	CCC80442.1	De-rhamnosylation	4	523	3	521	525	43.238	1.78e-151	452	99	2146187	558	4239	43.75	63.5	1.32	GUT_GENOME000004	d__Bacteria;p__Firmicutes_A;c__Clostridia;o__Lachnospirales;f__Lachnospiraceae;g__Blautia_A;s__Blautia_A sp900066165	SRS015578	SRP175119	United States	ftp://ftp.ebi.ac.uk/pub/databases/metagenomics/mgnify_genomes/human-gut/v1.0/all_genomes/MGYG-HGUT-000/MGYG-HGUT-00002/genomes1/GUT_GENOME213839.gff.gz	1
GUT_GENOME277392_01349	GUT_GENOME277392_01349	KEF28001.1	O-deglycosylation	1	780	1	780	780	97.051	0	1556	100	2050382	113	28753	59.71	99	0.41	GUT_GENOME142522	d__Bacteria;p__Actinobacteriota;c__Actinobacteria;o__Actinomycetales;f__Bifidobacteriaceae;g__Bifidobacterium;s__Bifidobacterium adolescentis	ERS971702	ERP012929	Israel	ftp://ftp.ebi.ac.uk/pub/databases/metagenomics/mgnify_genomes/human-gut/v1.0/all_genomes/MGYG-HGUT-023/MGYG-HGUT-02395/genomes5/GUT_GENOME277392.gff.gz	1
GUT_GENOME278113_01355	GUT_GENOME278113_01355	KEF28001.1	O-deglycosylation	1	780	1	780	780	97.051	0	1555	100	1879512	143	24082	59.8	98.11	0.15	GUT_GENOME142522	d__Bacteria;p__Actinobacteriota;c__Actinobacteria;o__Actinomycetales;f__Bifidobacteriaceae;g__Bifidobacterium;s__Bifidobacterium adolescentis	ERS972328	ERP012929	Israel	ftp://ftp.ebi.ac.uk/pub/databases/metagenomics/mgnify_genomes/human-gut/v1.0/all_genomes/MGYG-HGUT-023/MGYG-HGUT-02395/genomes4/GUT_GENOME278113.gff.gz	1
GUT_GENOME218655_01533	GUT_GENOME218655_01533	CCC80442.1	De-rhamnosylation	28	524	23	514	502	41.633	5.05e-134	408	95	2478340	469	7614	44.22	64.19	2.02	GUT_GENOME000004	d__Bacteria;p__Firmicutes_A;c__Clostridia;o__Lachnospirales;f__Lachnospiraceae;g__Blautia_A;s__Blautia_A sp900066165	SRS1170839	SRP066479	Peru	ftp://ftp.ebi.ac.uk/pub/databases/metagenomics/mgnify_genomes/human-gut/v1.0/all_genomes/MGYG-HGUT-000/MGYG-HGUT-00002/genomes1/GUT_GENOME218655.gff.gz	1
GUT_GENOME218655_01624	GUT_GENOME218655_01624	QBM20342.1	De-rhamnosylation	1	887	1	887	895	54.637	0	1015	99	2478340	469	7614	44.22	64.19	2.02	GUT_GENOME000004	d__Bacteria;p__Firmicutes_A;c__Clostridia;o__Lachnospirales;f__Lachnospiraceae;g__Blautia_A;s__Blautia_A sp900066165	SRS1170839	SRP066479	Peru	ftp://ftp.ebi.ac.uk/pub/databases/metagenomics/mgnify_genomes/human-gut/v1.0/all_genomes/MGYG-HGUT-000/MGYG-HGUT-00002/genomes1/GUT_GENOME218655.gff.gz	2
GUT_GENOME030956_01456	GUT_GENOME030956_01456	KEF28010.1	O-deglycosylation	1	748	1	748	748	96.925	0	1506	100	1771483	149	17727	59.99	80.07	4.3	GUT_GENOME142522	d__Bacteria;p__Actinobacteriota;c__Actinobacteria;o__Actinomycetales;f__Bifidobacteriaceae;g__Bifidobacterium;s__Bifidobacterium adolescentis	ERS848710	ERP012177	China	ftp://ftp.ebi.ac.uk/pub/databases/metagenomics/mgnify_genomes/human-gut/v1.0/all_genomes/MGYG-HGUT-023/MGYG-HGUT-02395/genomes5/GUT_GENOME030956.gff.gz	1
GUT_GENOME003698_00277	GUT_GENOME003698_00277	KEF28001.1	O-deglycosylation	1	780	1	780	780	96.923	0	1556	100	1808449	236	10511	59.52	86.63	2.05	GUT_GENOME142522	d__Bacteria;p__Actinobacteriota;c__Actinobacteria;o__Actinomycetales;f__Bifidobacteriaceae;g__Bifidobacterium;s__Bifidobacterium adolescentis	ERS473152	ERP005989	Sweden	ftp://ftp.ebi.ac.uk/pub/databases/metagenomics/mgnify_genomes/human-gut/v1.0/all_genomes/MGYG-HGUT-023/MGYG-HGUT-02395/genomes2/GUT_GENOME003698.gff.gz	3
GUT_GENOME004706_00682	GUT_GENOME004706_00682	KEF28001.1	O-deglycosylation	1	780	1	780	780	96.923	0	1556	100	1877978	321	7695	59.8	91.15	2.08	GUT_GENOME142522	d__Bacteria;p__Actinobacteriota;c__Actinobacteria;o__Actinomycetales;f__Bifidobacteriaceae;g__Bifidobacterium;s__Bifidobacterium adolescentis	ERS473228	ERP005989	Sweden	ftp://ftp.ebi.ac.uk/pub/databases/metagenomics/mgnify_genomes/human-gut/v1.0/all_genomes/MGYG-HGUT-023/MGYG-HGUT-02395/genomes3/GUT_GENOME004706.gff.gz	1
GUT_GENOME219425_01994	GUT_GENOME219425_01994	CCC80442.1	De-rhamnosylation	4	523	3	521	525	43.238	9.69e-152	453	99	3850261	404	13125	42.89	92.51	3.72	GUT_GENOME000004	d__Bacteria;p__Firmicutes_A;c__Clostridia;o__Lachnospirales;f__Lachnospiraceae;g__Blautia_A;s__Blautia_A sp900066165	SRS146813	SRP002163	United States	ftp://ftp.ebi.ac.uk/pub/databases/metagenomics/mgnify_genomes/human-gut/v1.0/all_genomes/MGYG-HGUT-000/MGYG-HGUT-00002/genomes1/GUT_GENOME219425.gff.gz	1
GUT_GENOME022066_00387	GUT_GENOME022066_00387	KEF28001.1	O-deglycosylation	1	780	1	780	780	96.923	0	1556	100	1478786	31	85521	59.79	76.52	0.55	GUT_GENOME142522	d__Bacteria;p__Actinobacteriota;c__Actinobacteria;o__Actinomycetales;f__Bifidobacteriaceae;g__Bifidobacterium;s__Bifidobacterium adolescentis	ERS1444467	ERP019502	Kazakhstan	ftp://ftp.ebi.ac.uk/pub/databases/metagenomics/mgnify_genomes/human-gut/v1.0/all_genomes/MGYG-HGUT-023/MGYG-HGUT-02395/genomes4/GUT_GENOME022066.gff.gz	1
GUT_GENOME222919_00226	GUT_GENOME063147_02627	QBM20342.1	De-rhamnosylation	1	887	1	879	888	53.604	0	1011	99	4470839	202	38128	42.65	91.76	5	GUT_GENOME000004	d__Bacteria;p__Firmicutes_A;c__Clostridia;o__Lachnospirales;f__Lachnospiraceae;g__Blautia_A;s__Blautia_A sp900066165	ERS537183	ERP006678	China	ftp://ftp.ebi.ac.uk/pub/databases/metagenomics/mgnify_genomes/human-gut/v1.0/all_genomes/MGYG-HGUT-000/MGYG-HGUT-00002/genomes1/GUT_GENOME063147.gff.gz	1
GUT_GENOME024594_01188	GUT_GENOME024594_01188	KEF28001.1	O-deglycosylation	1	780	1	780	780	96.923	0	1555	100	1484867	14	235766	59.34	81.8	0.45	GUT_GENOME142522	d__Bacteria;p__Actinobacteriota;c__Actinobacteria;o__Actinomycetales;f__Bifidobacteriaceae;g__Bifidobacterium;s__Bifidobacterium adolescentis	ERS1444551	ERP019502	Kazakhstan	ftp://ftp.ebi.ac.uk/pub/databases/metagenomics/mgnify_genomes/human-gut/v1.0/all_genomes/MGYG-HGUT-023/MGYG-HGUT-02395/genomes1/GUT_GENOME024594.gff.gz	1
GUT_GENOME223323_00946	GUT_GENOME170187_01163	QBM20340.1	De-rhamnosylation	1	828	1	836	853	42.79	0	640	99	3240695	409	10418	43.4	83.62	3.4	GUT_GENOME000004	d__Bacteria;p__Firmicutes_A;c__Clostridia;o__Lachnospirales;f__Lachnospiraceae;g__Blautia_A;s__Blautia_A sp900066165	SRS820593	SRP052307	United States	ftp://ftp.ebi.ac.uk/pub/databases/metagenomics/mgnify_genomes/human-gut/v1.0/all_genomes/MGYG-HGUT-000/MGYG-HGUT-00002/genomes1/GUT_GENOME170187.gff.gz	3
GUT_GENOME223556_01060	GUT_GENOME253830_01527	BBG22493.1	C-deglyc (PUE)	1	367	1	357	367	51.771	2.89e-131	389	100	3994685	478	12311	42.85	91.63	3.8	GUT_GENOME000004	d__Bacteria;p__Firmicutes_A;c__Clostridia;o__Lachnospirales;f__Lachnospiraceae;g__Blautia_A;s__Blautia_A sp900066165	ERS746891	ERP010700	United Kingdom	ftp://ftp.ebi.ac.uk/pub/databases/metagenomics/mgnify_genomes/human-gut/v1.0/all_genomes/MGYG-HGUT-000/MGYG-HGUT-00002/genomes1/GUT_GENOME253830.gff.gz	1
GUT_GENOME025361_00785	GUT_GENOME025361_00785	KEF28001.1	O-deglycosylation	1	780	1	780	780	96.923	0	1557	100	1102616	12	153813	58.8	55.68	0	GUT_GENOME142522	d__Bacteria;p__Actinobacteriota;c__Actinobacteria;o__Actinomycetales;f__Bifidobacteriaceae;g__Bifidobacterium;s__Bifidobacterium adolescentis	ERS1444577	ERP019502	Kazakhstan	ftp://ftp.ebi.ac.uk/pub/databases/metagenomics/mgnify_genomes/human-gut/v1.0/all_genomes/MGYG-HGUT-023/MGYG-HGUT-02395/genomes5/GUT_GENOME025361.gff.gz	1
GUT_GENOME048888_01179	GUT_GENOME048888_01179	KEF28001.1	O-deglycosylation	1	780	1	780	780	96.923	0	1557	100	1997210	36	87289	59.96	98.86	0.45	GUT_GENOME142522	d__Bacteria;p__Actinobacteriota;c__Actinobacteria;o__Actinomycetales;f__Bifidobacteriaceae;g__Bifidobacterium;s__Bifidobacterium adolescentis	ERS1647294	ERP019674	Germany	ftp://ftp.ebi.ac.uk/pub/databases/metagenomics/mgnify_genomes/human-gut/v1.0/all_genomes/MGYG-HGUT-023/MGYG-HGUT-02395/genomes1/GUT_GENOME048888.gff.gz	1
GUT_GENOME048897_00932	GUT_GENOME048897_00932	KEF28001.1	O-deglycosylation	1	780	1	780	780	96.923	0	1557	100	1986880	52	68986	59.99	98.85	0	GUT_GENOME142522	d__Bacteria;p__Actinobacteriota;c__Actinobacteria;o__Actinomycetales;f__Bifidobacteriaceae;g__Bifidobacterium;s__Bifidobacterium adolescentis	ERS1647294	ERP019674	Germany	ftp://ftp.ebi.ac.uk/pub/databases/metagenomics/mgnify_genomes/human-gut/v1.0/all_genomes/MGYG-HGUT-023/MGYG-HGUT-02395/genomes1/GUT_GENOME048897.gff.gz	1
GUT_GENOME048906_01604	GUT_GENOME048906_01604	KEF28001.1	O-deglycosylation	1	780	1	780	780	96.923	0	1557	100	1998296	32	86843	59.88	98.41	0.24	GUT_GENOME142522	d__Bacteria;p__Actinobacteriota;c__Actinobacteria;o__Actinomycetales;f__Bifidobacteriaceae;g__Bifidobacterium;s__Bifidobacterium adolescentis	ERS1647294	ERP019674	Germany	ftp://ftp.ebi.ac.uk/pub/databases/metagenomics/mgnify_genomes/human-gut/v1.0/all_genomes/MGYG-HGUT-023/MGYG-HGUT-02395/genomes3/GUT_GENOME048906.gff.gz	1
GUT_GENOME048912_01039	GUT_GENOME048912_01039	KEF28001.1	O-deglycosylation	1	780	1	780	780	96.923	0	1557	100	1924406	79	45914	60.01	96.89	0	GUT_GENOME142522	d__Bacteria;p__Actinobacteriota;c__Actinobacteria;o__Actinomycetales;f__Bifidobacteriaceae;g__Bifidobacterium;s__Bifidobacterium adolescentis	ERS1647294	ERP019674	Germany	ftp://ftp.ebi.ac.uk/pub/databases/metagenomics/mgnify_genomes/human-gut/v1.0/all_genomes/MGYG-HGUT-023/MGYG-HGUT-02395/genomes4/GUT_GENOME048912.gff.gz	1
GUT_GENOME060673_00870	GUT_GENOME060673_00870	KEF28001.1	O-deglycosylation	1	780	1	780	780	96.923	0	1556	100	1898430	184	14227	59.71	92.05	2.36	GUT_GENOME142522	d__Bacteria;p__Actinobacteriota;c__Actinobacteria;o__Actinomycetales;f__Bifidobacteriaceae;g__Bifidobacterium;s__Bifidobacterium adolescentis	ERS473228	ERP005989	Denmark	ftp://ftp.ebi.ac.uk/pub/databases/metagenomics/mgnify_genomes/human-gut/v1.0/all_genomes/MGYG-HGUT-023/MGYG-HGUT-02395/genomes1/GUT_GENOME060673.gff.gz	1
GUT_GENOME061764_00248	GUT_GENOME005966_00274	KEF28001.1	O-deglycosylation	1	780	1	780	780	96.923	0	1554	100	1904978	216	13386	59.66	90.7	1.29	GUT_GENOME142522	d__Bacteria;p__Actinobacteriota;c__Actinobacteria;o__Actinomycetales;f__Bifidobacteriaceae;g__Bifidobacterium;s__Bifidobacterium adolescentis	ERS473320	ERP005989	Sweden	ftp://ftp.ebi.ac.uk/pub/databases/metagenomics/mgnify_genomes/human-gut/v1.0/all_genomes/MGYG-HGUT-023/MGYG-HGUT-02395/genomes3/GUT_GENOME005966.gff.gz	3
GUT_GENOME062289_00779	GUT_GENOME006569_00742	KEF28001.1	O-deglycosylation	1	780	1	780	780	96.923	0	1556	100	1973180	96	32217	59.51	91.17	0	GUT_GENOME142522	d__Bacteria;p__Actinobacteriota;c__Actinobacteria;o__Actinomycetales;f__Bifidobacteriaceae;g__Bifidobacterium;s__Bifidobacterium adolescentis	ERS473364	ERP005989	Sweden	ftp://ftp.ebi.ac.uk/pub/databases/metagenomics/mgnify_genomes/human-gut/v1.0/all_genomes/MGYG-HGUT-023/MGYG-HGUT-02395/genomes3/GUT_GENOME006569.gff.gz	3
GUT_GENOME066173_01374	GUT_GENOME066173_01374	KEF28001.1	O-deglycosylation	1	780	1	780	780	96.923	0	1555	100	2152976	306	9153	58.09	86.87	1.82	GUT_GENOME142522	d__Bacteria;p__Actinobacteriota;c__Actinobacteria;o__Actinomycetales;f__Bifidobacteriaceae;g__Bifidobacterium;s__Bifidobacterium adolescentis	ERS235496	ERP002469	Sweden	ftp://ftp.ebi.ac.uk/pub/databases/metagenomics/mgnify_genomes/human-gut/v1.0/all_genomes/MGYG-HGUT-023/MGYG-HGUT-02395/genomes3/GUT_GENOME066173.gff.gz	1
GUT_GENOME071461_00036	GUT_GENOME071461_00036	KEF28001.1	O-deglycosylation	1	780	1	780	780	96.923	0	1556	100	1481267	665	2346	58.98	59.07	1	GUT_GENOME142522	d__Bacteria;p__Actinobacteriota;c__Actinobacteria;o__Actinomycetales;f__Bifidobacteriaceae;g__Bifidobacterium;s__Bifidobacterium adolescentis	ERS396392	ERP004605	Denmark	ftp://ftp.ebi.ac.uk/pub/databases/metagenomics/mgnify_genomes/human-gut/v1.0/all_genomes/MGYG-HGUT-023/MGYG-HGUT-02395/genomes2/GUT_GENOME071461.gff.gz	1
GUT_GENOME073898_00770	GUT_GENOME073898_00770	KEF28001.1	O-deglycosylation	1	780	1	780	780	96.923	0	1554	100	2075841	98	34411	59.6	99.09	0.91	GUT_GENOME142522	d__Bacteria;p__Actinobacteriota;c__Actinobacteria;o__Actinomycetales;f__Bifidobacteriaceae;g__Bifidobacterium;s__Bifidobacterium adolescentis	ERS396489	ERP004605	Spain	ftp://ftp.ebi.ac.uk/pub/databases/metagenomics/mgnify_genomes/human-gut/v1.0/all_genomes/MGYG-HGUT-023/MGYG-HGUT-02395/genomes3/GUT_GENOME073898.gff.gz	1
GUT_GENOME078062_01792	GUT_GENOME078062_01792	KEF28001.1	O-deglycosylation	1	780	1	780	780	96.923	0	1556	100	2085151	401	8822	59.9	96.86	4.75	GUT_GENOME142522	d__Bacteria;p__Actinobacteriota;c__Actinobacteria;o__Actinomycetales;f__Bifidobacteriaceae;g__Bifidobacterium;s__Bifidobacterium adolescentis	ERS473228	ERP005989	Sweden	ftp://ftp.ebi.ac.uk/pub/databases/metagenomics/mgnify_genomes/human-gut/v1.0/all_genomes/MGYG-HGUT-023/MGYG-HGUT-02395/genomes1/GUT_GENOME078062.gff.gz	1
GUT_GENOME233618_01071	GUT_GENOME233618_01071	CCC80442.1	De-rhamnosylation	4	523	3	521	525	43.238	3.31e-151	452	99	2902510	314	15512	43.67	82.83	3.8	GUT_GENOME000004	d__Bacteria;p__Firmicutes_A;c__Clostridia;o__Lachnospirales;f__Lachnospiraceae;g__Blautia_A;s__Blautia_A sp900066165	SRS475690	SRP029441	Fiji	ftp://ftp.ebi.ac.uk/pub/databases/metagenomics/mgnify_genomes/human-gut/v1.0/all_genomes/MGYG-HGUT-000/MGYG-HGUT-00002/genomes1/GUT_GENOME233618.gff.gz	1
GUT_GENOME088279_00895	GUT_GENOME088279_00895	KEF28001.1	O-deglycosylation	1	780	1	780	780	96.923	0	1557	100	2287441	52	114764	59.59	99.7	1.53	GUT_GENOME142522	d__Bacteria;p__Actinobacteriota;c__Actinobacteria;o__Actinomycetales;f__Bifidobacteriaceae;g__Bifidobacterium;s__Bifidobacterium adolescentis	ERS608530	ERP008729	Austria	ftp://ftp.ebi.ac.uk/pub/databases/metagenomics/mgnify_genomes/human-gut/v1.0/all_genomes/MGYG-HGUT-023/MGYG-HGUT-02395/genomes5/GUT_GENOME088279.gff.gz	1
GUT_GENOME092230_01086	GUT_GENOME092230_01086	KEF28001.1	O-deglycosylation	1	780	1	780	780	96.923	0	1557	100	1324485	9	274818	59.29	55.83	0.98	GUT_GENOME142522	d__Bacteria;p__Actinobacteriota;c__Actinobacteria;o__Actinomycetales;f__Bifidobacteriaceae;g__Bifidobacterium;s__Bifidobacterium adolescentis	ERS608530	ERP008729	Austria	ftp://ftp.ebi.ac.uk/pub/databases/metagenomics/mgnify_genomes/human-gut/v1.0/all_genomes/MGYG-HGUT-023/MGYG-HGUT-02395/genomes3/GUT_GENOME092230.gff.gz	1
GUT_GENOME096478_01341	GUT_GENOME164087_01213	KEF28001.1	O-deglycosylation	1	780	1	780	780	96.923	0	1555	100	1671204	169	18463	60.01	91.15	1.06	GUT_GENOME142522	d__Bacteria;p__Actinobacteriota;c__Actinobacteria;o__Actinomycetales;f__Bifidobacteriaceae;g__Bifidobacterium;s__Bifidobacterium adolescentis	SRS1876319	SRP095580	Netherlands	ftp://ftp.ebi.ac.uk/pub/databases/metagenomics/mgnify_genomes/human-gut/v1.0/all_genomes/MGYG-HGUT-023/MGYG-HGUT-02395/genomes4/GUT_GENOME164087.gff.gz	1
GUT_GENOME116613_00351	GUT_GENOME116613_00351	KEF28001.1	O-deglycosylation	1	780	1	780	780	96.923	0	1557	100	1965976	120	26230	59.41	96.83	0.38	GUT_GENOME142522	d__Bacteria;p__Actinobacteriota;c__Actinobacteria;o__Actinomycetales;f__Bifidobacteriaceae;g__Bifidobacterium;s__Bifidobacterium adolescentis	ERS396352	ERP004605	Denmark	ftp://ftp.ebi.ac.uk/pub/databases/metagenomics/mgnify_genomes/human-gut/v1.0/all_genomes/MGYG-HGUT-023/MGYG-HGUT-02395/genomes2/GUT_GENOME116613.gff.gz	1
GUT_GENOME118900_00357	GUT_GENOME051955_00346	KEF28001.1	O-deglycosylation	1	780	1	780	780	96.923	0	1555	100	1766450	259	8095	59.34	82.41	4.85	GUT_GENOME142522	d__Bacteria;p__Actinobacteriota;c__Actinobacteria;o__Actinomycetales;f__Bifidobacteriaceae;g__Bifidobacterium;s__Bifidobacterium adolescentis	ERS199209	ERP002061	Spain	ftp://ftp.ebi.ac.uk/pub/databases/metagenomics/mgnify_genomes/human-gut/v1.0/all_genomes/MGYG-HGUT-023/MGYG-HGUT-02395/genomes3/GUT_GENOME051955.gff.gz	8
GUT_GENOME240451_01596	GUT_GENOME240451_01596	CCC80442.1	De-rhamnosylation	4	523	3	521	525	43.238	1.78e-151	452	99	3873107	507	10636	43	96.94	2.43	GUT_GENOME000004	d__Bacteria;p__Firmicutes_A;c__Clostridia;o__Lachnospirales;f__Lachnospiraceae;g__Blautia_A;s__Blautia_A sp900066165	SRS1719191	SRP090628	Finland	ftp://ftp.ebi.ac.uk/pub/databases/metagenomics/mgnify_genomes/human-gut/v1.0/all_genomes/MGYG-HGUT-000/MGYG-HGUT-00002/genomes1/GUT_GENOME240451.gff.gz	1
GUT_GENOME120684_00420	GUT_GENOME120684_00420	KEF28001.1	O-deglycosylation	1	780	1	780	780	96.923	0	1554	100	1048723	25	61658	58.71	54.39	0	GUT_GENOME142522	d__Bacteria;p__Actinobacteriota;c__Actinobacteria;o__Actinomycetales;f__Bifidobacteriaceae;g__Bifidobacterium;s__Bifidobacterium adolescentis	ERS396489	ERP004605	Spain	ftp://ftp.ebi.ac.uk/pub/databases/metagenomics/mgnify_genomes/human-gut/v1.0/all_genomes/MGYG-HGUT-023/MGYG-HGUT-02395/genomes2/GUT_GENOME120684.gff.gz	1
GUT_GENOME242659_01085	GUT_GENOME000004_00742	ANI69962.1	O-demethylation	2	257	1	255	257	40.078	5.16e-56	203	94	4434075	100	109266	42.6	99.37	0	GUT_GENOME000004	d__Bacteria;p__Firmicutes_A;c__Clostridia;o__Lachnospirales;f__Lachnospiraceae;g__Blautia_A;s__Blautia_A sp900066165	ERS370064	ERP105624	United Kingdom	ftp://ftp.ebi.ac.uk/pub/databases/metagenomics/mgnify_genomes/human-gut/v1.0/all_genomes/MGYG-HGUT-000/MGYG-HGUT-00002/genomes1/GUT_GENOME000004.gff.gz	17
GUT_GENOME242659_01411	GUT_GENOME184126_01369	QBM20342.1	De-rhamnosylation	1	887	1	887	895	54.413	0	1013	99	3634346	548	8690	42.81	93.77	2.85	GUT_GENOME000004	d__Bacteria;p__Firmicutes_A;c__Clostridia;o__Lachnospirales;f__Lachnospiraceae;g__Blautia_A;s__Blautia_A sp900066165	SRS1735564	SRP090628	Finland	ftp://ftp.ebi.ac.uk/pub/databases/metagenomics/mgnify_genomes/human-gut/v1.0/all_genomes/MGYG-HGUT-000/MGYG-HGUT-00002/genomes1/GUT_GENOME184126.gff.gz	4
GUT_GENOME129412_00537	GUT_GENOME129412_00537	KEF28001.1	O-deglycosylation	1	780	1	780	780	96.923	0	1555	100	1554653	310	6411	60.5	84.91	0.91	GUT_GENOME142522	d__Bacteria;p__Actinobacteriota;c__Actinobacteria;o__Actinomycetales;f__Bifidobacteriaceae;g__Bifidobacterium;s__Bifidobacterium adolescentis	SRS1596867	SRP080787	Mongolia	ftp://ftp.ebi.ac.uk/pub/databases/metagenomics/mgnify_genomes/human-gut/v1.0/all_genomes/MGYG-HGUT-023/MGYG-HGUT-02395/genomes5/GUT_GENOME129412.gff.gz	1
GUT_GENOME242659_02027	GUT_GENOME242659_02027	CCC80442.1	De-rhamnosylation	4	523	3	521	525	43.238	1.78e-151	452	99	3817638	619	8357	42.8	95.03	2.85	GUT_GENOME000004	d__Bacteria;p__Firmicutes_A;c__Clostridia;o__Lachnospirales;f__Lachnospiraceae;g__Blautia_A;s__Blautia_A sp900066165	SRS1735564	SRP090628	Finland	ftp://ftp.ebi.ac.uk/pub/databases/metagenomics/mgnify_genomes/human-gut/v1.0/all_genomes/MGYG-HGUT-000/MGYG-HGUT-00002/genomes1/GUT_GENOME242659.gff.gz	1
GUT_GENOME243187_00434	GUT_GENOME243187_00434	QBM20342.1	De-rhamnosylation	1	887	1	887	895	54.972	0	1019	99	4175320	297	22546	42.64	96.2	0	GUT_GENOME000004	d__Bacteria;p__Firmicutes_A;c__Clostridia;o__Lachnospirales;f__Lachnospiraceae;g__Blautia_A;s__Blautia_A sp900066165	SRS1101442	SRP064400	Canada	ftp://ftp.ebi.ac.uk/pub/databases/metagenomics/mgnify_genomes/human-gut/v1.0/all_genomes/MGYG-HGUT-000/MGYG-HGUT-00002/genomes1/GUT_GENOME243187.gff.gz	1
GUT_GENOME243187_02134	GUT_GENOME243187_02134	CCC80442.1	De-rhamnosylation	4	523	3	521	525	43.238	9.69e-152	453	99	4175320	297	22546	42.64	96.2	0	GUT_GENOME000004	d__Bacteria;p__Firmicutes_A;c__Clostridia;o__Lachnospirales;f__Lachnospiraceae;g__Blautia_A;s__Blautia_A sp900066165	SRS1101442	SRP064400	Canada	ftp://ftp.ebi.ac.uk/pub/databases/metagenomics/mgnify_genomes/human-gut/v1.0/all_genomes/MGYG-HGUT-000/MGYG-HGUT-00002/genomes1/GUT_GENOME243187.gff.gz	1
GUT_GENOME129857_00005	GUT_GENOME129857_00005	KEF28001.1	O-deglycosylation	1	780	1	780	780	96.923	0	1557	100	1605607	348	5583	60	78.27	1.36	GUT_GENOME142522	d__Bacteria;p__Actinobacteriota;c__Actinobacteria;o__Actinomycetales;f__Bifidobacteriaceae;g__Bifidobacterium;s__Bifidobacterium adolescentis	ERS234291	ERP001956	Germany	ftp://ftp.ebi.ac.uk/pub/databases/metagenomics/mgnify_genomes/human-gut/v1.0/all_genomes/MGYG-HGUT-023/MGYG-HGUT-02395/genomes1/GUT_GENOME129857.gff.gz	1
GUT_GENOME245127_00035	GUT_GENOME245127_00035	CCC80442.1	De-rhamnosylation	4	523	3	521	525	43.238	1.78e-151	452	99	3002210	299	15512	43.62	84.44	0.95	GUT_GENOME000004	d__Bacteria;p__Firmicutes_A;c__Clostridia;o__Lachnospirales;f__Lachnospiraceae;g__Blautia_A;s__Blautia_A sp900066165	ERS1066637	ERP013933	United States	ftp://ftp.ebi.ac.uk/pub/databases/metagenomics/mgnify_genomes/human-gut/v1.0/all_genomes/MGYG-HGUT-000/MGYG-HGUT-00002/genomes1/GUT_GENOME245127.gff.gz	1
GUT_GENOME130083_00502	GUT_GENOME130083_00502	KEF28001.1	O-deglycosylation	1	780	1	780	780	96.923	0	1557	100	1063027	23	74321	58.77	52.63	0	GUT_GENOME142522	d__Bacteria;p__Actinobacteriota;c__Actinobacteria;o__Actinomycetales;f__Bifidobacteriaceae;g__Bifidobacterium;s__Bifidobacterium adolescentis	SRS1994023	SRP100446	United States	ftp://ftp.ebi.ac.uk/pub/databases/metagenomics/mgnify_genomes/human-gut/v1.0/all_genomes/MGYG-HGUT-023/MGYG-HGUT-02395/genomes3/GUT_GENOME130083.gff.gz	1
GUT_GENOME131094_01724	GUT_GENOME131094_01724	KEF28001.1	O-deglycosylation	1	780	1	780	780	96.923	0	1557	100	2176621	57	61546	59.66	99.09	0.53	GUT_GENOME142522	d__Bacteria;p__Actinobacteriota;c__Actinobacteria;o__Actinomycetales;f__Bifidobacteriaceae;g__Bifidobacterium;s__Bifidobacterium adolescentis	SRS1993526	SRP100446	United States	ftp://ftp.ebi.ac.uk/pub/databases/metagenomics/mgnify_genomes/human-gut/v1.0/all_genomes/MGYG-HGUT-023/MGYG-HGUT-02395/genomes2/GUT_GENOME131094.gff.gz	1
GUT_GENOME246519_00184	GUT_GENOME246519_00184	CCC80442.1	De-rhamnosylation	4	523	3	521	525	43.048	9.28e-150	448	99	2625123	352	10852	43.86	73.81	0.71	GUT_GENOME000004	d__Bacteria;p__Firmicutes_A;c__Clostridia;o__Lachnospirales;f__Lachnospiraceae;g__Blautia_A;s__Blautia_A sp900066165	ERS1066652	ERP013933	United States	ftp://ftp.ebi.ac.uk/pub/databases/metagenomics/mgnify_genomes/human-gut/v1.0/all_genomes/MGYG-HGUT-000/MGYG-HGUT-00002/genomes1/GUT_GENOME246519.gff.gz	1
GUT_GENOME246519_00231	GUT_GENOME246519_00231	QBM20342.1	De-rhamnosylation	1	887	1	887	895	54.637	0	1016	99	2625123	352	10852	43.86	73.81	0.71	GUT_GENOME000004	d__Bacteria;p__Firmicutes_A;c__Clostridia;o__Lachnospirales;f__Lachnospiraceae;g__Blautia_A;s__Blautia_A sp900066165	ERS1066652	ERP013933	United States	ftp://ftp.ebi.ac.uk/pub/databases/metagenomics/mgnify_genomes/human-gut/v1.0/all_genomes/MGYG-HGUT-000/MGYG-HGUT-00002/genomes1/GUT_GENOME246519.gff.gz	1
GUT_GENOME131892_01547	GUT_GENOME131892_01547	KEF28001.1	O-deglycosylation	1	780	1	780	780	96.923	0	1554	100	1899557	103	29609	59.82	98.98	0.65	GUT_GENOME142522	d__Bacteria;p__Actinobacteriota;c__Actinobacteria;o__Actinomycetales;f__Bifidobacteriaceae;g__Bifidobacterium;s__Bifidobacterium adolescentis	NA	NA	Germany	ftp://ftp.ebi.ac.uk/pub/databases/metagenomics/mgnify_genomes/human-gut/v1.0/all_genomes/MGYG-HGUT-023/MGYG-HGUT-02395/genomes3/GUT_GENOME131892.gff.gz	2
GUT_GENOME247173_01579	GUT_GENOME247173_01579	CCC80442.1	De-rhamnosylation	4	523	3	521	525	43.238	9.69e-152	453	99	3151068	377	11851	43.64	88.9	2.93	GUT_GENOME000004	d__Bacteria;p__Firmicutes_A;c__Clostridia;o__Lachnospirales;f__Lachnospiraceae;g__Blautia_A;s__Blautia_A sp900066165	ERS1066726	ERP013933	United States	ftp://ftp.ebi.ac.uk/pub/databases/metagenomics/mgnify_genomes/human-gut/v1.0/all_genomes/MGYG-HGUT-000/MGYG-HGUT-00002/genomes1/GUT_GENOME247173.gff.gz	1
GUT_GENOME142515_01789	GUT_GENOME142515_01789	KEF28001.1	O-deglycosylation	1	780	1	780	780	96.923	0	1556	100	2598653	11	1843893	59.06	100	1.21	GUT_GENOME142522	d__Bacteria;p__Actinobacteriota;c__Actinobacteria;o__Actinomycetales;f__Bifidobacteriaceae;g__Bifidobacterium;s__Bifidobacterium adolescentis	SAMN04231310	PRJNA300965	Italy	ftp://ftp.ebi.ac.uk/pub/databases/metagenomics/mgnify_genomes/human-gut/v1.0/all_genomes/MGYG-HGUT-023/MGYG-HGUT-02395/genomes3/GUT_GENOME142515.gff.gz	1
GUT_GENOME160258_00256	GUT_GENOME160258_00256	KEF28001.1	O-deglycosylation	1	780	1	780	780	96.923	0	1554	100	1280341	101	22757	59.75	66.58	0.45	GUT_GENOME142522	d__Bacteria;p__Actinobacteriota;c__Actinobacteria;o__Actinomycetales;f__Bifidobacteriaceae;g__Bifidobacterium;s__Bifidobacterium adolescentis	SRS1876476	SRP095580	Netherlands	ftp://ftp.ebi.ac.uk/pub/databases/metagenomics/mgnify_genomes/human-gut/v1.0/all_genomes/MGYG-HGUT-023/MGYG-HGUT-02395/genomes4/GUT_GENOME160258.gff.gz	1
GUT_GENOME250444_00175	GUT_GENOME250444_00175	ANI69962.1	O-demethylation	2	257	1	255	257	40.078	5.37e-56	203	94	2936746	659	5438	44	81.16	0.95	GUT_GENOME000004	d__Bacteria;p__Firmicutes_A;c__Clostridia;o__Lachnospirales;f__Lachnospiraceae;g__Blautia_A;s__Blautia_A sp900066165	SRS1846824	SRP094805	China	ftp://ftp.ebi.ac.uk/pub/databases/metagenomics/mgnify_genomes/human-gut/v1.0/all_genomes/MGYG-HGUT-000/MGYG-HGUT-00002/genomes1/GUT_GENOME250444.gff.gz	1
GUT_GENOME162208_00351	GUT_GENOME162208_00351	KEF28001.1	O-deglycosylation	1	780	1	780	780	96.923	0	1556	100	2051117	179	17570	59.69	93.64	1.85	GUT_GENOME142522	d__Bacteria;p__Actinobacteriota;c__Actinobacteria;o__Actinomycetales;f__Bifidobacteriaceae;g__Bifidobacterium;s__Bifidobacterium adolescentis	SRS1876324	SRP095580	Netherlands	ftp://ftp.ebi.ac.uk/pub/databases/metagenomics/mgnify_genomes/human-gut/v1.0/all_genomes/MGYG-HGUT-023/MGYG-HGUT-02395/genomes5/GUT_GENOME162208.gff.gz	1
GUT_GENOME163068_01333	GUT_GENOME163068_01333	KEF28001.1	O-deglycosylation	1	780	1	780	780	96.923	0	1554	100	2044548	66	70213	59.39	99.15	0.53	GUT_GENOME142522	d__Bacteria;p__Actinobacteriota;c__Actinobacteria;o__Actinomycetales;f__Bifidobacteriaceae;g__Bifidobacterium;s__Bifidobacterium adolescentis	SRS1876690	SRP095580	Netherlands	ftp://ftp.ebi.ac.uk/pub/databases/metagenomics/mgnify_genomes/human-gut/v1.0/all_genomes/MGYG-HGUT-023/MGYG-HGUT-02395/genomes5/GUT_GENOME163068.gff.gz	1
GUT_GENOME163077_00942	GUT_GENOME142520_01307	KEF28001.1	O-deglycosylation	1	780	1	780	780	96.923	0	1557	100	2084912	8	1253769	59.18	100	0	GUT_GENOME142522	d__Bacteria;p__Actinobacteriota;c__Actinobacteria;o__Actinomycetales;f__Bifidobacteriaceae;g__Bifidobacterium;s__Bifidobacterium adolescentis	SAMN04231316	PRJNA300965	NA	ftp://ftp.ebi.ac.uk/pub/databases/metagenomics/mgnify_genomes/human-gut/v1.0/all_genomes/MGYG-HGUT-023/MGYG-HGUT-02395/genomes2/GUT_GENOME142520.gff.gz	2
GUT_GENOME250954_00086	GUT_GENOME250954_00086	CCC80442.1	De-rhamnosylation	4	523	3	521	525	43.238	9.69e-152	453	99	4010579	200	47008	42.64	98.24	0.06	GUT_GENOME000004	d__Bacteria;p__Firmicutes_A;c__Clostridia;o__Lachnospirales;f__Lachnospiraceae;g__Blautia_A;s__Blautia_A sp900066165	ERS746711	ERP010700	United Kingdom	ftp://ftp.ebi.ac.uk/pub/databases/metagenomics/mgnify_genomes/human-gut/v1.0/all_genomes/MGYG-HGUT-000/MGYG-HGUT-00002/genomes1/GUT_GENOME250954.gff.gz	1
GUT_GENOME199071_00994	GUT_GENOME130412_00851	KEF28001.1	O-deglycosylation	1	780	1	780	780	96.923	0	1555	100	1958466	30	103618	59.74	99.55	1.11	GUT_GENOME142522	d__Bacteria;p__Actinobacteriota;c__Actinobacteria;o__Actinomycetales;f__Bifidobacteriaceae;g__Bifidobacterium;s__Bifidobacterium adolescentis	SRS1993576	SRP100446	United States	ftp://ftp.ebi.ac.uk/pub/databases/metagenomics/mgnify_genomes/human-gut/v1.0/all_genomes/MGYG-HGUT-023/MGYG-HGUT-02395/genomes2/GUT_GENOME130412.gff.gz	2
GUT_GENOME206276_00566	GUT_GENOME206276_00566	KEF28001.1	O-deglycosylation	1	780	1	780	780	96.923	0	1554	100	1299339	32	57812	59.05	61.88	0.88	GUT_GENOME142522	d__Bacteria;p__Actinobacteriota;c__Actinobacteria;o__Actinomycetales;f__Bifidobacteriaceae;g__Bifidobacterium;s__Bifidobacterium adolescentis	SRS1996016	SRP100518	Spain	ftp://ftp.ebi.ac.uk/pub/databases/metagenomics/mgnify_genomes/human-gut/v1.0/all_genomes/MGYG-HGUT-023/MGYG-HGUT-02395/genomes4/GUT_GENOME206276.gff.gz	1
GUT_GENOME218614_01429	GUT_GENOME218614_01429	KEF28001.1	O-deglycosylation	1	780	1	780	780	96.923	0	1554	100	1518733	611	2772	60.02	76.97	2.61	GUT_GENOME142522	d__Bacteria;p__Actinobacteriota;c__Actinobacteria;o__Actinomycetales;f__Bifidobacteriaceae;g__Bifidobacterium;s__Bifidobacterium adolescentis	SRS1170821	SRP066479	El Salvador	ftp://ftp.ebi.ac.uk/pub/databases/metagenomics/mgnify_genomes/human-gut/v1.0/all_genomes/MGYG-HGUT-023/MGYG-HGUT-02395/genomes2/GUT_GENOME218614.gff.gz	1
GUT_GENOME251406_00557	GUT_GENOME000004_00732	CCC80440.1	De-rhamnosylation	9	628	6	675	670	42.537	0	576	95	4434075	100	109266	42.6	99.37	0	GUT_GENOME000004	d__Bacteria;p__Firmicutes_A;c__Clostridia;o__Lachnospirales;f__Lachnospiraceae;g__Blautia_A;s__Blautia_A sp900066165	ERS370064	ERP105624	United Kingdom	ftp://ftp.ebi.ac.uk/pub/databases/metagenomics/mgnify_genomes/human-gut/v1.0/all_genomes/MGYG-HGUT-000/MGYG-HGUT-00002/genomes1/GUT_GENOME000004.gff.gz	23
GUT_GENOME218807_00149	GUT_GENOME218807_00149	KEF28001.1	O-deglycosylation	1	780	1	780	780	96.923	0	1555	100	2208202	25	387293	59.6	100	0	GUT_GENOME142522	d__Bacteria;p__Actinobacteriota;c__Actinobacteria;o__Actinomycetales;f__Bifidobacteriaceae;g__Bifidobacterium;s__Bifidobacterium adolescentis	SRS140492	SRP175119	United States	ftp://ftp.ebi.ac.uk/pub/databases/metagenomics/mgnify_genomes/human-gut/v1.0/all_genomes/MGYG-HGUT-023/MGYG-HGUT-02395/genomes2/GUT_GENOME218807.gff.gz	1
GUT_GENOME252095_01293	GUT_GENOME252095_01293	CCC80442.1	De-rhamnosylation	4	523	3	521	525	43.238	9.69e-152	453	99	3442022	166	39429	43.28	97.73	0	GUT_GENOME000004	d__Bacteria;p__Firmicutes_A;c__Clostridia;o__Lachnospirales;f__Lachnospiraceae;g__Blautia_A;s__Blautia_A sp900066165	ERS746724	ERP010700	United Kingdom	ftp://ftp.ebi.ac.uk/pub/databases/metagenomics/mgnify_genomes/human-gut/v1.0/all_genomes/MGYG-HGUT-000/MGYG-HGUT-00002/genomes1/GUT_GENOME252095.gff.gz	1
GUT_GENOME253830_02638	GUT_GENOME253830_02638	CCC80442.1	De-rhamnosylation	4	523	3	521	525	43.238	9.69e-152	453	99	3994685	478	12311	42.85	91.63	3.8	GUT_GENOME000004	d__Bacteria;p__Firmicutes_A;c__Clostridia;o__Lachnospirales;f__Lachnospiraceae;g__Blautia_A;s__Blautia_A sp900066165	ERS746891	ERP010700	United Kingdom	ftp://ftp.ebi.ac.uk/pub/databases/metagenomics/mgnify_genomes/human-gut/v1.0/all_genomes/MGYG-HGUT-000/MGYG-HGUT-00002/genomes1/GUT_GENOME253830.gff.gz	1
GUT_GENOME257469_00039	GUT_GENOME257469_00039	KEF28001.1	O-deglycosylation	1	780	1	780	780	96.923	0	1557	100	2054731	19	291424	59.73	97.5	0	GUT_GENOME142522	d__Bacteria;p__Actinobacteriota;c__Actinobacteria;o__Actinomycetales;f__Bifidobacteriaceae;g__Bifidobacterium;s__Bifidobacterium adolescentis	ERS746796	ERP010700	United Kingdom	ftp://ftp.ebi.ac.uk/pub/databases/metagenomics/mgnify_genomes/human-gut/v1.0/all_genomes/MGYG-HGUT-023/MGYG-HGUT-02395/genomes5/GUT_GENOME257469.gff.gz	1
GUT_GENOME253830_03130	GUT_GENOME253830_03130	ANI69962.1	O-demethylation	2	257	1	255	257	40.078	5.27e-56	203	94	3994685	478	12311	42.85	91.63	3.8	GUT_GENOME000004	d__Bacteria;p__Firmicutes_A;c__Clostridia;o__Lachnospirales;f__Lachnospiraceae;g__Blautia_A;s__Blautia_A sp900066165	ERS746891	ERP010700	United Kingdom	ftp://ftp.ebi.ac.uk/pub/databases/metagenomics/mgnify_genomes/human-gut/v1.0/all_genomes/MGYG-HGUT-000/MGYG-HGUT-00002/genomes1/GUT_GENOME253830.gff.gz	1
GUT_GENOME254850_01516	GUT_GENOME254850_01516	CCC80442.1	De-rhamnosylation	4	523	3	521	525	43.238	9.69e-152	453	99	3452241	161	40199	43.35	98.01	3.8	GUT_GENOME000004	d__Bacteria;p__Firmicutes_A;c__Clostridia;o__Lachnospirales;f__Lachnospiraceae;g__Blautia_A;s__Blautia_A sp900066165	ERS746760	ERP010700	United Kingdom	ftp://ftp.ebi.ac.uk/pub/databases/metagenomics/mgnify_genomes/human-gut/v1.0/all_genomes/MGYG-HGUT-000/MGYG-HGUT-00002/genomes1/GUT_GENOME254850.gff.gz	1
GUT_GENOME254879_00597	GUT_GENOME254879_00597	CCC80442.1	De-rhamnosylation	4	523	3	521	525	43.238	3.2e-151	452	99	2917592	328	12149	43.95	87.73	4.53	GUT_GENOME000004	d__Bacteria;p__Firmicutes_A;c__Clostridia;o__Lachnospirales;f__Lachnospiraceae;g__Blautia_A;s__Blautia_A sp900066165	ERS746761	ERP010700	United Kingdom	ftp://ftp.ebi.ac.uk/pub/databases/metagenomics/mgnify_genomes/human-gut/v1.0/all_genomes/MGYG-HGUT-000/MGYG-HGUT-00002/genomes1/GUT_GENOME254879.gff.gz	1
GUT_GENOME254879_01173	GUT_GENOME254879_01173	BBG22493.1	C-deglyc (PUE)	1	367	1	357	367	54.768	9.57e-137	402	100	2917592	328	12149	43.95	87.73	4.53	GUT_GENOME000004	d__Bacteria;p__Firmicutes_A;c__Clostridia;o__Lachnospirales;f__Lachnospiraceae;g__Blautia_A;s__Blautia_A sp900066165	ERS746761	ERP010700	United Kingdom	ftp://ftp.ebi.ac.uk/pub/databases/metagenomics/mgnify_genomes/human-gut/v1.0/all_genomes/MGYG-HGUT-000/MGYG-HGUT-00002/genomes1/GUT_GENOME254879.gff.gz	1
GUT_GENOME260152_01053	GUT_GENOME260152_01053	KEF28001.1	O-deglycosylation	1	780	1	778	780	96.923	0	1550	100	1580047	18	144468	59.83	72.27	0.68	GUT_GENOME142522	d__Bacteria;p__Actinobacteriota;c__Actinobacteria;o__Actinomycetales;f__Bifidobacteriaceae;g__Bifidobacterium;s__Bifidobacterium adolescentis	ERS746824	ERP010700	United Kingdom	ftp://ftp.ebi.ac.uk/pub/databases/metagenomics/mgnify_genomes/human-gut/v1.0/all_genomes/MGYG-HGUT-023/MGYG-HGUT-02395/genomes1/GUT_GENOME260152.gff.gz	1
GUT_GENOME254966_00652	GUT_GENOME254966_00652	CCC80442.1	De-rhamnosylation	4	523	3	521	525	43.238	9.69e-152	453	99	3436944	99	56269	43.23	89.87	0.85	GUT_GENOME000004	d__Bacteria;p__Firmicutes_A;c__Clostridia;o__Lachnospirales;f__Lachnospiraceae;g__Blautia_A;s__Blautia_A sp900066165	ERS746852	ERP010700	United Kingdom	ftp://ftp.ebi.ac.uk/pub/databases/metagenomics/mgnify_genomes/human-gut/v1.0/all_genomes/MGYG-HGUT-000/MGYG-HGUT-00002/genomes1/GUT_GENOME254966.gff.gz	1
GUT_GENOME266304_00163	GUT_GENOME266304_00163	KEF28001.1	O-deglycosylation	1	780	1	780	780	96.923	0	1556	100	1063071	72	24535	58.69	57.89	0	GUT_GENOME142522	d__Bacteria;p__Actinobacteriota;c__Actinobacteria;o__Actinomycetales;f__Bifidobacteriaceae;g__Bifidobacterium;s__Bifidobacterium adolescentis	ERS971780	ERP012929	Israel	ftp://ftp.ebi.ac.uk/pub/databases/metagenomics/mgnify_genomes/human-gut/v1.0/all_genomes/MGYG-HGUT-023/MGYG-HGUT-02395/genomes5/GUT_GENOME266304.gff.gz	1
GUT_GENOME258942_00724	GUT_GENOME258942_00724	CCC80442.1	De-rhamnosylation	4	523	3	521	525	43.048	2.81e-150	449	99	3280541	417	11009	43.6	85.42	2.34	GUT_GENOME000004	d__Bacteria;p__Firmicutes_A;c__Clostridia;o__Lachnospirales;f__Lachnospiraceae;g__Blautia_A;s__Blautia_A sp900066165	ERS746877	ERP010700	United Kingdom	ftp://ftp.ebi.ac.uk/pub/databases/metagenomics/mgnify_genomes/human-gut/v1.0/all_genomes/MGYG-HGUT-000/MGYG-HGUT-00002/genomes1/GUT_GENOME258942.gff.gz	1
GUT_GENOME258942_01139	GUT_GENOME120005_01408	CCC80440.1	De-rhamnosylation	22	628	1	657	657	42.161	0	549	93	3459354	691	6088	43.08	50.58	0	GUT_GENOME000004	d__Bacteria;p__Firmicutes_A;c__Clostridia;o__Lachnospirales;f__Lachnospiraceae;g__Blautia_A;s__Blautia_A sp900066165	ERS396464	ERP004605	Spain	ftp://ftp.ebi.ac.uk/pub/databases/metagenomics/mgnify_genomes/human-gut/v1.0/all_genomes/MGYG-HGUT-000/MGYG-HGUT-00002/genomes1/GUT_GENOME120005.gff.gz	3
GUT_GENOME267640_00761	GUT_GENOME267640_00761	KEF28001.1	O-deglycosylation	1	780	1	780	780	96.923	0	1554	100	1519703	75	38015	59.58	76.7	0.95	GUT_GENOME142522	d__Bacteria;p__Actinobacteriota;c__Actinobacteria;o__Actinomycetales;f__Bifidobacteriaceae;g__Bifidobacterium;s__Bifidobacterium adolescentis	ERS971833	ERP012929	Israel	ftp://ftp.ebi.ac.uk/pub/databases/metagenomics/mgnify_genomes/human-gut/v1.0/all_genomes/MGYG-HGUT-023/MGYG-HGUT-02395/genomes5/GUT_GENOME267640.gff.gz	1
GUT_GENOME267885_00743	GUT_GENOME267885_00743	KEF28001.1	O-deglycosylation	1	780	1	780	780	96.923	0	1557	100	1394323	33	142632	59.83	66.82	0	GUT_GENOME142522	d__Bacteria;p__Actinobacteriota;c__Actinobacteria;o__Actinomycetales;f__Bifidobacteriaceae;g__Bifidobacterium;s__Bifidobacterium adolescentis	ERS971843	ERP012929	Israel	ftp://ftp.ebi.ac.uk/pub/databases/metagenomics/mgnify_genomes/human-gut/v1.0/all_genomes/MGYG-HGUT-023/MGYG-HGUT-02395/genomes5/GUT_GENOME267885.gff.gz	1
GUT_GENOME271335_00684	GUT_GENOME271335_00684	KEF28001.1	O-deglycosylation	1	780	1	780	780	96.923	0	1554	100	1626193	131	21349	60.07	91.6	1.45	GUT_GENOME142522	d__Bacteria;p__Actinobacteriota;c__Actinobacteria;o__Actinomycetales;f__Bifidobacteriaceae;g__Bifidobacterium;s__Bifidobacterium adolescentis	ERS971990	ERP012929	Israel	ftp://ftp.ebi.ac.uk/pub/databases/metagenomics/mgnify_genomes/human-gut/v1.0/all_genomes/MGYG-HGUT-023/MGYG-HGUT-02395/genomes1/GUT_GENOME271335.gff.gz	1
GUT_GENOME260143_00007	GUT_GENOME094001_02344	ANI69961.1	O-demethylation	1	197	1	209	211	43.602	4.01e-52	176	93	3784612	314	18767	43.03	92.59	3.59	GUT_GENOME000004	d__Bacteria;p__Firmicutes_A;c__Clostridia;o__Lachnospirales;f__Lachnospiraceae;g__Blautia_A;s__Blautia_A sp900066165	ERS608537	ERP008729	Austria	ftp://ftp.ebi.ac.uk/pub/databases/metagenomics/mgnify_genomes/human-gut/v1.0/all_genomes/MGYG-HGUT-000/MGYG-HGUT-00002/genomes1/GUT_GENOME094001.gff.gz	2
GUT_GENOME261310_00465	GUT_GENOME261310_00465	CCC80442.1	De-rhamnosylation	4	523	3	521	525	42.857	1.2e-149	448	99	2870246	479	8008	43.74	80.15	4.85	GUT_GENOME000004	d__Bacteria;p__Firmicutes_A;c__Clostridia;o__Lachnospirales;f__Lachnospiraceae;g__Blautia_A;s__Blautia_A sp900066165	ERS746879	ERP010700	United Kingdom	ftp://ftp.ebi.ac.uk/pub/databases/metagenomics/mgnify_genomes/human-gut/v1.0/all_genomes/MGYG-HGUT-000/MGYG-HGUT-00002/genomes1/GUT_GENOME261310.gff.gz	1
GUT_GENOME272010_00774	GUT_GENOME272010_00774	KEF28001.1	O-deglycosylation	1	780	1	780	780	96.923	0	1555	100	1570079	78	32848	59.59	80.22	2	GUT_GENOME142522	d__Bacteria;p__Actinobacteriota;c__Actinobacteria;o__Actinomycetales;f__Bifidobacteriaceae;g__Bifidobacterium;s__Bifidobacterium adolescentis	ERS972022	ERP012929	Israel	ftp://ftp.ebi.ac.uk/pub/databases/metagenomics/mgnify_genomes/human-gut/v1.0/all_genomes/MGYG-HGUT-023/MGYG-HGUT-02395/genomes5/GUT_GENOME272010.gff.gz	1
GUT_GENOME274652_00864	GUT_GENOME274652_00864	KEF28001.1	O-deglycosylation	1	780	1	780	780	96.923	0	1553	100	1420462	43	54901	59.66	78.86	0	GUT_GENOME142522	d__Bacteria;p__Actinobacteriota;c__Actinobacteria;o__Actinomycetales;f__Bifidobacteriaceae;g__Bifidobacterium;s__Bifidobacterium adolescentis	ERS971687	ERP012929	Israel	ftp://ftp.ebi.ac.uk/pub/databases/metagenomics/mgnify_genomes/human-gut/v1.0/all_genomes/MGYG-HGUT-023/MGYG-HGUT-02395/genomes1/GUT_GENOME274652.gff.gz	1
GUT_GENOME127082_01349	GUT_GENOME127082_01349	KEF28001.1	O-deglycosylation	132	780	1	649	649	96.918	0	1294	83	1822441	182	14999	60.14	96.68	0.74	GUT_GENOME142522	d__Bacteria;p__Actinobacteriota;c__Actinobacteria;o__Actinomycetales;f__Bifidobacteriaceae;g__Bifidobacterium;s__Bifidobacterium adolescentis	SRS1596772	SRP080787	Mongolia	ftp://ftp.ebi.ac.uk/pub/databases/metagenomics/mgnify_genomes/human-gut/v1.0/all_genomes/MGYG-HGUT-023/MGYG-HGUT-02395/genomes3/GUT_GENOME127082.gff.gz	1
GUT_GENOME163860_01220	GUT_GENOME163860_01220	KEF28001.1	O-deglycosylation	1	780	1	780	780	96.795	0	1553	100	1929075	135	26346	59.63	96.5	1.44	GUT_GENOME142522	d__Bacteria;p__Actinobacteriota;c__Actinobacteria;o__Actinomycetales;f__Bifidobacteriaceae;g__Bifidobacterium;s__Bifidobacterium adolescentis	SRS1876449	SRP095580	Netherlands	ftp://ftp.ebi.ac.uk/pub/databases/metagenomics/mgnify_genomes/human-gut/v1.0/all_genomes/MGYG-HGUT-023/MGYG-HGUT-02395/genomes3/GUT_GENOME163860.gff.gz	1
GUT_GENOME261783_01937	GUT_GENOME261783_01937	CCC80442.1	De-rhamnosylation	4	523	3	521	525	43.238	9.08e-152	453	99	2782643	366	10506	43.76	86.67	2.22	GUT_GENOME000004	d__Bacteria;p__Firmicutes_A;c__Clostridia;o__Lachnospirales;f__Lachnospiraceae;g__Blautia_A;s__Blautia_A sp900066165	NA	NA	China	ftp://ftp.ebi.ac.uk/pub/databases/metagenomics/mgnify_genomes/human-gut/v1.0/all_genomes/MGYG-HGUT-000/MGYG-HGUT-00002/genomes1/GUT_GENOME261783.gff.gz	1
GUT_GENOME196994_00163	GUT_GENOME196994_00163	KEF28001.1	O-deglycosylation	1	780	1	780	780	96.795	0	1555	100	1402370	245	6682	60	73.58	2.16	GUT_GENOME142522	d__Bacteria;p__Actinobacteriota;c__Actinobacteria;o__Actinomycetales;f__Bifidobacteriaceae;g__Bifidobacterium;s__Bifidobacterium adolescentis	SRS1876477	SRP095580	Netherlands	ftp://ftp.ebi.ac.uk/pub/databases/metagenomics/mgnify_genomes/human-gut/v1.0/all_genomes/MGYG-HGUT-023/MGYG-HGUT-02395/genomes1/GUT_GENOME196994.gff.gz	1
GUT_GENOME280974_00802	GUT_GENOME280974_00802	KEF28001.1	O-deglycosylation	1	780	1	780	780	96.795	0	1553	100	1109337	46	52360	58.72	51.52	0	GUT_GENOME142522	d__Bacteria;p__Actinobacteriota;c__Actinobacteria;o__Actinomycetales;f__Bifidobacteriaceae;g__Bifidobacterium;s__Bifidobacterium adolescentis	ERS953862	ERP012929	Israel	ftp://ftp.ebi.ac.uk/pub/databases/metagenomics/mgnify_genomes/human-gut/v1.0/all_genomes/MGYG-HGUT-023/MGYG-HGUT-02395/genomes3/GUT_GENOME280974.gff.gz	1
GUT_GENOME265017_00079	GUT_GENOME265017_00079	CCC80442.1	De-rhamnosylation	4	523	3	521	525	43.238	7.97e-152	454	99	3655772	197	39171	43.27	97.77	1.42	GUT_GENOME000004	d__Bacteria;p__Firmicutes_A;c__Clostridia;o__Lachnospirales;f__Lachnospiraceae;g__Blautia_A;s__Blautia_A sp900066165	ERS972483	ERP012929	Israel	ftp://ftp.ebi.ac.uk/pub/databases/metagenomics/mgnify_genomes/human-gut/v1.0/all_genomes/MGYG-HGUT-000/MGYG-HGUT-00002/genomes1/GUT_GENOME265017.gff.gz	1
GUT_GENOME265017_01055	GUT_GENOME265017_01055	QBM20342.1	De-rhamnosylation	1	887	1	887	895	54.525	0	1012	99	3655772	197	39171	43.27	97.77	1.42	GUT_GENOME000004	d__Bacteria;p__Firmicutes_A;c__Clostridia;o__Lachnospirales;f__Lachnospiraceae;g__Blautia_A;s__Blautia_A sp900066165	ERS972483	ERP012929	Israel	ftp://ftp.ebi.ac.uk/pub/databases/metagenomics/mgnify_genomes/human-gut/v1.0/all_genomes/MGYG-HGUT-000/MGYG-HGUT-00002/genomes1/GUT_GENOME265017.gff.gz	1
GUT_GENOME221486_00971	GUT_GENOME128768_00913	KEF28010.1	O-deglycosylation	1	748	1	748	748	96.791	0	1496	100	1223359	32	76539	58.65	56.14	0	GUT_GENOME142522	d__Bacteria;p__Actinobacteriota;c__Actinobacteria;o__Actinomycetales;f__Bifidobacteriaceae;g__Bifidobacterium;s__Bifidobacterium adolescentis	SRS1596836	SRP080787	Mongolia	ftp://ftp.ebi.ac.uk/pub/databases/metagenomics/mgnify_genomes/human-gut/v1.0/all_genomes/MGYG-HGUT-023/MGYG-HGUT-02395/genomes3/GUT_GENOME128768.gff.gz	2
GUT_GENOME265282_00718	GUT_GENOME265282_00718	QBM20342.1	De-rhamnosylation	1	887	1	887	895	54.749	0	1014	99	3701024	204	31222	43.22	96.73	0.65	GUT_GENOME000004	d__Bacteria;p__Firmicutes_A;c__Clostridia;o__Lachnospirales;f__Lachnospiraceae;g__Blautia_A;s__Blautia_A sp900066165	ERS971740	ERP012929	Israel	ftp://ftp.ebi.ac.uk/pub/databases/metagenomics/mgnify_genomes/human-gut/v1.0/all_genomes/MGYG-HGUT-000/MGYG-HGUT-00002/genomes1/GUT_GENOME265282.gff.gz	1
GUT_GENOME203948_00191	GUT_GENOME203948_00191	KEF28001.1	O-deglycosylation	88	710	1	623	623	96.79	0	1240	80	1235806	297	4269	59.94	58.68	1.52	GUT_GENOME142522	d__Bacteria;p__Actinobacteriota;c__Actinobacteria;o__Actinomycetales;f__Bifidobacteriaceae;g__Bifidobacterium;s__Bifidobacterium adolescentis	SRS1996016	SRP100518	Spain	ftp://ftp.ebi.ac.uk/pub/databases/metagenomics/mgnify_genomes/human-gut/v1.0/all_genomes/MGYG-HGUT-023/MGYG-HGUT-02395/genomes3/GUT_GENOME203948.gff.gz	1
GUT_GENOME117907_00094	GUT_GENOME117907_00094	KEF28001.1	O-deglycosylation	1	780	1	780	780	96.667	0	1551	100	1440508	390	4089	59.45	62.75	0.3	GUT_GENOME142522	d__Bacteria;p__Actinobacteriota;c__Actinobacteria;o__Actinomycetales;f__Bifidobacteriaceae;g__Bifidobacterium;s__Bifidobacterium adolescentis	ERS396392	ERP004605	Denmark	ftp://ftp.ebi.ac.uk/pub/databases/metagenomics/mgnify_genomes/human-gut/v1.0/all_genomes/MGYG-HGUT-023/MGYG-HGUT-02395/genomes3/GUT_GENOME117907.gff.gz	1
GUT_GENOME165373_00979	GUT_GENOME165373_00979	KEF28001.1	O-deglycosylation	1	780	1	780	780	96.538	0	1552	100	1276322	66	31663	59.5	64.7	0.09	GUT_GENOME142522	d__Bacteria;p__Actinobacteriota;c__Actinobacteria;o__Actinomycetales;f__Bifidobacteriaceae;g__Bifidobacterium;s__Bifidobacterium adolescentis	SRS576028	SRP040146	United States	ftp://ftp.ebi.ac.uk/pub/databases/metagenomics/mgnify_genomes/human-gut/v1.0/all_genomes/MGYG-HGUT-023/MGYG-HGUT-02395/genomes5/GUT_GENOME165373.gff.gz	1
GUT_GENOME265922_00768	GUT_GENOME000251_01329	CCC80442.1	De-rhamnosylation	16	524	6	509	516	41.667	5.97e-136	413	97	4542778	86	120234	42.69	98.73	0.63	GUT_GENOME000004	d__Bacteria;p__Firmicutes_A;c__Clostridia;o__Lachnospirales;f__Lachnospiraceae;g__Blautia_A;s__Blautia_A sp900066165	ERS852522	ERP012217	United Kingdom	ftp://ftp.ebi.ac.uk/pub/databases/metagenomics/mgnify_genomes/human-gut/v1.0/all_genomes/MGYG-HGUT-000/MGYG-HGUT-00002/genomes1/GUT_GENOME000251.gff.gz	9
GUT_GENOME203924_00970	GUT_GENOME203924_00970	KEF28001.1	O-deglycosylation	1	780	1	780	780	96.538	0	1549	100	1899895	191	14328	59.7	90.57	2.36	GUT_GENOME142522	d__Bacteria;p__Actinobacteriota;c__Actinobacteria;o__Actinomycetales;f__Bifidobacteriaceae;g__Bifidobacterium;s__Bifidobacterium adolescentis	SRS1996016	SRP100518	Spain	ftp://ftp.ebi.ac.uk/pub/databases/metagenomics/mgnify_genomes/human-gut/v1.0/all_genomes/MGYG-HGUT-023/MGYG-HGUT-02395/genomes3/GUT_GENOME203924.gff.gz	1
GUT_GENOME266961_00029	GUT_GENOME266961_00029	CCC80442.1	De-rhamnosylation	4	523	3	521	525	43.048	3.89e-150	449	99	2032131	71	50599	43.84	60.05	0	GUT_GENOME000004	d__Bacteria;p__Firmicutes_A;c__Clostridia;o__Lachnospirales;f__Lachnospiraceae;g__Blautia_A;s__Blautia_A sp900066165	ERS971806	ERP012929	Israel	ftp://ftp.ebi.ac.uk/pub/databases/metagenomics/mgnify_genomes/human-gut/v1.0/all_genomes/MGYG-HGUT-000/MGYG-HGUT-00002/genomes1/GUT_GENOME266961.gff.gz	1
GUT_GENOME266961_00064	GUT_GENOME266961_00064	ANI69962.1	O-demethylation	2	257	1	255	257	40.078	5.06e-56	203	94	2032131	71	50599	43.84	60.05	0	GUT_GENOME000004	d__Bacteria;p__Firmicutes_A;c__Clostridia;o__Lachnospirales;f__Lachnospiraceae;g__Blautia_A;s__Blautia_A sp900066165	ERS971806	ERP012929	Israel	ftp://ftp.ebi.ac.uk/pub/databases/metagenomics/mgnify_genomes/human-gut/v1.0/all_genomes/MGYG-HGUT-000/MGYG-HGUT-00002/genomes1/GUT_GENOME266961.gff.gz	1
GUT_GENOME173504_01669	GUT_GENOME173504_01669	KEF28001.1	O-deglycosylation	5	780	1	776	776	96.521	0	1543	99	1976909	87	37292	59.83	97.57	0.23	GUT_GENOME142522	d__Bacteria;p__Actinobacteriota;c__Actinobacteria;o__Actinomycetales;f__Bifidobacteriaceae;g__Bifidobacterium;s__Bifidobacterium adolescentis	SRS1028196	SRP062282	Germany	ftp://ftp.ebi.ac.uk/pub/databases/metagenomics/mgnify_genomes/human-gut/v1.0/all_genomes/MGYG-HGUT-023/MGYG-HGUT-02395/genomes4/GUT_GENOME173504.gff.gz	1
GUT_GENOME262489_01145	GUT_GENOME262489_01145	KEF28010.1	O-deglycosylation	1	748	1	748	748	96.39	0	1497	100	1640948	125	19622	59.7	81.84	0.45	GUT_GENOME142522	d__Bacteria;p__Actinobacteriota;c__Actinobacteria;o__Actinomycetales;f__Bifidobacteriaceae;g__Bifidobacterium;s__Bifidobacterium adolescentis	NA	NA	China	ftp://ftp.ebi.ac.uk/pub/databases/metagenomics/mgnify_genomes/human-gut/v1.0/all_genomes/MGYG-HGUT-023/MGYG-HGUT-02395/genomes4/GUT_GENOME262489.gff.gz	1
GUT_GENOME218563_00266	GUT_GENOME218563_00266	KEF28001.1	O-deglycosylation	1	780	1	780	780	96.282	0	1544	100	1852008	479	4945	60	89.58	2.97	GUT_GENOME142522	d__Bacteria;p__Actinobacteriota;c__Actinobacteria;o__Actinomycetales;f__Bifidobacteriaceae;g__Bifidobacterium;s__Bifidobacterium adolescentis	SRS1170811	SRP066479	El Salvador	ftp://ftp.ebi.ac.uk/pub/databases/metagenomics/mgnify_genomes/human-gut/v1.0/all_genomes/MGYG-HGUT-023/MGYG-HGUT-02395/genomes4/GUT_GENOME218563.gff.gz	1
GUT_GENOME135240_00719	GUT_GENOME135240_00719	KEF28010.1	O-deglycosylation	1	748	1	748	748	96.257	0	1495	100	1955648	193	14972	59.33	85.38	0.86	GUT_GENOME142522	d__Bacteria;p__Actinobacteriota;c__Actinobacteria;o__Actinomycetales;f__Bifidobacteriaceae;g__Bifidobacterium;s__Bifidobacterium adolescentis	ERS199219	ERP002061	Spain	ftp://ftp.ebi.ac.uk/pub/databases/metagenomics/mgnify_genomes/human-gut/v1.0/all_genomes/MGYG-HGUT-023/MGYG-HGUT-02395/genomes4/GUT_GENOME135240.gff.gz	1
GUT_GENOME268634_01033	GUT_GENOME268634_01033	ANI69962.1	O-demethylation	2	257	1	255	257	40.078	5.06e-56	203	94	3631828	395	14393	42.92	94.92	1.56	GUT_GENOME000004	d__Bacteria;p__Firmicutes_A;c__Clostridia;o__Lachnospirales;f__Lachnospiraceae;g__Blautia_A;s__Blautia_A sp900066165	ERS971870	ERP012929	Israel	ftp://ftp.ebi.ac.uk/pub/databases/metagenomics/mgnify_genomes/human-gut/v1.0/all_genomes/MGYG-HGUT-000/MGYG-HGUT-00002/genomes1/GUT_GENOME268634.gff.gz	1
GUT_GENOME268634_01262	GUT_GENOME268634_01262	CCC80442.1	De-rhamnosylation	4	523	3	521	525	43.238	9.69e-152	453	99	3631828	395	14393	42.92	94.92	1.56	GUT_GENOME000004	d__Bacteria;p__Firmicutes_A;c__Clostridia;o__Lachnospirales;f__Lachnospiraceae;g__Blautia_A;s__Blautia_A sp900066165	ERS971870	ERP012929	Israel	ftp://ftp.ebi.ac.uk/pub/databases/metagenomics/mgnify_genomes/human-gut/v1.0/all_genomes/MGYG-HGUT-000/MGYG-HGUT-00002/genomes1/GUT_GENOME268634.gff.gz	1
GUT_GENOME196121_00689	GUT_GENOME196121_00689	KEF28010.1	O-deglycosylation	1	748	1	748	748	95.989	0	1493	100	1641551	368	4886	59.02	75.79	4.12	GUT_GENOME142522	d__Bacteria;p__Actinobacteriota;c__Actinobacteria;o__Actinomycetales;f__Bifidobacteriaceae;g__Bifidobacterium;s__Bifidobacterium adolescentis	SRS1876307	SRP095580	Netherlands	ftp://ftp.ebi.ac.uk/pub/databases/metagenomics/mgnify_genomes/human-gut/v1.0/all_genomes/MGYG-HGUT-023/MGYG-HGUT-02395/genomes5/GUT_GENOME196121.gff.gz	1
GUT_GENOME268920_01843	GUT_GENOME268920_01843	CCC80442.1	De-rhamnosylation	4	523	3	521	525	43.048	2.81e-150	449	99	3288839	151	36689	43.35	95.68	2.71	GUT_GENOME000004	d__Bacteria;p__Firmicutes_A;c__Clostridia;o__Lachnospirales;f__Lachnospiraceae;g__Blautia_A;s__Blautia_A sp900066165	ERS971881	ERP012929	Israel	ftp://ftp.ebi.ac.uk/pub/databases/metagenomics/mgnify_genomes/human-gut/v1.0/all_genomes/MGYG-HGUT-000/MGYG-HGUT-00002/genomes1/GUT_GENOME268920.gff.gz	1
GUT_GENOME160238_01048	GUT_GENOME160238_01048	KEF27912.1	O-deglycosylation	1	809	1	809	809	95.674	0	1561	100	1716480	138	20888	59.89	82.01	1.59	GUT_GENOME142522	d__Bacteria;p__Actinobacteriota;c__Actinobacteria;o__Actinomycetales;f__Bifidobacteriaceae;g__Bifidobacterium;s__Bifidobacterium adolescentis	SRS1876261	SRP095580	Netherlands	ftp://ftp.ebi.ac.uk/pub/databases/metagenomics/mgnify_genomes/human-gut/v1.0/all_genomes/MGYG-HGUT-023/MGYG-HGUT-02395/genomes1/GUT_GENOME160238.gff.gz	1
GUT_GENOME220489_00655	GUT_GENOME220489_00655	KEF27912.1	O-deglycosylation	1	809	1	809	809	95.55	0	1578	100	1282338	33	92133	59.5	69.49	0.54	GUT_GENOME142522	d__Bacteria;p__Actinobacteriota;c__Actinobacteria;o__Actinomycetales;f__Bifidobacteriaceae;g__Bifidobacterium;s__Bifidobacterium adolescentis	SRS1596796	SRP080787	Mongolia	ftp://ftp.ebi.ac.uk/pub/databases/metagenomics/mgnify_genomes/human-gut/v1.0/all_genomes/MGYG-HGUT-023/MGYG-HGUT-02395/genomes3/GUT_GENOME220489.gff.gz	1
GUT_GENOME269455_01591	GUT_GENOME046677_02205	CCC80442.1	De-rhamnosylation	69	523	35	490	457	43.982	4.55e-140	422	87	3857983	200	35618	42.88	96.76	0.29	GUT_GENOME000004	d__Bacteria;p__Firmicutes_A;c__Clostridia;o__Lachnospirales;f__Lachnospiraceae;g__Blautia_A;s__Blautia_A sp900066165	ERS1343397	ERP017091	China	ftp://ftp.ebi.ac.uk/pub/databases/metagenomics/mgnify_genomes/human-gut/v1.0/all_genomes/MGYG-HGUT-000/MGYG-HGUT-00002/genomes1/GUT_GENOME046677.gff.gz	1
GUT_GENOME269521_00011	GUT_GENOME269521_00011	ANI69962.1	O-demethylation	2	257	1	255	257	40.078	4.96e-56	203	94	3626316	168	42109	43.21	95.89	1.57	GUT_GENOME000004	d__Bacteria;p__Firmicutes_A;c__Clostridia;o__Lachnospirales;f__Lachnospiraceae;g__Blautia_A;s__Blautia_A sp900066165	ERS971907	ERP012929	Israel	ftp://ftp.ebi.ac.uk/pub/databases/metagenomics/mgnify_genomes/human-gut/v1.0/all_genomes/MGYG-HGUT-000/MGYG-HGUT-00002/genomes1/GUT_GENOME269521.gff.gz	1
GUT_GENOME269521_00048	GUT_GENOME269521_00048	CCC80442.1	De-rhamnosylation	4	523	3	521	525	43.238	2.78e-151	452	99	3626316	168	42109	43.21	95.89	1.57	GUT_GENOME000004	d__Bacteria;p__Firmicutes_A;c__Clostridia;o__Lachnospirales;f__Lachnospiraceae;g__Blautia_A;s__Blautia_A sp900066165	ERS971907	ERP012929	Israel	ftp://ftp.ebi.ac.uk/pub/databases/metagenomics/mgnify_genomes/human-gut/v1.0/all_genomes/MGYG-HGUT-000/MGYG-HGUT-00002/genomes1/GUT_GENOME269521.gff.gz	1
GUT_GENOME277750_00820	GUT_GENOME277750_00820	KEF27912.1	O-deglycosylation	1	809	1	809	809	95.55	0	1558	100	1351878	41	53467	59.49	66.84	1.99	GUT_GENOME142522	d__Bacteria;p__Actinobacteriota;c__Actinobacteria;o__Actinomycetales;f__Bifidobacteriaceae;g__Bifidobacterium;s__Bifidobacterium adolescentis	ERS971704	ERP012929	Israel	ftp://ftp.ebi.ac.uk/pub/databases/metagenomics/mgnify_genomes/human-gut/v1.0/all_genomes/MGYG-HGUT-023/MGYG-HGUT-02395/genomes1/GUT_GENOME277750.gff.gz	1
GUT_GENOME024311_00456	GUT_GENOME024311_00456	KEF27912.1	O-deglycosylation	1	809	1	809	809	95.426	0	1555	100	1691575	182	14440	59.81	82.89	3.05	GUT_GENOME142522	d__Bacteria;p__Actinobacteriota;c__Actinobacteria;o__Actinomycetales;f__Bifidobacteriaceae;g__Bifidobacterium;s__Bifidobacterium adolescentis	ERS1444542	ERP019502	Kazakhstan	ftp://ftp.ebi.ac.uk/pub/databases/metagenomics/mgnify_genomes/human-gut/v1.0/all_genomes/MGYG-HGUT-023/MGYG-HGUT-02395/genomes3/GUT_GENOME024311.gff.gz	1
GUT_GENOME027019_01339	GUT_GENOME027019_01339	KEF27912.1	O-deglycosylation	1	809	1	809	809	95.426	0	1557	100	1834080	61	47691	59.66	92.89	0.23	GUT_GENOME142522	d__Bacteria;p__Actinobacteriota;c__Actinobacteria;o__Actinomycetales;f__Bifidobacteriaceae;g__Bifidobacterium;s__Bifidobacterium adolescentis	ERS1444630	ERP019502	Kazakhstan	ftp://ftp.ebi.ac.uk/pub/databases/metagenomics/mgnify_genomes/human-gut/v1.0/all_genomes/MGYG-HGUT-023/MGYG-HGUT-02395/genomes4/GUT_GENOME027019.gff.gz	1
GUT_GENOME184409_01346	GUT_GENOME184409_01346	KEF28010.1	O-deglycosylation	143	748	1	606	606	95.38	0	1165	81	1746027	187	13266	59.95	92.73	1.98	GUT_GENOME142522	d__Bacteria;p__Actinobacteriota;c__Actinobacteria;o__Actinomycetales;f__Bifidobacteriaceae;g__Bifidobacterium;s__Bifidobacterium adolescentis	SRS1735686	SRP090628	Finland	ftp://ftp.ebi.ac.uk/pub/databases/metagenomics/mgnify_genomes/human-gut/v1.0/all_genomes/MGYG-HGUT-023/MGYG-HGUT-02395/genomes3/GUT_GENOME184409.gff.gz	3
GUT_GENOME270539_01644	GUT_GENOME087868_00570	QBM20342.1	De-rhamnosylation	1	887	1	887	895	54.972	0	1018	99	3890132	331	27610	43.09	90.79	0.84	GUT_GENOME000004	d__Bacteria;p__Firmicutes_A;c__Clostridia;o__Lachnospirales;f__Lachnospiraceae;g__Blautia_A;s__Blautia_A sp900066165	ERS608511	ERP008729	Austria	ftp://ftp.ebi.ac.uk/pub/databases/metagenomics/mgnify_genomes/human-gut/v1.0/all_genomes/MGYG-HGUT-000/MGYG-HGUT-00002/genomes1/GUT_GENOME087868.gff.gz	6
GUT_GENOME270539_01943	GUT_GENOME004166_00756	CCC80442.1	De-rhamnosylation	4	523	3	521	525	43.048	7.71e-150	449	99	1920814	568	3673	44.26	57.95	0.63	GUT_GENOME000004	d__Bacteria;p__Firmicutes_A;c__Clostridia;o__Lachnospirales;f__Lachnospiraceae;g__Blautia_A;s__Blautia_A sp900066165	ERS473186	ERP005989	Sweden	ftp://ftp.ebi.ac.uk/pub/databases/metagenomics/mgnify_genomes/human-gut/v1.0/all_genomes/MGYG-HGUT-000/MGYG-HGUT-00002/genomes1/GUT_GENOME004166.gff.gz	8
GUT_GENOME162870_00529	GUT_GENOME162870_00529	KEF28010.1	O-deglycosylation	1	748	1	748	748	95.053	0	1476	100	2029834	23	120236	59.61	99.55	0	GUT_GENOME142522	d__Bacteria;p__Actinobacteriota;c__Actinobacteria;o__Actinomycetales;f__Bifidobacteriaceae;g__Bifidobacterium;s__Bifidobacterium adolescentis	SRS1876426	SRP095580	Netherlands	ftp://ftp.ebi.ac.uk/pub/databases/metagenomics/mgnify_genomes/human-gut/v1.0/all_genomes/MGYG-HGUT-023/MGYG-HGUT-02395/genomes3/GUT_GENOME162870.gff.gz	1
GUT_GENOME042313_01075	GUT_GENOME042313_01075	KEF28001.1	O-deglycosylation	5	780	1	776	776	94.974	0	1523	99	1984113	80	42009	59.86	98.41	0.72	GUT_GENOME142522	d__Bacteria;p__Actinobacteriota;c__Actinobacteria;o__Actinomycetales;f__Bifidobacteriaceae;g__Bifidobacterium;s__Bifidobacterium adolescentis	ERS1069680	ERP013827	Netherlands	ftp://ftp.ebi.ac.uk/pub/databases/metagenomics/mgnify_genomes/human-gut/v1.0/all_genomes/MGYG-HGUT-023/MGYG-HGUT-02395/genomes3/GUT_GENOME042313.gff.gz	1
GUT_GENOME225015_00133	GUT_GENOME184080_01186	KEF28010.1	O-deglycosylation	1	748	1	748	748	94.385	0	1467	100	1829328	135	18494	59.64	93.7	0.97	GUT_GENOME142522	d__Bacteria;p__Actinobacteriota;c__Actinobacteria;o__Actinomycetales;f__Bifidobacteriaceae;g__Bifidobacterium;s__Bifidobacterium adolescentis	SRS1735555	SRP090628	Estonia	ftp://ftp.ebi.ac.uk/pub/databases/metagenomics/mgnify_genomes/human-gut/v1.0/all_genomes/MGYG-HGUT-023/MGYG-HGUT-02395/genomes5/GUT_GENOME184080.gff.gz	6
GUT_GENOME271375_00291	GUT_GENOME091817_02157	CCC80440.1	De-rhamnosylation	9	627	6	633	628	45.064	0	590	95	2732547	424	8439	43.64	75.49	0.77	GUT_GENOME000004	d__Bacteria;p__Firmicutes_A;c__Clostridia;o__Lachnospirales;f__Lachnospiraceae;g__Blautia_A;s__Blautia_A sp900066165	ERS608477	ERP008729	Austria	ftp://ftp.ebi.ac.uk/pub/databases/metagenomics/mgnify_genomes/human-gut/v1.0/all_genomes/MGYG-HGUT-000/MGYG-HGUT-00002/genomes1/GUT_GENOME091817.gff.gz	2
GUT_GENOME142513_01327	GUT_GENOME142513_01327	KEF28010.1	O-deglycosylation	1	748	1	748	748	94.118	0	1427	100	2095557	8	1211201	59.38	100	0	GUT_GENOME142522	d__Bacteria;p__Actinobacteriota;c__Actinobacteria;o__Actinomycetales;f__Bifidobacteriaceae;g__Bifidobacterium;s__Bifidobacterium adolescentis	SAMN04231313	PRJNA300965	Italy	ftp://ftp.ebi.ac.uk/pub/databases/metagenomics/mgnify_genomes/human-gut/v1.0/all_genomes/MGYG-HGUT-023/MGYG-HGUT-02395/genomes2/GUT_GENOME142513.gff.gz	2
GUT_GENOME271375_01308	GUT_GENOME189941_00923	QBM20342.1	De-rhamnosylation	1	887	1	887	895	54.302	0	1008	99	2761206	208	19609	43.78	86.96	2.11	GUT_GENOME000004	d__Bacteria;p__Firmicutes_A;c__Clostridia;o__Lachnospirales;f__Lachnospiraceae;g__Blautia_A;s__Blautia_A sp900066165	SRS1820291	SRP093965	United States	ftp://ftp.ebi.ac.uk/pub/databases/metagenomics/mgnify_genomes/human-gut/v1.0/all_genomes/MGYG-HGUT-000/MGYG-HGUT-00002/genomes1/GUT_GENOME189941.gff.gz	4
GUT_GENOME224355_00866	GUT_GENOME224355_00866	KEF28010.1	O-deglycosylation	1	748	1	748	748	93.717	0	1425	100	2075480	37	148986	58.88	100	0.45	GUT_GENOME142522	d__Bacteria;p__Actinobacteriota;c__Actinobacteria;o__Actinomycetales;f__Bifidobacteriaceae;g__Bifidobacterium;s__Bifidobacterium adolescentis	SRS1719567	SRP090628	Russia	ftp://ftp.ebi.ac.uk/pub/databases/metagenomics/mgnify_genomes/human-gut/v1.0/all_genomes/MGYG-HGUT-023/MGYG-HGUT-02395/genomes1/GUT_GENOME224355.gff.gz	1
GUT_GENOME048888_01175	GUT_GENOME048888_01175	KEF28010.1	O-deglycosylation	1	748	1	748	748	93.583	0	1424	100	1997210	36	87289	59.96	98.86	0.45	GUT_GENOME142522	d__Bacteria;p__Actinobacteriota;c__Actinobacteria;o__Actinomycetales;f__Bifidobacteriaceae;g__Bifidobacterium;s__Bifidobacterium adolescentis	ERS1647294	ERP019674	Germany	ftp://ftp.ebi.ac.uk/pub/databases/metagenomics/mgnify_genomes/human-gut/v1.0/all_genomes/MGYG-HGUT-023/MGYG-HGUT-02395/genomes1/GUT_GENOME048888.gff.gz	4
GUT_GENOME154778_00704	GUT_GENOME154778_00704	KEF27912.1	O-deglycosylation	1	809	1	811	811	93.465	0	1540	100	1208569	32	60474	59.95	59.32	0	GUT_GENOME142522	d__Bacteria;p__Actinobacteriota;c__Actinobacteria;o__Actinomycetales;f__Bifidobacteriaceae;g__Bifidobacterium;s__Bifidobacterium adolescentis	ERS475199	ERP005860	China	ftp://ftp.ebi.ac.uk/pub/databases/metagenomics/mgnify_genomes/human-gut/v1.0/all_genomes/MGYG-HGUT-023/MGYG-HGUT-02395/genomes4/GUT_GENOME154778.gff.gz	1
GUT_GENOME047982_00807	GUT_GENOME047982_00807	KEF28010.1	O-deglycosylation	1	748	1	748	748	91.578	0	1395	100	1068543	141	10393	61.42	61.43	0.15	GUT_GENOME142522	d__Bacteria;p__Actinobacteriota;c__Actinobacteria;o__Actinomycetales;f__Bifidobacteriaceae;g__Bifidobacterium;s__Bifidobacterium adolescentis	ERS1647277	ERP019674	Germany	ftp://ftp.ebi.ac.uk/pub/databases/metagenomics/mgnify_genomes/human-gut/v1.0/all_genomes/MGYG-HGUT-023/MGYG-HGUT-02395/genomes2/GUT_GENOME047982.gff.gz	1
GUT_GENOME278505_01933	GUT_GENOME278505_01933	QBM20342.1	De-rhamnosylation	1	887	1	887	895	54.413	0	1010	99	4125206	203	42884	42.55	98.95	0.02	GUT_GENOME000004	d__Bacteria;p__Firmicutes_A;c__Clostridia;o__Lachnospirales;f__Lachnospiraceae;g__Blautia_A;s__Blautia_A sp900066165	ERS972348	ERP012929	Israel	ftp://ftp.ebi.ac.uk/pub/databases/metagenomics/mgnify_genomes/human-gut/v1.0/all_genomes/MGYG-HGUT-000/MGYG-HGUT-00002/genomes1/GUT_GENOME278505.gff.gz	1
GUT_GENOME280120_00029	GUT_GENOME044536_01206	CCC80442.1	De-rhamnosylation	4	523	3	521	525	43.238	7.15e-151	451	99	3239435	145	35387	43.24	91.9	1.48	GUT_GENOME000004	d__Bacteria;p__Firmicutes_A;c__Clostridia;o__Lachnospirales;f__Lachnospiraceae;g__Blautia_A;s__Blautia_A sp900066165	ERS1289680	ERP016813	China	ftp://ftp.ebi.ac.uk/pub/databases/metagenomics/mgnify_genomes/human-gut/v1.0/all_genomes/MGYG-HGUT-000/MGYG-HGUT-00002/genomes1/GUT_GENOME044536.gff.gz	2
GUT_GENOME047978_00686	GUT_GENOME047978_00686	KEF28010.1	O-deglycosylation	1	748	1	748	748	91.444	0	1394	100	1248906	227	6709	61.45	65.93	1.14	GUT_GENOME142522	d__Bacteria;p__Actinobacteriota;c__Actinobacteria;o__Actinomycetales;f__Bifidobacteriaceae;g__Bifidobacterium;s__Bifidobacterium adolescentis	ERS1647277	ERP019674	Germany	ftp://ftp.ebi.ac.uk/pub/databases/metagenomics/mgnify_genomes/human-gut/v1.0/all_genomes/MGYG-HGUT-023/MGYG-HGUT-02395/genomes4/GUT_GENOME047978.gff.gz	1
GUT_GENOME060963_00608	GUT_GENOME005013_00742	KEF27912.1	O-deglycosylation	1	809	1	811	811	90.999	0	1488	100	1404734	48	54013	59.83	64.09	0.45	GUT_GENOME142522	d__Bacteria;p__Actinobacteriota;c__Actinobacteria;o__Actinomycetales;f__Bifidobacteriaceae;g__Bifidobacterium;s__Bifidobacterium adolescentis	ERS473247	ERP005989	Sweden	ftp://ftp.ebi.ac.uk/pub/databases/metagenomics/mgnify_genomes/human-gut/v1.0/all_genomes/MGYG-HGUT-023/MGYG-HGUT-02395/genomes4/GUT_GENOME005013.gff.gz	11
GUT_GENOME281024_01889	GUT_GENOME281024_01889	CCC80442.1	De-rhamnosylation	4	523	3	521	525	43.048	1.94e-150	450	99	3451102	420	12133	43.53	89.77	3.16	GUT_GENOME000004	d__Bacteria;p__Firmicutes_A;c__Clostridia;o__Lachnospirales;f__Lachnospiraceae;g__Blautia_A;s__Blautia_A sp900066165	ERS953863	ERP012929	Israel	ftp://ftp.ebi.ac.uk/pub/databases/metagenomics/mgnify_genomes/human-gut/v1.0/all_genomes/MGYG-HGUT-000/MGYG-HGUT-00002/genomes1/GUT_GENOME281024.gff.gz	1
GUT_GENOME281640_01064	GUT_GENOME281640_01064	CCC80442.1	De-rhamnosylation	4	523	3	521	525	42.857	5.75e-150	449	99	3956987	428	13544	42.89	97.47	0.86	GUT_GENOME000004	d__Bacteria;p__Firmicutes_A;c__Clostridia;o__Lachnospirales;f__Lachnospiraceae;g__Blautia_A;s__Blautia_A sp900066165	ERS953896	ERP012929	Israel	ftp://ftp.ebi.ac.uk/pub/databases/metagenomics/mgnify_genomes/human-gut/v1.0/all_genomes/MGYG-HGUT-000/MGYG-HGUT-00002/genomes1/GUT_GENOME281640.gff.gz	1
GUT_GENOME042806_00084	GUT_GENOME042806_00084	KEF27912.1	O-deglycosylation	1	809	1	811	811	90.875	0	1486	100	1100375	277	4189	59.99	58.48	1.25	GUT_GENOME142522	d__Bacteria;p__Actinobacteriota;c__Actinobacteria;o__Actinomycetales;f__Bifidobacteriaceae;g__Bifidobacterium;s__Bifidobacterium adolescentis	ERS1069681	ERP013827	Netherlands	ftp://ftp.ebi.ac.uk/pub/databases/metagenomics/mgnify_genomes/human-gut/v1.0/all_genomes/MGYG-HGUT-023/MGYG-HGUT-02395/genomes4/GUT_GENOME042806.gff.gz	1
GUT_GENOME281640_02432	GUT_GENOME281640_02432	AAV43293.1	De-rhamnosylation	89	876	7	808	815	40.736	0	594	85	3956987	428	13544	42.89	97.47	0.86	GUT_GENOME000004	d__Bacteria;p__Firmicutes_A;c__Clostridia;o__Lachnospirales;f__Lachnospiraceae;g__Blautia_A;s__Blautia_A sp900066165	ERS953896	ERP012929	Israel	ftp://ftp.ebi.ac.uk/pub/databases/metagenomics/mgnify_genomes/human-gut/v1.0/all_genomes/MGYG-HGUT-000/MGYG-HGUT-00002/genomes1/GUT_GENOME281640.gff.gz	1
GUT_GENOME097163_01137	GUT_GENOME097163_01137	KEF27912.1	O-deglycosylation	1	809	1	811	811	90.875	0	1484	100	1771843	97	30392	60.13	59.25	0	GUT_GENOME142522	d__Bacteria;p__Actinobacteriota;c__Actinobacteria;o__Actinomycetales;f__Bifidobacteriaceae;g__Bifidobacterium;s__Bifidobacterium adolescentis	SRS585059	SRP040765	United States	ftp://ftp.ebi.ac.uk/pub/databases/metagenomics/mgnify_genomes/human-gut/v1.0/all_genomes/MGYG-HGUT-023/MGYG-HGUT-02395/genomes5/GUT_GENOME097163.gff.gz	1
GUT_GENOME002266_00817	GUT_GENOME002266_00817	KEF27912.1	O-deglycosylation	1	809	1	811	811	90.752	0	1480	100	1825002	178	15080	59.82	93.09	0.91	GUT_GENOME142522	d__Bacteria;p__Actinobacteriota;c__Actinobacteria;o__Actinomycetales;f__Bifidobacteriaceae;g__Bifidobacterium;s__Bifidobacterium adolescentis	ERS473041	ERP005989	Sweden	ftp://ftp.ebi.ac.uk/pub/databases/metagenomics/mgnify_genomes/human-gut/v1.0/all_genomes/MGYG-HGUT-023/MGYG-HGUT-02395/genomes3/GUT_GENOME002266.gff.gz	3
GUT_GENOME002581_03391	GUT_GENOME002581_03391	AAO76887.1	O-deglycosylation	1	950	5	954	950	99.789	0	1977	100	5861275	193	57041	42.72	78.45	0	GUT_GENOME001120	d__Bacteria;p__Bacteroidota;c__Bacteroidia;o__Bacteroidales;f__Bacteroidaceae;g__Bacteroides;s__Bacteroides thetaiotaomicron	ERS473064	ERP005989	Sweden	ftp://ftp.ebi.ac.uk/pub/databases/metagenomics/mgnify_genomes/human-gut/v1.0/all_genomes/MGYG-HGUT-001/MGYG-HGUT-00196/genomes1/GUT_GENOME002581.gff.gz	1
GUT_GENOME282192_02316	GUT_GENOME282192_02316	CCC80442.1	De-rhamnosylation	4	523	3	521	525	43.238	1.78e-151	452	99	3237512	421	11278	43.49	90.6	1.02	GUT_GENOME000004	d__Bacteria;p__Firmicutes_A;c__Clostridia;o__Lachnospirales;f__Lachnospiraceae;g__Blautia_A;s__Blautia_A sp900066165	ERS436793	ERP005534	France	ftp://ftp.ebi.ac.uk/pub/databases/metagenomics/mgnify_genomes/human-gut/v1.0/all_genomes/MGYG-HGUT-000/MGYG-HGUT-00002/genomes1/GUT_GENOME282192.gff.gz	1
GUT_GENOME282192_02465	GUT_GENOME282192_02465	QBM20342.1	De-rhamnosylation	1	887	1	887	895	54.749	0	1013	99	3237512	421	11278	43.49	90.6	1.02	GUT_GENOME000004	d__Bacteria;p__Firmicutes_A;c__Clostridia;o__Lachnospirales;f__Lachnospiraceae;g__Blautia_A;s__Blautia_A sp900066165	ERS436793	ERP005534	France	ftp://ftp.ebi.ac.uk/pub/databases/metagenomics/mgnify_genomes/human-gut/v1.0/all_genomes/MGYG-HGUT-000/MGYG-HGUT-00002/genomes1/GUT_GENOME282192.gff.gz	1
GUT_GENOME282380_00090	GUT_GENOME063147_00494	ANI69962.1	O-demethylation	2	257	1	255	257	40.078	5.06e-56	203	94	4470839	202	38128	42.65	91.76	5	GUT_GENOME000004	d__Bacteria;p__Firmicutes_A;c__Clostridia;o__Lachnospirales;f__Lachnospiraceae;g__Blautia_A;s__Blautia_A sp900066165	ERS537183	ERP006678	China	ftp://ftp.ebi.ac.uk/pub/databases/metagenomics/mgnify_genomes/human-gut/v1.0/all_genomes/MGYG-HGUT-000/MGYG-HGUT-00002/genomes1/GUT_GENOME063147.gff.gz	6
GUT_GENOME282380_01417	GUT_GENOME282380_01417	QBM20340.1	De-rhamnosylation	2	816	1	851	860	41.977	0	653	98	2770633	447	7793	43.77	80.35	1.16	GUT_GENOME000004	d__Bacteria;p__Firmicutes_A;c__Clostridia;o__Lachnospirales;f__Lachnospiraceae;g__Blautia_A;s__Blautia_A sp900066165	ERS436782	ERP005534	France	ftp://ftp.ebi.ac.uk/pub/databases/metagenomics/mgnify_genomes/human-gut/v1.0/all_genomes/MGYG-HGUT-000/MGYG-HGUT-00002/genomes1/GUT_GENOME282380.gff.gz	1
GUT_GENOME282704_00842	GUT_GENOME081616_01060	ANI69961.1	O-demethylation	1	197	1	198	199	46.231	4.42e-57	189	93	2071451	306	10717	43.93	66.09	0.69	GUT_GENOME000004	d__Bacteria;p__Firmicutes_A;c__Clostridia;o__Lachnospirales;f__Lachnospiraceae;g__Blautia_A;s__Blautia_A sp900066165	ERS537220	ERP006678	China	ftp://ftp.ebi.ac.uk/pub/databases/metagenomics/mgnify_genomes/human-gut/v1.0/all_genomes/MGYG-HGUT-000/MGYG-HGUT-00002/genomes1/GUT_GENOME081616.gff.gz	2
GUT_GENOME076013_01167	GUT_GENOME076013_01167	AAO76887.1	O-deglycosylation	1	950	5	954	950	99.789	0	1977	100	5832137	285	43148	42.98	90.73	2.95	GUT_GENOME001120	d__Bacteria;p__Bacteroidota;c__Bacteroidia;o__Bacteroidales;f__Bacteroidaceae;g__Bacteroides;s__Bacteroides thetaiotaomicron	ERS473064	ERP005989	Sweden	ftp://ftp.ebi.ac.uk/pub/databases/metagenomics/mgnify_genomes/human-gut/v1.0/all_genomes/MGYG-HGUT-001/MGYG-HGUT-00196/genomes1/GUT_GENOME076013.gff.gz	1
GUT_GENOME098181_01008	GUT_GENOME045828_03789	AAO76887.1	O-deglycosylation	1	950	5	954	950	99.789	0	1974	100	5625092	227	43096	42.71	74.31	0	GUT_GENOME001120	d__Bacteria;p__Bacteroidota;c__Bacteroidia;o__Bacteroidales;f__Bacteroidaceae;g__Bacteroides;s__Bacteroides thetaiotaomicron	ERS1343344	ERP017091	China	ftp://ftp.ebi.ac.uk/pub/databases/metagenomics/mgnify_genomes/human-gut/v1.0/all_genomes/MGYG-HGUT-001/MGYG-HGUT-00196/genomes1/GUT_GENOME045828.gff.gz	2
GUT_GENOME283525_00629	GUT_GENOME283525_00629	QBM20342.1	De-rhamnosylation	1	887	1	887	895	54.525	0	1012	99	2678776	428	8755	43.76	81.93	0.08	GUT_GENOME000004	d__Bacteria;p__Firmicutes_A;c__Clostridia;o__Lachnospirales;f__Lachnospiraceae;g__Blautia_A;s__Blautia_A sp900066165	ERS436794	ERP005534	France	ftp://ftp.ebi.ac.uk/pub/databases/metagenomics/mgnify_genomes/human-gut/v1.0/all_genomes/MGYG-HGUT-000/MGYG-HGUT-00002/genomes1/GUT_GENOME283525.gff.gz	1
GUT_GENOME283525_00725	GUT_GENOME283525_00725	CCC80442.1	De-rhamnosylation	4	523	3	521	525	42.857	3.23e-149	447	99	2678776	428	8755	43.76	81.93	0.08	GUT_GENOME000004	d__Bacteria;p__Firmicutes_A;c__Clostridia;o__Lachnospirales;f__Lachnospiraceae;g__Blautia_A;s__Blautia_A sp900066165	ERS436794	ERP005534	France	ftp://ftp.ebi.ac.uk/pub/databases/metagenomics/mgnify_genomes/human-gut/v1.0/all_genomes/MGYG-HGUT-000/MGYG-HGUT-00002/genomes1/GUT_GENOME283525.gff.gz	1
GUT_GENOME101737_00667	GUT_GENOME101737_00667	AAO76887.1	O-deglycosylation	1	950	5	954	950	99.789	0	1977	100	5329353	127	66800	42.83	66.38	0	GUT_GENOME001120	d__Bacteria;p__Bacteroidota;c__Bacteroidia;o__Bacteroidales;f__Bacteroidaceae;g__Bacteroides;s__Bacteroides thetaiotaomicron	SRS019397	SRP002163	United States	ftp://ftp.ebi.ac.uk/pub/databases/metagenomics/mgnify_genomes/human-gut/v1.0/all_genomes/MGYG-HGUT-001/MGYG-HGUT-00196/genomes2/GUT_GENOME101737.gff.gz	1
GUT_GENOME150232_04344	GUT_GENOME048827_01088	AAO76887.1	O-deglycosylation	1	950	5	954	950	99.789	0	1977	100	5527856	143	61792	43.2	71.72	1.72	GUT_GENOME001120	d__Bacteria;p__Bacteroidota;c__Bacteroidia;o__Bacteroidales;f__Bacteroidaceae;g__Bacteroides;s__Bacteroides thetaiotaomicron	ERS1647310	ERP019674	Germany	ftp://ftp.ebi.ac.uk/pub/databases/metagenomics/mgnify_genomes/human-gut/v1.0/all_genomes/MGYG-HGUT-001/MGYG-HGUT-00196/genomes1/GUT_GENOME048827.gff.gz	11
GUT_GENOME283598_00615	GUT_GENOME283598_00615	CCC80442.1	De-rhamnosylation	4	523	3	521	525	43.048	2.81e-150	449	99	3216561	314	14586	43.62	92.84	2.59	GUT_GENOME000004	d__Bacteria;p__Firmicutes_A;c__Clostridia;o__Lachnospirales;f__Lachnospiraceae;g__Blautia_A;s__Blautia_A sp900066165	ERS436662	ERP005534	France	ftp://ftp.ebi.ac.uk/pub/databases/metagenomics/mgnify_genomes/human-gut/v1.0/all_genomes/MGYG-HGUT-000/MGYG-HGUT-00002/genomes1/GUT_GENOME283598.gff.gz	1
GUT_GENOME151498_02538	GUT_GENOME000472_00600	AAO76887.1	O-deglycosylation	1	950	5	954	950	99.789	0	1978	100	6561074	47	391381	42.82	99.41	0.08	GUT_GENOME001120	d__Bacteria;p__Bacteroidota;c__Bacteroidia;o__Bacteroidales;f__Bacteroidaceae;g__Bacteroides;s__Bacteroides thetaiotaomicron	ERS2046372	ERP105624	United Kingdom	ftp://ftp.ebi.ac.uk/pub/databases/metagenomics/mgnify_genomes/human-gut/v1.0/all_genomes/MGYG-HGUT-001/MGYG-HGUT-00196/genomes1/GUT_GENOME000472.gff.gz	26
GUT_GENOME181366_02741	GUT_GENOME181366_02741	AAO76887.1	O-deglycosylation	1	950	5	954	950	99.789	0	1974	100	5700469	481	18265	42.85	74.31	1.72	GUT_GENOME001120	d__Bacteria;p__Bacteroidota;c__Bacteroidia;o__Bacteroidales;f__Bacteroidaceae;g__Bacteroides;s__Bacteroides thetaiotaomicron	SRS1596838	SRP080787	Mongolia	ftp://ftp.ebi.ac.uk/pub/databases/metagenomics/mgnify_genomes/human-gut/v1.0/all_genomes/MGYG-HGUT-001/MGYG-HGUT-00196/genomes1/GUT_GENOME181366.gff.gz	1
GUT_GENOME283771_00962	GUT_GENOME283771_00962	CCC80442.1	De-rhamnosylation	4	523	3	521	525	42.857	8.98e-150	448	99	3090700	359	12744	43.58	79.44	3.51	GUT_GENOME000004	d__Bacteria;p__Firmicutes_A;c__Clostridia;o__Lachnospirales;f__Lachnospiraceae;g__Blautia_A;s__Blautia_A sp900066165	ERS436798	ERP005534	France	ftp://ftp.ebi.ac.uk/pub/databases/metagenomics/mgnify_genomes/human-gut/v1.0/all_genomes/MGYG-HGUT-000/MGYG-HGUT-00002/genomes1/GUT_GENOME283771.gff.gz	1
GUT_GENOME202875_00917	GUT_GENOME202875_00917	AAO76887.1	O-deglycosylation	1	950	5	954	950	99.789	0	1974	100	4540059	673	8452	43.18	55.6	0	GUT_GENOME001120	d__Bacteria;p__Bacteroidota;c__Bacteroidia;o__Bacteroidales;f__Bacteroidaceae;g__Bacteroides;s__Bacteroides thetaiotaomicron	SRS1996016	SRP100518	Spain	ftp://ftp.ebi.ac.uk/pub/databases/metagenomics/mgnify_genomes/human-gut/v1.0/all_genomes/MGYG-HGUT-001/MGYG-HGUT-00196/genomes2/GUT_GENOME202875.gff.gz	1
GUT_GENOME214441_02499	GUT_GENOME214441_02499	AAO76887.1	O-deglycosylation	1	950	5	954	950	99.789	0	1977	100	3614878	142	62200	43.88	50.22	0	GUT_GENOME001120	d__Bacteria;p__Bacteroidota;c__Bacteroidia;o__Bacteroidales;f__Bacteroidaceae;g__Bacteroides;s__Bacteroides thetaiotaomicron	SRS018351	SRP002163	United States	ftp://ftp.ebi.ac.uk/pub/databases/metagenomics/mgnify_genomes/human-gut/v1.0/all_genomes/MGYG-HGUT-001/MGYG-HGUT-00196/genomes1/GUT_GENOME214441.gff.gz	1
GUT_GENOME250939_02907	GUT_GENOME250939_02907	AAO76887.1	O-deglycosylation	1	950	5	954	950	99.789	0	1977	100	6355783	125	85692	42.75	83.79	0.86	GUT_GENOME001120	d__Bacteria;p__Bacteroidota;c__Bacteroidia;o__Bacteroidales;f__Bacteroidaceae;g__Bacteroides;s__Bacteroides thetaiotaomicron	ERS746939	ERP010700	United Kingdom	ftp://ftp.ebi.ac.uk/pub/databases/metagenomics/mgnify_genomes/human-gut/v1.0/all_genomes/MGYG-HGUT-001/MGYG-HGUT-00196/genomes1/GUT_GENOME250939.gff.gz	1
GUT_GENOME252349_00225	GUT_GENOME099460_02767	AAO76887.1	O-deglycosylation	1	950	5	954	950	99.789	0	1976	100	4647520	248	28679	42.94	50.86	0	GUT_GENOME001120	d__Bacteria;p__Bacteroidota;c__Bacteroidia;o__Bacteroidales;f__Bacteroidaceae;g__Bacteroides;s__Bacteroides thetaiotaomicron	ERS1343405	ERP017091	China	ftp://ftp.ebi.ac.uk/pub/databases/metagenomics/mgnify_genomes/human-gut/v1.0/all_genomes/MGYG-HGUT-001/MGYG-HGUT-00196/genomes1/GUT_GENOME099460.gff.gz	6
GUT_GENOME285243_00638	GUT_GENOME285243_00638	CCC80442.1	De-rhamnosylation	4	523	3	521	525	43.238	9.69e-152	453	99	3485990	285	22335	43.23	90.83	4.32	GUT_GENOME000004	d__Bacteria;p__Firmicutes_A;c__Clostridia;o__Lachnospirales;f__Lachnospiraceae;g__Blautia_A;s__Blautia_A sp900066165	ERS436799	ERP005534	France	ftp://ftp.ebi.ac.uk/pub/databases/metagenomics/mgnify_genomes/human-gut/v1.0/all_genomes/MGYG-HGUT-000/MGYG-HGUT-00002/genomes1/GUT_GENOME285243.gff.gz	1
GUT_GENOME285765_00636	GUT_GENOME285765_00636	CCC80442.1	De-rhamnosylation	4	523	3	521	525	42.857	9.69e-150	448	99	2984174	260	18019	43.74	87.76	0.76	GUT_GENOME000004	d__Bacteria;p__Firmicutes_A;c__Clostridia;o__Lachnospirales;f__Lachnospiraceae;g__Blautia_A;s__Blautia_A sp900066165	ERS436820	ERP005534	Germany	ftp://ftp.ebi.ac.uk/pub/databases/metagenomics/mgnify_genomes/human-gut/v1.0/all_genomes/MGYG-HGUT-000/MGYG-HGUT-00002/genomes1/GUT_GENOME285765.gff.gz	1
GUT_GENOME285765_01429	GUT_GENOME285765_01429	BBG22493.1	C-deglyc (PUE)	1	367	1	357	367	51.771	4.32e-131	388	100	2984174	260	18019	43.74	87.76	0.76	GUT_GENOME000004	d__Bacteria;p__Firmicutes_A;c__Clostridia;o__Lachnospirales;f__Lachnospiraceae;g__Blautia_A;s__Blautia_A sp900066165	ERS436820	ERP005534	Germany	ftp://ftp.ebi.ac.uk/pub/databases/metagenomics/mgnify_genomes/human-gut/v1.0/all_genomes/MGYG-HGUT-000/MGYG-HGUT-00002/genomes1/GUT_GENOME285765.gff.gz	1
GUT_GENOME259220_01585	GUT_GENOME259220_01585	AAO76887.1	O-deglycosylation	1	950	5	954	950	99.789	0	1977	100	6134399	206	63329	42.62	93.28	2.02	GUT_GENOME001120	d__Bacteria;p__Bacteroidota;c__Bacteroidia;o__Bacteroidales;f__Bacteroidaceae;g__Bacteroides;s__Bacteroides thetaiotaomicron	ERS746814	ERP010700	United Kingdom	ftp://ftp.ebi.ac.uk/pub/databases/metagenomics/mgnify_genomes/human-gut/v1.0/all_genomes/MGYG-HGUT-001/MGYG-HGUT-00196/genomes1/GUT_GENOME259220.gff.gz	1
GUT_GENOME113363_00056	GUT_GENOME113363_00056	AAO76887.1	O-deglycosylation	1	950	5	954	950	99.789	0	1977	100	4683748	489	12932	42.07	71.9	3.45	GUT_GENOME096080	d__Bacteria;p__Bacteroidota;c__Bacteroidia;o__Bacteroidales;f__Bacteroidaceae;g__Bacteroides;s__Bacteroides xylanisolvens	ERS328974	ERP003612	Denmark	ftp://ftp.ebi.ac.uk/pub/databases/metagenomics/mgnify_genomes/human-gut/v1.0/all_genomes/MGYG-HGUT-013/MGYG-HGUT-01345/genomes1/GUT_GENOME113363.gff.gz	1
GUT_GENOME285938_00065	GUT_GENOME285938_00065	ANI69962.1	O-demethylation	2	257	1	255	257	40.078	5.87e-56	203	94	3250199	115	54901	43.27	90.93	0.63	GUT_GENOME000004	d__Bacteria;p__Firmicutes_A;c__Clostridia;o__Lachnospirales;f__Lachnospiraceae;g__Blautia_A;s__Blautia_A sp900066165	ERS436829	ERP005534	Germany	ftp://ftp.ebi.ac.uk/pub/databases/metagenomics/mgnify_genomes/human-gut/v1.0/all_genomes/MGYG-HGUT-000/MGYG-HGUT-00002/genomes1/GUT_GENOME285938.gff.gz	1
GUT_GENOME285938_00100	GUT_GENOME285938_00100	CCC80442.1	De-rhamnosylation	4	523	3	521	525	42.857	9.48e-150	448	99	3250199	115	54901	43.27	90.93	0.63	GUT_GENOME000004	d__Bacteria;p__Firmicutes_A;c__Clostridia;o__Lachnospirales;f__Lachnospiraceae;g__Blautia_A;s__Blautia_A sp900066165	ERS436829	ERP005534	Germany	ftp://ftp.ebi.ac.uk/pub/databases/metagenomics/mgnify_genomes/human-gut/v1.0/all_genomes/MGYG-HGUT-000/MGYG-HGUT-00002/genomes1/GUT_GENOME285938.gff.gz	1
GUT_GENOME151498_02538	GUT_GENOME109893_00262	AAO76887.1	O-deglycosylation	1	950	5	954	950	99.789	0	1978	100	4183422	57	116613	46.69	96.65	1.12	GUT_GENOME096083	d__Bacteria;p__Bacteroidota;c__Bacteroidia;o__Bacteroidales;f__Bacteroidaceae;g__Bacteroides;s__Bacteroides uniformis	ERS328859	ERP003612	Denmark	ftp://ftp.ebi.ac.uk/pub/databases/metagenomics/mgnify_genomes/human-gut/v1.0/all_genomes/MGYG-HGUT-013/MGYG-HGUT-01346/genomes3/GUT_GENOME109893.gff.gz	1
GUT_GENOME184381_02228	GUT_GENOME184381_02228	AAO76887.1	O-deglycosylation	16	950	1	935	935	99.786	0	1947	98	4806220	864	6464	42.98	57.05	0	GUT_GENOME001120	d__Bacteria;p__Bacteroidota;c__Bacteroidia;o__Bacteroidales;f__Bacteroidaceae;g__Bacteroides;s__Bacteroides thetaiotaomicron	SRS1735673	SRP090628	Estonia	ftp://ftp.ebi.ac.uk/pub/databases/metagenomics/mgnify_genomes/human-gut/v1.0/all_genomes/MGYG-HGUT-001/MGYG-HGUT-00196/genomes1/GUT_GENOME184381.gff.gz	2
GUT_GENOME042151_00490	GUT_GENOME042151_00490	KEF27912.1	O-deglycosylation	1	809	1	811	811	90.752	0	1484	100	1373678	266	5992	60.46	77.68	2.49	GUT_GENOME142522	d__Bacteria;p__Actinobacteriota;c__Actinobacteria;o__Actinomycetales;f__Bifidobacteriaceae;g__Bifidobacterium;s__Bifidobacterium adolescentis	ERS1069677	ERP013827	Netherlands	ftp://ftp.ebi.ac.uk/pub/databases/metagenomics/mgnify_genomes/human-gut/v1.0/all_genomes/MGYG-HGUT-023/MGYG-HGUT-02395/genomes5/GUT_GENOME042151.gff.gz	1
GUT_GENOME286235_00029	GUT_GENOME286235_00029	ANI69962.1	O-demethylation	2	257	1	255	257	40.078	5.37e-56	203	94	3304510	738	5234	43.08	80.15	4.18	GUT_GENOME000004	d__Bacteria;p__Firmicutes_A;c__Clostridia;o__Lachnospirales;f__Lachnospiraceae;g__Blautia_A;s__Blautia_A sp900066165	ERS436837	ERP005534	Germany	ftp://ftp.ebi.ac.uk/pub/databases/metagenomics/mgnify_genomes/human-gut/v1.0/all_genomes/MGYG-HGUT-000/MGYG-HGUT-00002/genomes1/GUT_GENOME286235.gff.gz	1
GUT_GENOME087545_01480	GUT_GENOME087545_01480	KEF27912.1	O-deglycosylation	1	809	1	811	811	90.752	0	1501	100	2038758	45	71771	59.52	98.79	1.44	GUT_GENOME142522	d__Bacteria;p__Actinobacteriota;c__Actinobacteria;o__Actinomycetales;f__Bifidobacteriaceae;g__Bifidobacterium;s__Bifidobacterium adolescentis	ERS608499	ERP008729	Austria	ftp://ftp.ebi.ac.uk/pub/databases/metagenomics/mgnify_genomes/human-gut/v1.0/all_genomes/MGYG-HGUT-023/MGYG-HGUT-02395/genomes2/GUT_GENOME087545.gff.gz	1
GUT_GENOME286235_02059	GUT_GENOME286235_02059	CCC80442.1	De-rhamnosylation	4	523	3	521	525	43.238	9.69e-152	453	99	3304510	738	5234	43.08	80.15	4.18	GUT_GENOME000004	d__Bacteria;p__Firmicutes_A;c__Clostridia;o__Lachnospirales;f__Lachnospiraceae;g__Blautia_A;s__Blautia_A sp900066165	ERS436837	ERP005534	Germany	ftp://ftp.ebi.ac.uk/pub/databases/metagenomics/mgnify_genomes/human-gut/v1.0/all_genomes/MGYG-HGUT-000/MGYG-HGUT-00002/genomes1/GUT_GENOME286235.gff.gz	1
GUT_GENOME086905_00244	GUT_GENOME086905_00244	QBM20341.1	De-rhamnosylation	2	565	16	585	572	48.077	0	535	98	2193157	131	60710	61.03	78.68	4.65	GUT_GENOME000008	d__Bacteria;p__Bacteroidota;c__Bacteroidia;o__Bacteroidales;f__Rikenellaceae;g__Alistipes;s__Alistipes shahii	ERS537410	ERP006678	China	ftp://ftp.ebi.ac.uk/pub/databases/metagenomics/mgnify_genomes/human-gut/v1.0/all_genomes/MGYG-HGUT-000/MGYG-HGUT-00003/genomes1/GUT_GENOME086905.gff.gz	1
GUT_GENOME088464_00792	GUT_GENOME088464_00792	KEF27912.1	O-deglycosylation	1	809	1	811	811	90.752	0	1479	100	1724290	356	6522	59.97	82.19	0.85	GUT_GENOME142522	d__Bacteria;p__Actinobacteriota;c__Actinobacteria;o__Actinomycetales;f__Bifidobacteriaceae;g__Bifidobacterium;s__Bifidobacterium adolescentis	ERS608539	ERP008729	Austria	ftp://ftp.ebi.ac.uk/pub/databases/metagenomics/mgnify_genomes/human-gut/v1.0/all_genomes/MGYG-HGUT-023/MGYG-HGUT-02395/genomes5/GUT_GENOME088464.gff.gz	1
GUT_GENOME180838_01089	GUT_GENOME180838_01089	QBM20341.1	De-rhamnosylation	17	568	26	582	559	48.837	0	536	96	2211529	214	14282	61.48	85.59	2.88	GUT_GENOME000008	d__Bacteria;p__Bacteroidota;c__Bacteroidia;o__Bacteroidales;f__Rikenellaceae;g__Alistipes;s__Alistipes shahii	SRS1596786	SRP080787	Mongolia	ftp://ftp.ebi.ac.uk/pub/databases/metagenomics/mgnify_genomes/human-gut/v1.0/all_genomes/MGYG-HGUT-000/MGYG-HGUT-00003/genomes2/GUT_GENOME180838.gff.gz	1
GUT_GENOME212767_01183	GUT_GENOME086632_01200	QBM20341.1	De-rhamnosylation	2	501	17	522	508	47.638	1.15e-152	461	87	2466841	194	19989	61.03	92.47	3.63	GUT_GENOME000008	d__Bacteria;p__Bacteroidota;c__Bacteroidia;o__Bacteroidales;f__Rikenellaceae;g__Alistipes;s__Alistipes shahii	ERS537397	ERP006678	China	ftp://ftp.ebi.ac.uk/pub/databases/metagenomics/mgnify_genomes/human-gut/v1.0/all_genomes/MGYG-HGUT-000/MGYG-HGUT-00003/genomes2/GUT_GENOME086632.gff.gz	1
GUT_GENOME219409_01883	GUT_GENOME219409_01883	ANI69961.1	O-demethylation	4	209	3	208	206	44.175	1.8e-53	179	98	2959749	56	84566	60.06	95.91	0.05	GUT_GENOME000008	d__Bacteria;p__Bacteroidota;c__Bacteroidia;o__Bacteroidales;f__Rikenellaceae;g__Alistipes;s__Alistipes shahii	SRS146812	SRP002163	United States	ftp://ftp.ebi.ac.uk/pub/databases/metagenomics/mgnify_genomes/human-gut/v1.0/all_genomes/MGYG-HGUT-000/MGYG-HGUT-00003/genomes1/GUT_GENOME219409.gff.gz	2
GUT_GENOME231280_00698	GUT_GENOME035685_02207	AAQ12341.1	Phloretin hydrolysis	20	274	11	267	260	46.923	1.56e-78	248	93	2841490	73	76107	59.47	98.56	0.48	GUT_GENOME000008	d__Bacteria;p__Bacteroidota;c__Bacteroidia;o__Bacteroidales;f__Rikenellaceae;g__Alistipes;s__Alistipes shahii	ERS1015931	ERP013563	China	ftp://ftp.ebi.ac.uk/pub/databases/metagenomics/mgnify_genomes/human-gut/v1.0/all_genomes/MGYG-HGUT-000/MGYG-HGUT-00003/genomes3/GUT_GENOME035685.gff.gz	1
GUT_GENOME032556_02283	GUT_GENOME032556_02283	BBG22493.1	C-deglyc (PUE)	65	365	1	300	303	43.234	1.45e-87	275	82	2417371	387	7534	55.36	82.38	2.24	GUT_GENOME000010	d__Bacteria;p__Firmicutes_A;c__Clostridia;o__Oscillospirales;f__Ruminococcaceae;g__Anaerotruncus;s__Anaerotruncus colihominis	ERS1015659	ERP013562	China	ftp://ftp.ebi.ac.uk/pub/databases/metagenomics/mgnify_genomes/human-gut/v1.0/all_genomes/MGYG-HGUT-000/MGYG-HGUT-00004/genomes1/GUT_GENOME032556.gff.gz	1
GUT_GENOME034902_01022	GUT_GENOME034902_01022	BBG22493.1	C-deglyc (PUE)	1	365	1	363	367	44.414	3.51e-100	310	99	2723329	260	14130	55.23	89.71	4.03	GUT_GENOME000010	d__Bacteria;p__Firmicutes_A;c__Clostridia;o__Oscillospirales;f__Ruminococcaceae;g__Anaerotruncus;s__Anaerotruncus colihominis	ERS1015896	ERP013563	China	ftp://ftp.ebi.ac.uk/pub/databases/metagenomics/mgnify_genomes/human-gut/v1.0/all_genomes/MGYG-HGUT-000/MGYG-HGUT-00004/genomes1/GUT_GENOME034902.gff.gz	1
GUT_GENOME034902_02001	GUT_GENOME034902_02001	ANI69961.1	O-demethylation	3	204	4	205	202	44.059	8.1e-62	201	96	2723329	260	14130	55.23	89.71	4.03	GUT_GENOME000010	d__Bacteria;p__Firmicutes_A;c__Clostridia;o__Oscillospirales;f__Ruminococcaceae;g__Anaerotruncus;s__Anaerotruncus colihominis	ERS1015896	ERP013563	China	ftp://ftp.ebi.ac.uk/pub/databases/metagenomics/mgnify_genomes/human-gut/v1.0/all_genomes/MGYG-HGUT-000/MGYG-HGUT-00004/genomes1/GUT_GENOME034902.gff.gz	1
GUT_GENOME103802_00278	GUT_GENOME000010_00089	ANI69961.1	O-demethylation	3	204	4	205	202	44.059	3.94e-61	199	96	3699857	105	90296	54.19	98.66	0.22	GUT_GENOME000010	d__Bacteria;p__Firmicutes_A;c__Clostridia;o__Oscillospirales;f__Ruminococcaceae;g__Anaerotruncus;s__Anaerotruncus colihominis	ERS370072	ERP105624	United Kingdom	ftp://ftp.ebi.ac.uk/pub/databases/metagenomics/mgnify_genomes/human-gut/v1.0/all_genomes/MGYG-HGUT-000/MGYG-HGUT-00004/genomes1/GUT_GENOME000010.gff.gz	15
GUT_GENOME176871_01071	GUT_GENOME000010_02840	BBG22493.1	C-deglyc (PUE)	1	365	1	363	367	44.687	5.97e-101	312	99	3699857	105	90296	54.19	98.66	0.22	GUT_GENOME000010	d__Bacteria;p__Firmicutes_A;c__Clostridia;o__Oscillospirales;f__Ruminococcaceae;g__Anaerotruncus;s__Anaerotruncus colihominis	ERS370072	ERP105624	United Kingdom	ftp://ftp.ebi.ac.uk/pub/databases/metagenomics/mgnify_genomes/human-gut/v1.0/all_genomes/MGYG-HGUT-000/MGYG-HGUT-00004/genomes1/GUT_GENOME000010.gff.gz	7
GUT_GENOME239661_02003	GUT_GENOME239661_02003	BBG22493.1	C-deglyc (PUE)	1	365	1	363	367	44.687	3.51e-100	310	99	3616677	75	87182	54.45	97.99	0.22	GUT_GENOME000010	d__Bacteria;p__Firmicutes_A;c__Clostridia;o__Oscillospirales;f__Ruminococcaceae;g__Anaerotruncus;s__Anaerotruncus colihominis	SAMN09736874	PRJNA482748	China	ftp://ftp.ebi.ac.uk/pub/databases/metagenomics/mgnify_genomes/human-gut/v1.0/all_genomes/MGYG-HGUT-000/MGYG-HGUT-00004/genomes1/GUT_GENOME239661.gff.gz	1
GUT_GENOME243925_02238	GUT_GENOME243925_02238	ANI69961.1	O-demethylation	3	204	4	205	202	43.564	5.58e-61	198	96	2529971	426	7908	55.89	85.27	1.34	GUT_GENOME000010	d__Bacteria;p__Firmicutes_A;c__Clostridia;o__Oscillospirales;f__Ruminococcaceae;g__Anaerotruncus;s__Anaerotruncus colihominis	SRS1101269	SRP064400	Canada	ftp://ftp.ebi.ac.uk/pub/databases/metagenomics/mgnify_genomes/human-gut/v1.0/all_genomes/MGYG-HGUT-000/MGYG-HGUT-00004/genomes1/GUT_GENOME243925.gff.gz	1
GUT_GENOME000046_02036	GUT_GENOME000046_02036	ADK16070.1	Flr	1	314	1	313	314	62.42	3.22e-145	420	100	4565363	77	140680	28.52	99.19	0	GUT_GENOME000046	d__Bacteria;p__Firmicutes_A;c__Clostridia;o__Clostridiales;f__Clostridiaceae;g__Clostridium;s__Clostridium butyricum	ERS417246	ERP105624	United Kingdom	ftp://ftp.ebi.ac.uk/pub/databases/metagenomics/mgnify_genomes/human-gut/v1.0/all_genomes/MGYG-HGUT-000/MGYG-HGUT-00014/genomes1/GUT_GENOME000046.gff.gz	1
GUT_GENOME000017_00127	GUT_GENOME000017_00127	EHM54434.1	CHI	1	279	1	282	282	63.121	2.97e-130	380	100	3930721	32	350045	28.59	99.3	0	GUT_GENOME000017	d__Bacteria;p__Firmicutes_A;c__Clostridia;o__Peptostreptococcales;f__Peptostreptococcaceae;g__Terrisporobacter;s__Terrisporobacter glycolicus_A	ERS417217	ERP105624	United Kingdom	ftp://ftp.ebi.ac.uk/pub/databases/metagenomics/mgnify_genomes/human-gut/v1.0/all_genomes/MGYG-HGUT-000/MGYG-HGUT-00005/genomes1/GUT_GENOME000017.gff.gz	1
GUT_GENOME162483_00468	GUT_GENOME162483_00468	KEF27912.1	O-deglycosylation	1	809	1	811	811	90.752	0	1483	100	1184584	78	27304	60.32	61.4	0.45	GUT_GENOME142522	d__Bacteria;p__Actinobacteriota;c__Actinobacteria;o__Actinomycetales;f__Bifidobacteriaceae;g__Bifidobacterium;s__Bifidobacterium adolescentis	SRS1876558	SRP095580	Netherlands	ftp://ftp.ebi.ac.uk/pub/databases/metagenomics/mgnify_genomes/human-gut/v1.0/all_genomes/MGYG-HGUT-023/MGYG-HGUT-02395/genomes2/GUT_GENOME162483.gff.gz	1
GUT_GENOME207236_00223	GUT_GENOME000017_00866	ANI69961.1	O-demethylation	24	209	28	213	186	40.323	9.26e-41	147	88	3930721	32	350045	28.59	99.3	0	GUT_GENOME000017	d__Bacteria;p__Firmicutes_A;c__Clostridia;o__Peptostreptococcales;f__Peptostreptococcaceae;g__Terrisporobacter;s__Terrisporobacter glycolicus_A	ERS417217	ERP105624	United Kingdom	ftp://ftp.ebi.ac.uk/pub/databases/metagenomics/mgnify_genomes/human-gut/v1.0/all_genomes/MGYG-HGUT-000/MGYG-HGUT-00005/genomes1/GUT_GENOME000017.gff.gz	2
GUT_GENOME173706_01481	GUT_GENOME132001_00797	KEF27912.1	O-deglycosylation	1	809	1	811	811	90.752	0	1501	100	1118508	27	70314	59.86	50.61	0	GUT_GENOME142522	d__Bacteria;p__Actinobacteriota;c__Actinobacteria;o__Actinomycetales;f__Bifidobacteriaceae;g__Bifidobacterium;s__Bifidobacterium adolescentis	NA	NA	Germany	ftp://ftp.ebi.ac.uk/pub/databases/metagenomics/mgnify_genomes/human-gut/v1.0/all_genomes/MGYG-HGUT-023/MGYG-HGUT-02395/genomes2/GUT_GENOME132001.gff.gz	2
GUT_GENOME000020_01806	GUT_GENOME000020_01806	BBG22493.1	C-deglyc (PUE)	4	365	3	355	362	51.934	7.16e-130	385	99	2822948	36	121393	32.65	99.26	1.39	GUT_GENOME000020	d__Bacteria;p__Firmicutes;c__Bacilli;o__Staphylococcales;f__Staphylococcaceae;g__Staphylococcus;s__Staphylococcus xylosus	ERS417220	ERP105624	United Kingdom	ftp://ftp.ebi.ac.uk/pub/databases/metagenomics/mgnify_genomes/human-gut/v1.0/all_genomes/MGYG-HGUT-000/MGYG-HGUT-00006/genomes1/GUT_GENOME000020.gff.gz	1
GUT_GENOME016827_01490	GUT_GENOME016827_01490	AAV43293.1	De-rhamnosylation	1	876	1	873	880	54.773	0	972	94	1790421	188	19915	34.48	97.67	1.29	GUT_GENOME000022	d__Bacteria;p__Firmicutes;c__Bacilli;o__Lactobacillales;f__Lactobacillaceae;g__Lactobacillus;s__Lactobacillus johnsonii	SRS1997013	SRP100575	China	ftp://ftp.ebi.ac.uk/pub/databases/metagenomics/mgnify_genomes/human-gut/v1.0/all_genomes/MGYG-HGUT-000/MGYG-HGUT-00008/genomes1/GUT_GENOME016827.gff.gz	2
GUT_GENOME000029_00605	GUT_GENOME000029_00605	BBG22493.1	C-deglyc (PUE)	3	367	2	357	365	55.616	9.72e-146	426	99	2727159	58	74981	31.83	99.45	1.66	GUT_GENOME000029	d__Bacteria;p__Firmicutes;c__Bacilli;o__Staphylococcales;f__Staphylococcaceae;g__Staphylococcus_A;s__Staphylococcus_A lentus	ERS417228	ERP105624	United Kingdom	ftp://ftp.ebi.ac.uk/pub/databases/metagenomics/mgnify_genomes/human-gut/v1.0/all_genomes/MGYG-HGUT-000/MGYG-HGUT-00010/genomes1/GUT_GENOME000029.gff.gz	1
GUT_GENOME000030_00015	GUT_GENOME000030_00015	BBG22493.1	C-deglyc (PUE)	1	365	1	356	365	51.507	9.95e-131	387	99	2927511	14	523832	32.39	99.44	1.39	GUT_GENOME000030	d__Bacteria;p__Firmicutes;c__Bacilli;o__Staphylococcales;f__Staphylococcaceae;g__Staphylococcus;s__Staphylococcus xylosus_B	ERS417230	ERP105624	United Kingdom	ftp://ftp.ebi.ac.uk/pub/databases/metagenomics/mgnify_genomes/human-gut/v1.0/all_genomes/MGYG-HGUT-000/MGYG-HGUT-00011/genomes1/GUT_GENOME000030.gff.gz	1
GUT_GENOME000035_02033	GUT_GENOME000035_02033	QBM20341.1	De-rhamnosylation	6	565	22	588	568	46.127	9.34e-178	524	98	6368528	56	251063	42.15	99.08	0.08	GUT_GENOME000035	d__Bacteria;p__Bacteroidota;c__Bacteroidia;o__Bacteroidales;f__Bacteroidaceae;g__Bacteroides;s__	ERS417236	ERP105624	United Kingdom	ftp://ftp.ebi.ac.uk/pub/databases/metagenomics/mgnify_genomes/human-gut/v1.0/all_genomes/MGYG-HGUT-000/MGYG-HGUT-00013/genomes1/GUT_GENOME000035.gff.gz	2
GUT_GENOME000035_03414	GUT_GENOME000035_03414	WP_011107561.1	De-rhamnosylation	1	729	6	734	729	93.416	0	1392	100	6368528	56	251063	42.15	99.08	0.08	GUT_GENOME000035	d__Bacteria;p__Bacteroidota;c__Bacteroidia;o__Bacteroidales;f__Bacteroidaceae;g__Bacteroides;s__	ERS417236	ERP105624	United Kingdom	ftp://ftp.ebi.ac.uk/pub/databases/metagenomics/mgnify_genomes/human-gut/v1.0/all_genomes/MGYG-HGUT-000/MGYG-HGUT-00013/genomes1/GUT_GENOME000035.gff.gz	2
GUT_GENOME000589_04629	GUT_GENOME000589_04629	WP_011107561.1	De-rhamnosylation	1	729	6	734	729	93.416	0	1391	100	6435467	46	320340	42.26	99.19	0.73	GUT_GENOME000035	d__Bacteria;p__Bacteroidota;c__Bacteroidia;o__Bacteroidales;f__Bacteroidaceae;g__Bacteroides;s__	ERS2046576	ERP105624	Canada	ftp://ftp.ebi.ac.uk/pub/databases/metagenomics/mgnify_genomes/human-gut/v1.0/all_genomes/MGYG-HGUT-000/MGYG-HGUT-00013/genomes1/GUT_GENOME000589.gff.gz	1
GUT_GENOME197850_01431	GUT_GENOME159967_01080	KEF27912.1	O-deglycosylation	1	809	1	811	811	90.752	0	1485	100	1976439	73	52146	59.84	93.17	0.23	GUT_GENOME142522	d__Bacteria;p__Actinobacteriota;c__Actinobacteria;o__Actinomycetales;f__Bifidobacteriaceae;g__Bifidobacterium;s__Bifidobacterium adolescentis	SRS1876630	SRP095580	Netherlands	ftp://ftp.ebi.ac.uk/pub/databases/metagenomics/mgnify_genomes/human-gut/v1.0/all_genomes/MGYG-HGUT-023/MGYG-HGUT-02395/genomes3/GUT_GENOME159967.gff.gz	2
GUT_GENOME001107_01556	GUT_GENOME001107_01556	ANI69961.1	O-demethylation	1	210	1	210	210	42.857	3.06e-57	189	99	7057842	113	151944	41.76	99.46	1.43	GUT_GENOME000035	d__Bacteria;p__Bacteroidota;c__Bacteroidia;o__Bacteroidales;f__Bacteroidaceae;g__Bacteroides;s__	SAMN09734534	PRJNA482748	China	ftp://ftp.ebi.ac.uk/pub/databases/metagenomics/mgnify_genomes/human-gut/v1.0/all_genomes/MGYG-HGUT-000/MGYG-HGUT-00013/genomes1/GUT_GENOME001107.gff.gz	1
GUT_GENOME004578_01719	GUT_GENOME001092_01016	QBM20341.1	De-rhamnosylation	20	565	21	604	584	43.151	7.04e-175	517	95	6674550	150	127260	41.74	99.51	0.11	GUT_GENOME000035	d__Bacteria;p__Bacteroidota;c__Bacteroidia;o__Bacteroidales;f__Bacteroidaceae;g__Bacteroides;s__	SAMN09734518	PRJNA482748	China	ftp://ftp.ebi.ac.uk/pub/databases/metagenomics/mgnify_genomes/human-gut/v1.0/all_genomes/MGYG-HGUT-000/MGYG-HGUT-00013/genomes1/GUT_GENOME001092.gff.gz	2
GUT_GENOME051954_02651	GUT_GENOME051954_02651	WP_011107561.1	De-rhamnosylation	1	729	6	734	729	93.416	0	1392	100	6647583	75	166617	41.74	97.9	3.71	GUT_GENOME000035	d__Bacteria;p__Bacteroidota;c__Bacteroidia;o__Bacteroidales;f__Bacteroidaceae;g__Bacteroides;s__	ERS199209	ERP002061	Spain	ftp://ftp.ebi.ac.uk/pub/databases/metagenomics/mgnify_genomes/human-gut/v1.0/all_genomes/MGYG-HGUT-000/MGYG-HGUT-00013/genomes1/GUT_GENOME051954.gff.gz	4
GUT_GENOME200933_00431	GUT_GENOME200933_00431	KEF27912.1	O-deglycosylation	1	809	1	811	811	90.752	0	1500	100	1830045	273	8583	59.71	89.54	3.52	GUT_GENOME142522	d__Bacteria;p__Actinobacteriota;c__Actinobacteria;o__Actinomycetales;f__Bifidobacteriaceae;g__Bifidobacterium;s__Bifidobacterium adolescentis	SRS1996016	SRP100518	Spain	ftp://ftp.ebi.ac.uk/pub/databases/metagenomics/mgnify_genomes/human-gut/v1.0/all_genomes/MGYG-HGUT-023/MGYG-HGUT-02395/genomes1/GUT_GENOME200933.gff.gz	2
GUT_GENOME027677_00211	GUT_GENOME027677_00211	KEF27912.1	O-deglycosylation	1	809	1	811	811	90.629	0	1481	100	1776007	183	13606	59.75	78.33	1.39	GUT_GENOME142522	d__Bacteria;p__Actinobacteriota;c__Actinobacteria;o__Actinomycetales;f__Bifidobacteriaceae;g__Bifidobacterium;s__Bifidobacterium adolescentis	DRS026599	DRP003048	Japan	ftp://ftp.ebi.ac.uk/pub/databases/metagenomics/mgnify_genomes/human-gut/v1.0/all_genomes/MGYG-HGUT-023/MGYG-HGUT-02395/genomes4/GUT_GENOME027677.gff.gz	1
GUT_GENOME110755_01649	GUT_GENOME110755_01649	WP_011107561.1	De-rhamnosylation	1	729	6	734	729	93.278	0	1386	100	5855123	441	22972	42.03	77.9	0.86	GUT_GENOME000035	d__Bacteria;p__Bacteroidota;c__Bacteroidia;o__Bacteroidales;f__Bacteroidaceae;g__Bacteroides;s__	ERS328900	ERP003612	Denmark	ftp://ftp.ebi.ac.uk/pub/databases/metagenomics/mgnify_genomes/human-gut/v1.0/all_genomes/MGYG-HGUT-000/MGYG-HGUT-00013/genomes1/GUT_GENOME110755.gff.gz	1
GUT_GENOME042411_00128	GUT_GENOME042411_00128	KEF27912.1	O-deglycosylation	1	809	1	811	811	90.629	0	1481	100	1375321	269	6124	59.94	76.39	3.47	GUT_GENOME142522	d__Bacteria;p__Actinobacteriota;c__Actinobacteria;o__Actinomycetales;f__Bifidobacteriaceae;g__Bifidobacterium;s__Bifidobacterium adolescentis	ERS1069681	ERP013827	Netherlands	ftp://ftp.ebi.ac.uk/pub/databases/metagenomics/mgnify_genomes/human-gut/v1.0/all_genomes/MGYG-HGUT-023/MGYG-HGUT-02395/genomes3/GUT_GENOME042411.gff.gz	1
GUT_GENOME136032_03095	GUT_GENOME052204_02920	WP_011107561.1	De-rhamnosylation	1	729	6	734	729	93.416	0	1411	100	6184642	145	72611	41.76	95.26	1.27	GUT_GENOME000035	d__Bacteria;p__Bacteroidota;c__Bacteroidia;o__Bacteroidales;f__Bacteroidaceae;g__Bacteroides;s__	ERS199257	ERP002061	Spain	ftp://ftp.ebi.ac.uk/pub/databases/metagenomics/mgnify_genomes/human-gut/v1.0/all_genomes/MGYG-HGUT-000/MGYG-HGUT-00013/genomes1/GUT_GENOME052204.gff.gz	2
GUT_GENOME042714_00891	GUT_GENOME042714_00891	KEF27912.1	O-deglycosylation	1	809	1	811	811	90.629	0	1482	100	1488574	124	19629	59.37	73.75	1.71	GUT_GENOME142522	d__Bacteria;p__Actinobacteriota;c__Actinobacteria;o__Actinomycetales;f__Bifidobacteriaceae;g__Bifidobacterium;s__Bifidobacterium adolescentis	ERS1069678	ERP013827	Netherlands	ftp://ftp.ebi.ac.uk/pub/databases/metagenomics/mgnify_genomes/human-gut/v1.0/all_genomes/MGYG-HGUT-023/MGYG-HGUT-02395/genomes3/GUT_GENOME042714.gff.gz	1
GUT_GENOME136068_00632	GUT_GENOME136068_00632	WP_011107561.1	De-rhamnosylation	1	729	6	734	729	93.416	0	1392	100	5981198	518	18406	41.97	95.36	1.19	GUT_GENOME000035	d__Bacteria;p__Bacteroidota;c__Bacteroidia;o__Bacteroidales;f__Bacteroidaceae;g__Bacteroides;s__	ERS199259	ERP002061	Spain	ftp://ftp.ebi.ac.uk/pub/databases/metagenomics/mgnify_genomes/human-gut/v1.0/all_genomes/MGYG-HGUT-000/MGYG-HGUT-00013/genomes1/GUT_GENOME136068.gff.gz	1
GUT_GENOME140277_03805	GUT_GENOME001107_03943	WP_011107561.1	De-rhamnosylation	1	729	6	734	729	93.69	0	1436	100	7057842	113	151944	41.76	99.46	1.43	GUT_GENOME000035	d__Bacteria;p__Bacteroidota;c__Bacteroidia;o__Bacteroidales;f__Bacteroidaceae;g__Bacteroides;s__	SAMN09734534	PRJNA482748	China	ftp://ftp.ebi.ac.uk/pub/databases/metagenomics/mgnify_genomes/human-gut/v1.0/all_genomes/MGYG-HGUT-000/MGYG-HGUT-00013/genomes1/GUT_GENOME001107.gff.gz	1
GUT_GENOME168805_03452	GUT_GENOME043658_00809	WP_011107561.1	De-rhamnosylation	1	729	6	734	729	92.455	0	1389	100	5911648	99	102592	41.81	78.79	1.72	GUT_GENOME000035	d__Bacteria;p__Bacteroidota;c__Bacteroidia;o__Bacteroidales;f__Bacteroidaceae;g__Bacteroides;s__	ERS1076040	ERP014480	Denmark	ftp://ftp.ebi.ac.uk/pub/databases/metagenomics/mgnify_genomes/human-gut/v1.0/all_genomes/MGYG-HGUT-000/MGYG-HGUT-00013/genomes1/GUT_GENOME043658.gff.gz	10
GUT_GENOME043113_00969	GUT_GENOME043113_00969	KEF27912.1	O-deglycosylation	1	809	1	811	811	90.629	0	1484	100	1270848	79	24356	60.36	65.08	1.21	GUT_GENOME142522	d__Bacteria;p__Actinobacteriota;c__Actinobacteria;o__Actinomycetales;f__Bifidobacteriaceae;g__Bifidobacterium;s__Bifidobacterium adolescentis	ERS1069637	ERP013827	Netherlands	ftp://ftp.ebi.ac.uk/pub/databases/metagenomics/mgnify_genomes/human-gut/v1.0/all_genomes/MGYG-HGUT-023/MGYG-HGUT-02395/genomes1/GUT_GENOME043113.gff.gz	1
GUT_GENOME048627_01273	GUT_GENOME048627_01273	KEF27912.1	O-deglycosylation	1	809	1	811	811	90.629	0	1478	100	1933387	163	17471	60.18	96.85	1.03	GUT_GENOME142522	d__Bacteria;p__Actinobacteriota;c__Actinobacteria;o__Actinomycetales;f__Bifidobacteriaceae;g__Bifidobacterium;s__Bifidobacterium adolescentis	ERS1647297	ERP019674	Germany	ftp://ftp.ebi.ac.uk/pub/databases/metagenomics/mgnify_genomes/human-gut/v1.0/all_genomes/MGYG-HGUT-023/MGYG-HGUT-02395/genomes5/GUT_GENOME048627.gff.gz	1
GUT_GENOME224229_04053	GUT_GENOME183311_01480	WP_011107561.1	De-rhamnosylation	1	729	6	734	729	93.416	0	1391	100	6155424	76	143242	41.82	96.31	1.83	GUT_GENOME000035	d__Bacteria;p__Bacteroidota;c__Bacteroidia;o__Bacteroidales;f__Bacteroidaceae;g__Bacteroides;s__	SRS1719522	SRP090628	Finland	ftp://ftp.ebi.ac.uk/pub/databases/metagenomics/mgnify_genomes/human-gut/v1.0/all_genomes/MGYG-HGUT-000/MGYG-HGUT-00013/genomes1/GUT_GENOME183311.gff.gz	4
GUT_GENOME225326_01967	GUT_GENOME225326_01967	WP_011107561.1	De-rhamnosylation	1	729	6	734	729	93.553	0	1392	100	6245480	66	205200	41.82	98.54	0.92	GUT_GENOME000035	d__Bacteria;p__Bacteroidota;c__Bacteroidia;o__Bacteroidales;f__Bacteroidaceae;g__Bacteroides;s__	SRS1735642	SRP090628	Finland	ftp://ftp.ebi.ac.uk/pub/databases/metagenomics/mgnify_genomes/human-gut/v1.0/all_genomes/MGYG-HGUT-000/MGYG-HGUT-00013/genomes1/GUT_GENOME225326.gff.gz	1
GUT_GENOME262988_00138	GUT_GENOME001092_01981	WP_011107561.1	De-rhamnosylation	1	729	6	734	729	93.827	0	1439	100	6674550	150	127260	41.74	99.51	0.11	GUT_GENOME000035	d__Bacteria;p__Bacteroidota;c__Bacteroidia;o__Bacteroidales;f__Bacteroidaceae;g__Bacteroides;s__	SAMN09734518	PRJNA482748	China	ftp://ftp.ebi.ac.uk/pub/databases/metagenomics/mgnify_genomes/human-gut/v1.0/all_genomes/MGYG-HGUT-000/MGYG-HGUT-00013/genomes1/GUT_GENOME001092.gff.gz	2
GUT_GENOME000723_01837	GUT_GENOME000723_01837	ADK16070.1	Flr	1	314	1	313	314	62.739	7.54e-147	424	100	4672842	149	73796	28.57	99.19	0	GUT_GENOME000046	d__Bacteria;p__Firmicutes_A;c__Clostridia;o__Clostridiales;f__Clostridiaceae;g__Clostridium;s__Clostridium butyricum	ERS138173	ERP105624	United Kingdom	ftp://ftp.ebi.ac.uk/pub/databases/metagenomics/mgnify_genomes/human-gut/v1.0/all_genomes/MGYG-HGUT-000/MGYG-HGUT-00014/genomes1/GUT_GENOME000723.gff.gz	2
GUT_GENOME001070_00293	GUT_GENOME001070_00293	ADK16070.1	Flr	1	314	1	313	314	62.42	2.71e-146	423	100	4536065	75	141597	28.51	99.19	0	GUT_GENOME000046	d__Bacteria;p__Firmicutes_A;c__Clostridia;o__Clostridiales;f__Clostridiaceae;g__Clostridium;s__Clostridium butyricum	SAMN09734495	PRJNA482748	China	ftp://ftp.ebi.ac.uk/pub/databases/metagenomics/mgnify_genomes/human-gut/v1.0/all_genomes/MGYG-HGUT-000/MGYG-HGUT-00014/genomes1/GUT_GENOME001070.gff.gz	1
[truncated: 76,889 more rows]

## Sheet: PivotTable
Pivot Table showing the summed frequencies of hits - note that each hit is counted, resulting in a higher number of summed frequencies in the case of gene clusters (e.g. approximately 3-fold for the three genes of dai-equol conversion)
FlavModClass	Sum of Frequencies
C-deglyc (Ec)	4298
[truncated: 12 more rows]
